# Supplementary material for: The influence of smoking and alcohol on bone healing: Systematic review and meta-analysis of non-pathological fractures
Source: PubMed Central journal article supplement (PMC8571530; doi:10.1016/j.eclinm.2021.101179), 2021-10-31
Supplement: mmc1.pdf [file mmc1.pdf]

## Contents

|                                                                                                                                                                                                  |     |
|--------------------------------------------------------------------------------------------------------------------------------------------------------------------------------------------------|-----|
| Appendix S1. The published protocol for the systematic review and meta-analysis .....                                                                                                            | 2   |
| Appendix S2. Search strategies on electronic databases .....                                                                                                                                     | 8   |
| Appendix S3. PRISMA flow chart of the impact of preoperative smoking cessation time, nicotine replacement therapy (NRT), and vaping .....                                                        | 57  |
| Appendix S4. Search results .....                                                                                                                                                                | 58  |
| Appendix S5. Summary of 58 studies for the quantitative synthesis about the impacts of smoking and alcohol consumption .....                                                                     | 59  |
| Appendix S6. Summary of 45 studies for the qualitative synthesis about the impacts of smoking and alcohol consumption .....                                                                      | 86  |
| Appendix S7. Summary of 19 studies about the impacts of preoperative smoking cessation time, nicotine replacement therapy, and vaping .....                                                      | 109 |
| Appendix S8. Risk of bias for 58 studies included in the meta-analyses of the impacts of smoking and alcohol consumption .....                                                                   | 121 |
| Appendix S9. List of studies about the impacts of smoking and alcohol consumption on fracture healing and surgical site infection .....                                                          | 122 |
| Appendix S10. Data of the studies comparing nonunion between smokers and non-smokers .....                                                                                                       | 123 |
| Appendix S11. Forest plot of meta-analysis of nonunion rate of alcohol drinkers vs. non-drinkers ....                                                                                            | 124 |
| Appendix S12. Forest plots of the meta-analyses of secondary outcomes of smokers vs. non-smokers                                                                                                 | 125 |
| Appendix S13. Forest plots of the meta-analyses of secondary outcomes of alcohol drinkers vs. non-drinkers .....                                                                                 | 126 |
| Appendix S14. List of the studies and the results of the impacts of preoperative smoking cessation time, NRT, and vaping .....                                                                   | 127 |
| Appendix S15. Forest plots of the meta-analyses of 15a) impaired wound healing rate of smoking cessation vs. non-smokers and 15b) hematoma rate of smoking cessation vs. continuous smokers..... | 129 |
| Appendix S16. Funnel plots and Rucker's test for publication bias .....                                                                                                                          | 130 |
| Appendix S17. Results of the dose-related analysis of outcomes .....                                                                                                                             | 131 |
| Appendix S18. Results of the subgroup analysis .....                                                                                                                                             | 132 |
| Appendix S19. Results of the sensitivity analysis.....                                                                                                                                           | 140 |
| Appendix S20. Problems in the included studies in four previous systematic reviews concerning the effects of smoking on nonunion and surgical site infection.....                                | 145 |
| Appendix S21. Problems in the included studies in two previous systematic reviews about effects of alcohol drinking on nonunion and surgical site infection .....                                | 150 |
| Appendix S22. Problems in the two previous meta-analyses concerning the effects of preoperative smoking cessation time on wound healing and wound complications .....                            | 153 |

## Appendix S1. The published protocol for the systematic review and meta-analysis

Study Protocol Systematic Review

# Medicine®

OPEN

## Smoking and alcohol drinking and risk of non-union or delayed union after fractures

### A protocol for systematic review and dose–response meta-analysis

Bin Xu, MD<sup>a,b</sup>, Lingxiao Chen, MD<sup>c,\*</sup>, Jae Hyup Lee, MD, PhD<sup>a,d,e,\*</sup>

**Abstract**

**Introduction:** To the best of our knowledge, there is no consensus on dose–response between smoking, alcohol drinking, and bone healing. The aim of the present study is to conduct a comprehensive systematic review and dose–response meta-analysis of studies to estimate the influence of smoking and alcohol use on the success of non-pathologic bone fracture healing in adult patients.

**Methods:** A systematic search will be performed using MEDLINE, EMBASE and Cochrane CENTRAL, CINAHL, and AMED databases to identify randomized controlled trials and observational studies which have assessed the effect of smoking or alcohol drinking on fracture healing. Primary outcomes include delayed union or nonunion rate and time to union. Secondary outcomes are common complications which occur during bone healing including malunion and wound infection. Risk of bias will be evaluated using the Quality In Prognosis Studies (QUIPS) tool for quality assessment of each study. Dose–response meta-analysis will be performed between smoking, alcohol drinking, and bone healing. Evaluation of the quality of evidence will be conducted using the Grading of Recommendations Assessment, Development, and Evaluation (GRADE) system.

**Results:** The present study will assess the effects of smoking and alcohol drinking on non-pathologic bone fracture healing in adult patients.

**Conclusion:** We hope that this systematic review and dose–response meta-analysis will provide high quality evidence on dose–response between smoking, alcohol drinking, and bone fracture healing.

**PROSPERO registration number:** CRD42019131454.

**Abbreviations:** CIs = confident intervals, GRADE = grading of recommendations assessment, development, and evaluation, MD = mean difference, MOOSE = Meta-Analysis Of Observational Studies in Epidemiology, MSC = mesenchymal stem cells, NSAIDs = nonsteroidal anti-inflammatory drugs, OPN = osteopontin, PRISMA-P = preferred reporting items for systematic review and meta-analysis protocols, PROSPERO = International Prospective Register of Systematic Reviews, QUIPS = quality in prognosis studies, RCTs = randomized controlled trials, RRs = risk ratios.

**Keywords:** alcohol drinking, dose–response, fracture healing, smoking, systematic review

*BX is sponsored by China Scholarship Council.*

*The authors have no conflicts of interest to disclose.*

*<sup>a</sup>Department of Orthopedic Surgery, College of Medicine, Seoul National University, Seoul, Republic of Korea, <sup>b</sup>Department of Orthopedic Surgery, Tianjin Hospital, Tianjin University, Tianjin, China, <sup>c</sup>Institute of Bone and Joint Research, Kolling Institute, Sydney Medical School, Faculty of Medicine and Health, University of Sydney, Sydney, New South Wales, Australia, <sup>d</sup>Department of Orthopedic Surgery, SMG-SNU Boramee Medical Center, <sup>e</sup>Institute of Medical and Biological Engineering, Medical Research Center, Seoul National University, Medical Research Center, Seoul, Republic of Korea.*

*\* Correspondence: Jae Hyup Lee, Department of Orthopedic Surgery, College of Medicine, Seoul National University, Seoul, Republic of Korea  
E-mail: spineko@snu.ac.kr; Lingxiao Chen, Institute of Bone and Joint Research, Kolling Institute, Sydney Medical School, Faculty of Medicine and Health, University of Sydney, Sydney, New South Wales, Australia  
E-mail: lche4036@uni.sydney.edu.au.*

*Copyright © 2020 the Author(s). Published by Wolters Kluwer Health, Inc. This is an open access article distributed under the Creative Commons Attribution License 4.0 (CCBY), which permits unrestricted use, distribution, and reproduction in any medium, provided the original work is properly cited.*

*How to cite this article: Xu B, Chen L, Lee JH. Smoking and alcohol drinking and risk of non-union or delayed union after fractures: A protocol for systematic review and dose-response meta-analysis. Medicine 2020;99(5):e18744.*

*Received: 11 December 2019 / Accepted: 16 December 2019*

*<http://dx.doi.org/10.1097/MD.00000000000018744>*

### 1. Introduction

The annual occurrence rate of fractures in the whole skeletal system is 3.6 per 100 people in England.<sup>[1]</sup> Although most of the fractures heal eventually, it has been reported that about 0.1 million of 2 million long bone fractures are converted into nonunion annually in USA.<sup>[2]</sup> Delayed union and nonunion of fractures not only extend the length of hospital stay but also increase economic burden of family.<sup>[3–7]</sup>

The main clinical factors related to inhibition of bone fracture healing include smoking and alcohol consumption.<sup>[8,9]</sup> Previous studies have shown that smokers have higher risk for worse mechanical characteristics of intrinsic trabecular bone,<sup>[10]</sup> bone fractures,<sup>[11,12]</sup> delayed union and non-union after open or closed fractures,<sup>[13–15]</sup> postoperative fracture healing complications including surgical site infection,<sup>[14,16,17]</sup> and mortality after fracture.<sup>[18,19]</sup> Numerous factors including reduction in peripheral blood flow caused by nicotine, which is a power vasoconstrictor, reduction in the oxygen-carrying capacity of hemoglobin due to bonding of hemoglobin with carbon monoxide, and obstacles in aerobic metabolism through inhibition of cytochrome c oxidase caused by hydrogen cyanide are the negative effects of smoking on bone healing.<sup>[13]</sup> Exposure

1

2

to high dose of nicotine has been reported to inhibit bone regeneration in a rabbit osteotomy and distraction model.<sup>[20]</sup> Increase in nonunion rate after plating in proximal humeral fractures along with smoking level was also found in a clinical study.<sup>[21]</sup> Thus, smoking level is considered as an important factor to affect bone healing.

Regarding alcohol drinking, published studies indicate that alcohol consumption has harmful effects on bone health including a higher rate of fracture<sup>[22–25]</sup> and higher incidence of infection at the surgical site.<sup>[26]</sup> Decrease in integrin  $\beta 1$  receptor and osteopontin (OPN) expression is considered as the possible mechanism of delayed union and nonunion of fractures caused by alcohol. Interaction between OPN and integrin  $\beta 1$  receptor induces mesenchymal stem cells (MSC) migration to fracture site and endochondral ossification.<sup>[27,28]</sup> Alcohol consumption has been reported to affect bone repair in a rat fibula osteotomy model in a dose-dependent manner.<sup>[8]</sup> Consequently, alcohol consumption is considered as an important factor related to bone healing.

Only one meta-analysis has been published with a focus on the effect of smoking on the outcomes of fracture healing.<sup>[13]</sup> However, the limitations of the study were as follows:

1. absence of dose–response analysis and
2. the search date of the meta-analysis that was May 2015.

In addition, there exists no meta-analysis about the effect of alcohol drinking on fracture healing. Therefore, our aim is to comprehensively perform a meta-analysis that will investigate dose–response among smoking or alcohol drinking and fracture healing in the entire skeletal system. The results of this meta-analysis might identify prognostic factors associated with bone healing which could help develop the impact of prognostic models for individualized prediction of fracture healing outcomes.

The present study presents the protocol for a systematic review and dose–response meta-analysis, which will compare delayed union or nonunion rates, time to union and complications related to bone healing between smokers and non-smokers and between alcohol users and non-alcohol users. Subsequently, the quantitative relationship between extent of smoking and alcohol consumption and the outcomes mentioned above will be explored.

## 2. Objective

The objective of the current systematic review and dose–response meta-analysis is to investigate the influence of smoking or alcohol use on the success of bone healing in adult patients after non-pathologic fractures by answering the following question: What is the influence of smoking and alcohol drinking on the healing rate, healing time, and complication rate including malunion and wound infection.

## 3. Methods

The current protocol is presented following the Preferred Reporting Items for Systematic Review and Meta-Analysis Protocols (PRISMA-P) guidance<sup>[29]</sup> and the reporting of the meta-analysis will follow the guidelines proposed by Meta-analysis Of Observational Studies in Epidemiology (MOOSE).<sup>[30]</sup> This protocol has been registered in the international prospective register of systematic reviews (PROSPERO; Registration number CRD42019131454).

### 3.1. Eligibility criteria

**3.1.1. Study designs.** Randomized controlled trials (RCTs) and observational studies (cohort, case–control, and cross-sectional studies) will be included in the study.

**3.1.2. Participants.** We will include studies examining adults aged over 18 years who had traumatic bone fractures in any location. Patients with fractures caused by pathological factors, such as cancer, kidney disease, human immunodeficiency virus, and patients who underwent joint replacement using prosthesis or amputation for first-time treatment will be excluded based on the reason of slow healing and low healing rate. If mixed participants with traumatic fractures and pathological fractures exist in a study, we will include the study in which patients with pathological fractures account for <20%.<sup>[31]</sup>

**3.1.3. Exposure.** The studies exploring the effect of current smoking and alcohol consumption on bone healing in patients with traumatic fractures will be included. Definitions of current smoking and current alcohol consumption are shown in the data items section.

**3.1.4. Comparators.** Patients who have never smoked and who never drank will be the comparators of this study. Definitions of never smokers and never drinkers are also presented in the data items section.

**3.1.5. Outcomes.** The outcomes will comprise of delayed union or nonunion rate, time to union, malunion rate, and wound infection rate.

### 3.2. Information sources

We will undertake a systematic search using MEDLINE, EMBASE and Cochrane CENTRAL, CINAHL and AMED databases from inception with language restriction of English. Also, the manual search will be performed by screening references of included studies for relevant references.

### 3.3. Search strategy

Search strategies will be performed by an experienced librarian using keywords of “smoking,” “nicotine,” “cigarettes,” “alcohol,” “alcohol drinking,” “alcoholism,” “fracture,” “bone healing,” “delayed union,” “nonunion,” “malunion,” and “surgical wound infection” through MEDLINE, EMBASE and Cochrane CENTRAL, CINAHL and AMED databases with the limitation to English. The full search strategy used in MEDLINE via OVID is presented in Table 1.

### 3.4. Study records

**3.4.1. Data management.** We will use EndNote X7 to manage search results, remove duplicate literatures, and select studies based on the eligibility criteria.

**3.4.2. Selection process.** The selection process will be presented in a PRISMA-compliant flow chart (Fig. 1). Study selection will be independently performed by two authors by screening the titles and abstracts of literatures. Moreover, further selection will be done by reading full text of records identified potentially eligible studies. Any disagreement generated during selection process will be resolved based on mutual discussion with each other or with the help from the third reviewer. In addition, the information about the excluded studies whose full

**Table 1**  
MEDLINE via OVID search strategy.

| Number | Query                                                                                                |
|--------|------------------------------------------------------------------------------------------------------|
| 1      | exp Smoking/                                                                                         |
| 2      | exp "Tobacco Use Disorder"/                                                                          |
| 3      | Nicotine\$.ab.tl.                                                                                    |
| 4      | Cigarettes\$.ab.tl.                                                                                  |
| 5      | Smok\$.ab.tl.                                                                                        |
| 6      | tobacco\$.ab.tl.                                                                                     |
| 7      | 1 or 2 or 3 or 4 or 5 or 6                                                                           |
| 8      | exp Alcohol Drinking/                                                                                |
| 9      | exp Alcoholism/                                                                                      |
| 10     | exp Drinking Behavior/                                                                               |
| 11     | (Drink\$ adj3 (Behavior\$ or Alcohol\$)).ab.tl.                                                      |
| 12     | Alcoholism\$.ab.tl.                                                                                  |
| 13     | alcohol\$.ab.tl.                                                                                     |
| 14     | (alcohol\$ adj3 (dependen\$ or disorder\$ or drink\$ or misuse<br>or abuse\$ or consumption)).ab.tl. |
| 15     | 8 or 9 or 10 or 11 or 12 or 13 or 14                                                                 |
| 16     | 7 or 15                                                                                              |
| 17     | exp Fractures, Bone/                                                                                 |
| 18     | Broken Bone\$.ab.tl.                                                                                 |
| 19     | Bone Fracture\$.ab.tl.                                                                               |
| 20     | Spiral Fracture\$.ab.tl.                                                                             |
| 21     | Torsion Fracture\$.ab.tl.                                                                            |
| 22     | exp Fracture Fixation/                                                                               |
| 23     | Fracture Fixation\$.ab.tl.                                                                           |
| 24     | Skeletal Fixation\$.ab.tl.                                                                           |
| 25     | Fracture Reduction\$.ab.tl.                                                                          |
| 26     | exp Fracture Healing/                                                                                |
| 27     | (fractur\$ adj3 healing).ab.tl.                                                                      |
| 28     | (non?union or nonunion or un?united or ununited or delayed?union<br>or union or malunion).ab.tl.     |
| 29     | exp Surgical Wound Infection/                                                                        |
| 30     | Surgical Wound Infection\$.ab.tl.                                                                    |
| 31     | Surgical Site Infection\$.ab.tl.                                                                     |
| 32     | Postoperative Wound Infection\$.ab.tl.                                                               |
| 33     | (superficial adj2 SSI\$.ab.tl.                                                                       |
| 34     | (deep adj2 SSI\$.ab.tl.                                                                              |
| 35     | (Organ adj space SSI\$.ab.tl.                                                                        |
| 36     | or/1 7-35                                                                                            |
| 37     | 16 and 36                                                                                            |
| 38     | limit 37 to humans                                                                                   |

texts will be read along with the reasons for exclusion would be provided.

**3.4.3. Data collection process.** Two authors will independently perform data extraction from eligible studies using a standardized form. Disagreement will be resolved based on mutual discussion with each other or by the third reviewer. In the case of uncertainties, we will contact the original investigators for resolving the issue.

**3.4.4. Data items.** The data that will be extracted are:

1. basic characteristics of the studies (first author, journal name, publication year, group, study design, etc);
2. characteristics of the participants (sex, age, race, BMI, height, weight, and fracture location, etc);
3. other factors that may slow bone healing time (diabetes, use of nonsteroidal anti-inflammatory drugs [NSAIDs], and fluoroquinolone family of antibiotics)<sup>(32)</sup>;

4. exposure details (treatment, smoking type [e.g., cigarette, cigar, and waterpipe], smoking dose, alcohol type [e.g., beer, wine, and spirits], and level of alcohol consumption); and
5. outcome measures (sample sizes, delayed union and nonunion rate, time to union, and complications during bone healing, etc).

Current smokers are defined as participants who smoke at least 10 cigarettes per day for the past 1 year and never smokers are participants who did not smoke during the past year and smoked <100 cigarettes during their lifetime.<sup>(33)</sup> Alcohol intake will be converted into grams per day based on the standard drink size (1 mL=0.8g, 1 oz=28.35 g, 1 drink=14g, and 1 unit=7.9 g). And level of alcohol drinking will be classified into light (<7g/day), moderate (7–14 g/day), heavy (>14 g/day), and binge drinking (28–35 g/day).<sup>(34)</sup> Never drinker is defined as participants with no alcohol consumption within the preceding 12 months.<sup>(35)</sup> Current drinker is defined as participants who drank alcohol within the past 12 months.

Regarding missing data of eligible studies, we will contact the original authors. Also, reminder emails will be sent twice at most within a period of 8 weeks and will wait for the next 12 weeks at the maximum for the reply.

**3.5. Outcomes and prioritization**

The primary outcomes comprise of delayed union or nonunion rate and time to union. Delayed union and nonunion are diagnosed when the time frame for fracture union is from 3 to 6 months and generally over 9 months, respectively, which varies based on fracture location and the level of soft-tissue related injury.<sup>(21)</sup> Time to union is defined as the time from initiation of bone fracture to the occurrence of clinical union (stabilization of fracture site and painlessness) and radiographic union (trabecular or cortical bone crosses the fracture site).<sup>(32)</sup> Secondary outcomes include common complications occurring during bone healing including malunion rate and wound infection rate.<sup>(36)</sup> Malunion is defined as a fracture that is not anatomically healed. Wound infection is defined as infection, which is probably related to operation, occurring within 30 days after the operation when there is no implant left or within 1 year when there is implant left in surgical site.<sup>(37)</sup>

The hypothesis is that outcomes of RCTs and cohort studies might be similar to case-control and cross-sectional studies.

**3.6. Methodological quality assessment of individual studies**

Two authors will independently evaluate the risk of bias in each included study using the Quality In Prognosis Studies (QUIPS) tool for quality assessment of RCT, cohort study, case-control study, and cross-sectional study. In total, representativeness of the study sample (study participants domain), whether participants with follow-up data represent persons enrolled in the study (study attrition domain), adequacy of prognostic factor measurement (prognostic factor measurement domain), the adequacy of outcome measurement (outcome measurement domain), potential confounding factors (study confounding domain), and the appropriateness of the study's statistical analysis and completeness of reporting (statistical analysis and reporting domain) will be assessed for each study. Studies will be classified into low, moderate, and high risk of bias according to the results.



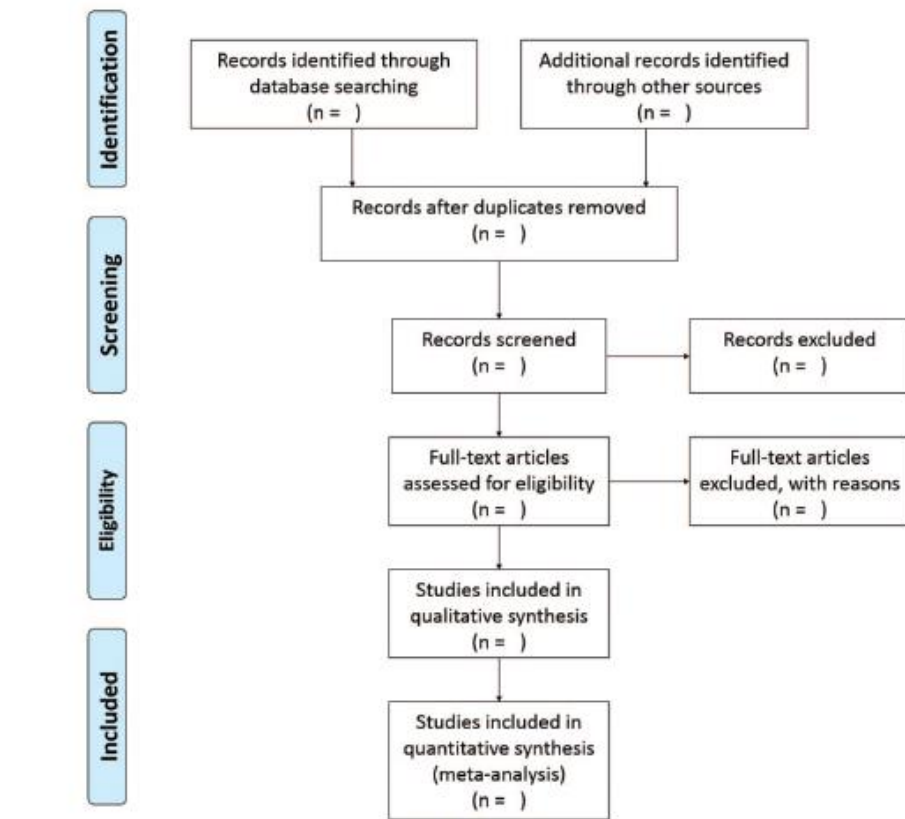

Figure 1. PRISMA flow diagram.

Any controversy during assessment will be managed via discussion or consulting the third author. The results of risk of bias of each study will be shown in a table form.

**3.7. Assessment of heterogeneity**

We will assess statistical heterogeneity between studies by calculating  $I^2$  value by adhering to the Cochrane Handbook for Systematic Reviews of Interventions.<sup>[31]</sup> Value of  $I^2$  larger than 75% means considerable statistical heterogeneity. Data of studies with low statistical heterogeneity, clinical heterogeneity, and methodological heterogeneity will be used for quantitative synthesis.

**3.8. Data synthesis**

If more than 2 studies eligible are included, as data is expected to vary across studies, meta-analysis will be performed using random-effects model<sup>[38]</sup> to combine data of bone healing outcomes with the tools of RevMan 5.3 (Denmark) and R

software 3.6.1 using package “metafor.” For continuous data including the time to union, mean difference (MD) with 95% confident intervals (CIs) will be used to evaluate effect size. Dichotomous data comprising of delayed and nonunion rate and complications will be analyzed using risk ratios (RRs) with 95% CIs. If studies show substantial clinical/methodological heterogeneity or <2 studies are included, quantitative synthesis will not be performed. A narrative review of results will be illustrated. In addition, dose-response meta-analysis will be conducted using generalized least squares for trend estimation. Estimation of linear trends will be assessed using the correlated natural logs of RR across exposure categories. We will test the non-linear trend through restricted cubic spline model.<sup>[39]</sup> The median or mean level of the exposure will be allocated to each relevant exposure category. Calculation of the median will be performed using the midpoint of each category if no available data is acquired. Meta-regression will be performed as follows: age; ratio of male to female; BMI; sample size; use of NSAIDs; use of fluoroquinolone family of antibiotics; and diabetes.

**3.8.1. Subgroup analysis and investigation of heterogeneity.** If the necessary data are available, subgroup analyses will be done comparing RCTs vs. cohort vs. case-control and cross-sectional studies.

For primary outcomes (delayed union or nonunion rate and time to union), sensitivity analyses will be conducted in order to confirm whether our findings are destabilized by factors as follows:

1. studies with low risk of bias and
2. studies performed with no commercial fund assistance.

Results of sensitivity analysis will be presented in a table form.

### 3.9. Publication bias assessment

Publication bias of included studies will be evaluated using funnel plots according to Cochrane Handbook for Systematic Reviews for Interventions<sup>[31]</sup> if more than 10 studies are included.

### 3.10. Grading quality of evidence

Quality of evidence will be assessed by two authors independently using the Grading of Recommendations Assessment, Development and Evaluation (GRADE) system.<sup>[40]</sup> Evidence will be categorized as high, moderate, low, and very low according to study design, risk of bias, inconsistency, indirectness, imprecision, publication bias, magnitude of the effect, dose–response gradient, and confounding bias.

### 3.11. Ethics and dissemination

Ethical approval is not required for this study because data to be used is from published literatures. Our findings will be expected to provide important data support for clinical treatment and prevention. The results of our review will be published in a peer-reviewed scientific journal and presented at international conferences.

### 3.12. Patient and public involvement

No patient was involved in this protocol for systematic review and meta-analysis.

## 4. Discussion

Delayed union and nonunion of non-pathologic bone fracture are major public health problems, that not only reduce quality of life of patients but also increase economic burden of family. To date, only one meta-analysis has evaluated association between smoking and fracture healing. However, search date was May 2015. In addition, no meta-analysis has assessed the effect of alcohol drinking on fracture healing. Moreover, dose–response between smoking, alcohol drinking and fracture healing is still not known. We will perform this systematic review and meta-analysis of the effect of smoking, alcohol drinking on delayed union or nonunion, time to union, malunion and wound infection to provide patients and clinicians high quality evidence on association between them.

### Acknowledgments

We thank PARK Eun-Sun at Seoul National university Medical library for her contribution in developing the search strategy in MEDLINE database via Ovid.

### Author contributions

Conceptualization: Lingxiao Chen, Jae Hyup Lee.

Methodology: Bin Xu, Lingxiao Chen.

Writing – original draft: Bin Xu.

Writing – review & editing: Bin Xu, Lingxiao Chen, Jae Hyup Lee.

Jae Hyup Lee: 0000-0002-2141-0266.

### References

- [1] Donaldson LJ, Reckless IP, Scholes S, et al. The epidemiology of fractures in England. *J Epidemiol Community Health* 2008;62:174–80.
- [2] Weinlein JC, Azar FM, Beary JH, Canale ST. Delayed union and nonunion of fractures. *Campbell's Operative Orthopaedics* 13 ed Philadelphia, PA: Elsevier; 2016;3081–116.
- [3] Antonova E, Le TK, Burge R, et al. Tibia shaft fractures: costly burden of nonunions. *BMC Musculoskelet Disord* 2013;14.
- [4] Dahabreh Z, Calori GM, Kanakaris NK, et al. A cost analysis of treatment of tibial fracture nonunion by bone grafting or bone morphogenetic protein-7. *Int Orthop* 2009;33:1407–14.
- [5] Dahabreh Z, Dimitriou R, Giannoudis PV. Health economics: a cost analysis of treatment of persistent fracture non-unions using bone morphogenetic protein-7. *Injury* 2007;38:371–7.
- [6] Kanakaris NK, Giannoudis PV. The health economics of the treatment of long-bone non-unions. *Injury* 2007;38(Suppl. 2):S77–84.
- [7] Mills LA, Simpson AH. The relative incidence of fracture non-union in the Scottish population (5.17 million): a 5-year epidemiological study. *BMJ Open* 2013;3.
- [8] Chakkalakal DA, Novak JR, Fritz ED, et al. Inhibition of bone repair in a rat model for chronic and excessive alcohol consumption. *Alcohol* 2005;36:201–14.
- [9] Gaston MS, Simpson AHRW. Inhibition of fracture healing. *J Bone Joint Surg Ser B* 2007;89:1553–60.
- [10] Rodrigues AM, Caetano-Lopes J, Vale AC, et al. Smoking is a predictor of worse trabecular mechanical performance in hip fragility fracture patients. *J Bone Miner Metab* 2012;30:692–9.
- [11] Shen GS, Li Y, Zhao G, et al. Cigarette smoking and risk of hip fracture in women: a meta-analysis of prospective cohort studies. *Injury* 2015;46:1333–40.
- [12] Wu ZJ, Zhao P, Liu B, et al. Effect of cigarette smoking on risk of hip fracture in men: a meta-analysis of 14 prospective cohort studies. *PLoS One* 2016;11:e0168990.
- [13] Pearson RG, Clement RG, Edwards KL, et al. Do smokers have greater risk of delayed and non-union after fracture, osteotomy and arthrodesis? A systematic review with meta-analysis. *BMJ Open* 2016;6:e010303.
- [14] Castillo RC, Bosse MJ, MacKenzie EJ, et al. Impact of smoking on fracture healing and risk of complications in limb-threatening open tibia fractures. *J Orthop Trauma* 2005;19:151–7.
- [15] Hernigou J, Schuind F. Smoking as a predictor of negative outcome in diaphyseal fracture healing. *Int Orthop* 2013;37:883–7.
- [16] Sorensen LT. Wound healing and infection in surgery: the clinical impact of smoking and smoking cessation: a systematic review and meta-analysis. *Arch Surg* 2012;147:373–83.
- [17] Kortram K, Benzarosti H, Metsemakers WJ, et al. Risk factors for infectious complications after open fractures: a systematic review and meta-analysis. *Int Orthop* 2017;41:1965–82.
- [18] Chang W, Lv H, Feng C, et al. Preventable risk factors of mortality after hip fracture surgery: systematic review and meta-analysis. *Int J Surg* 2018;52:320–8.
- [19] Solbakken SM, Meyer HE, Strigum H, et al. Excess mortality following hip fracture: impact of self-perceived health, smoking, and body mass index. A NOREPOS study. *Osteoporos Int* 2017;28:881–7.
- [20] Ma L, Zheng LW, Cheung LK. Influence of nicotine on blood perfusion and bone healing during distraction osteogenesis. *Ann R Australas Coll Dent Surg* 2008;19:52–4.
- [21] Boesmueller S, Wech M, Gregori M, et al. Risk factors for humeral head necrosis and non-union after plating in proximal humeral fractures. *Injury* 2016;47:350–5.
- [22] Zhang X, Yu Z, Yu M, et al. Alcohol consumption and hip fracture risk. *Osteoporos Int* 2015;26:531–42.
- [23] Berg KM, Kunins HV, Jackson JL, et al. Association between a alcohol consumption and both osteoporotic fracture and bone density. *Am J Med* 2008;121:406–18.

- [24] Sogaard AJ, Ranhoff AH, Meyer HE, et al. The association between alcohol consumption and risk of hip fracture differs by age and gender in Cohort of Norway: a NOREPOS study. *Osteoporos Int* 2018;29:2457–67.
- [25] Chrcanovic BR. Factors influencing the incidence of maxillofacial fractures. *Oral Maxillofac Surg* 2012;16:3–17.
- [26] Shao J, Zhang H, Yin B, et al. Risk factors for surgical site infection following operative treatment of ankle fractures: a systematic review and meta-analysis. *Int J Surg* 2018;56:124–32.
- [27] Natoli RM, Yu H, Meislin MC, et al. Alcohol exposure decreases osteopontin expression during fracture healing and osteopontin-mediated mesenchymal stem cell migration in vitro. *J Orthop Surg Res* 2018;13:101.
- [28] Roper PM, Abbasnia P, Vuchkowska A, et al. Alcohol-related deficient fracture healing is associated with activation of FoxO transcription factors in mice. *J Orthop Res* 2016;34:2106–15.
- [29] Moher D, Shamseer L, Clarke M, et al. Preferred reporting items for systematic review and meta-analysis protocols (PRISMA-P) 2015 statement. *System Rev* 2015;4:1.
- [30] Stroup DF, Berlin JA, Morton SC, et al. Meta-analysis of observational studies in epidemiology: a proposal for reporting. Meta-analysis of Observational Studies in Epidemiology (MOOSE) group. *JAMA* 2000;283:2008–12.
- [31] Higgins JP, Green S. *Cochrane Handbook for Systematic Reviews of Interventions*. Hoboken, NJ: John Wiley & Sons; 2011.
- [32] Whittle AP, Azar FM, Besty JH, Canale ST. *General principles of fracture treatment*. *Campbell's Operative Orthopaedics* 13 ed Philadelphia, PA: Elsevier; 2016;2656–711.
- [33] Weywadt CR, Kiehl KA, Claus ED. Neural correlates of response inhibition in current and former smokers. *Behav Brain Res* 2017;319:207–18.
- [34] Cha BH, Jang MJ, Lee SH. Alcohol consumption can reduce the risk of gallstone disease: a systematic review with a dose-response meta-analysis of case-control and cohort studies. *Gut Liver* 2019;13:114–31.
- [35] Dakhoul L, Ghabril M, Gu J, et al. Heavy consumption of alcohol is not associated with worse outcomes in patients with idiosyncratic drug-induced liver injury compared to non-drinkers. *Clin Gastroenterol Hepatol* 2018;16:722–9.e722.
- [36] Stannard JP, Schmidt AH, Kregor PJ. *Surgical Treatment of Orthopaedic Trauma*. 1 ed New York: Thieme; 2007.
- [37] Mangram AJ, Horan TC, Pearson ML, et al. Guideline for prevention of surgical site infection, 1999. Centers for Disease Control and Prevention (CDC) Hospital Infection Control Practices Advisory Committee. *Am J Infect Control* 1999;27:97–132. quiz 133–134; discussion 196.
- [38] Borenstein M, V Hedges L, PT Higgins J, et al. *Introduction to Meta-Analysis*. Chichester, UK: John Wiley & Sons; 2009.
- [39] Orsini N, Li R, Wolk A, et al. Meta-analysis for linear and nonlinear dose-response relations: examples, an evaluation of approximations, and software. *Am J Epidemiol* 2012;175:66–73.
- [40] Schünemann H, Brożek J, Guyatt G, et al. *Handbook for Grading the Quality of Evidence and the Strength of Recommendations Using the GRADE Approach*. Updated October 2013. Available at <https://gdt.grade.org/app/handbook/handbook.html>. Accessed April 20, 2019.

1 **Appendix S2. Search strategies on electronic databases**

2 A detailed search strategy was shown in **Appendix S2** as follows:

3 (1) Search strategy concerning the impacts of smoking and alcohol consumption on fracture healing, surgical site  
4 infection (SSI), and malunion was conducted for the initial search (**Appendices S2.1.1a to e**), the first updated  
5 search (**Appendices S2.1.2a to e**), the second updated search (**Appendices S2.1.3a to e**), and the third updated  
6 search (**Appendices S2.1.4a to e**).

7 (2) Search strategy concerning the impacts of preoperative smoking cessation time, nicotine replacement therapy  
8 (NRT), and vaping on fracture healing, SSI, and malunion were conducted for the initial search (**Appendices**  
9 **S2.2.1a to e**) and the updated search (**Appendices S2.2.2a to e**).

10 (3) Search strategies concerning the impacts of preoperative smoking cessation time, NRT, and vaping on bone  
11 healing were conducted for the initial search (**Appendices S2.3.1a to e**) and the updated search (**Appendices**  
12 **S2.3.2a to e**).

13 (4) Search strategies concerning the impacts of preoperative smoking cessation time, NRT, and vaping on wound  
14 healing and wound complications were conducted for the initial search (**Appendices S2.4.1a to e**) and the up  
15 dated search (**Appendices S2.4.2a to e**).

16 **S2.1. Search strategies for the impacts of smoking and alcohol consumption on fracture healing, s**  
17 **urgical site infection, and malunion**

18 **S2.1.1. The first search strategy**

19 **S2.1.1a. MEDLINE database (inception of database to October 2<sup>nd</sup>, 2019)**

| #  | Searches                                                                                          | Results |
|----|---------------------------------------------------------------------------------------------------|---------|
| 1  | exp Smoking/                                                                                      | 142,448 |
| 2  | exp "Tobacco Use Disorder"/                                                                       | 10,822  |
| 3  | Nicotine\$.ab,ti.                                                                                 | 38,488  |
| 4  | Cigarette\$.ab,ti.                                                                                | 68,089  |
| 5  | Smok\$.ab,ti.                                                                                     | 266,275 |
| 6  | tobacco\$.ab,ti.                                                                                  | 94,768  |
| 7  | 1 or 2 or 3 or 4 or 5 or 6                                                                        | 367,986 |
| 8  | exp Alcohol Drinking/                                                                             | 66,263  |
| 9  | exp Alcoholism/                                                                                   | 73,662  |
| 10 | exp Drinking Behavior/                                                                            | 72,625  |
| 11 | (Dr?nk\$ adj3 (Behavior\$ or Alcohol\$)).ab,ti.                                                   | 22,655  |
| 12 | Alcoholism\$.ab,ti.                                                                               | 26,529  |
| 13 | alcoholic\$.ab,ti.                                                                                | 61,238  |
| 14 | (alcohol\$ adj3 (dependen\$ or disorder\$ or drink\$ or misuse or abuse\$ or consumption)).ab,ti. | 93,190  |
| 15 | 8 or 9 or 10 or 11 or 12 or 13 or 14                                                              | 218,381 |
| 16 | 7 or 15                                                                                           | 547,380 |
| 17 | exp Fractures, Bone/                                                                              | 177,976 |
| 18 | Broken Bone\$.ab,ti.                                                                              | 268     |



|    |                                                                                                                |         |
|----|----------------------------------------------------------------------------------------------------------------|---------|
| 19 | Bone Fracture\$.ab,ti.                                                                                         | 9,706   |
| 20 | Spiral Fracture\$.ab,ti.                                                                                       | 338     |
| 21 | Torsion Fracture\$.ab,ti.                                                                                      | 42      |
| 22 | exp Fracture Fixation/                                                                                         | 59,384  |
| 23 | Fracture Fixation\$.ab,ti.                                                                                     | 3,009   |
| 24 | Skeletal Fixation\$.ab,ti.                                                                                     | 522     |
| 25 | Fracture Reduction\$.ab,ti.                                                                                    | 2,262   |
| 26 | exp Fracture Healing/                                                                                          | 12,813  |
| 27 | (fractur\$ adj3 healing).ab,ti.                                                                                | 9,296   |
| 28 | (non?union or nonunion or un?united or ununited or delayed?union or union or malunion).ab,ti.                  | 57,940  |
| 29 | exp Surgical Wound Infection/                                                                                  | 35,173  |
| 30 | Surgical Wound Infection\$.ab,ti.                                                                              | 1,270   |
| 31 | Surgical Site Infection\$.ab,ti.                                                                               | 9,621   |
| 32 | Postoperative Wound Infection\$.ab,ti.                                                                         | 1,589   |
| 33 | (superficial adj2 SSI\$).ab,ti.                                                                                | 310     |
| 34 | (deep adj2 SSI\$).ab,ti.                                                                                       | 320     |
| 35 | (Organ adj space SSI\$).ab,ti.                                                                                 | 223     |
| 36 | 17 or 18 or 19 or 20 or 21 or 22 or 23 or 24 or 25 or 26 or 27 or 28 or 29 or 30 or 31 or 32 or 33 or 34 or 35 | 276,386 |
| 37 | 16 and 36                                                                                                      | 4,614   |
| 38 | limit 37 to humans                                                                                             | 4,120   |

1

2 **S2.1.1b. EMBASE database (inception of database to October 2<sup>nd</sup>, 2019)**

| No. | Query                                                                                                                             | Results |
|-----|-----------------------------------------------------------------------------------------------------------------------------------|---------|
| #38 | #37 AND 'human'/de                                                                                                                | 10,159  |
| #37 | #16 AND #36                                                                                                                       | 11,029  |
| #36 | #17 OR #18 OR #19 OR #20 OR #21 OR #22 OR #23 OR #24 OR #25 OR #26 OR #27 OR #28 OR #29 OR #30 OR #31 OR #32 OR #33 OR #34 OR #35 | 439,010 |
| #35 | (organ NEAR/1 'space ssi*'):ab,ti                                                                                                 | 435     |
| #34 | (deep NEAR/2 ssi*):ab,ti                                                                                                          | 557     |
| #33 | (superficial NEAR/2 ssi*):ab,ti                                                                                                   | 571     |
| #32 | postoperative wound infection*:ab,ti                                                                                              | 2,026   |
| #31 | surgical site infection*:ab,ti                                                                                                    | 14,309  |
| #30 | surgical wound infection*:ab,ti                                                                                                   | 1,615   |
| #29 | surgical infection!/exp                                                                                                           | 46,243  |
| #28 | non?union:ab,ti OR nonunion:ab,ti OR un?united:ab,ti OR ununited:ab,ti OR delayed?union:ab,ti OR union:ab,ti OR malunion:ab,ti    | 78,271  |
| #27 | (fractur* NEAR/3 healing):ab,ti                                                                                                   | 11,699  |
| #26 | fracture healing!/exp                                                                                                             | 48,776  |

|     |                                                                                                   |         |
|-----|---------------------------------------------------------------------------------------------------|---------|
| #25 | fracture reduction*:ab,ti                                                                         | 2,707   |
| #24 | skeletal fixation*:ab,ti                                                                          | 614     |
| #23 | fracture fixation*:ab,ti                                                                          | 3,389   |
| #22 | fracture fixation'/exp                                                                            | 88,416  |
| #21 | torsion fracture*:ab,ti                                                                           | 47      |
| #20 | spiral fracture*:ab,ti                                                                            | 391     |
| #19 | bone fracture*:ab,ti                                                                              | 13,397  |
| #18 | broken bone*:ab,ti                                                                                | 359     |
| #17 | fracture'/exp                                                                                     | 310,363 |
| #16 | #7 OR #15                                                                                         | 801,490 |
| #15 | #8 OR #9 OR #10 OR #11 OR #12 OR #13 OR #14                                                       | 291,059 |
| #14 | (alcohol* NEAR/3 (dependen* OR disorder* OR drink* OR misuse OR abuse* OR consumption)):a<br>b,ti | 132,128 |
| #13 | alcoholic*:ab,ti                                                                                  | 93,160  |
| #12 | alcoholism*:ab,ti                                                                                 | 38,539  |
| #11 | (dr?nk* NEAR/3 (behavior* OR alcohol*)):ab,ti                                                     | 31,868  |
| #10 | drinking behavior'/exp                                                                            | 48,683  |
| #9  | alcoholism'/exp                                                                                   | 127,760 |
| #8  | drinking behavior'/exp                                                                            | 48,683  |
| #7  | #1 OR #2 OR #3 OR #4 OR #5 OR #6                                                                  | 494,653 |
| #6  | tobacco*:ab,ti                                                                                    | 114,728 |
| #5  | smok*:ab,ti                                                                                       | 391,841 |
| #4  | cigarette*:ab,ti                                                                                  | 86,692  |
| #3  | nicotine*:ab,ti                                                                                   | 48,682  |
| #2  | tobacco dependence'/exp                                                                           | 20,241  |
| #1  | smoking'/exp                                                                                      | 376,274 |

1

2 **S2.1.1c. Cochrane library database (inception of database to October 10<sup>th</sup>, 2019)**

| ID | Search                                                    | Hits   |
|----|-----------------------------------------------------------|--------|
| #1 | MeSH descriptor: [Smoke] explode all trees                | 385    |
| #2 | MeSH descriptor: [Tobacco Use Disorder] explode all trees | 1,516  |
| #3 | (Nicotine*):ti,ab,kw                                      | 6,366  |
| #4 | (Cigarette*):ti,ab,kw                                     | 7,739  |
| #5 | (Smok*):ti,ab,kw                                          | 34,367 |
| #6 | (tobacco*):ti,ab,kw                                       | 8,119  |
| #7 | #1 or #2 or #3 or #4 or #5 or #6                          | 36,995 |
| #8 | MeSH descriptor: [Alcohol Drinking] explode all trees     | 3,611  |
| #9 | MeSH descriptor: [Alcohols] explode all trees             | 35,871 |

|     |                                                                                                                                   |        |
|-----|-----------------------------------------------------------------------------------------------------------------------------------|--------|
| #10 | MeSH descriptor: [Drinking Behavior] explode all trees                                                                            | 3,736  |
| #11 | ((Dr?nk* near/3 (Behavior* or Alcohol*)):ti,ab,kw                                                                                 | 6,195  |
| #12 | (Alcoholism*):ti,ab,kw                                                                                                            | 6,292  |
| #13 | (alcoholic*):ti,ab,kw                                                                                                             | 6,503  |
| #14 | ((alcohol* near/3 (dependen* or disorder* or drink* or misuse or abuse* or consumption))):ti,ab,kw                                | 13,679 |
| #15 | #8 or #9 or #10 or #11 or #12 or #13 or #14                                                                                       | 53,749 |
| #16 | #7 or #15                                                                                                                         | 86,796 |
| #17 | MeSH descriptor: [Fractures, Bone] explode all trees                                                                              | 5,511  |
| #18 | (Broken Bone*):ti,ab,kw                                                                                                           | 145    |
| #19 | (Bone Fracture*):ti,ab,kw                                                                                                         | 9,830  |
| #20 | (Spiral Fracture*):ti,ab,kw                                                                                                       | 48     |
| #21 | (Torsion Fracture*):ti,ab,kw                                                                                                      | 43     |
| #22 | MeSH descriptor: [Fracture Fixation] explode all trees                                                                            | 1,619  |
| #23 | (Fracture Fixation*):ti,ab,kw                                                                                                     | 3,473  |
| #24 | (Skeletal Fixation*):ti,ab,kw                                                                                                     | 156    |
| #25 | (Fracture Reduction*):ti,ab,kw                                                                                                    | 3,594  |
| #26 | MeSH descriptor: [Fracture Healing] explode all trees                                                                             | 510    |
| #27 | ((fractur* near/3 healing)):ti,ab,kw                                                                                              | 1,386  |
| #28 | ((non?union or nonunion or un?united or united or delayed?union or union or malunion)):ti,ab,kw                                   | 3,127  |
| #29 | MeSH descriptor: [Surgical Wound Infection] explode all trees                                                                     | 3,228  |
| #30 | (Surgical Wound Infection*):ti,ab,kw                                                                                              | 6,595  |
| #31 | (Surgical Site Infection*):ti,ab,kw                                                                                               | 3,147  |
| #32 | (Postoperative Wound Infection*):ti,ab,kw                                                                                         | 5,239  |
| #33 | ((superficial near/2 SSI*)):ti,ab,kw                                                                                              | 90     |
| #34 | ((deep near/2 SSI*)):ti,ab,kw                                                                                                     | 76     |
| #35 | ((Organ near/1 space SSI*)):ti,ab,kw                                                                                              | 82     |
| #36 | #17 or #18 or #19 or #20 or #21 or #22 or #23 or #24 or #25 or #26 or #27 or #28 or #29 or #30 or #31 or #32 or #33 or #34 or #35 | 24,406 |
| #37 | #16 and #36                                                                                                                       | 880    |

1

2 **S2.1.1d. CINAHL database (inception of database to October 10<sup>th</sup>, 2019)**

| #   | Query                                                                                          | Results |
|-----|------------------------------------------------------------------------------------------------|---------|
| S28 | S12 AND S27                                                                                    | 1,272   |
| S27 | S13 or S14 or S15 or S16 or S17 or S18 or S19 or S20 or S21 or S22 or S23 or S24 or S25 or S26 | 39,143  |
| S26 | TI Organ w1 space SSI* or AB Organ w1 space SSI*                                               | 78      |
| S25 | TI deep w2 SSI* or AB deep w2 SSI*                                                             | 126     |
| S24 | TI superficial w2 SSI* or AB superficial w2 SSI*                                               | 115     |

|     |                                                                                                                                                                                          |         |
|-----|------------------------------------------------------------------------------------------------------------------------------------------------------------------------------------------|---------|
| S23 | TI Postoperative Wound Infection* or AB Postoperative Wound Infection*                                                                                                                   | 270     |
| S22 | TI Surgical Site Infection* or AB Surgical Site Infection*                                                                                                                               |         |
| S21 | TI Surgical Wound Infection* or AB Surgical Wound Infection*                                                                                                                             | 310     |
| S20 | (MM "Surgical Wound Infection")                                                                                                                                                          | 6,310   |
| S19 | TI ( non?union or nonunion or un?united or united or delayed?union or union or malunion ) OR AB ( non?union or nonunion or un?united or united or delayed?union or union or malunion )   | 17,200  |
| S18 | TI fractur* w3 healing OR AB fractur* w3 healing                                                                                                                                         | 1,609   |
| S17 | (MM "Fracture Healing")                                                                                                                                                                  | 1,460   |
| S16 | TI Fracture Fixation* or AB Fracture Fixation* or TI Skeletal Fixation* or AB Skeletal Fixation* or TI Fracture Reduction* or AB Fracture Reduction*                                     | 1,806   |
| S15 | (MH "Fracture Fixation+")                                                                                                                                                                | 12,432  |
| S14 | TI Broken Bone* or AB Broken Bone* or TI Bone Fracture* or AB Bone Fracture* or TI Spiral Fracture* or AB Spiral Fracture* or TI Torsion Fracture* or AB Torsion Fracture*               | 2,472   |
| S13 | (MM "Carpal Fractures")                                                                                                                                                                  | 95      |
| S12 | S4 or S11                                                                                                                                                                                | 221,951 |
| S11 | S5 or S6 or S7 or S8 or S9 or S10                                                                                                                                                        | 55,189  |
| S10 | TI ( (alcohol* w3 (dependen* or disorder* or drink* or misuse or abuse* or consumption)) ) OR AB ( (alcohol* w3 (dependen* or disorder* or drink* or misuse or abuse* or consumption)) ) | 29,653  |
| S9  | TI ( Dr?nk* w3 (Behavior* or Alcohol*) ) OR AB ( Dr?nk* w3 (Behavior* or Alcohol*) )                                                                                                     | 6,175   |
| S8  | TI Alcoholism* or AB Alcoholism*                                                                                                                                                         | 4,370   |
| S7  | (MH "Drinking Behavior+")                                                                                                                                                                | 28,839  |
| S6  | (MM "Alcoholism")                                                                                                                                                                        | 10,755  |
| S5  | (MH "Alcohol Drinking+")                                                                                                                                                                 | 27,642  |
| S4  | S1 or S2 or S3                                                                                                                                                                           | 201,263 |
| S3  | TI Nicotine* OR AB Nicotine* OR TI Cigarette* OR AB Cigarette* OR TI Smok* OR AB Smok* OR TI tobacco* OR AB tobacco*                                                                     | 97,194  |
| S2  | (MH "Substance Use Disorders+")                                                                                                                                                          | 146,077 |
| S1  | (MH "Smoking+")                                                                                                                                                                          | 63,985  |

1

2 **S2.1.1e. AMED database via EBSCOhost (inception of database to October 28<sup>th</sup>, 2019)**

| #   | Searches                                                                                | Results |
|-----|-----------------------------------------------------------------------------------------|---------|
| S27 | S10 AND S26                                                                             | 82      |
| S26 | S13 or S14 or S15 or S16 or S17 or S18 or S19 or S20 or S21 or S22 or S23 or S24 or S25 | 1,478   |
| S25 | TI Organ w1 space SSI* or AB Organ w1 space SSI*                                        | 1       |
| S24 | TI Organ w1 space SSI* or AB Organ w1 space SSI*                                        | 0       |
| S23 | TI deep w2 SSI* or AB deep w2 SSI*                                                      | 1       |
| S22 | TI superficial w2 SSI* or AB superficial w2 SSI*                                        | 1       |
| S21 | Postoperative Wound Infection* or AB Postoperative Wound Infection*                     | 10      |
| S20 | Surgical Site Infection* or AB Surgical Site Infection*                                 | 20      |
| S19 | Surgical Wound Infection* or AB Surgical Wound Infection*                               | 9       |



|     |                                                                                                                                                                                     |        |
|-----|-------------------------------------------------------------------------------------------------------------------------------------------------------------------------------------|--------|
| S18 | SU Surgical Wound Infection                                                                                                                                                         | 8      |
| S17 | TI non?union or nonunion or un?united or ununited or delayed?union or union or malunion OR A B non?union or nonunion or un?united or ununited or delayed?union or union or malunion | 1,035  |
| S16 | TI fractur* w3 healing OR AB fractur* w3 healing                                                                                                                                    | 145    |
| S15 | SU Fracture Healing                                                                                                                                                                 | 84     |
| S14 | TI Fracture Fixation* or AB Fracture Fixation* or TI Skeletal Fixation* or AB Skeletal Fixation* or TI Fracture Reduction* or AB Fracture Reduction*                                | 151    |
| S13 | TI Broken Bone* or AB Broken Bone* or TI Bone Fracture* or AB Bone Fracture* or TI Spiral Fracture* or AB Spiral Fracture* or TI Torsion Fracture* or AB Torsion Fracture*          | 159    |
| S12 | SU Fracture Fixation                                                                                                                                                                | 791    |
| S11 | SU Carpal Fractures                                                                                                                                                                 | 0      |
| S10 | S1 or S2 or S3 or S5 or S6 or S7 or S8 or S9                                                                                                                                        | 48,959 |
| S9  | TI alcohol* w3 dependen* or disorder* or drink* or misuse or abuse* or consumption OR AB alcohol* w3 dependen* or disorder* or drink* or misuse or abuse* or consumption            | 46,456 |
| S8  | TI Dr?nk* w3 Behavior* or Alcohol* OR AB Dr?nk* w3 Behavior* or Alcohol*                                                                                                            | 2,430  |
| S7  | TI Alcoholism* or AB Alcoholism*                                                                                                                                                    | 133    |
| S6  | SU Drinking Behavior                                                                                                                                                                | 58     |
| S5  | SU Alcoholism                                                                                                                                                                       | 449    |
| S4  | SU Alcohol Drinking                                                                                                                                                                 | 244    |
| S3  | TI Nicotine* OR AB Nicotine* OR TI Cigarette* OR AB Cigarette* OR TI Smok* OR AB Smok* OR TI tobacco* OR AB tobacco*                                                                | 1,545  |
| S2  | SU Substance Use Disorders                                                                                                                                                          | 163    |
| S1  | SU smoking                                                                                                                                                                          |        |

1

2 **S2.1.2. The second search strategy (the first updated search)**

3 **S2.1.2a. MEDLINE database (year of 2019 to July 7<sup>th</sup>, 2020)**

| #  | Searches                                        | Results |
|----|-------------------------------------------------|---------|
| 1  | exp Smoking/                                    | 146,898 |
| 2  | exp "Tobacco Use Disorder"/                     | 11,185  |
| 3  | Nicotine\$.ab,ti.                               | 40,161  |
| 4  | Cigarette\$.ab,ti.                              | 71,525  |
| 5  | Smok\$.ab,ti.                                   | 279,443 |
| 6  | tobacco\$.ab,ti.                                | 99,356  |
| 7  | 1 or 2 or 3 or 4 or 5 or 6                      | 384,957 |
| 8  | exp Alcohol Drinking/                           | 68,851  |
| 9  | exp Alcoholism/                                 | 74,920  |
| 10 | exp Drinking Behavior/                          | 75,315  |
| 11 | (Dr?nk\$ adj3 (Behavior\$ or Alcohol\$)).ab,ti. | 23,781  |
| 12 | Alcoholism\$.ab,ti.                             | 26,886  |
| 13 | alcoholic\$.ab,ti.                              | 63,894  |

|    |                                                                                                                |         |
|----|----------------------------------------------------------------------------------------------------------------|---------|
| 14 | (alcohol\$ adj3 (dependen\$ or disorder\$ or drink\$ or misuse or abuse\$ or consumption)).ab,ti.              | 97,889  |
| 15 | 8 or 9 or 10 or 11 or 12 or 13 or 14                                                                           | 227,022 |
| 16 | 7 or 15                                                                                                        | 571,108 |
| 17 | exp Fractures, Bone/                                                                                           | 183,577 |
| 18 | Broken Bone\$.ab,ti.                                                                                           | 288     |
| 19 | Bone Fracture\$.ab,ti.                                                                                         | 10,296  |
| 20 | Spiral Fracture\$.ab,ti.                                                                                       | 343     |
| 21 | Torsion Fracture\$.ab,ti.                                                                                      | 42      |
| 22 | exp Fracture Fixation/                                                                                         | 61,391  |
| 23 | Fracture Fixation\$.ab,ti.                                                                                     | 3,236   |
| 24 | Skeletal Fixation\$.ab,ti.                                                                                     | 533     |
| 25 | Fracture Reduction\$.ab,ti.                                                                                    | 2,424   |
| 26 | exp Fracture Healing/                                                                                          | 13,353  |
| 27 | (fractur\$ adj3 healing).ab,ti.                                                                                | 9,839   |
| 28 | (non?union or nonunion or un?united or ununited or delayed?union or union or malunion).ab,ti.                  | 61,320  |
| 29 | exp Surgical Wound Infection/                                                                                  | 36,308  |
| 30 | Surgical Wound Infection\$.ab,ti.                                                                              | 1,304   |
| 31 | Surgical Site Infection\$.ab,ti.                                                                               | 10,730  |
| 32 | Postoperative Wound Infection\$.ab,ti.                                                                         | 1,627   |
| 33 | (superficial adj2 SSI\$).ab,ti.                                                                                | 350     |
| 34 | (deep adj2 SSI\$).ab,ti.                                                                                       | 359     |
| 35 | (Organ adj space SSI\$).ab,ti.                                                                                 | 248     |
| 36 | 17 or 18 or 19 or 20 or 21 or 22 or 23 or 24 or 25 or 26 or 27 or 28 or 29 or 30 or 31 or 32 or 33 or 34 or 35 | 287,122 |
| 37 | 16 and 36                                                                                                      | 4,927   |
| 38 | limit 37 to humans                                                                                             | 4,372   |
| 39 | limit 38 to yr="2019 - 2020"                                                                                   | 274     |

1

2 **S2.1.2b. EMBASE database (year of 2019 to July 9<sup>th</sup>, 2020)**

| No. | Query                                                                                                                             | Results |
|-----|-----------------------------------------------------------------------------------------------------------------------------------|---------|
| #39 | #37 AND 'human'/de AND [2019-2020]/py                                                                                             | 1,230   |
| #38 | #37 AND 'human'/de                                                                                                                | 10,773  |
| #37 | #16 AND #36                                                                                                                       | 11,660  |
| #36 | #17 OR #18 OR #19 OR #20 OR #21 OR #22 OR #23 OR #24 OR #25 OR #26 OR #27 OR #28 OR #29 OR #30 OR #31 OR #32 OR #33 OR #34 OR #35 | 459,247 |
| #35 | (organ NEAR/1 'space ssi*'):ab,ti                                                                                                 | 494     |
| #34 | (deep NEAR/2 ssi*):ab,ti                                                                                                          | 613     |
| #33 | (superficial NEAR/2 ssi*):ab,ti                                                                                                   | 631     |

|     |                                                                                                                                |         |
|-----|--------------------------------------------------------------------------------------------------------------------------------|---------|
| #32 | postoperative wound infection*:ab,ti                                                                                           | 2085    |
| #31 | surgical site infection*:ab,ti                                                                                                 | 15,840  |
| #30 | surgical wound infection*:ab,ti                                                                                                | 1,666   |
| #29 | surgical infection!/exp                                                                                                        | 49,452  |
| #28 | non?union:ab,ti OR nonunion:ab,ti OR un?united:ab,ti OR ununited:ab,ti OR delayed?union:ab,ti OR union:ab,ti OR malunion:ab,ti | 81,831  |
| #27 | (fractur* NEAR/3 healing):ab,ti                                                                                                | 12,370  |
| #26 | fracture healing!/exp                                                                                                          | 51,122  |
| #25 | fracture reduction*:ab,ti                                                                                                      | 2,903   |
| #24 | skeletal fixation*:ab,ti                                                                                                       | 628     |
| #23 | fracture fixation*:ab,ti                                                                                                       | 3,632   |
| #22 | fracture fixation!/exp                                                                                                         | 91,629  |
| #21 | torsion fracture*:ab,ti                                                                                                        | 47      |
| #20 | spiral fracture*:ab,ti                                                                                                         | 397     |
| #19 | bone fracture*:ab,ti                                                                                                           | 14,168  |
| #18 | broken bone*:ab,ti                                                                                                             | 380     |
| #17 | fracture!/exp                                                                                                                  | 324,200 |
| #16 | #7 OR #15                                                                                                                      | 838,072 |
| #15 | #8 OR #9 OR #10 OR #11 OR #12 OR #13 OR #14                                                                                    | 302,502 |
| #14 | (alcohol* NEAR/3 (dependen* OR disorder* OR drink* OR misuse OR abuse* OR consumption)):a<br>b,ti                              | 137,940 |
| #13 | alcoholic*:ab,ti                                                                                                               | 97,491  |
| #12 | alcoholism*:ab,ti                                                                                                              | 39,109  |
| #11 | (dr?nk* NEAR/3 (behavior* OR alcohol*)):ab,ti                                                                                  | 33,227  |
| #10 | drinking behavior!/exp                                                                                                         | 50,107  |
| #9  | alcoholism!/exp                                                                                                                | 130,661 |
| #8  | drinking behavior!/exp                                                                                                         | 50,107  |
| #7  | #1 OR #2 OR #3 OR #4 OR #5 OR #6                                                                                               | 587,909 |
| #6  | tobacco*:ab,ti                                                                                                                 | 120,232 |
| #5  | smok*:ab,ti                                                                                                                    | 411,994 |
| #4  | cigarette*:ab,ti                                                                                                               | 90,733  |
| #3  | nicotine*:ab,ti                                                                                                                | 50,667  |
| #2  | tobacco dependence!/exp                                                                                                        | 21,177  |
| #1  | smoking!/exp                                                                                                                   | 391,649 |

1

2 **S2.1.2c. Cochrane library database (year of 2019 to July 9<sup>th</sup>, 2020)**

| ID | Search                                                    | Hits  |
|----|-----------------------------------------------------------|-------|
| #1 | MeSH descriptor: [Smoke] explode all trees                | 389   |
| #2 | MeSH descriptor: [Tobacco Use Disorder] explode all trees | 1,659 |

|     |                                                                                                                                   |        |
|-----|-----------------------------------------------------------------------------------------------------------------------------------|--------|
| #3  | (Nicotine*):ti,ab,kw                                                                                                              | 6,902  |
| #4  | (Cigarette*):ti,ab,kw                                                                                                             | 8,087  |
| #5  | (Smok*):ti,ab,kw                                                                                                                  | 35,554 |
| #6  | (tobacco*):ti,ab,kw                                                                                                               | 8,744  |
| #7  | #1 or #2 or #3 or #4 or #5 or #6                                                                                                  | 38,345 |
| #8  | MeSH descriptor: [Alcohol Drinking] explode all trees                                                                             | 3,778  |
| #9  | MeSH descriptor: [Alcohols] explode all trees                                                                                     | 37,334 |
| #10 | MeSH descriptor: [Drinking Behavior] explode all trees                                                                            | 3,911  |
| #11 | ((Dr?nk* near/3 (Behavior* or Alcohol*))) :ti,ab,kw                                                                               | 6,624  |
| #12 | (Alcoholism*):ti,ab,kw                                                                                                            | 6,571  |
| #13 | (alcoholic*):ti,ab,kw                                                                                                             | 6,897  |
| #14 | ((alcohol* near/3 (dependen* or disorder* or drink* or misuse or abuse* or consumption))) :ti,ab,kw                               | 14,293 |
| #15 | #8 or #9 or #10 or #11 or #12 or #13 or #14                                                                                       | 55,979 |
| #16 | #7 or #15                                                                                                                         | 90,320 |
| #17 | MeSH descriptor: [Fractures, Bone] explode all trees                                                                              | 5,913  |
| #18 | (Broken Bone*):ti,ab,kw                                                                                                           | 163    |
| #19 | (Bone Fracture*):ti,ab,kw                                                                                                         | 10,221 |
| #20 | (Spiral Fracture*):ti,ab,kw                                                                                                       | 50     |
| #21 | (Torsion Fracture*):ti,ab,kw                                                                                                      | 44     |
| #22 | MeSH descriptor: [Fracture Fixation] explode all trees                                                                            | 1,689  |
| #23 | (Fracture Fixation*):ti,ab,kw                                                                                                     | 3,637  |
| #24 | (Skeletal Fixation*):ti,ab,kw                                                                                                     | 159    |
| #25 | (Fracture Reduction*):ti,ab,kw                                                                                                    | 3,742  |
| #26 | MeSH descriptor: [Fracture Healing] explode all trees                                                                             | 522    |
| #27 | ((fractur* near/3 healing)):ti,ab,kw                                                                                              | 1,422  |
| #28 | ((non?union or nonunion or un?united or ununited or delayed?union or union or malunion)):ti,ab,kw                                 | 3,168  |
| #29 | MeSH descriptor: [Surgical Wound Infection] explode all trees                                                                     | 3,372  |
| #30 | (Surgical Wound Infection*):ti,ab,kw                                                                                              | 6,892  |
| #31 | (Surgical Site Infection*):ti,ab,kw                                                                                               | 3,376  |
| #32 | (Postoperative Wound Infection*):ti,ab,kw                                                                                         | 5,404  |
| #33 | ((superficial near/2 SSI*)):ti,ab,kw                                                                                              | 101    |
| #34 | ((deep near/2 SSI*)):ti,ab,kw                                                                                                     | 76     |
| #35 | ((Organ near/1 space SSI*)):ti,ab,kw                                                                                              | 80     |
| #36 | #17 or #18 or #19 or #20 or #21 or #22 or #23 or #24 or #25 or #26 or #27 or #28 or #29 or #30 or #31 or #32 or #33 or #34 or #35 | 25,399 |
| #37 | #16 and #36 with Publication Year from 2019 to 2020, in Trials                                                                    | 124    |

1

2 **S2.1.2d. CINAHL database (year of 2019 to July 8<sup>th</sup>, 2020)**



| #   | Query                                                                                                                                                                                      | Results |
|-----|--------------------------------------------------------------------------------------------------------------------------------------------------------------------------------------------|---------|
| S28 | S12 AND S27 (Limiters - Published Date: 20190101-20200731)                                                                                                                                 | 179     |
| S27 | S13 or S14 or S15 or S16 or S17 or S18 or S19 or S20 or S21 or S22 or S23 or S24 or S25 or S26                                                                                             | 48,593  |
| S26 | TI Organ w1 space SSI* or AB Organ w1 space SSI*                                                                                                                                           | 92      |
| S25 | TI deep w2 SSI* or AB deep w2 SSI*                                                                                                                                                         | 157     |
| S24 | TI superficial w2 SSI* or AB superficial w2 SSI*                                                                                                                                           | 139     |
| S23 | TI Postoperative Wound Infection* or AB Postoperative Wound Infection*                                                                                                                     | 307     |
| S22 | TI Surgical Site Infection* or AB Surgical Site Infection*                                                                                                                                 | 5,547   |
| S21 | TI Surgical Wound Infection* or AB Surgical Wound Infection*                                                                                                                               | 352     |
| S20 | (MM "Surgical Wound Infection")                                                                                                                                                            | 7,317   |
| S19 | TI ( non?union or nonunion or un?united or ununited or delayed?union or union or malunion ) OR AB ( non?union or nonunion or un?united or ununited or delayed?union or union or malunion ) | 22,293  |
| S18 | TI fractur* w3 healing OR AB fractur* w3 healing                                                                                                                                           | 2,016   |
| S17 | (MM "Fracture Healing")                                                                                                                                                                    | 1,735   |
| S16 | TI Fracture Fixation* or AB Fracture Fixation* or TI Skeletal Fixation* or AB Skeletal Fixation* or TI Fracture Reduction* or AB Fracture Reduction*                                       | 2,257   |
| S15 | (MH "Fracture Fixation+")                                                                                                                                                                  | 15,001  |
| S14 | TI Broken Bone* or AB Broken Bone* or TI Bone Fracture* or AB Bone Fracture* or TI Spiral Fracture* or AB Spiral Fracture* or TI Torsion Fracture* or AB Torsion Fracture*                 | 3,089   |
| S13 | (MM "Carpal Fractures")                                                                                                                                                                    | 136     |
| S12 | S4 or S11                                                                                                                                                                                  | 269,169 |
| S11 | S5 or S6 or S7 or S8 or S9 or S10                                                                                                                                                          | 67,779  |
| S10 | TI ( (alcohol* w3 (dependen* or disorder* or drink* or misuse or abuse* or consumption)) ) OR AB ( (alcohol* w3 (dependen* or disorder* or drink* or misuse or abuse* or consumption)) )   | 37,601  |
| S9  | TI ( Dr?nk* w3 (Behavior* or Alcohol*) ) OR AB ( Dr?nk* w3 (Behavior* or Alcohol*) )                                                                                                       | 7,855   |
| S8  | TI Alcoholism* or AB Alcoholism*                                                                                                                                                           | 5,596   |
| S7  | (MH "Drinking Behavior+")                                                                                                                                                                  | 34,887  |
| S6  | (MM "Alcoholism")                                                                                                                                                                          | 12,779  |
| S5  | (MH "Alcohol Drinking+")                                                                                                                                                                   | 33,405  |
| S4  | S1 or S2 or S3                                                                                                                                                                             | 243,891 |
| S3  | TI Nicotine* OR AB Nicotine* OR TI Cigarette* OR AB Cigarette* OR TI Smok* OR AB Smok* OR TI tobacco* OR AB tobacco*                                                                       | 119,053 |
| S2  | (MH "Substance Use Disorders+")                                                                                                                                                            | 176,155 |
| S1  | (MH "Smoking+")                                                                                                                                                                            | 76,503  |

1

2

### S2.1.2e. AMED database via Ovid (inception of database to July 10<sup>th</sup>, 2020)

| # | Searches                                             | Results |
|---|------------------------------------------------------|---------|
| 1 | exp smoking/                                         | 624     |
| 2 | (Nicotine* OR Cigarette* OR Smok* OR tobacco*).ab,ti | 1,622   |
| 3 | exp Alcohol Drinking/                                | 249     |

|    |                                                                                                                      |        |
|----|----------------------------------------------------------------------------------------------------------------------|--------|
| 4  | exp Alcoholism/                                                                                                      | 384    |
| 5  | exp Drinking Behavior/                                                                                               | 303    |
| 6  | Alcoholism*.ab,ti                                                                                                    | 137    |
| 7  | (Dr?nk* adj3 Behavior* or Behavior* adj3 Dr?nk* or Alcohol*).ab,ti                                                   | 1,903  |
| 8  | (alcohol* adj3 dependen* or dependen* adj3 alcohol* or disorder* or drink* or misuse or abuse* or consumption).ab,ti | 18,874 |
| 9  | 1 or 2 or 3 or 4 or 5 or 6 or 7 or 8                                                                                 | 21,435 |
| 10 | exp Fracture Fixation/                                                                                               | 812    |
| 11 | (Broken Bone* or Bone Fracture* or Spiral Fracture* or Torsion Fracture*).ab,ti                                      | 141    |
| 12 | (Fracture Fixation* or Skeletal Fixation* or Fracture Reduction*).ab,ti                                              | 152    |
| 13 | exp Fracture Healing/                                                                                                | 88     |
| 14 | (fractur* adj3 healing or healing adj3 fractur*).ab,ti                                                               | 204    |
| 15 | (non?union or nonunion or un?united or ununited or delayed?union or union or malunion).ab,ti                         | 1,010  |
| 16 | Surgical Wound Infection*.ab,ti                                                                                      | 1      |
| 17 | Surgical Site Infection*.ab,ti                                                                                       | 24     |
| 18 | Postoperative Wound Infection*.ab,ti                                                                                 | 10     |
| 19 | (superficial adj2 SSI* or SSI* adj2 superficial).ab,ti                                                               | 1      |
| 20 | (deep adj2 SSI* or SSI* adj2 deep).ab,ti                                                                             | 1      |
| 21 | (Organ adj1 space SSI* or space adj1 Organ SSI*).ab,ti                                                               | 0      |
| 22 | 10 or 11 or 12 or 13 or 14 or 15 or 16 or 17 or 18 or 19 or 20 or 21                                                 | 2,066  |
| 23 | 9 and 22                                                                                                             | 98     |

1

2 **S2.1.3. The third search strategy (the second updated search)**

3 **S2.1.3a. MEDLINE database (year of 2020 to October 14<sup>th</sup>, 2020)**

| #  | Searches                                        | Results |
|----|-------------------------------------------------|---------|
| 1  | exp Smoking/                                    | 148,321 |
| 2  | exp "Tobacco Use Disorder"/                     | 11,297  |
| 3  | Nicotine\$.ab,ti.                               | 42,140  |
| 4  | Cigarette\$.ab,ti.                              | 75,518  |
| 5  | Smok\$.ab,ti.                                   | 297,163 |
| 6  | tobacco\$.ab,ti.                                | 105,720 |
| 7  | 1 or 2 or 3 or 4 or 5 or 6                      | 407,028 |
| 8  | exp Alcohol Drinking/                           | 69,599  |
| 9  | exp Alcoholism/                                 | 75,326  |
| 10 | exp Drinking Behavior/                          | 76,111  |
| 11 | (Dr?nk\$ adj3 (Behavior\$ or Alcohol\$)).ab,ti. | 25,042  |
| 12 | Alcoholism\$.ab,ti.                             | 27,547  |
| 13 | alcoholic\$.ab,ti.                              | 68,264  |

|    |                                                                                                                |         |
|----|----------------------------------------------------------------------------------------------------------------|---------|
| 14 | (alcohol\$ adj3 (dependen\$ or disorder\$ or drink\$ or misuse or abuse\$ or consumption)).ab,ti.              | 103,534 |
| 15 | 8 or 9 or 10 or 11 or 12 or 13 or 14                                                                           | 237,382 |
| 16 | 7 or 15                                                                                                        | 601,585 |
| 17 | exp Fractures, Bone/                                                                                           | 185,240 |
| 18 | Broken Bone\$.ab,ti.                                                                                           | 316     |
| 19 | Bone Fracture\$.ab,ti.                                                                                         | 11,318  |
| 20 | Spiral Fracture\$.ab,ti.                                                                                       | 359     |
| 21 | Torsion Fracture\$.ab,ti.                                                                                      | 42      |
| 22 | exp Fracture Fixation/                                                                                         | 61,987  |
| 23 | Fracture Fixation\$.ab,ti.                                                                                     | 3,625   |
| 24 | Skeletal Fixation\$.ab,ti.                                                                                     | 545     |
| 25 | Fracture Reduction\$.ab,ti.                                                                                    | 2,701   |
| 26 | exp Fracture Healing/                                                                                          | 13,470  |
| 27 | (fractur\$ adj3 healing).ab,ti.                                                                                | 10,579  |
| 28 | (non?union or nonunion or un?united or ununited or delayed?union or union or malunion).ab,ti.                  | 66,703  |
| 29 | exp Surgical Wound Infection/                                                                                  | 36,654  |
| 30 | Surgical Wound Infection\$.ab,ti.                                                                              | 1,356   |
| 31 | Surgical Site Infection\$.ab,ti.                                                                               | 12,043  |
| 32 | Postoperative Wound Infection\$.ab,ti.                                                                         | 1,699   |
| 33 | (superficial adj2 SSI\$.ab,ti.                                                                                 | 387     |
| 34 | (deep adj2 SSI\$.ab,ti.                                                                                        | 401     |
| 35 | (Organ adj space SSI\$.ab,ti.                                                                                  | 274     |
| 36 | 17 or 18 or 19 or 20 or 21 or 22 or 23 or 24 or 25 or 26 or 27 or 28 or 29 or 30 or 31 or 32 or 33 or 34 or 35 | 297,283 |
| 37 | 16 and 36                                                                                                      | 5,219   |
| 38 | limit 37 to humans                                                                                             | 4,441   |
| 39 | limit 38 to yr="2020 -Current"                                                                                 | 66      |

1

2 **S2.1.3b. EMBASE database (year of 2020 to October 14<sup>th</sup>, 2020)**

| No. | Query                                                                                                                             | Results |
|-----|-----------------------------------------------------------------------------------------------------------------------------------|---------|
| #39 | #37 AND 'human'/de AND [2020-2020]/py                                                                                             | 631     |
| #38 | #37 AND 'human'/de                                                                                                                | 11,063  |
| #37 | #16 AND #36                                                                                                                       | 11,957  |
| #36 | #17 OR #18 OR #19 OR #20 OR #21 OR #22 OR #23 OR #24 OR #25 OR #26 OR #27 OR #28 OR #29 OR #30 OR #31 OR #32 OR #33 OR #34 OR #35 | 467,895 |
| #35 | (organ NEAR/1 'space ssi*'):ab,ti                                                                                                 | 522     |
| #34 | (deep NEAR/2 ssi*):ab,ti                                                                                                          | 645     |
| #33 | (superficial NEAR/2 ssi*):ab,ti                                                                                                   | 659     |
| #32 | postoperative wound infection*:ab,ti                                                                                              | 2,102   |
| #31 | surgical site infection*:ab,ti                                                                                                    | 16,487  |
| #30 | surgical wound infection*:ab,ti                                                                                                   | 1,688   |
| #29 | surgical infection'/exp                                                                                                           | 50,825  |
| #28 | non?union:ab,ti OR nonunion:ab,ti OR un?united:ab,ti OR ununited:ab,ti OR delayed?union:ab,ti OR union:ab,ti OR malunion:ab,ti    | 83,572  |

|     |                                                                                                   |         |
|-----|---------------------------------------------------------------------------------------------------|---------|
| #27 | (fractur* NEAR/3 healing):ab,ti                                                                   | 12,617  |
| #26 | fracture healing'/exp                                                                             | 52,164  |
| #25 | fracture reduction*':ab,ti                                                                        | 2,984   |
| #24 | skeletal fixation*':ab,ti                                                                         | 637     |
| #23 | fracture fixation*':ab,ti                                                                         | 3,731   |
| #22 | fracture fixation'/exp                                                                            | 93,152  |
| #21 | torsion fracture*':ab,ti                                                                          | 47      |
| #20 | spiral fracture*':ab,ti                                                                           | 405     |
| #19 | bone fracture*':ab,ti                                                                             | 14,469  |
| #18 | broken bone*':ab,ti                                                                               | 390     |
| #17 | fracture'/exp                                                                                     | 329,923 |
| #16 | #7 OR #15                                                                                         | 852,882 |
| #15 | #8 OR #9 OR #10 OR #11 OR #12 OR #13 OR #14                                                       | 307,277 |
| #14 | (alcohol* NEAR/3 (dependen* OR disorder* OR drink* OR misuse OR abuse* OR consumption)):a<br>b,ti | 140,628 |
| #13 | alcoholic*':ab,ti                                                                                 | 99,078  |
| #12 | alcoholism*':ab,ti                                                                                | 39,317  |
| #11 | (dr?nk* NEAR/3 (behavior* OR alcohol*)):ab,ti                                                     | 33,928  |
| #10 | drinking behavior'/exp                                                                            | 50,755  |
| #9  | alcoholism'/exp                                                                                   | 131,964 |
| #8  | drinking behavior'/exp                                                                            | 50,755  |
| #7  | #1 OR #2 OR #3 OR #4 OR #5 OR #6                                                                  | 598,937 |
| #6  | tobacco*':ab,ti                                                                                   | 122,564 |
| #5  | smok*':ab,ti                                                                                      | 419,722 |
| #4  | cigarette*':ab,ti                                                                                 | 92,460  |
| #3  | nicotine*':ab,ti                                                                                  | 51,454  |
| #2  | tobacco dependence'/exp                                                                           | 21,484  |
| #1  | smoking'/exp                                                                                      | 397,892 |

1

## 2 S2.1.3c. Cochrane library database (year of 2020 to October 14<sup>th</sup>, 2020)

| ID  | Search                                                                                            | Hits   |
|-----|---------------------------------------------------------------------------------------------------|--------|
| #1  | MeSH descriptor: [Smoke] explode all trees                                                        | 394    |
| #2  | MeSH descriptor: [Tobacco Use Disorder] explode all trees                                         | 1,676  |
| #3  | (Nicotine*):ti,ab,kw                                                                              | 6,980  |
| #4  | (Cigarette*):ti,ab,kw                                                                             | 8,216  |
| #5  | (Smok*):ti,ab,kw                                                                                  | 36,008 |
| #6  | (tobacco*):ti,ab,kw                                                                               | 8,912  |
| #7  | #1 or #2 or #3 or #4 or #5 or #6                                                                  | 38,845 |
| #8  | MeSH descriptor: [Alcohol Drinking] explode all trees                                             | 3,833  |
| #9  | MeSH descriptor: [Alcohols] explode all trees                                                     | 37,500 |
| #10 | MeSH descriptor: [Drinking Behavior] explode all trees                                            | 3,967  |
| #11 | ((Dr?nk* near/3 (Behavior* or Alcohol*)):ti,ab,kw                                                 | 6,660  |
| #12 | (Alcoholism*):ti,ab,kw                                                                            | 6,677  |
| #13 | (alcoholic*):ti,ab,kw                                                                             | 7,034  |
| #14 | ((alcohol* near/3 (dependen* or disorder* or drink* or misuse or abuse* or consumption)):ti,ab,kw | 14,512 |



|     |                                                                                                                                   |        |
|-----|-----------------------------------------------------------------------------------------------------------------------------------|--------|
| #15 | #8 or #9 or #10 or #11 or #12 or #13 or #14                                                                                       | 56,467 |
| #16 | #7 or #15                                                                                                                         | 91,303 |
| #17 | MeSH descriptor: [Fractures, Bone] explode all trees                                                                              | 6,024  |
| #18 | (Broken Bone*):ti,ab,kw                                                                                                           | 167    |
| #19 | (Bone Fracture*):ti,ab,kw                                                                                                         | 10,386 |
| #20 | (Spiral Fracture*):ti,ab,kw                                                                                                       | 50     |
| #21 | (Torsion Fracture*):ti,ab,kw                                                                                                      | 46     |
| #22 | MeSH descriptor: [Fracture Fixation] explode all trees                                                                            | 1,720  |
| #23 | (Fracture Fixation*):ti,ab,kw                                                                                                     | 3,725  |
| #24 | (Skeletal Fixation*):ti,ab,kw                                                                                                     | 165    |
| #25 | (Fracture Reduction*):ti,ab,kw                                                                                                    | 3,833  |
| #26 | MeSH descriptor: [Fracture Healing] explode all trees                                                                             | 529    |
| #27 | ((fractur* near/3 healing)):ti,ab,kw                                                                                              | 1,452  |
| #28 | ((non?union or nonunion or un?united or ununited or delayed?union or union or malunion)):ti,ab,kw                                 | 3,245  |
| #29 | MeSH descriptor: [Surgical Wound Infection] explode all trees                                                                     | 3,403  |
| #30 | (Surgical Wound Infection*):ti,ab,kw                                                                                              | 6,970  |
| #31 | (Surgical Site Infection*):ti,ab,kw                                                                                               | 3,449  |
| #32 | (Postoperative Wound Infection*):ti,ab,kw                                                                                         | 5,473  |
| #33 | ((superficial near/2 SSI*)):ti,ab,kw                                                                                              | 105    |
| #34 | ((deep near/2 SSI*)):ti,ab,kw                                                                                                     | 79     |
| #35 | ((Organ near/1 space SSI*)):ti,ab,kw                                                                                              | 83     |
| #36 | #17 or #18 or #19 or #20 or #21 or #22 or #23 or #24 or #25 or #26 or #27 or #28 or #29 or #30 or #31 or #32 or #33 or #34 or #35 | 25,856 |
| #37 | #16 and #36 with Publication Year from 2020 to 2020, in Trials                                                                    | 32     |

1

2 **S2.1.3d. CINAHL database (year of 2020 to October 14<sup>th</sup>, 2020)**

| #   | Query                                                                                                                                                                                      | Results |
|-----|--------------------------------------------------------------------------------------------------------------------------------------------------------------------------------------------|---------|
| S28 | S12 AND S27 (Limiters - Published Date: 20200101-20201031)                                                                                                                                 | 102     |
| S27 | S13 or S14 or S15 or S16 or S17 or S18 or S19 or S20 or S21 or S22 or S23 or S24 or S25 or S26                                                                                             | 46,735  |
| S26 | TI Organ w1 space SSI* or AB Organ w1 space SSI*                                                                                                                                           | 96      |
| S25 | TI deep w2 SSI* or AB deep w2 SSI*                                                                                                                                                         | 149     |
| S24 | TI superficial w2 SSI* or AB superficial w2 SSI*                                                                                                                                           | 141     |
| S23 | TI Postoperative Wound Infection* or AB Postoperative Wound Infection*                                                                                                                     | 306     |
| S22 | TI Surgical Site Infection* or AB Surgical Site Infection*                                                                                                                                 | 5,397   |
| S21 | TI Surgical Wound Infection* or AB Surgical Wound Infection*                                                                                                                               | 343     |
| S20 | (MM "Surgical Wound Infection")                                                                                                                                                            | 7,127   |
| S19 | TI ( non?union or nonunion or un?united or ununited or delayed?union or union or malunion ) OR AB ( non?union or nonunion or un?united or ununited or delayed?union or union or malunion ) | 21,329  |
| S18 | TI fractur* w3 healing OR AB fractur* w3 healing                                                                                                                                           | 1,946   |
| S17 | (MM "Fracture Healing")                                                                                                                                                                    | 1,719   |
| S16 | TI Fracture Fixation* or AB Fracture Fixation* or TI Skeletal Fixation* or AB Skeletal Fixation* or TI Fracture Reduction* or AB Fracture Reduction*                                       | 2,165   |
| S15 | (MH "Fracture Fixation+")                                                                                                                                                                  | 14,785  |

|     |                                                                                                                                                                                          |         |
|-----|------------------------------------------------------------------------------------------------------------------------------------------------------------------------------------------|---------|
| S14 | TI Broken Bone* or AB Broken Bone* or TI Bone Fracture* or AB Bone Fracture* or TI Spiral Fracture* or AB Spiral Fracture* or TI Torsion Fracture* or AB Torsion Fracture*               | 2,624   |
| S13 | (MM "Carpal Fractures")                                                                                                                                                                  | 111     |
| S12 | S4 or S11                                                                                                                                                                                | 254,671 |
| S11 | S5 or S6 or S7 or S8 or S9 or S10                                                                                                                                                        | 63,107  |
| S10 | TI ( (alcohol* w3 (dependen* or disorder* or drink* or misuse or abuse* or consumption)) ) OR AB ( (alcohol* w3 (dependen* or disorder* or drink* or misuse or abuse* or consumption)) ) | 34,567  |
| S9  | TI ( Dr?nk* w3 (Behavior* or Alcohol*) ) OR AB ( Dr?nk* w3 (Behavior* or Alcohol*) )                                                                                                     | 7,150   |
| S8  | TI Alcoholism* or AB Alcoholism*                                                                                                                                                         | 5,197   |
| S7  | (MH "Drinking Behavior+")                                                                                                                                                                | 32,700  |
| S6  | (MM "Alcoholism")                                                                                                                                                                        | 12,049  |
| S5  | (MH "Alcohol Drinking+")                                                                                                                                                                 | 31,305  |
| S4  | S1 or S2 or S3                                                                                                                                                                           | 230,971 |
| S3  | TI Nicotine* OR AB Nicotine* OR TI Cigarette* OR AB Cigarette* OR TI Smok* OR AB Smok* OR TI tobacco* OR AB tobacco*                                                                     | 113,269 |
| S2  | (MH "Substance Use Disorders+")                                                                                                                                                          | 165,804 |
| S1  | (MH "Smoking+")                                                                                                                                                                          | 72,299  |

1

2 **S2.1.3e. AMED database (year of 2020 to October 14<sup>th</sup>, 2020)**

| #  | Searches                                                                                                             | Results |
|----|----------------------------------------------------------------------------------------------------------------------|---------|
| 1  | exp smoking/                                                                                                         | 629     |
| 2  | (Nicotine* OR Cigarette* OR Smok* OR tobacco*).ab,ti                                                                 | 1,636   |
| 3  | exp Alcohol Drinking/                                                                                                | 249     |
| 4  | exp Alcoholism/                                                                                                      | 388     |
| 5  | exp Drinking Behavior/                                                                                               | 303     |
| 6  | Alcoholism*.ab,ti                                                                                                    | 138     |
| 7  | (Dr?nk* adj3 Behavior* or Behavior* adj3 Dr?nk* or Alcohol*).ab,ti                                                   | 1,927   |
| 8  | (alcohol* adj3 dependen* or dependen* adj3 alcohol* or disorder* or drink* or misuse or abuse* or consumption).ab,ti | 19,152  |
| 9  | 1 or 2 or 3 or 4 or 5 or 6 or 7 or 8                                                                                 | 21,739  |
| 10 | exp Fracture Fixation/                                                                                               | 823     |
| 11 | (Broken Bone* or Bone Fracture* or Spiral Fracture* or Torsion Fracture*).ab,ti                                      | 143     |
| 12 | (Fracture Fixation* or Skeletal Fixation* or Fracture Reduction*).ab,ti                                              | 154     |
| 13 | exp Fracture Healing/                                                                                                | 91      |
| 14 | (fractur* adj3 healing or healing adj3 fractur*).ab,ti                                                               | 210     |
| 15 | (non?union or nonunion or un?united or united or delayed?union or union or malunion).ab,ti                           | 1,023   |
| 16 | Surgical Wound Infection*.ab,ti                                                                                      | 1       |
| 17 | Surgical Site Infection*.ab,ti                                                                                       | 26      |
| 18 | Postoperative Wound Infection*.ab,ti                                                                                 | 10      |
| 19 | (superficial adj2 SSI* or SSI* adj2 superficial).ab,ti                                                               | 1       |
| 20 | (deep adj2 SSI* or SSI* adj2 deep).ab,ti                                                                             | 1       |
| 21 | (Organ adj1 space SSI* or space adj1 Organ SSI*).ab,ti                                                               | 0       |
| 22 | 10 or 11 or 12 or 13 or 14 or 15 or 16 or 17 or 18 or 19 or 20 or 21                                                 | 2,091   |
| 23 | 9 and 22                                                                                                             | 99      |

|    |                               |   |
|----|-------------------------------|---|
| 24 | limit 23 to yr="2020-Current" | 4 |
|----|-------------------------------|---|

1

2 **S2.1.4. The fourth search strategy (the third updated search)**

3 **S2.1.4a. MEDLINE database (year of 2020 to August 7<sup>th</sup>, 2021)**

| #  | Searches                                                                                          | Results |
|----|---------------------------------------------------------------------------------------------------|---------|
| 1  | exp Smoking/                                                                                      | 153,370 |
| 2  | exp "Tobacco Use Disorder"/                                                                       | 11,673  |
| 3  | Nicotine\$.ab,ti.                                                                                 | 42,408  |
| 4  | Cigarette\$.ab,ti.                                                                                | 75,838  |
| 5  | Smok\$.ab,ti.                                                                                     | 298,115 |
| 6  | tobacco\$.ab,ti.                                                                                  | 105,698 |
| 7  | 1 or 2 or 3 or 4 or 5 or 6                                                                        | 408,689 |
| 8  | exp Alcohol Drinking/                                                                             | 72,471  |
| 9  | exp Alcoholism/                                                                                   | 76,808  |
| 10 | exp Drinking Behavior/                                                                            | 79,116  |
| 11 | (Dr?nk\$ adj3 (Behavior\$ or Alcohol\$)).ab,ti.                                                   | 25,315  |
| 12 | Alcoholism\$.ab,ti.                                                                               | 27,309  |
| 13 | alcoholic\$.ab,ti.                                                                                | 68,005  |
| 14 | (alcohol\$ adj3 (dependen\$ or disorder\$ or drink\$ or misuse or abuse\$ or consumption)).ab,ti. | 104,318 |
| 15 | 8 or 9 or 10 or 11 or 12 or 13 or 14                                                              | 239,073 |
| 16 | 7 or 15                                                                                           | 604,414 |
| 17 | exp Fractures, Bone/                                                                              | 192,917 |
| 18 | Broken Bone\$.ab,ti.                                                                              | 312     |
| 19 | Bone Fracture\$.ab,ti.                                                                            | 11,164  |
| 20 | Spiral Fracture\$.ab,ti.                                                                          | 358     |
| 21 | Torsion Fracture\$.ab,ti.                                                                         | 43      |
| 22 | exp Fracture Fixation/                                                                            | 64,931  |
| 23 | Fracture Fixation\$.ab,ti.                                                                        | 3,598   |
| 24 | Skeletal Fixation\$.ab,ti.                                                                        | 553     |
| 25 | Fracture Reduction\$.ab,ti.                                                                       | 2,686   |
| 26 | exp Fracture Healing/                                                                             | 14,083  |
| 27 | (fractur\$ adj3 healing).ab,ti.                                                                   | 10,561  |
| 28 | (non?union or nonunion or un?united or ununited or delayed?union or union or malunion).ab,ti.     | 66,632  |
| 29 | exp Surgical Wound Infection/                                                                     | 37,954  |
| 30 | Surgical Wound Infection\$.ab,ti.                                                                 | 1,345   |
| 31 | Surgical Site Infection\$.ab,ti.                                                                  | 12,338  |

|    |                                                                                                                |         |
|----|----------------------------------------------------------------------------------------------------------------|---------|
| 32 | Postoperative Wound Infection\$.ab,ti.                                                                         | 1,681   |
| 33 | (superficial adj2 SSI\$).ab,ti.                                                                                | 400     |
| 34 | (deep adj2 SSI\$).ab,ti.                                                                                       | 427     |
| 35 | (Organ adj space SSI\$).ab,ti.                                                                                 | 280     |
| 36 | 17 or 18 or 19 or 20 or 21 or 22 or 23 or 24 or 25 or 26 or 27 or 28 or 29 or 30 or 31 or 32 or 33 or 34 or 35 | 303,900 |
| 37 | 16 and 36                                                                                                      | 5,361   |
| 38 | limit 37 to humans                                                                                             | 4,769   |
| 39 | limit 38 to yr="2020 -Current"                                                                                 | 378     |

1

2 **S2.1.4b. EMBASE database (year of 2020 to August 7<sup>th</sup>, 2021)**

| No. | Query                                                                                                                             | Results |
|-----|-----------------------------------------------------------------------------------------------------------------------------------|---------|
| #39 | #37 AND 'human'/de AND [2020-2021]/py                                                                                             | 1,499   |
| #38 | #37 AND 'human'/de                                                                                                                | 12,040  |
| #37 | #16 AND #36                                                                                                                       | 12,948  |
| #36 | #17 OR #18 OR #19 OR #20 OR #21 OR #22 OR #23 OR #24 OR #25 OR #26 OR #27 OR #28 OR #29 OR #30 OR #31 OR #32 OR #33 OR #34 OR #35 | 494,723 |
| #35 | (organ NEAR/1 'space ssi*'):ab,ti                                                                                                 | 566     |
| #34 | (deep NEAR/2 ssi*):ab,ti                                                                                                          | 709     |
| #33 | (superficial NEAR/2 ssi*):ab,ti                                                                                                   | 727     |
| #32 | postoperative wound infection*':ab,ti                                                                                             | 2,167   |
| #31 | surgical site infection*':ab,ti                                                                                                   | 18,307  |
| #30 | surgical wound infection*':ab,ti                                                                                                  | 1,740   |
| #29 | surgical infection'/exp                                                                                                           | 54,736  |
| #28 | non?union:ab,ti OR nonunion:ab,ti OR un?united:ab,ti OR ununited:ab,ti OR delayed?union:ab,ti OR union:ab,ti OR malunion:ab,ti    | 88,415  |
| #27 | (fractur* NEAR/3 healing):ab,ti                                                                                                   | 13,399  |
| #26 | fracture healing'/exp                                                                                                             | 55,249  |
| #25 | fracture reduction*':ab,ti                                                                                                        | 3,209   |
| #24 | skeletal fixation*':ab,ti                                                                                                         | 656     |
| #23 | fracture fixation*':ab,ti                                                                                                         | 4,059   |
| #22 | fracture fixation'/exp                                                                                                            | 97,671  |
| #21 | torsion fracture*':ab,ti                                                                                                          | 49      |
| #20 | spiral fracture*':ab,ti                                                                                                           | 420     |
| #19 | bone fracture*':ab,ti                                                                                                             | 15,462  |
| #18 | broken bone*':ab,ti                                                                                                               | 416     |
| #17 | fracture'/exp                                                                                                                     | 348,494 |
| #16 | #7 OR #15                                                                                                                         | 900,052 |
| #15 | #8 OR #9 OR #10 OR #11 OR #12 OR #13 OR #14                                                                                       | 322,140 |
| #14 | (alcohol* NEAR/3 (dependen* OR disorder* OR drink* OR misuse OR abuse* OR consumption)):ab,ti                                     | 148,372 |

|     |                                               |         |
|-----|-----------------------------------------------|---------|
| #13 | alcoholic*:ab,ti                              | 104,532 |
| #12 | alcoholism*:ab,ti                             | 39,870  |
| #11 | (dr?nk* NEAR/3 (behavior* OR alcohol*)):ab,ti | 35,820  |
| #10 | drinking behavior'/exp                        | 52,818  |
| #9  | alcoholism'/exp                               | 135,601 |
| #8  | drinking behavior'/exp                        | 52,818  |
| #7  | #1 OR #2 OR #3 OR #4 OR #5 OR #6              | 634,513 |
| #6  | tobacco*:ab,ti                                | 129,269 |
| #5  | smok*:ab,ti                                   | 444,665 |
| #4  | cigarette*:ab,ti                              | 97,046  |
| #3  | nicotine*:ab,ti                               | 53,686  |
| #2  | tobacco dependence'/exp                       | 22,544  |
| #1  | smoking'/exp                                  | 418,522 |

1

2 **S2.1.4c. Cochrane library database (year of 2020 to August 7<sup>th</sup>, 2021)**

| ID  | Search                                                                                             | Hits   |
|-----|----------------------------------------------------------------------------------------------------|--------|
| #1  | MeSH descriptor: [Smoke] explode all trees                                                         | 415    |
| #2  | MeSH descriptor: [Tobacco Use Disorder] explode all trees                                          | 1,741  |
| #3  | (Nicotine*):ti,ab,kw                                                                               | 7,381  |
| #4  | (Cigarette*):ti,ab,kw                                                                              | 8,788  |
| #5  | (Smok*):ti,ab,kw                                                                                   | 38,541 |
| #6  | (tobacco*):ti,ab,kw                                                                                | 9,636  |
| #7  | #1 or #2 or #3 or #4 or #5 or #6                                                                   | 41,663 |
| #8  | MeSH descriptor: [Alcohol Drinking] explode all trees                                              | 4,022  |
| #9  | MeSH descriptor: [Alcohols] explode all trees                                                      | 38,243 |
| #10 | MeSH descriptor: [Drinking Behavior] explode all trees                                             | 4,167  |
| #11 | ((Dr?nk* near/3 (Behavior* or Alcohol*)):ti,ab,kw                                                  | 7,066  |
| #12 | (Alcoholism*):ti,ab,kw                                                                             | 6,971  |
| #13 | (alcoholic*):ti,ab,kw                                                                              | 7,633  |
| #14 | ((alcohol* near/3 (dependen* or disorder* or drink* or misuse or abuse* or consumption))):ti,ab,kw | 15,509 |
| #15 | #8 or #9 or #10 or #11 or #12 or #13 or #14                                                        | 58,722 |
| #16 | #7 or #15                                                                                          | 96,041 |
| #17 | MeSH descriptor: [Fractures, Bone] explode all trees                                               | 6,415  |
| #18 | (Broken Bone*):ti,ab,kw                                                                            | 184    |
| #19 | (Bone Fracture*):ti,ab,kw                                                                          | 11,248 |
| #20 | (Spiral Fracture*):ti,ab,kw                                                                        | 59     |
| #21 | (Torsion Fracture*):ti,ab,kw                                                                       | 54     |
| #22 | MeSH descriptor: [Fracture Fixation] explode all trees                                             | 1,829  |

|     |                                                                                                                                   |        |
|-----|-----------------------------------------------------------------------------------------------------------------------------------|--------|
| #23 | (Fracture Fixation*):ti,ab,kw                                                                                                     | 4,126  |
| #24 | (Skeletal Fixation*):ti,ab,kw                                                                                                     | 179    |
| #25 | (Fracture Reduction*):ti,ab,kw                                                                                                    | 4,176  |
| #26 | MeSH descriptor: [Fracture Healing] explode all trees                                                                             | 545    |
| #27 | ((fractur* near/3 healing)):ti,ab,kw                                                                                              | 1,594  |
| #28 | ((non?union or nonunion or un?united or ununited or delayed?union or union or malunion)):ti,ab,kw                                 | 3,605  |
| #29 | MeSH descriptor: [Surgical Wound Infection] explode all trees                                                                     | 3,505  |
| #30 | (Surgical Wound Infection*):ti,ab,kw                                                                                              | 7,420  |
| #31 | (Surgical Site Infection*):ti,ab,kw                                                                                               | 3,903  |
| #32 | (Postoperative Wound Infection*):ti,ab,kw                                                                                         | 5,826  |
| #33 | ((superficial near/2 SSI*)):ti,ab,kw                                                                                              | 122    |
| #34 | ((deep near/2 SSI*)):ti,ab,kw                                                                                                     | 95     |
| #35 | ((Organ near/1 space SSI*)):ti,ab,kw                                                                                              | 91     |
| #36 | #17 or #18 or #19 or #20 or #21 or #22 or #23 or #24 or #25 or #26 or #27 or #28 or #29 or #30 or #31 or #32 or #33 or #34 or #35 | 28,087 |
| #37 | #16 and #36 with Publication Year from 2020 to 2021, in Trials                                                                    | 113    |

1

2 **S2.1.4d. CINAHL database (year of 2020 to August 7<sup>th</sup>, 2021)**

| #   | Query                                                                                                                                                                                       | Results |
|-----|---------------------------------------------------------------------------------------------------------------------------------------------------------------------------------------------|---------|
| S28 | S12 AND S27 (Limiters - Published Date: 20201001-20210831)                                                                                                                                  | 95      |
| S27 | S13 or S14 or S15 or S16 or S17 or S18 or S19 or S20 or S21 or S22 or S23 or S24 or S25 or S26                                                                                              | 51,051  |
| S26 | TI Organ w1 space SSI* or AB Organ w1 space SSI*                                                                                                                                            | 111     |
| S25 | TI deep w2 SSI* or AB deep w2 SSI*                                                                                                                                                          | 168     |
| S24 | TI superficial w2 SSI* or AB superficial w2 SSI*                                                                                                                                            | 160     |
| S23 | TI Postoperative Wound Infection* or AB Postoperative Wound Infection*                                                                                                                      | 319     |
| S22 | TI Surgical Site Infection* or AB Surgical Site Infection*                                                                                                                                  | 5,924   |
| S21 | TI Surgical Wound Infection* or AB Surgical Wound Infection*                                                                                                                                | 352     |
| S20 | (MM "Surgical Wound Infection")                                                                                                                                                             | 7,563   |
| S19 | TI ( non?union or nonunion or un?united or ununited or delayed?union or union or malunion ) OR AB ( non? union or nonunion or un?united or ununited or delayed?union or union or malunion ) | 23,750  |
| S18 | TI fractur* w3 healing OR AB fractur* w3 healing                                                                                                                                            | 2,082   |
| S17 | (MM "Fracture Healing")                                                                                                                                                                     | 1,801   |
| S16 | TI Fracture Fixation* or AB Fracture Fixation* or TI Skeletal Fixation* or AB Skeletal Fixation* or TI Fracture Reduction* or AB Fracture Reduction*                                        | 2,369   |
| S15 | (MH "Fracture Fixation+")                                                                                                                                                                   | 16,320  |
| S14 | TI Broken Bone* or AB Broken Bone* or TI Bone Fracture* or AB Bone Fracture* or TI Spiral Fracture* or AB Spiral Fracture* or TI Torsion Fracture* or AB Torsion Fracture*                  | 2,810   |
| S13 | (MM "Carpal Fractures")                                                                                                                                                                     | 119     |
| S12 | S4 or S11                                                                                                                                                                                   | 267,092 |
| S11 | S5 or S6 or S7 or S8 or S9 or S10                                                                                                                                                           | 66,286  |

|     |                                                                                                                                                                                          |         |
|-----|------------------------------------------------------------------------------------------------------------------------------------------------------------------------------------------|---------|
| S10 | TI ( (alcohol* w3 (dependen* or disorder* or drink* or misuse or abuse* or consumption)) ) OR AB ( (alcohol* w3 (dependen* or disorder* or drink* or misuse or abuse* or consumption)) ) | 36,726  |
| S9  | TI ( Dr?nk* w3 (Behavior* or Alcohol*) ) OR AB ( Dr?nk* w3 (Behavior* or Alcohol*) )                                                                                                     | 7,588   |
| S8  | TI Alcoholism* or AB Alcoholism*                                                                                                                                                         | 5,329   |
| S7  | (MH "Drinking Behavior+")                                                                                                                                                                | 34,487  |
| S6  | (MM "Alcoholism")                                                                                                                                                                        | 12,499  |
| S5  | (MH "Alcohol Drinking+")                                                                                                                                                                 | 32,975  |
| S4  | S1 or S2 or S3                                                                                                                                                                           | 242,228 |
| S3  | TI Nicotine* OR AB Nicotine* OR TI Cigarette* OR AB Cigarette* OR TI Smok* OR AB Smok* OR TI tobacco* OR AB tobacco*                                                                     | 119,612 |
| S2  | (MH "Substance Use Disorders+")                                                                                                                                                          | 173,171 |
| S1  | (MH "Smoking+")                                                                                                                                                                          | 74,980  |

1

2 **S2.1.4e. AMED database (year of 2020 to August 9<sup>th</sup>, 2021 via Ovid)**

| #  | Searches                                                                                                             | Results |
|----|----------------------------------------------------------------------------------------------------------------------|---------|
| 1  | exp smoking/                                                                                                         | 646     |
| 2  | (Nicotine* OR Cigarette* OR Smok* OR tobacco*).ab,ti                                                                 | 1,683   |
| 3  | exp Alcohol Drinking/                                                                                                | 255     |
| 4  | exp Alcoholism/                                                                                                      | 393     |
| 5  | exp Drinking Behavior/                                                                                               | 309     |
| 6  | Alcoholism*.ab,ti                                                                                                    | 139     |
| 7  | (Dr?nk* adj3 Behavior* or Behavior* adj3 Dr?nk* or Alcohol*).ab,ti                                                   | 2,000   |
| 8  | (alcohol* adj3 dependen* or dependen* adj3 alcohol* or disorder* or drink* or misuse or abuse* or consumption).ab,ti | 19,793  |
| 9  | 1 or 2 or 3 or 4 or 5 or 6 or 7 or 8                                                                                 | 22,464  |
| 10 | exp Fracture Fixation/                                                                                               | 843     |
| 11 | (Broken Bone* or Bone Fracture* or Spiral Fracture* or Torsion Fracture*).ab,ti                                      | 147     |
| 12 | (Fracture Fixation* or Skeletal Fixation* or Fracture Reduction*).ab,ti                                              | 158     |
| 13 | exp Fracture Healing/                                                                                                | 92      |
| 14 | (fractur* adj3 healing or healing adj3 fractur*).ab,ti                                                               | 214     |
| 15 | (non?union or nonunion or un?united or ununited or delayed?union or union or malunion).ab,ti                         | 1,075   |
| 16 | Surgical Wound Infection*.ab,ti                                                                                      | 1       |
| 17 | Surgical Site Infection*.ab,ti                                                                                       | 30      |
| 18 | Postoperative Wound Infection*.ab,ti                                                                                 | 10      |
| 19 | (superficial adj2 SSI* or SSI* adj2 superficial).ab,ti                                                               | 1       |
| 20 | (deep adj2 SSI* or SSI* adj2 deep).ab,ti                                                                             | 1       |
| 21 | (Organ adj1 space SSI* or space adj1 Organ SSI*).ab,ti                                                               | 0       |
| 22 | 10 or 11 or 12 or 13 or 14 or 15 or 16 or 17 or 18 or 19 or 20 or 21                                                 | 2,167   |
| 23 | 9 and 22                                                                                                             | 103     |

|    |                               |   |
|----|-------------------------------|---|
| 24 | limit 23 to yr="2020-Current" | 7 |
|----|-------------------------------|---|

1

2 **S2.2. Search strategies for the impacts of preoperative smoking cessation time, NRT, and vaping o**  
3 **n fracture healing, postoperative surgical site infection, and malunion**

4 **S2.2.1. The first search strategy**

5 **S2.2.1a. MEDLINE database via Ovid (inception of database to April 20<sup>th</sup>, 2021)**

| #  | Searches                                                                                                                   | Results |
|----|----------------------------------------------------------------------------------------------------------------------------|---------|
| 1  | exp Fractures, Bone/                                                                                                       | 189,044 |
| 2  | Broken Bone\$.ab,ti.                                                                                                       | 302     |
| 3  | Bone Fracture\$.ab,ti.                                                                                                     | 10,913  |
| 4  | Spiral Fracture\$.ab,ti.                                                                                                   | 352     |
| 5  | Torsion Fracture\$.ab,ti.                                                                                                  | 43      |
| 6  | exp Fracture Fixation/                                                                                                     | 63,381  |
| 7  | Fracture Fixation\$.ab,ti.                                                                                                 | 3,486   |
| 8  | Skeletal Fixation\$.ab,ti.                                                                                                 | 548     |
| 9  | Fracture Reduction\$.ab,ti.                                                                                                | 2,603   |
| 10 | exp Fracture Healing/                                                                                                      | 13,783  |
| 11 | (fractur\$ adj3 healing).ab,ti.                                                                                            | 10,343  |
| 12 | (non?union or nonunion or un?united or ununited or delayed?union or union or malunion).ab,ti.                              | 65,111  |
| 13 | exp Surgical Wound Infection/                                                                                              | 37,337  |
| 14 | Surgical Wound Infection\$.ab,ti.                                                                                          | 1,327   |
| 15 | Surgical Site Infection\$.ab,ti.                                                                                           | 11,920  |
| 16 | Postoperative Wound Infection\$.ab,ti.                                                                                     | 1,666   |
| 17 | (superficial adj2 SSI\$).ab,ti.                                                                                            | 387     |
| 18 | (deep adj2 SSI\$).ab,ti.                                                                                                   | 407     |
| 19 | (Organ adj space SSI\$).ab,ti.                                                                                             | 276     |
| 20 | 1 or 2 or 3 or 4 or 5 or 6 or 7 or 8 or 9 or 10 or 11 or 12 or 13 or 14 or 15 or 16 or 17 or 18 or 19                      | 298,187 |
| 21 | exp Smoking Cessation/                                                                                                     | 29,675  |
| 22 | exp Smoking Reduction/                                                                                                     | 82      |
| 23 | ((quit\$ or stop\$ or ceas\$ or giv\$ or abstain\$ or abstinen\$ or Cessat\$ or reduc\$) adj3 (smok\$ or toba cco)).ti,ab. | 47,526  |
| 24 | "Tobacco Use Cessation"/                                                                                                   | 1,238   |
| 25 | "Tobacco Use Cessation Products"/                                                                                          | 1,967   |
| 26 | Nicotinic Agonists/                                                                                                        | 7,438   |
| 27 | Smoking Cessation Agents/                                                                                                  | 211     |
| 28 | Nicotine Chewing Gum/                                                                                                      | 26      |
| 29 | NRT.ti,ab.                                                                                                                 | 2,180   |
| 30 | nicotine replacement.tw,kf.                                                                                                | 3,605   |
| 31 | ((nicotine or tobacco) adj2 (gum* or lozenge* or patch* or spray*)).tw,kf.                                                 | 2,481   |
| 32 | (pharmaco* adj2 (nicotine or tobacco or smoking)).tw,kf.                                                                   | 1,138   |
| 33 | exp Vaping/                                                                                                                | 1,666   |
| 34 | exp Electronic Nicotine Delivery Systems/                                                                                  | 4,359   |
| 35 | (Ecigarette\$ or e-cigarette\$).ab,ti.                                                                                     | 5,132   |



|    |                                                                                                                |        |
|----|----------------------------------------------------------------------------------------------------------------|--------|
| 36 | Electronic-Cigarette\$.ab,ti.                                                                                  | 3,314  |
| 37 | (electron* adj3 (cig\$ or nicotine\$)).ab,ti.                                                                  | 3,927  |
| 38 | (e-cig\$ or ecig\$).ti,ab.                                                                                     | 5,396  |
| 39 | (vape\$ or vaporizer\$ or vaporiser\$ or vapourizer\$ or vapouriser\$ or vaping\$).ti,ab.                      | 3,368  |
| 40 | 21 or 22 or 23 or 24 or 25 or 26 or 27 or 28 or 29 or 30 or 31 or 32 or 33 or 34 or 35 or 36 or 37 or 38 or 39 | 70,169 |
| 41 | 20 and 40                                                                                                      | 518    |
| 42 | limit 41 to humans                                                                                             | 429    |

1

2

## S2.2.1b. EMBASE database (inception of database to April 21<sup>st</sup>, 2021)

| No. | Query                                                                                                                             | Results |
|-----|-----------------------------------------------------------------------------------------------------------------------------------|---------|
| #42 | #41 AND 'human'/de                                                                                                                | 1,241   |
| #41 | #20 AND #40                                                                                                                       | 1,386   |
| #40 | #21 OR #22 OR #23 OR #24 OR #25 OR #26 OR #27 OR #28 OR #29 OR #30 OR #31 OR #32 OR #33 OR #34 OR #35 OR #36 OR #37 OR #38 OR #39 | 116,498 |
| #39 | vape*:ab,ti OR vaporizer*:ab,ti OR vaporiser*:ab,ti OR vapourizer*:ab,ti OR vapouriser*:ab,ti OR vaping*:ab,ti                    | 4,216   |
| #38 | 'e cig*:ab,ti OR ecig*:ab,ti                                                                                                      | 6,587   |
| #37 | (electron* NEAR/3 (cig* OR nicotine*)):ab,ti                                                                                      | 4,715   |
| #36 | 'electronic cigarette*':ab,ti                                                                                                     | 4,019   |
| #35 | ecigarette*:ab,ti OR 'e cigarette*':ab,ti                                                                                         | 6,225   |
| #34 | 'electronic cigarette'/exp                                                                                                        | 7,725   |
| #33 | 'vaping'/exp                                                                                                                      | 2,978   |
| #32 | (pharmaco* NEAR/2 (nicotine OR tobacco OR smoking)):ab,ti                                                                         | 1,379   |
| #31 | ((nicotine OR tobacco) NEAR/2 (gum* OR lozenge* OR patch* OR spray*)):ab,ti                                                       | 2,996   |
| #30 | 'nicotine replacement':ab,ti                                                                                                      | 4,560   |
| #29 | nrt:ab,ti                                                                                                                         | 2,883   |
| #28 | nicotine chewing gum'/exp                                                                                                         | 2,958   |
| #27 | smoking cessation agents'/exp                                                                                                     | 37      |
| #26 | nicotinic agonists'/exp                                                                                                           | 25,388  |
| #25 | tobacco use cessation products'/exp                                                                                               | 2,958   |
| #24 | 'tobacco use cessation'/exp                                                                                                       | 61,570  |
| #23 | ((quit* OR stop* OR ceas* OR giv* OR abstain* OR abstin* OR cessat* OR reduc*) NEAR/3 (smok* OR tobacco)):ab,ti                   | 62,145  |
| #22 | 'smoking reduction'/exp                                                                                                           | 275     |
| #21 | 'smoking cessation'/exp                                                                                                           | 61,570  |
| #20 | #1 OR #2 OR #3 OR #4 OR #5 OR #6 OR #7 OR #8 OR #9 OR #10 OR #11 OR #12 OR #13 OR #14 OR #15 OR #16 OR #17 OR #18 OR #19          | 486,284 |
| #19 | (organ NEAR/1 'space ssi*'):ab,ti                                                                                                 | 550     |
| #18 | (deep NEAR/2 ssi*):ab,ti                                                                                                          | 690     |
| #17 | (superficial NEAR/2 ssi*):ab,ti                                                                                                   | 705     |
| #16 | 'postoperative wound infection*':ab,ti                                                                                            | 2,144   |
| #15 | 'surgical site infection*':ab,ti                                                                                                  | 17,707  |
| #14 | 'surgical wound infection*':ab,ti                                                                                                 | 1,715   |
| #13 | 'surgical infection'/exp                                                                                                          | 53,306  |
| #12 | non?union:ab,ti OR nonunion:ab,ti OR un?united:ab,ti OR ununited:ab,ti OR delayed?union:ab,ti OR union:ab,ti OR malunion:ab,ti    | 86,831  |
| #11 | (fractur* NEAR/3 healing):ab,ti                                                                                                   | 13,154  |

|     |                             |         |
|-----|-----------------------------|---------|
| #10 | 'fracture healing'/exp      | 54,261  |
| #9  | 'fracture reduction*':ab,ti | 3,138   |
| #8  | 'skeletal fixation*':ab,ti  | 653     |
| #7  | 'fracture fixation*':ab,ti  | 3,952   |
| #6  | 'fracture fixation'/exp     | 96,045  |
| #5  | 'torsion fracture*':ab,ti   | 48      |
| #4  | 'spiral fracture*':ab,ti    | 415     |
| #3  | 'bone fracture*':ab,ti      | 15,151  |
| #2  | 'broken bone*':ab,ti        | 407     |
| #1  | 'fracture'/exp              | 342,927 |

1

## 2 S2.2.1c. Cochrane library database (inception of database to April 21<sup>st</sup>, 2021)

| ID  | Search                                                                                                                   | Hits   |
|-----|--------------------------------------------------------------------------------------------------------------------------|--------|
| #1  | MeSH descriptor: [Fractures, Bone] explode all trees                                                                     | 6,224  |
| #2  | (Broken Bone*):ti,ab,kw                                                                                                  | 177    |
| #3  | (Bone Fracture*):ti,ab,kw                                                                                                | 10,926 |
| #4  | (Spiral Fracture*):ti,ab,kw                                                                                              | 52     |
| #5  | (Torsion Fracture*):ti,ab,kw                                                                                             | 49     |
| #6  | MeSH descriptor: [Fracture Fixation] explode all trees                                                                   | 1,770  |
| #7  | (Fracture Fixation*):ti,ab,kw                                                                                            | 3,988  |
| #8  | (Skeletal Fixation*):ti,ab,kw                                                                                            | 176    |
| #9  | (Fracture Reduction*):ti,ab,kw                                                                                           | 4,052  |
| #10 | MeSH descriptor: [Fracture Healing] explode all trees                                                                    | 538    |
| #11 | ((fractur* near/3 healing)):ti,ab,kw                                                                                     | 1,531  |
| #12 | ((non?union or nonunion or un?united or ununited or delayed?union or union or malunion)):ti,ab,kw                        | 3,486  |
| #13 | MeSH descriptor: [Surgical Wound Infection] explode all trees                                                            | 3,454  |
| #14 | (Surgical Wound Infection*):ti,ab,kw                                                                                     | 7,242  |
| #15 | (Surgical Site Infection*):ti,ab,kw                                                                                      | 3,744  |
| #16 | (Postoperative Wound Infection*):ti,ab,kw                                                                                | 5,707  |
| #17 | ((superficial near/2 SSI*)):ti,ab,kw                                                                                     | 118    |
| #18 | ((deep near/2 SSI*)):ti,ab,kw                                                                                            | 91     |
| #19 | ((Organ near/1 space SSI*)):ti,ab,kw                                                                                     | 91     |
| #20 | #1 or #2 or #3 or #4 or #5 or #6 or #7 or #8 or #9 or #10 or #11 or #12 or #13 or #14 or #15 or #16 or #17 or #18 or #19 | 27,277 |
| #21 | MeSH descriptor: [Smoking Cessation] explode all trees                                                                   | 4,145  |
| #22 | MeSH descriptor: [Smoking Reduction] explode all trees                                                                   | 25     |
| #23 | ((quit* or stop* or ceas* or giv* or abstain* or abstinen* or Cessat* or reduc*) NEAR/3 (smoke* or tobacco)):ti,ab,kw    | 5,174  |
| #24 | MeSH descriptor: [Tobacco Use Cessation Devices] explode all trees                                                       | 550    |
| #25 | MeSH descriptor: [Nicotine Chewing Gum] explode all trees                                                                | 14     |
| #26 | MeSH descriptor: [Nicotinic Agonists] explode all trees                                                                  | 741    |
| #27 | (Tobacco Use Cessation Products):ti,ab,kw                                                                                | 287    |
| #28 | (Nicotine near/2 patch*):ti,ab,kw                                                                                        | 1,299  |
| #29 | (Nicotine near/2 delivery device*):ti,ab,kw                                                                              | 103    |
| #30 | (nicotine near/2 nasal spray*):ti,ab,kw                                                                                  | 97     |
| #31 | (smoking near/2 cessation product*):ti,ab,kw                                                                             | 639    |

|     |                                                                                                                                                                                                         |        |
|-----|---------------------------------------------------------------------------------------------------------------------------------------------------------------------------------------------------------|--------|
| #32 | (nicotine near/2 replacement):ti,ab,kw                                                                                                                                                                  | 1,837  |
| #33 | (nicotine near/2 lozenge*):ti,ab,kw                                                                                                                                                                     | 177    |
| #34 | (nicotine polacrilex):ti,ab,kw                                                                                                                                                                          | 50     |
| #35 | (nicotine near/2 inhal*):ti,ab,kw                                                                                                                                                                       | 150    |
| #36 | (nicotine near/2 chewing gum*):ti,ab,kw                                                                                                                                                                 | 140    |
| #37 | nicorette:ti,ab,kw                                                                                                                                                                                      | 97     |
| #38 | (nicotinic near/2 agonist*):ti,ab,kw                                                                                                                                                                    | 831    |
| #39 | (nicotine near/2 tablet*):ti,ab,kw                                                                                                                                                                      | 41     |
| #40 | (nicotine near/2 sublingual):ti,ab,kw                                                                                                                                                                   | 25     |
| #41 | NRT:ti,ab,kw                                                                                                                                                                                            | 926    |
| #42 | (nicotine near/3 therap*):ti,ab,kw                                                                                                                                                                      | 2,045  |
| #43 | MeSH descriptor: [Vaping] explode all trees                                                                                                                                                             | 52     |
| #44 | MeSH descriptor: [Electronic Nicotine Delivery Systems] explode all trees                                                                                                                               | 148    |
| #45 | (Ecigarette* or e-cigarette*):ti,ab,kw                                                                                                                                                                  | 542    |
| #46 | (Electronic-Cigarette*):ti,ab,kw                                                                                                                                                                        | 441    |
| #47 | ((electron* NEAR/3 (cig* OR nicotine*)))ti,ab,kw                                                                                                                                                        | 543    |
| #48 | (e-cig* or ecig*):ti,ab,kw                                                                                                                                                                              | 587    |
| #49 | (vape* or vaporizer* or vaporiser* or vapourizer* or vapouriser* or vaping*):ti,ab,kw                                                                                                                   | 2,341  |
| #50 | #21 or #22 or #23 or #24 or #25 or #26 or #27 or #28 or #29 or #30 or #31 or #32 or #33 or #34 or #35 or #36 or #37 or #38 or #39 or #40 or #41 or #42 or #43 or #44 or #45 or #46 or #47 or #48 or #49 | 11,862 |
| #51 | #20 and #50 in Trials                                                                                                                                                                                   | 38     |

1

2

## S2.2.1d. CINAHL database (inception of database to April 21<sup>st</sup>, 2021)

| #   | Query                                                                                                                                                                                                                    | Results |
|-----|--------------------------------------------------------------------------------------------------------------------------------------------------------------------------------------------------------------------------|---------|
| S31 | S15 and S30                                                                                                                                                                                                              | 171     |
| S30 | S16 or S17 or S18 or S19 or S20 or S21 or S22 or S23 or S24 or S25 or S26 or S27 or S28 or S29                                                                                                                           | 31,634  |
| S29 | TI (vape\$ or vaporizer* or vaporiser* or vapourizer* or vapouriser* or vaping*) OR AB (vape\$ or vaporizer* or vaporiser* or vapourizer* or vapouriser* or vaping*)                                                     | 1,624   |
| S28 | TI (e-cig* or ecig* ) OR AB ( e-cig* or ecig* )                                                                                                                                                                          | 3,756   |
| S27 | TI (electron* W3 (cig* or nicotine*)) OR AB (electron* W3 (cig* or nicotine*))                                                                                                                                           | 2,536   |
| S26 | TI Electronic-Cigarette* OR AB Electronic-Cigarette*                                                                                                                                                                     | 2,177   |
| S25 | TI (Ecigarette* OR e-cigarette* ) OR AB ( Ecigarette* OR e-cigarette*)                                                                                                                                                   | 3,614   |
| S24 | (MM "Electronic Cigarettes")                                                                                                                                                                                             | 1,919   |
| S23 | (MM "Vaping")                                                                                                                                                                                                            | 197     |
| S22 | TI (nicotine and (gum* or lozenge* or spray* or patch*)) OR AB (nicotine and (gum* or lozenge* or spray* or patch*))                                                                                                     | 1,150   |
| S21 | TI nicotine replacement OR AB nicotine replacement                                                                                                                                                                       | 1,836   |
| S20 | TI NRT OR AB NRT                                                                                                                                                                                                         | 947     |
| S19 | (MH "Nicotine Chewing Gum" OR (MH "Nicotine Patch"))                                                                                                                                                                     | 454     |
| S18 | (MH ("Nicotine Replacement Therapy") OR (MH "Tobacco Use Cessation Products+") OR (MH "Nicotinic Agonists+"))                                                                                                            | 10,955  |
| S17 | TI ((quit* or stop* or ceas* or giv* or abstain* or abstinen* or Cessat* or reduc*) W3 (smok* or tobacco)) OR AB ((quit* or stop* or ceas* or giv* or abstain* or abstinen* or Cessat* or reduc*) W3 (smok* or tobacco)) | 13,454  |
| S16 | (MM "Smoking Cessation")                                                                                                                                                                                                 | 14,099  |
| S15 | S1 or S2 or S3 or S4 or S5 or S6 or S7 or S8 or S9 or S10 or S11 or S12 or S13 or S14                                                                                                                                    | 48,618  |

|     |                                                                                                                                                                                             |        |
|-----|---------------------------------------------------------------------------------------------------------------------------------------------------------------------------------------------|--------|
| S14 | TI Organ w1 space SSI* or AB Organ w1 space SSI*                                                                                                                                            | 106    |
| S13 | TI deep w2 SSI* or AB deep w2 SSI*                                                                                                                                                          | 160    |
| S12 | TI superficial w2 SSI* or AB superficial w2 SSI*                                                                                                                                            | 156    |
| S11 | TI Postoperative Wound Infection* or AB Postoperative Wound Infection*                                                                                                                      | 311    |
| S10 | TI Surgical Site Infection* or AB Surgical Site Infection*                                                                                                                                  | 5,719  |
| S9  | TI Surgical Wound Infection* or AB Surgical Wound Infection*                                                                                                                                | 348    |
| S8  | (MM "Surgical Wound Infection")                                                                                                                                                             | 7,394  |
| S7  | TI ( non?union or nonunion or un?united or ununited or delayed?union or union or malunion ) OR A B ( non?union or nonunion or un?united or ununited or delayed?union or union or malunion ) | 22,127 |
| S6  | TI fractur* w3 healing OR AB fractur* w3 healing                                                                                                                                            | 2,015  |
| S5  | (MM "Fracture Healing")                                                                                                                                                                     | 1,766  |
| S4  | TI Fracture Fixation* or AB Fracture Fixation* or TI Skeletal Fixation* or AB Skeletal Fixation* or TI Fracture Reduction* or AB Fracture Reduction*                                        | 2,276  |
| S3  | (MH "Fracture Fixation+")                                                                                                                                                                   | 15,526 |
| S2  | TI Broken Bone* or AB Broken Bone* or TI Bone Fracture* or AB Bone Fracture* or TI Spiral Fracture* or AB Spiral Fracture* or TI Torsion Fracture* or AB Torsion Fracture*                  | 2,740  |
| S1  | (MM "Carpal Fractures")                                                                                                                                                                     | 115    |

1

2

### S2.2.1e. AMED database (inception of database to April 22<sup>nd</sup>, 2021)

| #  | Searches                                                                                                                                       | Results |
|----|------------------------------------------------------------------------------------------------------------------------------------------------|---------|
| 1  | exp Fracture Fixation/                                                                                                                         | 828     |
| 2  | (Broken Bone* or Bone Fracture* or Spiral Fracture* or Torsion Fracture*).ab,ti.                                                               | 144     |
| 3  | (Fracture Fixation* or Skeletal Fixation* or Fracture Reduction*).ab,ti                                                                        | 154     |
| 4  | exp Fracture Healing/                                                                                                                          | 91      |
| 5  | ((fractur* adj3 healing) or healing) adj3 fractur*).ab,ti.                                                                                     | 213     |
| 6  | (non?union or nonunion or un?united or ununited or delayed?union or union or malunion).ab,ti.                                                  | 1,041   |
| 7  | Surgical Wound Infection*.ab,ti.                                                                                                               | 1       |
| 8  | Surgical Surgical Site Infection*.ab,ti.Site Infection*.ab,ti                                                                                  | 27      |
| 9  | Postoperative Wound Infection*.ab,ti.                                                                                                          | 10      |
| 10 | ((superficial adj2 SSI*) or SSI*) adj2 superficial).ab,ti.                                                                                     | 1       |
| 11 | ((deep adj2 SSI*) or SSI*) adj2 deep).ab,ti.                                                                                                   | 1       |
| 12 | ((Organ adj1 space SSI*) or space) adj1 Organ SSI*).ab,ti.                                                                                     | 0       |
| 13 | 1 or 2 or 3 or 4 or 5 or 6 or 7 or 8 or 9 or 10 or 11 or 12                                                                                    | 2,116   |
| 14 | Smoking Cessation.mp. [mp=abstract, heading words, title]                                                                                      | 343     |
| 15 | Smoking Reduction.mp. [mp=abstract, heading words, title]                                                                                      | 3       |
| 16 | ((quit* or stop* or ceas* or giv* or abstain* or abstin* or Cessat* or reduc*) and (smok* or tobacco)).mp. [mp=abstract, heading words, title] | 650     |
| 17 | "Tobacco Use Cessation"/                                                                                                                       | 0       |
| 18 | "Tobacco Use Cessation Products"/                                                                                                              | 0       |
| 19 | Nicotinic Agonists/                                                                                                                            | 0       |
| 20 | Smoking Cessation Agents/                                                                                                                      | 0       |
| 21 | Nicotine Chewing Gum/                                                                                                                          | 0       |
| 22 | NRT.ti,ab.                                                                                                                                     | 8       |
| 23 | nicotine replacement.tw.                                                                                                                       | 18      |
| 24 | ((nicotine or tobacco) adj2 (gum* or lozenge* or patch* or spray*).tw.                                                                         | 11      |
| 25 | (pharmaco* adj2 (nicotine or tobacco or smoking)).tw.                                                                                          | 10      |

|    |                                                                                                    |     |
|----|----------------------------------------------------------------------------------------------------|-----|
| 26 | (ecigarette* or e cigarette*).ab,ti.                                                               | 7   |
| 27 | electronic cigarette*.ab,ti.                                                                       | 2   |
| 28 | (electron* adj3 (cig* or nicotine*)).ab,ti.                                                        | 5   |
| 29 | (e cig* or ecig*).ab,ti.                                                                           | 7   |
| 30 | (vape* or vaporizer* or vaporiser* or vapourizer* or vapouriser* or vaping*).ab,ti.                | 6   |
| 31 | 14 or 15 or 16 or 17 or 18 or 19 or 20 or 21 or 22 or 23 or 24 or 25 or 26 or 27 or 28 or 29 or 30 | 665 |
| 32 | 13 and 31                                                                                          | 21  |

1

2 **S2.2.2. The second search strategy (the first updated search)**

3 **S2.2.2a. MEDLINE database via Ovid (year of 2021 to August 6<sup>th</sup>, 2021)**

| #  | Searches                                                                                                                  | Results |
|----|---------------------------------------------------------------------------------------------------------------------------|---------|
| 1  | exp Fractures, Bone/                                                                                                      | 192,917 |
| 2  | Broken Bone\$.ab,ti.                                                                                                      | 312     |
| 3  | Bone Fracture\$.ab,ti.                                                                                                    | 11,164  |
| 4  | Spiral Fracture\$.ab,ti.                                                                                                  | 358     |
| 5  | Torsion Fracture\$.ab,ti.                                                                                                 | 43      |
| 6  | exp Fracture Fixation/                                                                                                    | 64,931  |
| 7  | Fracture Fixation\$.ab,ti.                                                                                                | 3,598   |
| 8  | Skeletal Fixation\$.ab,ti.                                                                                                | 553     |
| 9  | Fracture Reduction\$.ab,ti.                                                                                               | 2,686   |
| 10 | exp Fracture Healing/                                                                                                     | 14,083  |
| 11 | (fractur\$ adj3 healing).ab,ti.                                                                                           | 10,561  |
| 12 | (non?union or nonunion or un?united or ununited or delayed?union or union or malunion).ab,ti.                             | 66,632  |
| 13 | exp Surgical Wound Infection/                                                                                             | 37,954  |
| 14 | Surgical Wound Infection\$.ab,ti.                                                                                         | 1,345   |
| 15 | Surgical Site Infection\$.ab,ti.                                                                                          | 12,338  |
| 16 | Postoperative Wound Infection\$.ab,ti.                                                                                    | 1,681   |
| 17 | (superficial adj2 SSI\$).ab,ti.                                                                                           | 400     |
| 18 | (deep adj2 SSI\$).ab,ti.                                                                                                  | 427     |
| 19 | (Organ adj space SSI\$).ab,ti.                                                                                            | 280     |
| 20 | 1 or 2 or 3 or 4 or 5 or 6 or 7 or 8 or 9 or 10 or 11 or 12 or 13 or 14 or 15 or 16 or 17 or 18 or 19                     | 303,900 |
| 21 | exp Smoking Cessation/                                                                                                    | 30,268  |
| 22 | exp Smoking Reduction/                                                                                                    | 90      |
| 23 | ((quit\$ or stop\$ or ceas\$ or giv\$ or abstain\$ or abstinen\$ or Cessat\$ or reduc\$) adj3 (smok\$ or tobacco)).ti,ab. | 48,336  |
| 24 | "Tobacco Use Cessation"/                                                                                                  | 1,285   |
| 25 | "Tobacco Use Cessation Products"/                                                                                         | 2,065   |
| 26 | Nicotinic Agonists/                                                                                                       | 7,515   |
| 27 | Smoking Cessation Agents/                                                                                                 | 227     |
| 28 | Nicotine Chewing Gum/                                                                                                     | 27      |
| 29 | NRT.ti,ab.                                                                                                                | 2,237   |
| 30 | nicotine replacement.tw,kf.                                                                                               | 3,688   |
| 31 | ((nicotine or tobacco) adj2 (gum* or lozenge* or patch* or spray*)).tw,kf.                                                | 2,503   |

|    |                                                                                                                |        |
|----|----------------------------------------------------------------------------------------------------------------|--------|
| 32 | (pharmaco* adj2 (nicotine or tobacco or smoking)).tw,kf.                                                       | 1,154  |
| 33 | exp Vaping/                                                                                                    | 2,109  |
| 34 | exp Electronic Nicotine Delivery Systems/                                                                      | 5,020  |
| 35 | (Ecigarette\$ or e-cigarette\$).ab,ti.                                                                         | 5,442  |
| 36 | Electronic-Cigarette\$.ab,ti.                                                                                  | 3,476  |
| 37 | (electron* adj3 (cig\$ or nicotine\$)).ab,ti.                                                                  | 4,139  |
| 38 | (e-cig\$ or ecig\$).ti,ab.                                                                                     | 5,722  |
| 39 | (vape\$ or vaporizer\$ or vaporiser\$ or vapourizer\$ or vapouriser\$ or vaping\$).ti,ab.                      | 3,598  |
| 40 | 21 or 22 or 23 or 24 or 25 or 26 or 27 or 28 or 29 or 30 or 31 or 32 or 33 or 34 or 35 or 36 or 37 or 38 or 39 | 71,553 |
| 41 | 20 and 40                                                                                                      | 529    |
| 42 | limit 41 to humans                                                                                             | 453    |
| 43 | limit 42 to yr="2021 -Current"                                                                                 | 16     |

1

## 2 S2.2.2b. EMBASE database (year of 2021 to August 7<sup>th</sup>, 2021)

| No. | Query                                                                                                                             | Results |
|-----|-----------------------------------------------------------------------------------------------------------------------------------|---------|
| #43 | #41 AND 'human'/de AND [2021-2021]/py                                                                                             | 55      |
| #42 | #41 AND 'human'/de                                                                                                                | 1,263   |
| #41 | #20 AND #40                                                                                                                       | 1,408   |
| #40 | #21 OR #22 OR #23 OR #24 OR #25 OR #26 OR #27 OR #28 OR #29 OR #30 OR #31 OR #32 OR #33 OR #34 OR #35 OR #36 OR #37 OR #38 OR #39 | 118,655 |
| #39 | vape*:ab,ti OR vaporizer*:ab,ti OR vaporiser*:ab,ti OR vapourizer*:ab,ti OR vapouriser*:ab,ti OR vaping*:ab,ti                    | 4,525   |
| #38 | e cig*:ab,ti OR ecig*:ab,ti                                                                                                       | 6,969   |
| #37 | (electron* NEAR/3 (cig* OR nicotine*)):ab,ti                                                                                      | 4,943   |
| #36 | electronic cigarette*:ab,ti                                                                                                       | 4,199   |
| #35 | ecigarette*:ab,ti OR 'e cigarette*':ab,ti                                                                                         | 6,590   |
| #34 | electronic cigarette'/exp                                                                                                         | 8,116   |
| #33 | vaping'/exp                                                                                                                       | 3,322   |
| #32 | (pharmaco* NEAR/2 (nicotine OR tobacco OR smoking)):ab,ti                                                                         | 1,391   |
| #31 | ((nicotine OR tobacco) NEAR/2 (gum* OR lozenge* OR patch* OR spray*)):ab,ti                                                       | 3,027   |
| #30 | nicotine replacement':ab,ti                                                                                                       | 4,629   |
| #29 | nrt:ab,ti                                                                                                                         | 2,940   |
| #28 | nicotine chewing gum'/exp                                                                                                         | 2,966   |
| #27 | smoking cessation agents'/exp                                                                                                     | 40      |
| #26 | nicotinic agonists'/exp                                                                                                           | 25,924  |
| #25 | tobacco use cessation products'/exp                                                                                               | 2,966   |
| #24 | tobacco use cessation'/exp                                                                                                        | 62,328  |
| #23 | ((quit* OR stop* OR ceas* OR giv* OR abstain* OR abstinen* OR cessat* OR reduc*) NEAR/3 (smok* OR tobacco)):ab,ti                 | 63,027  |
| #22 | smoking reduction'/exp                                                                                                            | 297     |
| #21 | smoking cessation'/exp                                                                                                            | 62,328  |
| #20 | #1 OR #2 OR #3 OR #4 OR #5 OR #6 OR #7 OR #8 OR #9 OR #10 OR #11 OR #12 OR #13 OR #14 OR #15 OR #16 OR #17 OR #18 OR #19          | 494,723 |
| #19 | (organ NEAR/1 'space ssi*'):ab,ti                                                                                                 | 566     |
| #18 | (deep NEAR/2 ssi*'):ab,ti                                                                                                         | 709     |
| #17 | (superficial NEAR/2 ssi*'):ab,ti                                                                                                  | 727     |
| #16 | postoperative wound infection*':ab,ti                                                                                             | 2,167   |

|     |                                                                                                                                |         |
|-----|--------------------------------------------------------------------------------------------------------------------------------|---------|
| #15 | surgical site infection*:ab,ti                                                                                                 | 18,307  |
| #14 | surgical wound infection*:ab,ti                                                                                                | 1,740   |
| #13 | surgical infection*/exp                                                                                                        | 54,736  |
| #12 | non?union:ab,ti OR nonunion:ab,ti OR un?united:ab,ti OR ununited:ab,ti OR delayed?union:ab,ti OR union:ab,ti OR malunion:ab,ti | 88,415  |
| #11 | (fractur* NEAR/3 healing):ab,ti                                                                                                | 13,399  |
| #10 | fracture healing*/exp                                                                                                          | 55,249  |
| #9  | fracture reduction*:ab,ti                                                                                                      | 3,209   |
| #8  | skeletal fixation*:ab,ti                                                                                                       | 656     |
| #7  | fracture fixation*:ab,ti                                                                                                       | 4,059   |
| #6  | fracture fixation*/exp                                                                                                         | 97,671  |
| #5  | torsion fracture*:ab,ti                                                                                                        | 49      |
| #4  | spiral fracture*:ab,ti                                                                                                         | 420     |
| #3  | bone fracture*:ab,ti                                                                                                           | 15,462  |
| #2  | broken bone*:ab,ti                                                                                                             | 416     |
| #1  | fracture*/exp                                                                                                                  | 348,494 |

1

2 **S2.2.2c. Cochrane library database (year of 2021 to August 7<sup>th</sup>, 2021)**

| ID  | Search                                                                                                                   | Hits   |
|-----|--------------------------------------------------------------------------------------------------------------------------|--------|
| #1  | MeSH descriptor: [Fractures, Bone] explode all trees                                                                     | 6,415  |
| #2  | (Broken Bone*):ti,ab,kw                                                                                                  | 184    |
| #3  | (Bone Fracture*):ti,ab,kw                                                                                                | 11,248 |
| #4  | (Spiral Fracture*):ti,ab,kw                                                                                              | 59     |
| #5  | (Torsion Fracture*):ti,ab,kw                                                                                             | 54     |
| #6  | MeSH descriptor: [Fracture Fixation] explode all trees                                                                   | 1,829  |
| #7  | (Fracture Fixation*):ti,ab,kw                                                                                            | 4,126  |
| #8  | (Skeletal Fixation*):ti,ab,kw                                                                                            | 179    |
| #9  | (Fracture Reduction*):ti,ab,kw                                                                                           | 4,176  |
| #10 | MeSH descriptor: [Fracture Healing] explode all trees                                                                    | 545    |
| #11 | ((fractur* near/3 healing)):ti,ab,kw                                                                                     | 1,594  |
| #12 | ((non?union or nonunion or un?united or ununited or delayed?union or union or malunion)):ti,ab,kw                        | 3,605  |
| #13 | MeSH descriptor: [Surgical Wound Infection] explode all trees                                                            | 3,505  |
| #14 | (Surgical Wound Infection*):ti,ab,kw                                                                                     | 7,420  |
| #15 | (Surgical Site Infection*):ti,ab,kw                                                                                      | 3,903  |
| #16 | (Postoperative Wound Infection*):ti,ab,kw                                                                                | 5,826  |
| #17 | ((superficial near/2 SSI*)):ti,ab,kw                                                                                     | 122    |
| #18 | ((deep near/2 SSI*)):ti,ab,kw                                                                                            | 95     |
| #19 | ((Organ near/1 space SSI*)):ti,ab,kw                                                                                     | 91     |
| #20 | #1 or #2 or #3 or #4 or #5 or #6 or #7 or #8 or #9 or #10 or #11 or #12 or #13 or #14 or #15 or #16 or #17 or #18 or #19 | 28,087 |
| #21 | MeSH descriptor: [Smoking Cessation] explode all trees                                                                   | 4,217  |
| #22 | MeSH descriptor: [Smoking Reduction] explode all trees                                                                   | 27     |
| #23 | ((quit* or stop* or ceas* or giv* or abstain* or abstinen* or Cessat* or reduc*) NEAR/3 (smoke* or tobacco)):ti,ab,kw    | 5,304  |
| #24 | MeSH descriptor: [Tobacco Use Cessation Devices] explode all trees                                                       | 571    |
| #25 | MeSH descriptor: [Nicotine Chewing Gum] explode all trees                                                                | 16     |
| #26 | MeSH descriptor: [Nicotinic Agonists] explode all trees                                                                  | 748    |

|     |                                                                                                                                                                                                         |        |
|-----|---------------------------------------------------------------------------------------------------------------------------------------------------------------------------------------------------------|--------|
| #27 | (Tobacco Use Cessation Products):ti,ab,kw                                                                                                                                                               | 296    |
| #28 | (Nicotine near/2 patch*):ti,ab,kw                                                                                                                                                                       | 1,316  |
| #29 | (Nicotine near/2 delivery device*):ti,ab,kw                                                                                                                                                             | 106    |
| #30 | (nicotine near/2 nasal spray*):ti,ab,kw                                                                                                                                                                 | 97     |
| #31 | (smoking near/2 cessation product*):ti,ab,kw                                                                                                                                                            | 659    |
| #32 | (nicotine near/2 replacement):ti,ab,kw                                                                                                                                                                  | 1,871  |
| #33 | (nicotine near/2 lozenge*):ti,ab,kw                                                                                                                                                                     | 181    |
| #34 | (nicotine polacrilex):ti,ab,kw                                                                                                                                                                          | 50     |
| #35 | (nicotine near/2 inhal*):ti,ab,kw                                                                                                                                                                       | 151    |
| #36 | (nicotine near/2 chewing gum*):ti,ab,kw                                                                                                                                                                 | 142    |
| #37 | nicorette:ti,ab,kw                                                                                                                                                                                      | 97     |
| #38 | (nicotinic near/2 agonist*):ti,ab,kw                                                                                                                                                                    | 840    |
| #39 | (nicotine near/2 tablet*):ti,ab,kw                                                                                                                                                                      | 41     |
| #40 | (nicotine near/2 sublingual):ti,ab,kw                                                                                                                                                                   | 25     |
| #41 | NRT:ti,ab,kw                                                                                                                                                                                            | 954    |
| #42 | (nicotine near/3 therap*):ti,ab,kw                                                                                                                                                                      | 2,079  |
| #43 | MeSH descriptor: [Vaping] explode all trees                                                                                                                                                             | 60     |
| #44 | MeSH descriptor: [Electronic Nicotine Delivery Systems] explode all trees                                                                                                                               | 162    |
| #45 | (Cigarette* or e-cigarette*):ti,ab,kw                                                                                                                                                                   | 584    |
| #46 | (Electronic-Cigarette*):ti,ab,kw                                                                                                                                                                        | 463    |
| #47 | ((electron* NEAR/3 (cig* OR nicotine*))) :ti,ab,kw                                                                                                                                                      | 571    |
| #48 | (e-cig* or ecig*):ti,ab,kw                                                                                                                                                                              | 628    |
| #49 | (vape* or vaporizer* or vaporiser* or vapourizer* or vapouriser* or vaping*):ti,ab,kw                                                                                                                   | 2,394  |
| #50 | #21 or #22 or #23 or #24 or #25 or #26 or #27 or #28 or #29 or #30 or #31 or #32 or #33 or #34 or #35 or #36 or #37 or #38 or #39 or #40 or #41 or #42 or #43 or #44 or #45 or #46 or #47 or #48 or #49 | 12,110 |
| #51 | #20 and #50 with Publication Year from 2021 to 2021, in Trials                                                                                                                                          | 1      |

1

2 **S2.2.2d. CINAHL database (year of 2021 to August 7<sup>th</sup>, 2021)**

| #   | Query                                                                                                                                                                | Results |
|-----|----------------------------------------------------------------------------------------------------------------------------------------------------------------------|---------|
| S31 | S15 and S30 (Limiters - Published Date: 20210401-20210831)                                                                                                           | 8       |
| S30 | S16 or S17 or S18 or S19 or S20 or S21 or S22 or S23 or S24 or S25 or S26 or S27 or S28 or S29                                                                       | 32,207  |
| S29 | TI (vape\$ or vaporizer* or vaporiser* or vapourizer* or vapouriser* or vaping*) OR AB (vape\$ or vaporizer* or vaporiser* or vapourizer* or vapouriser* or vaping*) | 1,718   |
| S28 | TI (e-cig* or ecig* ) OR AB ( e-cig* or ecig* )                                                                                                                      | 3,922   |
| S27 | TI (electron* W3 (cig* or nicotine*)) OR AB (electron* W3 (cig* or nicotine*))                                                                                       | 2,625   |
| S26 | TI Electronic-Cigarette* OR AB Electronic-Cigarette*                                                                                                                 | 2,243   |
| S25 | TI (Ecigarette* OR e-cigarette* ) OR AB ( Ecigarette* OR e-cigarette*)                                                                                               | 3,779   |
| S24 | (MM "Electronic Cigarettes")                                                                                                                                         | 1,992   |
| S23 | (MM "Vaping")                                                                                                                                                        | 228     |
| S22 | TI (nicotine and (gum* or lozenge* or spray* or patch*)) OR AB (nicotine and (gum* or lozenge* or spray* or patch*))                                                 | 1,160   |
| S21 | TI nicotine replacement OR AB nicotine replacement                                                                                                                   | 1,872   |
| S20 | TI NRT OR AB NRT                                                                                                                                                     | 970     |
| S19 | (MH "Nicotine Chewing Gum" OR (MH "Nicotine Patch"))                                                                                                                 | 456     |
| S18 | (MH ("Nicotine Replacement Therapy") OR (MH "Tobacco Use Cessation Products+") OR (MH "Nicotinic Agonists+"))                                                        | 11,179  |



|     |                                                                                                                                                                                                                       |        |
|-----|-----------------------------------------------------------------------------------------------------------------------------------------------------------------------------------------------------------------------|--------|
| S17 | TI ((quit* or stop* or ceas* or giv* or abstain* or abstin* or Cessat* or reduc*) W3 (smok* or to bacco)) OR AB ((quit* or stop* or ceas* or giv* or abstain* or abstin* or Cessat* or reduc*) W3 (smok* or tobacco)) | 13,671 |
| S16 | (MM "Smoking Cessation")                                                                                                                                                                                              | 14,364 |
| S15 | S1 or S2 or S3 or S4 or S5 or S6 or S7 or S8 or S9 or S10 or S11 or S12 or S13 or S14                                                                                                                                 | 51,061 |
| S14 | TI Organ w1 space SSI* or AB Organ w1 space SSI*                                                                                                                                                                      | 111    |
| S13 | TI deep w2 SSI* or AB deep w2 SSI*                                                                                                                                                                                    | 168    |
| S12 | TI superficial w2 SSI* or AB superficial w2 SSI*                                                                                                                                                                      | 160    |
| S11 | TI Postoperative Wound Infection* or AB Postoperative Wound Infection*                                                                                                                                                | 319    |
| S10 | TI Surgical Site Infection* or AB Surgical Site Infection*                                                                                                                                                            | 5,925  |
| S9  | TI Surgical Wound Infection* or AB Surgical Wound Infection*                                                                                                                                                          | 352    |
| S8  | (MM "Surgical Wound Infection")                                                                                                                                                                                       | 7,563  |
| S7  | TI ( non?union or nonunion or un?united or ununited or delayed?union or union or malunion ) OR A B ( non?union or nonunion or un?united or ununited or delayed?union or union or malunion )                           | 23,757 |
| S6  | TI fractur* w3 healing OR AB fractur* w3 healing                                                                                                                                                                      | 2,083  |
| S5  | (MM "Fracture Healing")                                                                                                                                                                                               | 1,801  |
| S4  | TI Fracture Fixation* or AB Fracture Fixation* or TI Skeletal Fixation* or AB Skeletal Fixation* or TI Fracture Reduction* or AB Fracture Reduction*                                                                  | 2,369  |
| S3  | (MH "Fracture Fixation+")                                                                                                                                                                                             | 16,321 |
| S2  | TI Broken Bone* or AB Broken Bone* or TI Bone Fracture* or AB Bone Fracture* or TI Spiral Fracture* or AB Spiral Fracture* or TI Torsion Fracture* or AB Torsion Fracture*                                            | 2,810  |
| S1  | (MM "Carpal Fractures")                                                                                                                                                                                               | 119    |

1

2 **S2.2.2e. AMED database (year of 2021 to August 7<sup>th</sup>, 2021)**

| #  | Searches                                                                                                                                        | Results |
|----|-------------------------------------------------------------------------------------------------------------------------------------------------|---------|
| 1  | exp Fracture Fixation/                                                                                                                          | 843     |
| 2  | (Broken Bone* or Bone Fracture* or Spiral Fracture* or Torsion Fracture*).ab,ti.                                                                | 147     |
| 3  | (Fracture Fixation* or Skeletal Fixation* or Fracture Reduction*).ab,ti                                                                         | 158     |
| 4  | exp Fracture Healing/                                                                                                                           | 92      |
| 5  | (((fractur* adj3 healing) or healing) adj3 fractur*).ab,ti.                                                                                     | 214     |
| 6  | (non?union or nonunion or un?united or ununited or delayed?union or union or malunion).ab,ti.                                                   | 1,075   |
| 7  | Surgical Wound Infection*.ab,ti.                                                                                                                | 1       |
| 8  | Surgical Surgical Site Infection*.ab,ti.Site Infection*.ab,ti                                                                                   | 30      |
| 9  | Postoperative Wound Infection*.ab,ti.                                                                                                           | 10      |
| 10 | (((superficial adj2 SSI*) or SSI*) adj2 superficial).ab,ti.                                                                                     | 1       |
| 11 | (((deep adj2 SSI*) or SSI*) adj2 deep).ab,ti.                                                                                                   | 1       |
| 12 | (((Organ adj1 space SSI*) or space) adj1 Organ SSI*).ab,ti.                                                                                     | 0       |
| 13 | 1 or 2 or 3 or 4 or 5 or 6 or 7 or 8 or 9 or 10 or 11 or 12                                                                                     | 2,167   |
| 14 | Smoking Cessation.mp. [mp=abstract, heading words, title]                                                                                       | 344     |
| 15 | Smoking Reduction.mp. [mp=abstract, heading words, title]                                                                                       | 3       |
| 16 | ((quit* or stop* or ceas* or giv* or abstain* or abstin* or Cessat* or reduc*) and (smok* or tobac co)).mp. [mp=abstract, heading words, title] | 652     |
| 17 | "Tobacco Use Cessation"/                                                                                                                        | 0       |
| 18 | "Tobacco Use Cessation Products"/                                                                                                               | 0       |
| 19 | Nicotinic Agonists/                                                                                                                             | 0       |
| 20 | Smoking Cessation Agents/                                                                                                                       | 0       |
| 21 | Nicotine Chewing Gum/                                                                                                                           | 0       |

|    |                                                                                                    |     |
|----|----------------------------------------------------------------------------------------------------|-----|
| 22 | NRT.ti,ab.                                                                                         | 8   |
| 23 | nicotine replacement.tw.                                                                           | 18  |
| 24 | ((nicotine or tobacco) adj2 (gum* or lozenge* or patch* or spray*).tw.                             | 11  |
| 25 | (pharmaco* adj2 (nicotine or tobacco or smoking)).tw.                                              | 10  |
| 26 | (ecigarette* or e cigarette*).ab,ti.                                                               | 7   |
| 27 | electronic cigarette*.ab,ti.                                                                       | 2   |
| 28 | (electron* adj3 (cig* or nicotine*)).ab,ti.                                                        | 5   |
| 29 | (e cig* or ecig*).ab,ti.                                                                           | 7   |
| 30 | (vape* or vaporizer* or vaporiser* or vapourizer* or vapouriser* or vaping*).ab,ti.                | 6   |
| 31 | 14 or 15 or 16 or 17 or 18 or 19 or 20 or 21 or 22 or 23 or 24 or 25 or 26 or 27 or 28 or 29 or 30 | 667 |
| 32 | 13 and 31                                                                                          | 21  |
| 33 | limit 32 to yr="2021-Current"                                                                      | 0   |

1

2 **S2.3. Search strategies for the impacts of preoperative smoking cessation time, NRT, and vaping on bone healing**

3

4 **S2.3.1. The first search strategy**

5 **S2.3.1a. MEDLINE database via Ovid (inception of database to April 23<sup>rd</sup>, 2021)**

| #  | Searches                                                                                                                  | Results |
|----|---------------------------------------------------------------------------------------------------------------------------|---------|
| 1  | exp Smoking Cessation/                                                                                                    | 29,685  |
| 2  | exp Smoking Reduction/                                                                                                    | 82      |
| 3  | ((quit\$ or stop\$ or ceas\$ or giv\$ or abstain\$ or abstinen\$ or Cessat\$ or reduc\$) adj3 (smok\$ or tobacco)).ti,ab. | 47,550  |
| 4  | "Tobacco Use Cessation"/                                                                                                  | 1,241   |
| 5  | "Tobacco Use Cessation Products"/                                                                                         | 1,970   |
| 6  | Nicotinic Agonists/                                                                                                       | 7,440   |
| 7  | Smoking Cessation Agents/                                                                                                 | 211     |
| 8  | Nicotine Chewing Gum/                                                                                                     | 26      |
| 9  | NRT.ti,ab.                                                                                                                | 2,182   |
| 10 | nicotine replacement.tw,kf.                                                                                               | 3,608   |
| 11 | ((nicotine or tobacco) adj2 (gum* or lozenge* or patch* or spray*).tw,kf.                                                 | 2,483   |
| 12 | (pharmaco* adj2 (nicotine or tobacco or smoking)).tw,kf.                                                                  | 1,138   |
| 13 | exp Vaping/                                                                                                               | 1,670   |
| 14 | exp Electronic Nicotine Delivery Systems/                                                                                 | 4,363   |
| 15 | (Ecigarette\$ or e-cigarette\$).ab,ti.                                                                                    | 5,142   |
| 16 | Electronic-Cigarette\$.ab,ti.                                                                                             | 3,322   |
| 17 | (electron* adj3 (cig\$ or nicotine\$)).ab,ti.                                                                             | 3,935   |
| 18 | (e-cig\$ or ecig\$).ti,ab.                                                                                                | 5,407   |
| 19 | (vape\$ or vaporizer\$ or vaporiser\$ or vapourizer\$ or vapouriser\$ or vaping\$).ti,ab.                                 | 3,378   |
| 20 | 1 or 2 or 3 or 4 or 5 or 6 or 7 or 8 or 9 or 10 or 11 or 12 or 13 or 14 or 15 or 16 or 17 or 18 or 19                     | 70,208  |
| 21 | fusion.ab,ti.                                                                                                             | 205,233 |
| 22 | exp Spinal Fusion/                                                                                                        | 26,584  |
| 23 | interbody.ab,ti.                                                                                                          | 6,774   |
| 24 | Spondylodes*.ab,ti.                                                                                                       | 748     |

|    |                      |         |
|----|----------------------|---------|
| 25 | 21 or 22 or 23 or 24 | 214,524 |
| 26 | exp Osteotomy/       | 36,408  |
| 27 | Osteotomy,Le Fort/   | 2,242   |
| 28 | gonarthrosis\$.tw.   | 1,070   |
| 29 | osteotom\$.tw.       | 34,700  |
| 30 | 26 or 27 or 28 or 29 | 50,185  |
| 31 | exp Arthrodesis/     | 35,822  |
| 32 | Arthrodes*.ab,ti.    | 12,634  |
| 33 | 31 or 32             | 40,346  |
| 34 | 25 or 30 or 33       | 271,936 |
| 35 | 20 and 34            | 111     |

1

2 **S2.3.1b. EMBASE database (inception of database to April 24<sup>th</sup>, 2021)**

| No. | Query                                                                                                                    | Results |
|-----|--------------------------------------------------------------------------------------------------------------------------|---------|
| #34 | #20 AND #33                                                                                                              | 214     |
| #33 | #25 OR #29 OR #32                                                                                                        | 330,752 |
| #32 | #30 OR #31                                                                                                               | 52,605  |
| #31 | arthrodes*.ab,ti                                                                                                         | 15,260  |
| #30 | 'arthrodesis'/exp                                                                                                        | 48,953  |
| #29 | #26 OR #27 OR #28                                                                                                        | 58,834  |
| #28 | 'osteotomy'/exp                                                                                                          | 49,720  |
| #27 | osteotom*:ab,ti                                                                                                          | 40,830  |
| #26 | gonarthrosis*:ab,ti                                                                                                      | 1,605   |
| #25 | #21 OR #22 OR #23 OR #24                                                                                                 | 261,726 |
| #24 | spondylodes*:ab,ti                                                                                                       | 1,021   |
| #23 | interbody:ab,ti                                                                                                          | 8,580   |
| #22 | 'spine fusion'/exp                                                                                                       | 33,068  |
| #21 | fusion:ab,ti                                                                                                             | 252,103 |
| #20 | #1 OR #2 OR #3 OR #4 OR #5 OR #6 OR #7 OR #8 OR #9 OR #10 OR #11 OR #12 OR #13 OR #14 OR #15 OR #16 OR #17 OR #18 OR #19 | 116,591 |
| #19 | vape*:ab,ti OR vaporizer*:ab,ti OR vaporiser*:ab,ti OR vapourizer*:ab,ti OR vapouriser*:ab,ti OR vaping*:ab,ti           | 4,229   |
| #18 | 'e cig*':ab,ti OR ecig*:ab,ti                                                                                            | 6,596   |
| #17 | (electron* NEAR/3 (cig* OR nicotine*)):ab,ti                                                                             | 4,720   |
| #16 | 'electronic cigarette*':ab,ti                                                                                            | 4,023   |
| #15 | ecigarette*:ab,ti OR 'e cigarette*':ab,ti                                                                                | 6,234   |
| #14 | 'electronic cigarette'/exp                                                                                               | 7,737   |
| #13 | 'vaping'/exp                                                                                                             | 2,989   |
| #12 | (pharmaco* NEAR/2 (nicotine OR tobacco OR smoking)):ab,ti                                                                | 1,381   |
| #11 | ((nicotine OR tobacco) NEAR/2 (gum* OR lozenge* OR patch* OR spray*)):ab,ti                                              | 2,997   |
| #10 | 'nicotine replacement':ab,ti                                                                                             | 4,564   |
| #9  | nrt:ab,ti                                                                                                                | 2,890   |
| #8  | 'nicotine chewing gum'/exp                                                                                               | 2,956   |
| #7  | 'smoking cessation agents'/exp                                                                                           | 36      |
| #6  | 'nicotinic agonists'/exp                                                                                                 | 25,417  |
| #5  | 'tobacco use cessation products'/exp                                                                                     | 2,956   |

|    |                                                                                                                   |        |
|----|-------------------------------------------------------------------------------------------------------------------|--------|
| #4 | 'tobacco use cessation'/exp                                                                                       | 61,602 |
| #3 | ((quit* OR stop* OR ceas* OR giv* OR abstain* OR abstinen* OR cessat* OR reduc*) NEAR/3 (smok* OR tobacco)):ab,ti | 62,187 |
| #2 | 'smoking reduction'/exp                                                                                           | 278    |
| #1 | 'smoking cessation'/exp                                                                                           | 61,602 |

1

2

### S2.3.1c. Cochrane library database (inception of database to April 24<sup>th</sup>, 2021)

| ID  | Search                                                                                                                                                                                         | Hits   |
|-----|------------------------------------------------------------------------------------------------------------------------------------------------------------------------------------------------|--------|
| #1  | MeSH descriptor: [Smoking Cessation] explode all trees                                                                                                                                         | 4,145  |
| #2  | MeSH descriptor: [Smoking Reduction] explode all trees                                                                                                                                         | 25     |
| #3  | ((quit* or stop* or ceas* or giv* or abstain* or abstinen* or Cessat* or reduc*) NEAR/3 (smoke* or tobacco)):ti,ab,kw                                                                          | 5,174  |
| #4  | MeSH descriptor: [Tobacco Use Cessation Devices] explode all trees                                                                                                                             | 550    |
| #5  | MeSH descriptor: [Nicotine Chewing Gum] explode all trees                                                                                                                                      | 14     |
| #6  | MeSH descriptor: [Nicotinic Agonists] explode all trees                                                                                                                                        | 741    |
| #7  | (Tobacco Use Cessation Products):ti,ab,kw                                                                                                                                                      | 287    |
| #8  | (Nicotine near/2 patch*):ti,ab,kw                                                                                                                                                              | 1,299  |
| #9  | (Nicotine near/2 delivery device*):ti,ab,kw                                                                                                                                                    | 103    |
| #10 | (nicotine near/2 nasal spray*):ti,ab,kw                                                                                                                                                        | 97     |
| #11 | (smoking near/2 cessation product*):ti,ab,kw                                                                                                                                                   | 639    |
| #12 | (nicotine near/2 replacement):ti,ab,kw                                                                                                                                                         | 1,837  |
| #13 | (nicotine near/2 lozenge*):ti,ab,kw                                                                                                                                                            | 177    |
| #14 | (nicotine polacrilex):ti,ab,kw                                                                                                                                                                 | 50     |
| #15 | (nicotine near/2 inhal*):ti,ab,kw                                                                                                                                                              | 150    |
| #16 | (nicotine near/2 chewing gum*):ti,ab,kw                                                                                                                                                        | 140    |
| #17 | nicorette:ti,ab,kw                                                                                                                                                                             | 97     |
| #18 | (nicotinic near/2 agonist*):ti,ab,kw                                                                                                                                                           | 831    |
| #19 | (nicotine near/2 tablet*):ti,ab,kw                                                                                                                                                             | 41     |
| #20 | (nicotine near/2 sublingual):ti,ab,kw                                                                                                                                                          | 25     |
| #21 | NRT:ti,ab,kw                                                                                                                                                                                   | 926    |
| #22 | (nicotine near/3 therap*):ti,ab,kw                                                                                                                                                             | 2,045  |
| #23 | MeSH descriptor: [Vaping] explode all trees                                                                                                                                                    | 52     |
| #24 | MeSH descriptor: [Electronic Nicotine Delivery Systems] explode all trees                                                                                                                      | 148    |
| #25 | (E-cigarette* or e-cigarette*):ti,ab,kw                                                                                                                                                        | 542    |
| #26 | (Electronic-Cigarette*):ti,ab,kw                                                                                                                                                               | 441    |
| #27 | ((electron* NEAR/3 (cig* OR nicotine*)):ti,ab,kw                                                                                                                                               | 543    |
| #28 | (e-cig* or ecig*):ti,ab,kw                                                                                                                                                                     | 587    |
| #29 | (vape* or vaporizer* or vaporiser* or vapourizer* or vapouriser* or vaping*):ti,ab,kw                                                                                                          | 2,341  |
| #30 | #1 or #2 or #3 or #4 or #5 or #6 or #7 or #8 or #9 or #10 or #11 or #12 or #13 or #14 or #15 or #16 or #17 or #18 or #19 or #20 or #21 or #22 or #23 or #24 or #25 or #26 or #27 or #28 or #29 | 11,862 |
| #31 | fusion:ti,ab,kw                                                                                                                                                                                | 7,274  |
| #32 | MeSH descriptor: [Spinal Fusion] explode all trees                                                                                                                                             | 963    |
| #33 | Interbody:ti,ab,kw                                                                                                                                                                             | 819    |
| #34 | (Spondylodesis or Spondylodeses):ti,ab,kw                                                                                                                                                      | 57     |
| #35 | #31 or #32 or #33 or #34                                                                                                                                                                       | 7,306  |
| #36 | MeSH descriptor: [Osteotomy] explode all trees                                                                                                                                                 | 767    |

|     |                                                  |       |
|-----|--------------------------------------------------|-------|
| #37 | osteotom*:ti,ab,kw                               | 2,063 |
| #38 | #36 or #37                                       | 2,162 |
| #39 | MeSH descriptor: [Arthrodesis] explode all trees | 1,035 |
| #40 | Arthrodes*:ti,ab,kw                              | 495   |
| #41 | #39 or #40                                       | 1,382 |
| #42 | #35 or #38 or #41                                | 9,609 |
| #43 | #30 and #42 in Trials                            | 13    |

1

2 **S2.3.1d. CINAHL database (inception of database to April 24<sup>th</sup>, 2021)**

| #   | Query                                                                                                                                                                                                                    | Results |
|-----|--------------------------------------------------------------------------------------------------------------------------------------------------------------------------------------------------------------------------|---------|
| S29 | S15 and S28                                                                                                                                                                                                              | 35      |
| S28 | S20 or S24 or S27                                                                                                                                                                                                        | 35,349  |
| S27 | S25 or S26                                                                                                                                                                                                               | 4,686   |
| S26 | TI (Arthrodes*) OR AB (Arthrodes*)                                                                                                                                                                                       | 3,938   |
| S25 | (MH "Arthrodesis")                                                                                                                                                                                                       | 2,883   |
| S24 | S21 or S22 or S23                                                                                                                                                                                                        | 9,071   |
| S23 | TX (osteotom\$)                                                                                                                                                                                                          | 10      |
| S22 | TX (gonarthrosis\$)                                                                                                                                                                                                      | 412     |
| S21 | (MH "Osteotomy")                                                                                                                                                                                                         | 8,711   |
| S20 | S16 or S17 or S18 or S19                                                                                                                                                                                                 | 24,067  |
| S19 | TI (Spondylodes*) OR AB (Spondylodes*)                                                                                                                                                                                   | 77      |
| S18 | TI (interbody) OR AB (interbody)                                                                                                                                                                                         | 2,272   |
| S17 | (MH "Spinal Fusion")                                                                                                                                                                                                     | 10,181  |
| S16 | TI (fusion) OR AB (fusion)                                                                                                                                                                                               | 20,583  |
| S15 | S1 or S2 or S3 or S4 or S5 or S6 or S7 or S8 or S9 or S10 or S11 or S12 or S13 or S14                                                                                                                                    | 31,638  |
| S14 | TI (vape\$ or vaporizer* or vaporiser* or vapourizer* or vapouriser* or vaping*) OR AB (vape\$ or vaporizer* or vaporiser* or vapourizer* or vapouriser* or vaping*)                                                     | 1,625   |
| S13 | TI (e-cig* or ecig* ) OR AB ( e-cig* or ecig* )                                                                                                                                                                          | 3,757   |
| S12 | TI (electron* W3 (cig* or nicotine*)) OR AB (electron* W3 (cig* or nicotine*))                                                                                                                                           | 2,538   |
| S11 | TI Electronic-Cigarette* OR AB Electronic-Cigarette*                                                                                                                                                                     | 2,179   |
| S10 | TI (Ecigarette* OR e-cigarette* ) OR AB ( Ecigarette* OR e-cigarette*)                                                                                                                                                   | 3,615   |
| S9  | (MM "Electronic Cigarettes")                                                                                                                                                                                             | 1,919   |
| S8  | (MM "Vaping")                                                                                                                                                                                                            | 197     |
| S7  | TI (nicotine and (gum* or lozenge* or spray* or patch*)) OR AB (nicotine and (gum* or lozenge* or spray* or patch*))                                                                                                     | 1,150   |
| S6  | TI nicotine replacement OR AB nicotine replacement                                                                                                                                                                       | 1,836   |
| S5  | TI NRT OR AB NRT                                                                                                                                                                                                         | 947     |
| S4  | (MH "Nicotine Chewing Gum") OR (MH "Nicotine Patch")                                                                                                                                                                     | 454     |
| S3  | (MH "Nicotine Replacement Therapy") OR (MH "Tobacco Use Cessation Products+") OR (MH "Nicotinic Agonists+")                                                                                                              | 10,955  |
| S2  | TI ((quit* or stop* or ceas* or giv* or abstain* or abstinen* or Cessat* or reduc*) W3 (smok* or tobacco)) OR AB ((quit* or stop* or ceas* or giv* or abstain* or abstinen* or Cessat* or reduc*) W3 (smok* or tobacco)) | 13,456  |
| S1  | (MM "Smoking Cessation")                                                                                                                                                                                                 | 14,099  |

3

4 **S2.3.1e. AMED database (inception of database to April 27<sup>th</sup>, 2021)**

| #  | Searches                                                                                                                                         | Results |
|----|--------------------------------------------------------------------------------------------------------------------------------------------------|---------|
| 1  | Smoking Cessation.mp. [mp=abstract, heading words, title]                                                                                        | 343     |
| 2  | Smoking Reduction.mp. [mp=abstract, heading words, title]                                                                                        | 3       |
| 3  | ((quit* or stop* or ceas* or giv* or abstain* or abstinen* or Cessat* or reduc*) and (smok* or tobacco)).mp. [mp=abstract, heading words, title] | 650     |
| 4  | "Tobacco Use Cessation"/                                                                                                                         | 0       |
| 5  | "Tobacco Use Cessation Products"/                                                                                                                | 0       |
| 6  | Nicotinic Agonists/                                                                                                                              | 0       |
| 7  | Smoking Cessation Agents/                                                                                                                        | 0       |
| 8  | Nicotine Chewing Gum/                                                                                                                            | 0       |
| 9  | NRT.ti,ab.                                                                                                                                       | 8       |
| 10 | nicotine replacement.tw.                                                                                                                         | 18      |
| 11 | ((nicotine or tobacco) adj2 (gum* or lozenge* or patch* or spray*)).tw.                                                                          | 11      |
| 12 | (pharmaco* adj2 (nicotine or tobacco or smoking)).tw.                                                                                            | 10      |
| 13 | (ecigarette* or e cigarette*).ab,ti.                                                                                                             | 7       |
| 14 | electronic cigarette*.ab,ti.                                                                                                                     | 2       |
| 15 | (electron* adj3 (cig* or nicotine*)).ab,ti.                                                                                                      | 5       |
| 16 | (e cig* or ecig*).ab,ti.                                                                                                                         | 7       |
| 17 | (vape* or vaporizer* or vaporiser* or vapourizer* or vapouriser* or vaping*).ab,ti.                                                              | 6       |
| 18 | 1 or 2 or 3 or 4 or 5 or 6 or 7 or 8 or 9 or 10 or 11 or 12 or 13 or 14 or 15 or 16 or 17                                                        | 665     |
| 19 | fusion.ab,ti.                                                                                                                                    | 1,122   |
| 20 | exp Spinal Fusion/                                                                                                                               | 202     |
| 21 | interbody.ab,ti.                                                                                                                                 | 82      |
| 22 | Spondylodes*.ab,ti.                                                                                                                              | 12      |
| 23 | 19 or 20 or 21 or 22                                                                                                                             | 1,174   |
| 24 | exp Osteotomy/                                                                                                                                   | 1,020   |
| 25 | Osteotomy,Le Fort/                                                                                                                               | 0       |
| 26 | gonarthrosis\$.tw.                                                                                                                               | 41      |
| 27 | osteotom\$.tw.                                                                                                                                   | 1,446   |
| 28 | 24 or 25 or 26 or 27                                                                                                                             | 1,484   |
| 29 | exp Arthrodesis/                                                                                                                                 | 1,242   |
| 30 | Arthrodes*.ab,ti.                                                                                                                                | 1,306   |
| 31 | 29 or 30                                                                                                                                         | 1,635   |
| 32 | 23 or 28 or 31                                                                                                                                   | 3,431   |
| 33 | 18 and 32                                                                                                                                        | 11      |

1

## 2 S2.3.2. The second search strategy (the first updated search)

### 3 S2.3.2a. MEDLINE database via Ovid (year of 2021 to August 6<sup>th</sup>, 2021)

| # | Searches                                                                                                                  | Results |
|---|---------------------------------------------------------------------------------------------------------------------------|---------|
| 1 | exp Smoking Cessation/                                                                                                    | 30,268  |
| 2 | exp Smoking Reduction/                                                                                                    | 90      |
| 3 | ((quit\$ or stop\$ or ceas\$ or giv\$ or abstain\$ or abstinen\$ or Cessat\$ or reduc\$) adj3 (smok\$ or tobacco)).ti,ab. | 48,336  |
| 4 | "Tobacco Use Cessation"/                                                                                                  | 1,285   |
| 5 | "Tobacco Use Cessation Products"/                                                                                         | 2,065   |

|    |                                                                                                       |         |
|----|-------------------------------------------------------------------------------------------------------|---------|
| 6  | Nicotinic Agonists/                                                                                   | 7,515   |
| 7  | Smoking Cessation Agents/                                                                             | 227     |
| 8  | Nicotine Chewing Gum/                                                                                 | 27      |
| 9  | NRT.ti,ab.                                                                                            | 2,237   |
| 10 | nicotine replacement.tw,kf.                                                                           | 3,688   |
| 11 | ((nicotine or tobacco) adj2 (gum* or lozenge* or patch* or spray*)).tw,kf.                            | 2,503   |
| 12 | (pharmaco* adj2 (nicotine or tobacco or smoking)).tw,kf.                                              | 1,154   |
| 13 | exp Vaping/                                                                                           | 2,109   |
| 14 | exp Electronic Nicotine Delivery Systems/                                                             | 5,020   |
| 15 | (Ecigarette\$ or e-cigarette\$).ab,ti.                                                                | 5,442   |
| 16 | Electronic-Cigarette\$.ab,ti.                                                                         | 3,476   |
| 17 | (electron* adj3 (cig\$ or nicotine\$)).ab,ti.                                                         | 4,139   |
| 18 | (e-cig\$ or ecig\$).ti,ab.                                                                            | 5,722   |
| 19 | (vape\$ or vaporizer\$ or vaporiser\$ or vapourizer\$ or vapouriser\$ or vaping\$).ti,ab.             | 3,598   |
| 20 | 1 or 2 or 3 or 4 or 5 or 6 or 7 or 8 or 9 or 10 or 11 or 12 or 13 or 14 or 15 or 16 or 17 or 18 or 19 | 71,553  |
| 21 | fusion.ab,ti.                                                                                         | 208,898 |
| 22 | exp Spinal Fusion/                                                                                    | 27,565  |
| 23 | interbody.ab,ti.                                                                                      | 6,984   |
| 24 | Spondylodes*.ab,ti.                                                                                   | 752     |
| 25 | 21 or 22 or 23 or 24                                                                                  | 218,416 |
| 26 | exp Osteotomy/                                                                                        | 37,009  |
| 27 | Osteotomy,Le Fort/                                                                                    | 2,282   |
| 28 | gonarthrosis\$.tw.                                                                                    | 1,075   |
| 29 | osteotom\$.tw.                                                                                        | 35,309  |
| 30 | 26 or 27 or 28 or 29                                                                                  | 50,931  |
| 31 | exp Arthrodesis/                                                                                      | 36,942  |
| 32 | Arthrodes*.ab,ti.                                                                                     | 12,841  |
| 33 | 31 or 32                                                                                              | 41,520  |
| 34 | 25 or 30 or 33                                                                                        | 276,640 |
| 35 | 20 and 34                                                                                             | 115     |
| 36 | limit 35 to yr="2021 -Current"                                                                        | 9       |

1

2 **S2.3.2b. EMBASE database (year of 2021 to August 7<sup>th</sup>, 2021)**

| No. | Query                          | Results |
|-----|--------------------------------|---------|
| #35 | #20 AND #33 AND [2021-2021]/py | 15      |
| #34 | #20 AND #33                    | 218     |
| #33 | #25 OR #29 OR #32              | 335,959 |
| #32 | #30 OR #31                     | 53,558  |
| #31 | arthrodes*.ab,ti               | 15,434  |
| #30 | 'arthrodesis'/exp              | 49,888  |
| #29 | #26 OR #27 OR #28              | 59,753  |
| #28 | 'osteotomy'/exp                | 50,526  |
| #27 | osteotom*.ab,ti                | 41,419  |

|     |                                                                                                                          |         |
|-----|--------------------------------------------------------------------------------------------------------------------------|---------|
| #26 | gonarthrosis*:ab,ti                                                                                                      | 1,614   |
| #25 | #21 OR #22 OR #23 OR #24                                                                                                 | 265,925 |
| #24 | spondylodes*:ab,ti                                                                                                       | 1,025   |
| #23 | interbody:ab,ti                                                                                                          | 8,762   |
| #22 | 'spine fusion'/exp                                                                                                       | 33,760  |
| #21 | fusion:ab,ti                                                                                                             | 256,107 |
| #20 | #1 OR #2 OR #3 OR #4 OR #5 OR #6 OR #7 OR #8 OR #9 OR #10 OR #11 OR #12 OR #13 OR #14 OR #15 OR #16 OR #17 OR #18 OR #19 | 118,655 |
| #19 | vape*:ab,ti OR vaporizer*:ab,ti OR vaporiser*:ab,ti OR vapourizer*:ab,ti OR vapouriser*:ab,ti OR vaping*:ab,ti           | 4,525   |
| #18 | 'e cig*':ab,ti OR ecig*:ab,ti                                                                                            | 6,969   |
| #17 | (electron* NEAR/3 (cig* OR nicotine*)):ab,ti                                                                             | 4,943   |
| #16 | 'electronic cigarette*':ab,ti                                                                                            | 4,199   |
| #15 | ecigarette*:ab,ti OR 'e cigarette*':ab,ti                                                                                | 6,590   |
| #14 | 'electronic cigarette'/exp                                                                                               | 8,116   |
| #13 | 'vaping'/exp                                                                                                             | 3,322   |
| #12 | (pharmaco* NEAR/2 (nicotine OR tobacco OR smoking)):ab,ti                                                                | 1,391   |
| #11 | ((nicotine OR tobacco) NEAR/2 (gum* OR lozenge* OR patch* OR spray*)):ab,ti                                              | 3,027   |
| #10 | 'nicotine replacement':ab,ti                                                                                             | 4,629   |
| #9  | nrt:ab,ti                                                                                                                | 2,940   |
| #8  | 'nicotine chewing gum'/exp                                                                                               | 2,966   |
| #7  | 'smoking cessation agents'/exp                                                                                           | 40      |
| #6  | 'nicotinic agonists'/exp                                                                                                 | 25,924  |
| #5  | 'tobacco use cessation products'/exp                                                                                     | 2,966   |
| #4  | 'tobacco use cessation'/exp                                                                                              | 62,328  |
| #3  | ((quit* OR stop* OR ceas* OR giv* OR abstain* OR abstinen* OR cessat* OR reduc*) NEAR/3 (smok* OR tobacco)):ab,ti        | 63,027  |
| #2  | 'smoking reduction'/exp                                                                                                  | 297     |
| #1  | 'smoking cessation'/exp                                                                                                  | 62,328  |

1

## 2 S2.3.2c. Cochrane library database (year of 2021 to August 7<sup>th</sup>, 2021)

| ID  | Search                                                                                                                | Hits  |
|-----|-----------------------------------------------------------------------------------------------------------------------|-------|
| #1  | MeSH descriptor: [Smoking Cessation] explode all trees                                                                | 4,217 |
| #2  | MeSH descriptor: [Smoking Reduction] explode all trees                                                                | 27    |
| #3  | ((quit* or stop* or ceas* or giv* or abstain* or abstinen* or Cessat* or reduc*) NEAR/3 (smoke* or tobacco)):ti,ab,kw | 5,304 |
| #4  | MeSH descriptor: [Tobacco Use Cessation Devices] explode all trees                                                    | 571   |
| #5  | MeSH descriptor: [Nicotine Chewing Gum] explode all trees                                                             | 16    |
| #6  | MeSH descriptor: [Nicotinic Agonists] explode all trees                                                               | 748   |
| #7  | (Tobacco Use Cessation Products):ti,ab,kw                                                                             | 296   |
| #8  | (Nicotine near/2 patch*):ti,ab,kw                                                                                     | 1,316 |
| #9  | (Nicotine near/2 delivery device*):ti,ab,kw                                                                           | 106   |
| #10 | (nicotine near/2 nasal spray*):ti,ab,kw                                                                               | 97    |
| #11 | (smoking near/2 cessation product*):ti,ab,kw                                                                          | 659   |
| #12 | (nicotine near/2 replacement):ti,ab,kw                                                                                | 1,871 |
| #13 | (nicotine near/2 lozenge*):ti,ab,kw                                                                                   | 181   |
| #14 | (nicotine polacrilex):ti,ab,kw                                                                                        | 50    |



|     |                                                                                                                                                                                                |        |
|-----|------------------------------------------------------------------------------------------------------------------------------------------------------------------------------------------------|--------|
| #15 | (nicotine near/2 inhal*):ti,ab,kw                                                                                                                                                              | 151    |
| #16 | (nicotine near/2 chewing gum*):ti,ab,kw                                                                                                                                                        | 142    |
| #17 | nicorette:ti,ab,kw                                                                                                                                                                             | 97     |
| #18 | (nicotinic near/2 agonist*):ti,ab,kw                                                                                                                                                           | 840    |
| #19 | (nicotine near/2 tablet*):ti,ab,kw                                                                                                                                                             | 41     |
| #20 | (nicotine near/2 sublingual):ti,ab,kw                                                                                                                                                          | 25     |
| #21 | NRT:ti,ab,kw                                                                                                                                                                                   | 954    |
| #22 | (nicotine near/3 therap*):ti,ab,kw                                                                                                                                                             | 2,079  |
| #23 | MeSH descriptor: [Vaping] explode all trees                                                                                                                                                    | 60     |
| #24 | MeSH descriptor: [Electronic Nicotine Delivery Systems] explode all trees                                                                                                                      | 162    |
| #25 | (Cigarette* or e-cigarette*):ti,ab,kw                                                                                                                                                          | 584    |
| #26 | (Electronic-Cigarette*):ti,ab,kw                                                                                                                                                               | 463    |
| #27 | ((electron* NEAR/3 (cig* OR nicotine*)):ti,ab,kw                                                                                                                                               | 571    |
| #28 | (e-cig* or ecig*):ti,ab,kw                                                                                                                                                                     | 628    |
| #29 | (vape* or vaporizer* or vaporiser* or vapourizer* or vapouriser* or vaping*):ti,ab,kw                                                                                                          | 2,394  |
| #30 | #1 or #2 or #3 or #4 or #5 or #6 or #7 or #8 or #9 or #10 or #11 or #12 or #13 or #14 or #15 or #16 or #17 or #18 or #19 or #20 or #21 or #22 or #23 or #24 or #25 or #26 or #27 or #28 or #29 | 12,110 |
| #31 | fusion:ti,ab,kw                                                                                                                                                                                | 7,497  |
| #32 | MeSH descriptor: [Spinal Fusion] explode all trees                                                                                                                                             | 988    |
| #33 | Interbody:ti,ab,kw                                                                                                                                                                             | 835    |
| #34 | (Spondylodesis or Spondylodeses):ti,ab,kw                                                                                                                                                      | 60     |
| #35 | #31 or #32 or #33 or #34                                                                                                                                                                       | 7,531  |
| #36 | MeSH descriptor: [Osteotomy] explode all trees                                                                                                                                                 | 784    |
| #37 | osteotom*:ti,ab,kw                                                                                                                                                                             | 2,125  |
| #38 | #36 or #37                                                                                                                                                                                     | 2,226  |
| #39 | MeSH descriptor: [Arthrodesis] explode all trees                                                                                                                                               | 1,062  |
| #40 | Arthrodes*:ti,ab,kw                                                                                                                                                                            | 506    |
| #41 | #39 or #40                                                                                                                                                                                     | 1,417  |
| #42 | #35 or #38 or #41                                                                                                                                                                              | 9,896  |
| #43 | #30 and #42 with Publication Year from 2021 to 2021, in Trials                                                                                                                                 | 0      |

1

## 2 S2.3.2d. CINAHL database (year of 2021 to August 7<sup>th</sup>, 2021)

| #   | Query                                           | Results |
|-----|-------------------------------------------------|---------|
| S29 | S15 and S28 (Published Date: 20210401-20210831) | 1       |
| S28 | S20 or S24 or S27                               | 36,525  |
| S27 | S25 or S26                                      | 4,775   |
| S26 | TI (Arthrodes*) OR AB (Arthrodes*)              | 4,019   |
| S25 | (MH "Arthrodesis")                              | 2,940   |
| S24 | S21 or S22 or S23                               | 9,317   |
| S23 | TX (osteotom\$)                                 | 11      |
| S22 | TX (gonarthrosis\$)                             | 419     |
| S21 | (MH "Osteotomy")                                | 8,949   |
| S20 | S16 or S17 or S18 or S19                        | 24,982  |
| S19 | TI (Spondylodes*) OR AB (Spondylodes*)          | 81      |
| S18 | TI (interbody) OR AB (interbody)                | 2,338   |

|     |                                                                                                                                                                                                                          |        |
|-----|--------------------------------------------------------------------------------------------------------------------------------------------------------------------------------------------------------------------------|--------|
| S17 | (MH "Spinal Fusion")                                                                                                                                                                                                     | 10,554 |
| S16 | TI (fusion) OR AB (fusion)                                                                                                                                                                                               | 21,461 |
| S15 | S1 or S2 or S3 or S4 or S5 or S6 or S7 or S8 or S9 or S10 or S11 or S12 or S13 or S14                                                                                                                                    | 32,207 |
| S14 | TI (vape\$ or vaporizer* or vaporiser* or vapourizer* or vapouriser* or vaping*) OR AB (vape\$ or vaporizer* or vaporiser* or vapourizer* or vapouriser* or vaping*)                                                     | 1,718  |
| S13 | TI (e-cig* or ecig* ) OR AB ( e-cig* or ecig* )                                                                                                                                                                          | 3,922  |
| S12 | TI (electron* W3 (cig* or nicotine*)) OR AB (electron* W3 (cig* or nicotine*))                                                                                                                                           | 2,625  |
| S11 | TI Electronic-Cigarette* OR AB Electronic-Cigarette*                                                                                                                                                                     | 2,243  |
| S10 | TI (Ecigarette* OR e-cigarette* ) OR AB ( Ecigarette* OR e-cigarette*)                                                                                                                                                   | 3,779  |
| S9  | (MM "Electronic Cigarettes")                                                                                                                                                                                             | 1,992  |
| S8  | (MM "Vaping")                                                                                                                                                                                                            | 228    |
| S7  | TI (nicotine and (gum* or lozenge* or spray* or patch*)) OR AB (nicotine and (gum* or lozenge* or spray* or patch*))                                                                                                     | 1,160  |
| S6  | TI nicotine replacement OR AB nicotine replacement                                                                                                                                                                       | 1,872  |
| S5  | TI NRT OR AB NRT                                                                                                                                                                                                         | 970    |
| S4  | (MH "Nicotine Chewing Gum") OR (MH "Nicotine Patch")                                                                                                                                                                     | 456    |
| S3  | (MH "Nicotine Replacement Therapy") OR (MH "Tobacco Use Cessation Products+") OR (MH "Nicotinic Agonists+")                                                                                                              | 11,179 |
| S2  | TI ((quit* or stop* or ceas* or giv* or abstain* or abstinen* or Cessat* or reduc*) W3 (smok* or tobacco)) OR AB ((quit* or stop* or ceas* or giv* or abstain* or abstinen* or Cessat* or reduc*) W3 (smok* or tobacco)) | 13,671 |
| S1  | (MM "Smoking Cessation")                                                                                                                                                                                                 | 14,364 |

1

## 2 S2.3.2e. AMED database (year of 2021 to August 9<sup>th</sup>, 2021)

| #  | Searches                                                                                                                                         | Results |
|----|--------------------------------------------------------------------------------------------------------------------------------------------------|---------|
| 1  | Smoking Cessation.mp. [mp=abstract, heading words, title]                                                                                        | 344     |
| 2  | Smoking Reduction.mp. [mp=abstract, heading words, title]                                                                                        | 3       |
| 3  | ((quit* or stop* or ceas* or giv* or abstain* or abstinen* or Cessat* or reduc*) and (smok* or tobacco)).mp. [mp=abstract, heading words, title] | 652     |
| 4  | "Tobacco Use Cessation"/                                                                                                                         | 0       |
| 5  | "Tobacco Use Cessation Products"/                                                                                                                | 0       |
| 6  | Nicotinic Agonists/                                                                                                                              | 0       |
| 7  | Smoking Cessation Agents/                                                                                                                        | 0       |
| 8  | Nicotine Chewing Gum/                                                                                                                            | 0       |
| 9  | NRT.ti,ab.                                                                                                                                       | 8       |
| 10 | nicotine replacement.tw.                                                                                                                         | 18      |
| 11 | ((nicotine or tobacco) adj2 (gum* or lozenge* or patch* or spray*)).tw.                                                                          | 11      |
| 12 | (pharmaco* adj2 (nicotine or tobacco or smoking)).tw.                                                                                            | 10      |
| 13 | (ecigarette* or e cigarette*).ab,ti.                                                                                                             | 7       |
| 14 | electronic cigarette*.ab,ti.                                                                                                                     | 2       |
| 15 | (electron* adj3 (cig* or nicotine*)).ab,ti.                                                                                                      | 5       |
| 16 | (e cig* or ecig*).ab,ti.                                                                                                                         | 7       |
| 17 | (vape* or vaporizer* or vaporiser* or vapourizer* or vapouriser* or vaping*).ab,ti.                                                              | 6       |
| 18 | 1 or 2 or 3 or 4 or 5 or 6 or 7 or 8 or 9 or 10 or 11 or 12 or 13 or 14 or 15 or 16 or 17                                                        | 667     |
| 19 | fusion.ab,ti.                                                                                                                                    | 1,143   |
| 20 | exp Spinal Fusion/                                                                                                                               | 204     |
| 21 | interbody.ab,ti.                                                                                                                                 | 82      |

|    |                               |       |
|----|-------------------------------|-------|
| 22 | Spondylodes*.ab,ti.           | 12    |
| 23 | 19 or 20 or 21 or 22          | 1,195 |
| 24 | exp Osteotomy/                | 1,032 |
| 25 | Osteotomy,Le Fort/            | 0     |
| 26 | gonarthrosis\$.tw.            | 41    |
| 27 | osteotom\$.tw.                | 1,471 |
| 28 | 24 or 25 or 26 or 27          | 1,509 |
| 29 | exp Arthrodesis/              | 1,254 |
| 30 | Arthrodes*.ab,ti.             | 1,330 |
| 31 | 29 or 30                      | 1,661 |
| 32 | 23 or 28 or 31                | 3,485 |
| 33 | 18 and 32                     | 11    |
| 34 | limit 33 to yr="2021-Current" | 0     |

1

2 **S2.4. Search strategies for the impacts of preoperative smoking cessation time, NRT, and vaping o**  
3 **n wound healing and wound complications after surgery**

4 **S2.4.1. The first search strategy**

5 **S2.4.1a. MEDLINE database (inception of database to April 23<sup>rd</sup>, 2021)**

| #  | Searches                                                                                                                   | Results |
|----|----------------------------------------------------------------------------------------------------------------------------|---------|
| 1  | exp Smoking Cessation/                                                                                                     | 29,685  |
| 2  | exp Smoking Reduction/                                                                                                     | 82      |
| 3  | ((quit\$ or stop\$ or ceas\$ or giv\$ or abstain\$ or abstinem\$ or Cessat\$ or reduc\$) adj3 (smok\$ or toba cco)).ti,ab. | 47,550  |
| 4  | "Tobacco Use Cessation"/                                                                                                   | 1,241   |
| 5  | "Tobacco Use Cessation Products"/                                                                                          | 1,970   |
| 6  | Nicotinic Agonists/                                                                                                        | 7,440   |
| 7  | Smoking Cessation Agents/                                                                                                  | 211     |
| 8  | Nicotine Chewing Gum/                                                                                                      | 26      |
| 9  | NRT.ti,ab.                                                                                                                 | 2,182   |
| 10 | nicotine replacement.tw,kf.                                                                                                | 3,608   |
| 11 | ((nicotine or tobacco) adj2 (gum* or lozenge* or patch* or spray*)).tw,kf.                                                 | 2,483   |
| 12 | (pharmac* adj2 (nicotine or tobacco or smoking)).tw,kf.                                                                    | 1,138   |
| 13 | exp Vaping/                                                                                                                | 1,670   |
| 14 | exp Electronic Nicotine Delivery Systems/                                                                                  | 4,363   |
| 15 | (Ecigarette\$ or e-cigarette\$).ab,ti.                                                                                     | 5,142   |
| 16 | Electronic-Cigarette\$.ab,ti.                                                                                              | 3,322   |
| 17 | (electron* adj3 (cig\$ or nicotine\$)).ab,ti.                                                                              | 3,935   |
| 18 | (e-cig\$ or ecig\$).ti,ab.                                                                                                 | 5,407   |
| 19 | (vape\$ or vaporizer\$ or vaporiser\$ or vapourizer\$ or vapouriser\$ or vaping\$).ti,ab.                                  | 3,378   |
| 20 | 1 or 2 or 3 or 4 or 5 or 6 or 7 or 8 or 9 or 10 or 11 or 12 or 13 or 14 or 15 or 16 or 17 or 18 or 19                      | 70,208  |
| 21 | exp Surgical Wound Infection/                                                                                              | 37,363  |
| 22 | exp Surgical Wound Dehiscence/                                                                                             | 7,530   |
| 23 | (surg* adj5 infect*).tw.                                                                                                   | 36,669  |

|    |                                                                |         |
|----|----------------------------------------------------------------|---------|
| 24 | (surg* adj5 wound*).tw.                                        | 16,551  |
| 25 | (surg* adj5 site*).tw.                                         | 27,165  |
| 26 | (surg* adj5 incision*).tw.                                     | 11,976  |
| 27 | (surg* adj5 dehisc*).tw.                                       | 1,288   |
| 28 | (wound* adj5 dehisc*).tw.                                      | 5,569   |
| 29 | (wound* adj5 infect*).tw.                                      | 36,530  |
| 30 | (wound adj5 disrupt*).tw.                                      | 657     |
| 31 | wound complication*.tw.                                        | 6,174   |
| 32 | 21 or 22 or 23 or 24 or 25 or 26 or 27 or 28 or 29 or 30 or 31 | 131,927 |
| 33 | 20 and 32                                                      | 227     |

1

2 **S2.4.1b. EMBASE database (inception of database to April 24<sup>th</sup>, 2021)**

| No. | Query                                                                                                                    | Results |
|-----|--------------------------------------------------------------------------------------------------------------------------|---------|
| #33 | #20 AND #32                                                                                                              | 459     |
| #32 | #21 OR #22 OR #23 OR #24 OR #25 OR #26 OR #27 OR #28 OR #29 OR #30 OR #31                                                | 189,023 |
| #31 | 'wound complication*':ab,ti                                                                                              | 8,673   |
| #30 | (wound NEAR/5 disrupt*):ab,ti                                                                                            | 994     |
| #29 | (wound* NEAR/5 infect*):ab,ti                                                                                            | 50,584  |
| #28 | (wound* NEAR/5 dehisc*):ab,ti                                                                                            | 7,798   |
| #27 | (surg* NEAR/5 dehisc*):ab,ti                                                                                             | 1,859   |
| #26 | (surg* NEAR/5 incision*):ab,ti                                                                                           | 17,515  |
| #25 | (surg* NEAR/5 site*):ab,ti                                                                                               | 39,941  |
| #24 | (surg* NEAR/5 wound*):ab,ti                                                                                              | 22,004  |
| #23 | (surg* NEAR/5 infect*):ab,ti                                                                                             | 52,141  |
| #22 | 'wound dehiscence'/exp                                                                                                   | 19,795  |
| #21 | 'surgical infection'/exp                                                                                                 | 53,361  |
| #20 | #1 OR #2 OR #3 OR #4 OR #5 OR #6 OR #7 OR #8 OR #9 OR #10 OR #11 OR #12 OR #13 OR #14 OR #15 OR #16 OR #17 OR #18 OR #19 | 116,591 |
| #19 | vape*:ab,ti OR vaporizer*:ab,ti OR vaporiser*:ab,ti OR vapourizer*:ab,ti OR vapouriser*:ab,ti OR vapi<br>g*:ab,ti        | 4,229   |
| #18 | 'e cig*':ab,ti OR ecig*':ab,ti                                                                                           | 6,596   |
| #17 | (electron* NEAR/3 (cig* OR nicotine*)):ab,ti                                                                             | 4,720   |
| #16 | 'electronic cigarette*':ab,ti                                                                                            | 4,023   |
| #15 | ecigarette*:ab,ti OR 'e cigarette*':ab,ti                                                                                | 6,234   |
| #14 | 'electronic cigarette'/exp                                                                                               | 7,737   |
| #13 | 'vaping'/exp                                                                                                             | 2,989   |
| #12 | (pharmaco* NEAR/2 (nicotine OR tobacco OR smoking)):ab,ti                                                                | 1,381   |
| #11 | ((nicotine OR tobacco) NEAR/2 (gum* OR lozenge* OR patch* OR spray*)):ab,ti                                              | 2,997   |
| #10 | 'nicotine replacement':ab,ti                                                                                             | 4,564   |
| #9  | nrt:ab,ti                                                                                                                | 2,890   |
| #8  | 'nicotine chewing gum'/exp                                                                                               | 2,956   |
| #7  | 'smoking cessation agents'/exp                                                                                           | 36      |
| #6  | 'nicotinic agonists'/exp                                                                                                 | 25,417  |
| #5  | 'tobacco use cessation products'/exp                                                                                     | 2,956   |

|    |                                                                                                                 |        |
|----|-----------------------------------------------------------------------------------------------------------------|--------|
| #4 | 'tobacco use cessation'/exp                                                                                     | 61,602 |
| #3 | ((quit* OR stop* OR ceas* OR giv* OR abstain* OR abstin* OR cessat* OR reduc*) NEAR/3 (smok* OR tobacco)):ab,ti | 62,187 |
| #2 | 'smoking reduction'/exp                                                                                         | 278    |
| #1 | 'smoking cessation'/exp                                                                                         | 61,602 |

1

## 2 S2.4.1c. Cochrane library database (inception of database to April 24<sup>th</sup>, 2021)

| ID  | Search                                                                                                                                                                                         | Hits   |
|-----|------------------------------------------------------------------------------------------------------------------------------------------------------------------------------------------------|--------|
| #1  | MeSH descriptor: [Smoking Cessation] explode all trees                                                                                                                                         | 4,145  |
| #2  | MeSH descriptor: [Smoking Reduction] explode all trees                                                                                                                                         | 25     |
| #3  | ((quit* or stop* or ceas* or giv* or abstain* or abstin* or Cessat* or reduc*) NEAR/3 (smoke* or tobacco)):ti,ab,kw                                                                            | 5,174  |
| #4  | MeSH descriptor: [Tobacco Use Cessation Devices] explode all trees                                                                                                                             | 550    |
| #5  | MeSH descriptor: [Nicotine Chewing Gum] explode all trees                                                                                                                                      | 14     |
| #6  | MeSH descriptor: [Nicotinic Agonists] explode all trees                                                                                                                                        | 741    |
| #7  | (Tobacco Use Cessation Products):ti,ab,kw                                                                                                                                                      | 287    |
| #8  | (Nicotine near/2 patch*):ti,ab,kw                                                                                                                                                              | 1,299  |
| #9  | (Nicotine near/2 delivery device*):ti,ab,kw                                                                                                                                                    | 103    |
| #10 | (nicotine near/2 nasal spray*):ti,ab,kw                                                                                                                                                        | 97     |
| #11 | (smoking near/2 cessation product*):ti,ab,kw                                                                                                                                                   | 639    |
| #12 | (nicotine near/2 replacement):ti,ab,kw                                                                                                                                                         | 1,837  |
| #13 | (nicotine near/2 lozenge*):ti,ab,kw                                                                                                                                                            | 177    |
| #14 | (nicotine polacrilex):ti,ab,kw                                                                                                                                                                 | 50     |
| #15 | (nicotine near/2 inhal*):ti,ab,kw                                                                                                                                                              | 150    |
| #16 | (nicotine near/2 chewing gum*):ti,ab,kw                                                                                                                                                        | 140    |
| #17 | nicorette:ti,ab,kw                                                                                                                                                                             | 97     |
| #18 | (nicotinic near/2 agonist*):ti,ab,kw                                                                                                                                                           | 831    |
| #19 | (nicotine near/2 tablet*):ti,ab,kw                                                                                                                                                             | 41     |
| #20 | (nicotine near/2 sublingual):ti,ab,kw                                                                                                                                                          | 25     |
| #21 | NRT:ti,ab,kw                                                                                                                                                                                   | 926    |
| #22 | (nicotine near/3 therap*):ti,ab,kw                                                                                                                                                             | 2,045  |
| #23 | MeSH descriptor: [Vaping] explode all trees                                                                                                                                                    | 52     |
| #24 | MeSH descriptor: [Electronic Nicotine Delivery Systems] explode all trees                                                                                                                      | 148    |
| #25 | (Ecigarette* or e-cigarette*):ti,ab,kw                                                                                                                                                         | 542    |
| #26 | (Electronic-Cigarette*):ti,ab,kw                                                                                                                                                               | 441    |
| #27 | ((electron* NEAR/3 (cig* OR nicotine*))) :ti,ab,kw                                                                                                                                             | 543    |
| #28 | (e-cig* or ecig*):ti,ab,kw                                                                                                                                                                     | 587    |
| #29 | (vape* or vaporizer* or vaporiser* or vapourizer* or vapouriser* or vaping*):ti,ab,kw                                                                                                          | 2,341  |
| #30 | #1 or #2 or #3 or #4 or #5 or #6 or #7 or #8 or #9 or #10 or #11 or #12 or #13 or #14 or #15 or #16 or #17 or #18 or #19 or #20 or #21 or #22 or #23 or #24 or #25 or #26 or #27 or #28 or #29 | 11,862 |
| #31 | MeSH descriptor: [Surgical Wound Infection] explode all trees                                                                                                                                  | 3,454  |
| #32 | MeSH descriptor: [Surgical Wound Dehiscence] explode all trees                                                                                                                                 | 470    |
| #33 | (surg* near/5 infect*):ti and (surg* near/5 infect*):ab (Word variations have been searched)                                                                                                   | 961    |
| #34 | (surg* near/5 wound*):ti and (surg* near/5 wound*):ab (Word variations have been searched)                                                                                                     | 445    |
| #35 | (surg* near/5 site*):ti and (surg* near/5 site*):ab (Word variations have been searched)                                                                                                       | 784    |

|     |                                                                                                  |       |
|-----|--------------------------------------------------------------------------------------------------|-------|
| #36 | (surg* near/5 incision*):ti and (surg* near/5 incision*):ab (Word variations have been searched) | 347   |
| #37 | (surg* near/5 dehisc*):ti and (surg* near/5 dehisc*):ab (Word variations have been searched)     | 8     |
| #38 | (wound* near/5 dehisc*):ti and (wound* near/5 dehisc*):ab (Word variations have been searched)   | 32    |
| #39 | (wound* near/5 infect*):ti and (wound* near/5 infect*):ab (Word variations have been searched)   | 460   |
| #40 | (wound near/5 disrupt*):ti and (wound near/5 disrupt*):ab (Word variations have been searched)   | 9     |
| #41 | wound complication* :ti and wound complication* :ab (Word variations have been searched)         | 567   |
| #42 | #31 or #32 or #33 or #34 or #35 or #36 or #37 or #38 or #39 or #40 or #41                        | 5,559 |
| #43 | #30 and #42 in Trials                                                                            | 7     |

1

#### 2 S2.4.1d. CINAHL database (inception of database to April 24<sup>th</sup>, 2021)

| #   | Query                                                                                                                                                                                                                    | Results |
|-----|--------------------------------------------------------------------------------------------------------------------------------------------------------------------------------------------------------------------------|---------|
| S28 | S15 and S27                                                                                                                                                                                                              | 140     |
| S27 | S16 OR S17 OR S18 OR S19 OR S20 OR S21 OR S22 OR S23 OR S24 OR S25 OR S26                                                                                                                                                | 88,226  |
| S26 | TX wound complication*                                                                                                                                                                                                   | 3,240   |
| S25 | TX (wound n5 disrupt*)                                                                                                                                                                                                   | 875     |
| S24 | TX (wound* n5 infect*)                                                                                                                                                                                                   | 34,820  |
| S23 | TX (wound* n5 dehisc*)                                                                                                                                                                                                   | 4,292   |
| S22 | TX (surg* n5 dehisc*)                                                                                                                                                                                                    | 2,573   |
| S21 | TX (surg* n5 incision*)                                                                                                                                                                                                  | 9,626   |
| S20 | TX (surg* n5 site*)                                                                                                                                                                                                      | 24,201  |
| S19 | TX (surg* n5 wound*)                                                                                                                                                                                                     | 32,261  |
| S18 | TX (surg* n5 infect*)                                                                                                                                                                                                    | 37,386  |
| S17 | (MH "Surgical Wound Dehiscence")                                                                                                                                                                                         | 1,575   |
| S16 | (MH "Surgical Wound Infection")                                                                                                                                                                                          | 11,253  |
| S15 | S1 or S2 or S3 or S4 or S5 or S6 or S7 or S8 or S9 or S10 or S11 or S12 or S13 or S14                                                                                                                                    | 31,640  |
| S14 | TI (vape\$ or vaporizer* or vaporiser* or vapourizer* or vapouriser* or vaping*) OR AB (vape\$ or vaporizer* or vaporiser* or vapourizer* or vapouriser* or vaping*)                                                     | 1,625   |
| S13 | TI (e-cig* or ecig* ) OR AB ( e-cig* or ecig* )                                                                                                                                                                          | 3,758   |
| S12 | TI (electron* W3 (cig* or nicotine*)) OR AB (electron* W3 (cig* or nicotine*))                                                                                                                                           | 2,539   |
| S11 | TI Electronic-Cigarette* OR AB Electronic-Cigarette*                                                                                                                                                                     | 2,180   |
| S10 | TI (Ecigarette* OR e-cigarette* ) OR AB ( Ecigarette* OR e-cigarette*)                                                                                                                                                   | 3,616   |
| S9  | (MM "Electronic Cigarettes")                                                                                                                                                                                             | 1,919   |
| S8  | (MM "Vaping")                                                                                                                                                                                                            | 197     |
| S7  | TI (nicotine and (gum* or lozenge* or spray* or patch*)) OR AB (nicotine and (gum* or lozenge* or spray* or patch*))                                                                                                     | 1,150   |
| S6  | TI nicotine replacement OR AB nicotine replacement                                                                                                                                                                       | 1,836   |
| S5  | TI NRT OR AB NRT                                                                                                                                                                                                         | 947     |
| S4  | (MH "Nicotine Chewing Gum" OR (MH "Nicotine Patch"))                                                                                                                                                                     | 454     |
| S3  | (MH ("Nicotine Replacement Therapy") OR (MH "Tobacco Use Cessation Products+") OR (MH "Nicotinic Agonists+"))                                                                                                            | 10,955  |
| S2  | TI ((quit* or stop* or ceas* or giv* or abstain* or abstinen* or Cessat* or reduc*) W3 (smok* or tobacco)) OR AB ((quit* or stop* or ceas* or giv* or abstain* or abstinen* or Cessat* or reduc*) W3 (smok* or tobacco)) | 13,457  |
| S1  | (MM "Smoking Cessation")                                                                                                                                                                                                 | 14,099  |

3

#### 4 S2.4.1e. AMED database (inception of database to April 27<sup>th</sup>, 2021)

| #  | Searches                                                                                                                                         | Results |
|----|--------------------------------------------------------------------------------------------------------------------------------------------------|---------|
| 1  | Smoking Cessation.mp. [mp=abstract, heading words, title]                                                                                        | 343     |
| 2  | Smoking Reduction.mp. [mp=abstract, heading words, title]                                                                                        | 3       |
| 3  | ((quit* or stop* or ceas* or giv* or abstain* or abstinen* or Cessat* or reduc*) and (smok* or tobacco)).mp. [mp=abstract, heading words, title] | 650     |
| 4  | "Tobacco Use Cessation"/                                                                                                                         | 0       |
| 5  | "Tobacco Use Cessation Products"/                                                                                                                | 0       |
| 6  | Nicotinic Agonists/                                                                                                                              | 0       |
| 7  | Smoking Cessation Agents/                                                                                                                        | 0       |
| 8  | Nicotine Chewing Gum/                                                                                                                            | 0       |
| 9  | NRT.ti,ab.                                                                                                                                       | 8       |
| 10 | nicotine replacement.tw.                                                                                                                         | 18      |
| 11 | ((nicotine or tobacco) adj2 (gum* or lozenge* or patch* or spray*)).tw.                                                                          | 11      |
| 12 | (pharmaco* adj2 (nicotine or tobacco or smoking)).tw.                                                                                            | 10      |
| 13 | (ecigarette* or e cigarette*).ab,ti.                                                                                                             | 7       |
| 14 | electronic cigarette*.ab,ti.                                                                                                                     | 2       |
| 15 | (electron* adj3 (cig* or nicotine*)).ab,ti.                                                                                                      | 5       |
| 16 | (e cig* or ecig*).ab,ti.                                                                                                                         | 7       |
| 17 | (vape* or vaporizer* or vaporiser* or vapourizer* or vapouriser* or vaping*).ab,ti.                                                              | 6       |
| 18 | 1 or 2 or 3 or 4 or 5 or 6 or 7 or 8 or 9 or 10 or 11 or 12 or 13 or 14 or 15 or 16 or 17                                                        | 665     |
| 19 | (surg* adj5 infect*).tw.                                                                                                                         | 223     |
| 20 | (surg* adj5 wound*).tw.                                                                                                                          | 192     |
| 21 | (surg* adj5 site*).tw.                                                                                                                           | 120     |
| 22 | (surg* adj5 incision*).tw.                                                                                                                       | 82      |
| 23 | (surg* adj5 dehisc*).tw.                                                                                                                         | 16      |
| 24 | (wound* adj5 dehisc*).tw.                                                                                                                        | 71      |
| 25 | (wound* adj5 infect*).tw.                                                                                                                        | 440     |
| 26 | (wound adj5 disrupt*).tw.                                                                                                                        | 1       |
| 27 | wound complication*.tw.                                                                                                                          | 147     |
| 28 | 19 or 20 or 21 or 22 or 23 or 24 or 25 or 26 or 27                                                                                               | 941     |
| 29 | 18 and 28                                                                                                                                        | 18      |

1

2 **S2.4.2. The second search strategy (the first updated search)**

3 **S2.4.2a. MEDLINE database (year of 2021 to August 6<sup>th</sup>, 2021)**

| # | Searches                                                                                                                  | Results |
|---|---------------------------------------------------------------------------------------------------------------------------|---------|
| 1 | exp Smoking Cessation/                                                                                                    | 30,268  |
| 2 | exp Smoking Reduction/                                                                                                    | 90      |
| 3 | ((quit\$ or stop\$ or ceas\$ or giv\$ or abstain\$ or abstinen\$ or Cessat\$ or reduc\$) adj3 (smok\$ or tobacco)).ti,ab. | 48,336  |
| 4 | "Tobacco Use Cessation"/                                                                                                  | 1,285   |
| 5 | "Tobacco Use Cessation Products"/                                                                                         | 2,065   |
| 6 | Nicotinic Agonists/                                                                                                       | 7,515   |
| 7 | Smoking Cessation Agents/                                                                                                 | 227     |
| 8 | Nicotine Chewing Gum/                                                                                                     | 27      |
| 9 | NRT.ti,ab.                                                                                                                | 2,237   |

|    |                                                                                                       |         |
|----|-------------------------------------------------------------------------------------------------------|---------|
| 10 | nicotine replacement.tw,kf.                                                                           | 3,688   |
| 11 | ((nicotine or tobacco) adj2 (gum* or lozenge* or patch* or spray*).tw,kf.                             | 2,503   |
| 12 | (pharmaco* adj2 (nicotine or tobacco or smoking)).tw,kf.                                              | 1,154   |
| 13 | exp Vaping/                                                                                           | 2,109   |
| 14 | exp Electronic Nicotine Delivery Systems/                                                             | 5,020   |
| 15 | (Ecigarette\$ or e-cigarette\$.ab,ti.                                                                 | 5,442   |
| 16 | Electronic-Cigarette\$.ab,ti.                                                                         | 3,476   |
| 17 | (electron* adj3 (cig\$ or nicotine\$)).ab,ti.                                                         | 4,139   |
| 18 | (e-cig\$ or ecig\$).ti,ab.                                                                            | 5,722   |
| 19 | (vape\$ or vaporizer\$ or vaporiser\$ or vapourizer\$ or vapouriser\$ or vaping\$).ti,ab.             | 3,598   |
| 20 | 1 or 2 or 3 or 4 or 5 or 6 or 7 or 8 or 9 or 10 or 11 or 12 or 13 or 14 or 15 or 16 or 17 or 18 or 19 | 71,553  |
| 21 | exp Surgical Wound Infection/                                                                         | 37,954  |
| 22 | exp Surgical Wound Dehiscence/                                                                        | 7,583   |
| 23 | (surg* adj5 infect*).tw.                                                                              | 37,514  |
| 24 | (surg* adj5 wound*).tw.                                                                               | 16,856  |
| 25 | (surg* adj5 site*).tw.                                                                                | 27,890  |
| 26 | (surg* adj5 incision*).tw.                                                                            | 12,237  |
| 27 | (surg* adj5 dehisc*).tw.                                                                              | 1,326   |
| 28 | (wound* adj5 dehisc*).tw.                                                                             | 5,681   |
| 29 | (wound* adj5 infect*).tw.                                                                             | 37,212  |
| 30 | (wound adj5 disrupt*).tw.                                                                             | 672     |
| 31 | wound complication*.tw.                                                                               | 6,327   |
| 32 | 21 or 22 or 23 or 24 or 25 or 26 or 27 or 28 or 29 or 30 or 31                                        | 134,341 |
| 33 | 20 and 32                                                                                             | 227     |
| 34 | limit 33 to yr="2021 -Current"                                                                        | 7       |

1

2

#### S2.4.2b. EMBASE database (year of 2021 to August 7<sup>th</sup>, 2021)

| No. | Query                                                                     | Results |
|-----|---------------------------------------------------------------------------|---------|
| #34 | #20 AND #32 AND [2021-2021]/py                                            | 20      |
| #33 | #20 AND #32                                                               | 465     |
| #32 | #21 OR #22 OR #23 OR #24 OR #25 OR #26 OR #27 OR #28 OR #29 OR #30 OR #31 | 193,258 |
| #31 | 'wound complication*':ab,ti                                               | 8,870   |
| #30 | (wound NEAR/5 disrupt*):ab,ti                                             | 1,026   |
| #29 | (wound* NEAR/5 infect*):ab,ti                                             | 51,713  |
| #28 | (wound* NEAR/5 dehisc*):ab,ti                                             | 8,024   |
| #27 | (surg* NEAR/5 dehisc*):ab,ti                                              | 1,957   |
| #26 | (surg* NEAR/5 incision*):ab,ti                                            | 17,867  |
| #25 | (surg* NEAR/5 site*):ab,ti                                                | 40,953  |
| #24 | (surg* NEAR/5 wound*):ab,ti                                               | 22,594  |
| #23 | (surg* NEAR/5 infect*):ab,ti                                              | 53,362  |
| #22 | 'wound dehiscence'/exp                                                    | 20,289  |
| #21 | 'surgical infection'/exp                                                  | 54,736  |



|     |                                                                                                                          |         |
|-----|--------------------------------------------------------------------------------------------------------------------------|---------|
| #20 | #1 OR #2 OR #3 OR #4 OR #5 OR #6 OR #7 OR #8 OR #9 OR #10 OR #11 OR #12 OR #13 OR #14 OR #15 OR #16 OR #17 OR #18 OR #19 | 118,655 |
| #19 | vape*:ab,ti OR vaporizer*:ab,ti OR vaporiser*:ab,ti OR vapourizer*:ab,ti OR vapouriser*:ab,ti OR vapi<br>g*:ab,ti        | 4,525   |
| #18 | 'e cig*:ab,ti OR ecig*:ab,ti                                                                                             | 6,969   |
| #17 | (electron* NEAR/3 (cig* OR nicotine*)):ab,ti                                                                             | 4,943   |
| #16 | 'electronic cigarette*:ab,ti                                                                                             | 4,199   |
| #15 | ecigarette*:ab,ti OR 'e cigarette*:ab,ti                                                                                 | 6,590   |
| #14 | 'electronic cigarette'/exp                                                                                               | 8,116   |
| #13 | 'vaping'/exp                                                                                                             | 3,322   |
| #12 | (pharmaco* NEAR/2 (nicotine OR tobacco OR smoking)):ab,ti                                                                | 1,391   |
| #11 | ((nicotine OR tobacco) NEAR/2 (gum* OR lozenge* OR patch* OR spray*)):ab,ti                                              | 3,027   |
| #10 | 'nicotine replacement':ab,ti                                                                                             | 4,629   |
| #9  | nrt:ab,ti                                                                                                                | 2,940   |
| #8  | 'nicotine chewing gum'/exp                                                                                               | 2,966   |
| #7  | 'smoking cessation agents'/exp                                                                                           | 40      |
| #6  | 'nicotinic agonists'/exp                                                                                                 | 25,924  |
| #5  | 'tobacco use cessation products'/exp                                                                                     | 2,966   |
| #4  | 'tobacco use cessation'/exp                                                                                              | 62,328  |
| #3  | ((quit* OR stop* OR ceas* OR giv* OR abstain* OR abstin* OR cessat* OR reduc*) NEAR/3 (sm<br>ok* OR tobacco)):ab,ti      | 63,027  |
| #2  | 'smoking reduction'/exp                                                                                                  | 297     |
| #1  | 'smoking cessation'/exp                                                                                                  | 62,328  |

1

## 2 S2.4.2c. Cochrane library database (year of 2021 to August 7<sup>th</sup>, 2021)

| ID  | Search                                                                                                                 | Hits  |
|-----|------------------------------------------------------------------------------------------------------------------------|-------|
| #1  | MeSH descriptor: [Smoking Cessation] explode all trees                                                                 | 4,217 |
| #2  | MeSH descriptor: [Smoking Reduction] explode all trees                                                                 | 27    |
| #3  | ((quit* or stop* or ceas* or giv* or abstain* or abstin* or Cessat* or reduc*) NEAR/3 (smoke* or<br>tobacco)):ti,ab,kw | 5,304 |
| #4  | MeSH descriptor: [Tobacco Use Cessation Devices] explode all trees                                                     | 571   |
| #5  | MeSH descriptor: [Nicotine Chewing Gum] explode all trees                                                              | 16    |
| #6  | MeSH descriptor: [Nicotinic Agonists] explode all trees                                                                | 748   |
| #7  | (Tobacco Use Cessation Products):ti,ab,kw                                                                              | 296   |
| #8  | (Nicotine near/2 patch*):ti,ab,kw                                                                                      | 1,316 |
| #9  | (Nicotine near/2 delivery device*):ti,ab,kw                                                                            | 106   |
| #10 | (nicotine near/2 nasal spray*):ti,ab,kw                                                                                | 97    |
| #11 | (smoking near/2 cessation product*):ti,ab,kw                                                                           | 659   |
| #12 | (nicotine near/2 replacement):ti,ab,kw                                                                                 | 1,871 |
| #13 | (nicotine near/2 lozenge*):ti,ab,kw                                                                                    | 181   |
| #14 | (nicotine polacrilex):ti,ab,kw                                                                                         | 50    |
| #15 | (nicotine near/2 inhal*):ti,ab,kw                                                                                      | 151   |
| #16 | (nicotine near/2 chewing gum*):ti,ab,kw                                                                                | 142   |
| #17 | nicorette:ti,ab,kw                                                                                                     | 97    |
| #18 | (nicotinic near/2 agonist*):ti,ab,kw                                                                                   | 840   |
| #19 | (nicotine near/2 tablet*):ti,ab,kw                                                                                     | 41    |

|     |                                                                                                                                                                                                |        |
|-----|------------------------------------------------------------------------------------------------------------------------------------------------------------------------------------------------|--------|
| #20 | (nicotine near/2 sublingual):ti,ab,kw                                                                                                                                                          | 25     |
| #21 | NRT:ti,ab,kw                                                                                                                                                                                   | 954    |
| #22 | (nicotine near/3 therap*):ti,ab,kw                                                                                                                                                             | 2,079  |
| #23 | MeSH descriptor: [Vaping] explode all trees                                                                                                                                                    | 60     |
| #24 | MeSH descriptor: [Electronic Nicotine Delivery Systems] explode all trees                                                                                                                      | 162    |
| #25 | (Ecigarette* or e-cigarette*):ti,ab,kw                                                                                                                                                         | 584    |
| #26 | (Electronic-Cigarette*):ti,ab,kw                                                                                                                                                               | 463    |
| #27 | ((electron* NEAR/3 (cig* OR nicotine*))) :ti,ab,kw                                                                                                                                             | 571    |
| #28 | (e-cig* or ecig*):ti,ab,kw                                                                                                                                                                     | 628    |
| #29 | (vape* or vaporizer* or vaporiser* or vapourizer* or vapouriser* or vaping*):ti,ab,kw                                                                                                          | 2,394  |
| #30 | #1 or #2 or #3 or #4 or #5 or #6 or #7 or #8 or #9 or #10 or #11 or #12 or #13 or #14 or #15 or #16 or #17 or #18 or #19 or #20 or #21 or #22 or #23 or #24 or #25 or #26 or #27 or #28 or #29 | 12,110 |
| #31 | MeSH descriptor: [Surgical Wound Infection] explode all trees                                                                                                                                  | 3,505  |
| #32 | MeSH descriptor: [Surgical Wound Dehiscence] explode all trees                                                                                                                                 | 472    |
| #33 | (surg* near/5 infect*):ti and (surg* near/5 infect*):ab (Word variations have been searched)                                                                                                   | 989    |
| #34 | (surg* near/5 wound*):ti and (surg* near/5 wound*):ab (Word variations have been searched)                                                                                                     | 458    |
| #35 | (surg* near/5 site*):ti and (surg* near/5 site*):ab (Word variations have been searched)                                                                                                       | 814    |
| #36 | (surg* near/5 incision*):ti and (surg* near/5 incision*):ab (Word variations have been searched)                                                                                               | 359    |
| #37 | (surg* near/5 dehis*):ti and (surg* near/5 dehis*):ab (Word variations have been searched)                                                                                                     | 8      |
| #38 | (wound* near/5 dehis*):ti and (wound* near/5 dehis*):ab (Word variations have been searched)                                                                                                   | 32     |
| #39 | (wound* near/5 infect*):ti and (wound* near/5 infect*):ab (Word variations have been searched)                                                                                                 | 473    |
| #40 | (wound near/5 disrupt*):ti and (wound near/5 disrupt*):ab (Word variations have been searched)                                                                                                 | 9      |
| #41 | wound complication*:ti and wound complication*:ab (Word variations have been searched)                                                                                                         | 579    |
| #42 | #31 or #32 or #33 or #34 or #35 or #36 or #37 or #38 or #39 or #40 or #41                                                                                                                      | 5,671  |
| #43 | #30 and #42 with Publication Year from 2021 to 2021, in Trials                                                                                                                                 | 1      |

1

2 **S2.4.2d. CINAHL database (year of 2021 to August 7<sup>th</sup>, 2021)**

| #   | Query                                                                                                                                                                | Results |
|-----|----------------------------------------------------------------------------------------------------------------------------------------------------------------------|---------|
| S28 | S15 and S27 (Published Date: 20210401-20210831)                                                                                                                      | 1       |
| S27 | S16 OR S17 OR S18 OR S19 OR S20 OR S21 OR S22 OR S23 OR S24 OR S25 OR S26                                                                                            | 89,123  |
| S26 | TX wound complication*                                                                                                                                               | 3,353   |
| S25 | TX (wound n5 disrupt*)                                                                                                                                               | 875     |
| S24 | TX (wound* n5 infect*)                                                                                                                                               | 35,124  |
| S23 | TX (wound* n5 dehis*)                                                                                                                                                | 4,352   |
| S22 | TX (surg* n5 dehis*)                                                                                                                                                 | 2,633   |
| S21 | TX (surg* n5 incision*)                                                                                                                                              | 9,689   |
| S20 | TX (surg* n5 site*)                                                                                                                                                  | 24,564  |
| S19 | TX (surg* n5 wound*)                                                                                                                                                 | 32,722  |
| S18 | TX (surg* n5 infect*)                                                                                                                                                | 37,975  |
| S17 | (MH "Surgical Wound Dehiscence")                                                                                                                                     | 1,615   |
| S16 | (MH "Surgical Wound Infection")                                                                                                                                      | 11,535  |
| S15 | S1 or S2 or S3 or S4 or S5 or S6 or S7 or S8 or S9 or S10 or S11 or S12 or S13 or S14                                                                                | 32,207  |
| S14 | TI (vape\$ or vaporizer* or vaporiser* or vapourizer* or vapouriser* or vaping*) OR AB (vape\$ or vaporizer* or vaporiser* or vapourizer* or vapouriser* or vaping*) | 1,718   |
| S13 | TI (e-cig* or ecig* ) OR AB ( e-cig* or ecig* )                                                                                                                      | 3,922   |

|     |                                                                                                                                                                                                                          |        |
|-----|--------------------------------------------------------------------------------------------------------------------------------------------------------------------------------------------------------------------------|--------|
| S12 | TI (electron* W3 (cig* or nicotine*)) OR AB (electron* W3 (cig* or nicotine*))                                                                                                                                           | 2,625  |
| S11 | TI Electronic-Cigarette* OR AB Electronic-Cigarette*                                                                                                                                                                     | 2,243  |
| S10 | TI (Ecigarette* OR e-cigarette* ) OR AB ( Ecigarette* OR e-cigarette*)                                                                                                                                                   | 3,779  |
| S9  | (MM "Electronic Cigarettes")                                                                                                                                                                                             | 1,992  |
| S8  | (MM "Vaping")                                                                                                                                                                                                            | 228    |
| S7  | TI (nicotine and (gum* or lozenge* or spray* or patch*)) OR AB (nicotine and (gum* or lozenge* or spray* or patch*))                                                                                                     | 1,160  |
| S6  | TI nicotine replacement OR AB nicotine replacement                                                                                                                                                                       | 1,872  |
| S5  | TI NRT OR AB NRT                                                                                                                                                                                                         | 970    |
| S4  | (MH "Nicotine Chewing Gum" OR (MH "Nicotine Patch"))                                                                                                                                                                     | 456    |
| S3  | (MH ("Nicotine Replacement Therapy") OR (MH "Tobacco Use Cessation Products+") OR (MH "Nicotinic Agonists+"))                                                                                                            | 11,179 |
| S2  | TI ((quit* or stop* or ceas* or giv* or abstain* or abstinen* or Cessat* or reduc*) W3 (smok* or tobacco)) OR AB ((quit* or stop* or ceas* or giv* or abstain* or abstinen* or Cessat* or reduc*) W3 (smok* or tobacco)) | 13,671 |
| S1  | (MM "Smoking Cessation")                                                                                                                                                                                                 | 14,364 |

1

## 2 S2.4.2e. AMED database (year of 2021 to August 9<sup>th</sup>, 2021)

| #  | Searches                                                                                                                                         | Results |
|----|--------------------------------------------------------------------------------------------------------------------------------------------------|---------|
| 1  | Smoking Cessation.mp. [mp=abstract, heading words, title]                                                                                        | 344     |
| 2  | Smoking Reduction.mp. [mp=abstract, heading words, title]                                                                                        | 3       |
| 3  | ((quit* or stop* or ceas* or giv* or abstain* or abstinen* or Cessat* or reduc*) and (smok* or tobacco)).mp. [mp=abstract, heading words, title] | 652     |
| 4  | "Tobacco Use Cessation"/                                                                                                                         | 0       |
| 5  | "Tobacco Use Cessation Products"/                                                                                                                | 0       |
| 6  | Nicotinic Agonists/                                                                                                                              | 0       |
| 7  | Smoking Cessation Agents/                                                                                                                        | 0       |
| 8  | Nicotine Chewing Gum/                                                                                                                            | 0       |
| 9  | NRT.ti,ab.                                                                                                                                       | 8       |
| 10 | nicotine replacement.tw.                                                                                                                         | 18      |
| 11 | ((nicotine or tobacco) adj2 (gum* or lozenge* or patch* or spray*)).tw.                                                                          | 11      |
| 12 | (pharmaco* adj2 (nicotine or tobacco or smoking)).tw.                                                                                            | 10      |
| 13 | (ecigarette* or e cigarette*).ab,ti.                                                                                                             | 7       |
| 14 | electronic cigarette*.ab,ti.                                                                                                                     | 2       |
| 15 | (electron* adj3 (cig* or nicotine*)).ab,ti.                                                                                                      | 5       |
| 16 | (e cig* or ecig*).ab,ti.                                                                                                                         | 7       |
| 17 | (vape* or vaporizer* or vaporiser* or vapourizer* or vapouriser* or vaping*).ab,ti.                                                              | 6       |
| 18 | 1 or 2 or 3 or 4 or 5 or 6 or 7 or 8 or 9 or 10 or 11 or 12 or 13 or 14 or 15 or 16 or 17                                                        | 667     |
| 19 | (surg* adj5 infect*).tw.                                                                                                                         | 227     |
| 20 | (surg* adj5 wound*).tw.                                                                                                                          | 197     |
| 21 | (surg* adj5 site*).tw.                                                                                                                           | 125     |
| 22 | (surg* adj5 incision*).tw.                                                                                                                       | 85      |
| 23 | (surg* adj5 dehisc*).tw.                                                                                                                         | 16      |
| 24 | (wound* adj5 dehisc*).tw.                                                                                                                        | 72      |
| 25 | (wound* adj5 infect*).tw.                                                                                                                        | 452     |
| 26 | (wound adj5 disrupt*).tw.                                                                                                                        | 1       |

|    |                                                    |     |
|----|----------------------------------------------------|-----|
| 27 | wound complication*.tw.                            | 154 |
| 28 | 19 or 20 or 21 or 22 or 23 or 24 or 25 or 26 or 27 | 969 |
| 29 | 18 and 28                                          | 18  |
| 30 | limit 29 to yr="2021-Current"                      | 0   |

1

1 **Appendix S3. PRISMA flow chart of the impact of preoperative smoking cessation**  
 2 **n time, nicotine replacement therapy (NRT), and vaping**

3 Flow chart of the impact of preoperative smoking cessation time, NRT, and vaping on bone healing is  
 4 shown in **Appendix S3a**. Flow chart of the impacts of preoperative smoking cessation time, NRT, and  
 5 vaping on wound healing and wound complications is shown in **Appendix S3b**.

6 **Appendix S3a. PRISMA flow chart of the impacts of preoperative smoking cessation time, NRT, and vaping**  
 7 **on bone healing**

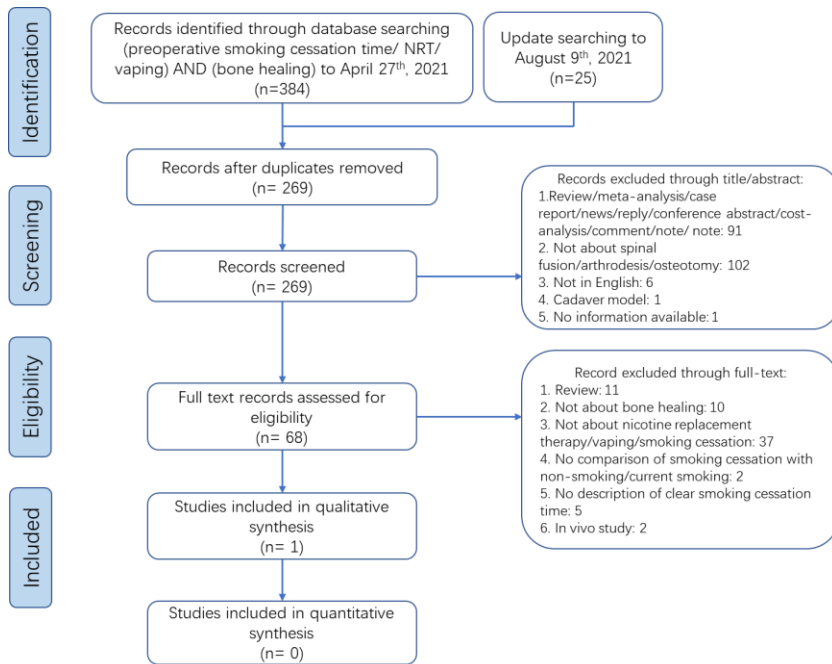

8  
9

10 **Appendix S3b. PRISMA flow chart of the impacts of preoperative smoking cessation time, NRT, and vaping**  
 11 **on wound healing and wound complications after surgery**

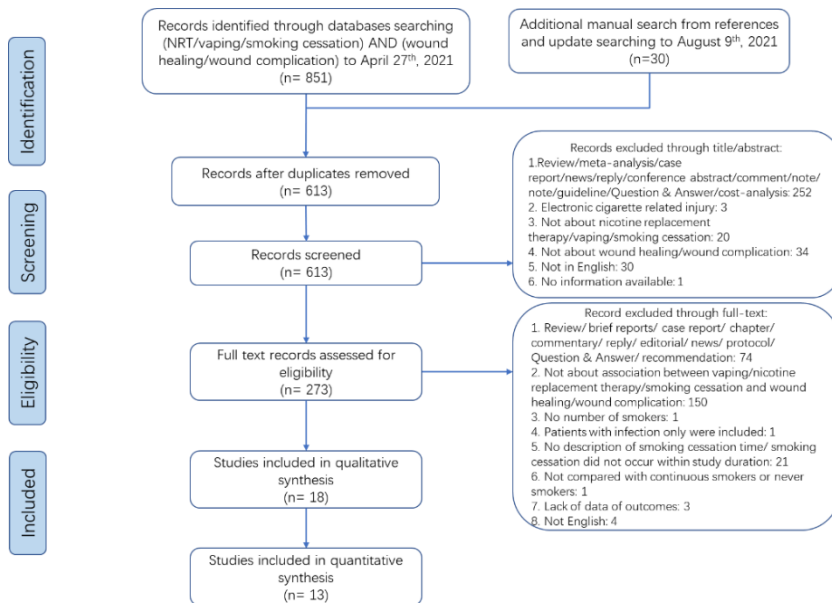

12

## 1 **Appendix S4. Search results**

2 Search results about smoking and alcohol consumption were shown in **Appendix S4a**. Search results about preo  
3 perative smoking cessation time, nicotine replacement therapy (NRT), and vaping were shown in **Appendix S4b**.

### 4 **Appendix S4a. Smoking and alcohol consumption**

5 Through the initial literature searching to the date of October 28th, 2019, we acquired 4,120 studies from  
6 MEDLINE, 10,159 studies from EMBASE, 880 studies from Cochrane CENTRAL, 1,272 studies from CINAHL,  
7 82 studies from AMED, and four studies from an additional manual search from the references. Updated literature  
8 searching was subsequently performed to the date of July 10th, 2020, a date of October 14<sup>th</sup>, 2020, and then to a  
9 date of August 9<sup>th</sup>, 2021. Additionally, 4,832 articles were obtained. After removing duplicated studies via  
10 Endnote X9 software, 13,035 studies remained. By screening through titles and abstracts, 12,072 articles were  
11 removed for several reasons, including due to unsuitable types of work (5,025 studies), cost analysis (19 studies),  
12 and a lack of comparisons of smoking or alcohol on bone healing of adult human traumatic bone fractures (6,179  
13 studies), etc. After the eligibility process was conducted, another 860 full-text studies were excluded because  
14 seven papers were not in English, 47 papers had inapplicable types of work, and 265 papers had unrelated topics,  
15 etc. Finally, 103 studies published from 1977 to 2021 were included in the current study.

16

17 Forty-five of the 103 studies were not included in the meta-analysis for the following reasons: (1) n  
18 o outcome events occurred in either group; (2) no information on groups was observed in which outco  
19 me events had occurred; (3) a lack of data was observed on outcomes in each group; (4) only mean v  
20 alues were found without standard deviation (SD) values; (5) the control group may have included alco  
21 hol drinkers or former smokers; (6) definitions of delayed union, nonunion, or normal union with incor  
22 rect time periods or a lack of descriptions of time periods were observed; and (7) regarding time to u  
23 nion, data of patients with nonunion were excluded or were regarded as being the end of the follow-u  
24 p period. Only two studies mentioned malunion. However, no events occurred in the exposure group or  
25 control group. Therefore, a meta-analysis of malunion could not be conducted because of insufficient  
26 data.

27

### 28 **Appendix S4b. Preoperative smoking cessation time, NRT, and vaping**

29 For bone healing (**Appendix S3a**), wound healing and wound complications (**Appendix S3b**), two additional  
30 literature searches were performed to the date of April 27<sup>th</sup>, 2021. An updated search was performed to the date  
31 of August 9<sup>th</sup>, 2021.

32

33 For bone healing, we acquired 120 studies from MEDLINE, 229 studies from EMBASE, 13 studies from  
34 Cochrane CENTRAL, 36 studies from CINAHL, and 11 studies from AMED databases. After removing the  
35 duplicated studies, 269 studies were screened through titles and abstracts. Among them, 201 studies were removed  
36 via screening, and another 67 studies were removed via the eligibility process. Finally, one study concerning bone  
37 healing was included in the current study. Due to the fact that no more than one study was included, the quantitative  
38 analysis of bone healing could not be performed.

39

40 For wound healing and wound complications, we acquired 234 studies from MEDLINE, 479 studies  
41 from EMBASE, eight studies from Cochrane CENTRAL, 141 studies from CINAHL, 18 studies from  
42 AMED databases, and one study from an additional manual search of the references. After removing th  
43 e duplicated studies, 613 studies were screened through titles and abstracts. Three hundred and forty st  
44 udies were excluded via the screening process, and 255 studies were excluded via the full-text. Finally,  
45 18 studies concerning wound healing and wound complications were included in this study. Five of the  
46 studies were not included in the quantitative analysis because there was no more than one study on ea  
47 ch outcome.

## Appendix S5. Summary of 58 studies for the quantitative synthesis about the impacts of smoking and alcohol consumption

Summary of 58 studies for the quantitative synthesis about the impacts of smoking and alcohol consumption was described in Appendix S5a to d.

### S5a. Summary of 58 studies for the quantitative synthesis (part 1)

| No | First author/<br>Publication year | Journal name                                           | Country | Study design               | Sex<br>M/F | Age (years)<br>mean±SD (range)                                                                                                       | Race | BMI (kg/m <sup>2</sup> )<br>mean±SD<br>(range) | Height<br>(cm)<br>mean±SD<br>(range) | Weight<br>(kg)<br>mean±SD<br>(range) |
|----|-----------------------------------|--------------------------------------------------------|---------|----------------------------|------------|--------------------------------------------------------------------------------------------------------------------------------------|------|------------------------------------------------|--------------------------------------|--------------------------------------|
| 1  | Askew 2011[1]                     | The Open Bone Journal                                  | USA     | retrospective cohort study | 29/1       | GS 67.33±14.04 (28–88)<br>ConS 68.22±19.14 (38–89)<br>GA 64.25±11.92 (45–80)<br>ConA 69.83±17.30 (28–89)<br>Total 67.6±15.40 (28–89) | NA   | NA                                             | NA                                   | NA                                   |
| 2  | Bai 2019[2]                       | Medicine                                               | China   | case-control study         | 372/293    | 49.4±15.7 (18–77)                                                                                                                    | NA   | NA                                             | NA                                   | NA                                   |
| 3  | Ding 2014[3]                      | Journal of Orthopaedic Science                         | China   | case-control study         | 431/228    | Mean 45.22                                                                                                                           | NA   | NA                                             | NA                                   | NA                                   |
| 4  | Kent 2015[4]                      | European Journal of Orthopaedic Surgery & Traumatology | England | retrospective cohort study | 18/22      | GS 47.75±11.74 (28–65)<br>ConS 54.43±19.74 (27–87)<br>GA 50±13.71 (28–65)<br>ConA 52.85±18.61 (27–87)<br>Total 52.43±17.84 (27–87)   | NA   | NA                                             | NA                                   | NA                                   |
| 5  | Liu 2015[5]                       | Orthopaedics & Traumatology: Surgery & Research        | China   | case-control study         | 391/413    | Mean 54.6                                                                                                                            | NA   | Mean 19.64                                     | Mean 172.71                          | Mean 73.09                           |
| 6  | Ma 2017[6]                        | International Wound Journal                            | China   | case-control study         | 465/211    | Mean 44.6                                                                                                                            | NA   | Mean 25.26                                     | NA                                   | NA                                   |
| 7  | Mckissack 2019[7]                 | Injury                                                 | USA     | retrospective cohort study | NA         | NA                                                                                                                                   | NA   | NA                                             | NA                                   | NA                                   |
| 8  | Meng 2018[8]                      | International Wound Journal                            | China   | case-control study         | 1310/1295  | Mean 44.4 (18–82)                                                                                                                    | NA   | Mean 24.52                                     | NA                                   | NA                                   |
| 9  | Ovaska 2013[9]                    | The Journal of bone and joint surgery· American volume | Finland | case-control study         | NA         | NA                                                                                                                                   | NA   | NA                                             | NA                                   | NA                                   |

|    |                      |                                            |             |                            |           |                                                                                |                                                                                                                                |            |    |    |
|----|----------------------|--------------------------------------------|-------------|----------------------------|-----------|--------------------------------------------------------------------------------|--------------------------------------------------------------------------------------------------------------------------------|------------|----|----|
| 10 | Parker 2018[10]      | The Bone & Joint Journal                   | UK          | case-control study         | 340/118   | NA                                                                             | White (164)<br>Black Caribbean (13)<br>Black African (149)<br>Black Other (79)<br>Indian (23)<br>Pakistani (24)<br>Unknown (6) | NA         | NA | NA |
| 11 | Thorud 2017[11]      | The Journal of Foot & Ankle Surgery        | US          | case-control study         | 56/88     | 51.1±15.0                                                                      | White (106)<br>Black (14)<br>Other (24)                                                                                        | 31.4±7.1   | NA | NA |
| 12 | Bowen 2005[12]       | Clinical Orthopaedics and Related Research | US          | case-control study         | 96/50     | 47±18 (18–92 )                                                                 | NA                                                                                                                             | NA         | NA | NA |
| 13 | Chan 2019[13]        | Injury                                     | England     | case-control study         | 76/99     | 46.95±18.2                                                                     | NA                                                                                                                             | 26.1±4.8   | NA | NA |
| 14 | Claessen 2016[14]    | Clinical Orthopaedics and Related Research | USA         | case-control study         | 572/748   | Mean 54                                                                        | NA                                                                                                                             | NA         | NA | NA |
| 15 | Flynn 2000[15]       | Foot & Ankle International                 | Puerto Rico | retrospective cohort study | 66/32     | Mean 48.08 (18–85)                                                             | NA                                                                                                                             | NA         | NA | NA |
| 16 | Sun 2017[16]         | International Journal of Surgery           | China       | case-control study         | 673/574   | 44.1±14.4 (18–81)                                                              | NA                                                                                                                             | Mean 24.64 | NA | NA |
| 17 | Alzahrani 2018[17]   | Journal of Orthopaedics and Traumatology   | Canada      | retrospective cohort study | 74/28     | 34.9±12.8                                                                      | NA                                                                                                                             | NA         | NA | NA |
| 18 | Basques 2015[18]     | Journal of Orthopaedic Trauma              | US          | case-control study         | 222/297   | 52.3±15.8                                                                      | NA                                                                                                                             | 29.2±7.9   | NA | NA |
| 19 | Blair 2016[19]       | Journal of Orthopaedic Trauma              | US          | retrospective cohort study | 156/28    | Mean 42.21                                                                     | NA                                                                                                                             | NA         | NA | NA |
| 20 | Bone 1997[20]        | The Journal of Bone and Joint Surgery      | USA         | retrospective cohort study | 28/19     | GS 35.5±11.87 (21–57)<br>ConS 37.66±17.87 (18–72)<br>Total 36.83±15.73 (18–72) | NA                                                                                                                             | NA         | NA | NA |
| 21 | Branch 2015[21]      | The American Journal of Surgery            | USA         | retrospective cohort study | 6900/2506 | Mean 29                                                                        | White (5708)<br>black (2326)<br>others (1372)                                                                                  | NA         | NA | NA |
| 22 | Chu 2018[22]         | Tzu Chi Medical Journal                    | Taiwan      | retrospective cohort study | 82/38     | Mean 47.95                                                                     | NA                                                                                                                             | NA         | NA | NA |
| 23 | Donohue 2016[23]     | Journal of Orthopaedic Trauma              | US          | retrospective cohort study | 186/142   | Mean 42.19 (18–97)                                                             | NA                                                                                                                             | NA         | NA | NA |
| 24 | Enninghorst 2011[24] | the Journal of Trauma                      | Australia   | case-control study         | 66/23     | 41±7                                                                           | NA                                                                                                                             | NA         | NA | NA |
| 25 | Haller 2019[25]      | Journal of Orthopaedic Trauma              | US          | case-control study         | 370/148   | Mean 43.45 (18–81)                                                             | NA                                                                                                                             | NA         | NA | NA |



|    |                    |                                                        |             |                              |          |                                                               |                                                          |                         |    |    |
|----|--------------------|--------------------------------------------------------|-------------|------------------------------|----------|---------------------------------------------------------------|----------------------------------------------------------|-------------------------|----|----|
| 26 | Kim 2018[26]       | International Orthopaedics                             | South Korea | case-control study           | 14/59    | Mean 69.75 (43–87)                                            | NA                                                       | Mean 25.54              | NA | NA |
| 27 | Kuklo 2008[27]     | The Journal of bone and joint surgery· British volume  | USA         | retrospective cohort study   | 129/0    | Mean 26.6 (20–42)                                             | NA                                                       | NA                      | NA | NA |
| 28 | McDonald 2018[28]  | Foot & Ankle International                             | USA         | case-control study           | 129/152  | Median 51 (39–63)                                             | NA                                                       | Median 28.8 (26.3–33.3) | NA | NA |
| 29 | Moghaddam 2011[29] | Injury                                                 | Germany     | prospective cohort study     | 61/24    | GS 46±12 (22–79)<br>ConS 41±18 (18–84)<br>Total 44±15 (18–84) | NA                                                       | NA                      | NA | NA |
| 30 | Momaya 2016[30]    | Injury                                                 | US          | case-control study           | 341/191  | 47.76±15.2 (20–89)                                            | Black (178)<br>Other (11)<br>White (343)                 | NA                      | NA | NA |
| 31 | Morris 2013[31]    | Journal of Orthopaedic Trauma                          | US          | case-control study           | 193/109  | 45.7±14.3 (19–76)                                             | White (257)<br>non-white (45)                            | NA                      | NA | NA |
| 32 | Murray 2013[32]    | The Journal of bone and joint surgery· American volume | UK          | case-control study           | 678/263  | Mean 36.8 (18–94)                                             | NA                                                       | NA                      | NA | NA |
| 33 | Ozbek 2017[33]     | World Neurosurgery                                     | Turkey      | prospective cohort study     | 53/21    | Mean 38.98                                                    | NA                                                       | Mean 26.87              | NA | NA |
| 34 | Shah 2014[34]      | Journal of Orthopaedic Trauma                          | US          | retrospective cohort study   | 130/52   | Mean 44.74 (18–77)                                            | NA                                                       | NA                      | NA | NA |
| 35 | Singh 2018[35]     | Indian Journal of Orthopaedics                         | Singapore   | case-control study           | 111/8    | Mean 38.2 (18–70)                                             | Chinese (68)<br>Malay (18)<br>Indians (27)<br>Others (6) | NA                      | NA | NA |
| 36 | Snall 2015[36]     | Medicina oral, patologia oral y cirugia bucal          | Finland     | prospective randomised study | 36/1     | Mean 28 (18.1–50.9)                                           | NA                                                       | NA                      | NA | NA |
| 37 | Zumsteg 2014[37]   | Journal of Hand Surgery-American Volume                | US          | case-control study           | NA       | NA                                                            | NA                                                       | NA                      | NA | NA |
| 38 | Assous 2001[38]    | Injury                                                 | UK          | case series                  | NA       | Mean 35 (18–52)                                               | NA                                                       | NA                      | NA | NA |
| 39 | Hoffmann 2013[39]  | Journal of Orthopaedic Surgery and Research            | USA         | retrospective cohort study   | 49/57    | Mean 54 (18–95)                                               | NA                                                       | Mean 29.8 (17–67)       | NA | NA |
| 40 | Li 2017[40]        | International Orthopaedics                             | China       | case-control study           | 247/123  | Mean 46.19 (19–79)                                            | NA                                                       | NA                      | NA | NA |
| 41 | Lin 2013[41]       | European Journal of Orthopaedic Surgery & Traumatology | USA         | case-control study           | 170/81   | Mean 42.98 (18–78)                                            | NA                                                       | NA                      | NA | NA |
| 42 | McGarvey 2006[42]  | Foot & Ankle International                             | US          | case series                  | 24/7     | Mean 41.5 (19–64)                                             | NA                                                       | NA                      | NA | NA |
| 43 | Minhas 2019[43]    | Journal of Hand Surgery (American                      | US          | retrospective cohort study   | 2531/975 | NA                                                            | Caucasian ethnicity (2976)                               | NA                      | NA | NA |

|    |                      | Volume)                                    |             |                            |         |                       | non-Caucasian<br>(530)                                                                     |                       |    |    |
|----|----------------------|--------------------------------------------|-------------|----------------------------|---------|-----------------------|--------------------------------------------------------------------------------------------|-----------------------|----|----|
| 44 | Korim MT 2014[44]    | The Bone & Joint Journal                   | UK          | case-control study         | NA      | Mean 51 (18–100)      | NA                                                                                         | NA                    | NA | NA |
| 45 | Ren 2015[45]         | Clinics                                    | China       | case-control study         | NA      | NA                    | NA                                                                                         | NA                    | NA | NA |
| 46 | Spross 2012[46]      | Clinical Orthopaedics and Related Research | Switzerland | retrospective cohort study | 4/18    | Mean 75 (42–93)       | NA                                                                                         | NA                    | NA | NA |
| 47 | Benedick 2020[47]    | Foot & Ankle International                 | US          | retrospective cohort study | 446/457 | 45.3±16.3             | White (570)<br>Black (267)<br>Hispanic (58)<br>Other (5)                                   | 31.3±8.0              | NA | NA |
| 48 | Esposito 2019[48]    | Journal of Orthopaedic Trauma              | US          | case-control study         | 384/197 | median 45 (IQR 35–55) | NA                                                                                         | Median 27 (IQR 24–31) | NA | NA |
| 49 | Ogihara 2019[49]     | World Neurosurgery                         | Japan       | case-control study         | 331/292 | Mean 63.0 (18–97)     | NA                                                                                         | Mean 22.59            | NA | NA |
| 50 | Li 2020[50]          | Orthopaedic Surgery                        | China       | retrospective cohort study | 117/98  | 48.5±3.6              | NA                                                                                         | NA                    | NA | NA |
| 51 | Ahmed 2018[51]       | Journal of Orthopaedic Trauma              | Egypt       | case series                | 12/6    | 42.17±6.82 (33–55)    | NA                                                                                         | NA                    | NA | NA |
| 52 | Ukai 2020[52]        | J Orthop Traumatol                         | Japan       | case-control study         | 81/29   | Mean 44.5 (18–84)     | NA                                                                                         | Mean 23.22            | NA | NA |
| 53 | Olson 2020a[53]      | Injury                                     | US          | retrospective cohort study | 262/139 | 46±14 (18–87)         | White (329)<br>other/nonidentified (24)<br>Hispanic/Latino (20)<br>Black (20)<br>Asian (8) | 27±6 (24–30)          | NA | NA |
| 54 | Subramanyam 2021[54] | Injury                                     | India       | case-control study         | 81/19   | 38.06±13.98           | NA                                                                                         | NA                    | NA | NA |
| 55 | Mardanpour 2020[55]  | International Journal of Surgery Open      | Iran, US    | case-control study         | 512/276 | Mean 47.5 (20–70)     | NA                                                                                         | NA                    | NA | NA |
| 56 | Tan 2021[56]         | International Orthopaedics                 | China       | case-control study         | 483/337 | 51.3±14.4 (18–92)     | NA                                                                                         | NA                    | NA | NA |
| 57 | Zhu 2021[57]         | BMC Musculoskeletal Disorders              | China       | case-control study         | 193/171 | 53.7±17.0             | NA                                                                                         | 25.6±4.1              | NA | NA |
| 58 | Olson 2020b[58]      | JSES International                         | US          | case-control study         | 95/69   | Mean 44.9             | NA                                                                                         | Mean 30.5             | NA | NA |

Note: M: male; F: female; SD: standard deviation; BMI: bone mineral density; GS: smoking group; ConS: control group in smoking comparison; GA: alcohol drinking group; ConA: control group in alcohol drinking comparison; NA: not available; IQR: Interquartile range.

**S5b. Summary of 58 studies for the quantitative synthesis (part 2)**

| No | First author/<br>Publication<br>year | Inclusion and exclusion criteria                                                                                                                                                                                                                                                                                                                                                                                                                                                                                                                                                                                                             | type of fracture<br>(traumatic/non-<br>pathological/non-<br>metastatic fracture,<br>etc) | Non-<br>pathological<br>fracture or<br>unclear | Fracture<br>location | Diabetes                           | Use of<br>NSAIDs | Use of fluoro-<br>quinolone<br>family of<br>antibiotics |
|----|--------------------------------------|----------------------------------------------------------------------------------------------------------------------------------------------------------------------------------------------------------------------------------------------------------------------------------------------------------------------------------------------------------------------------------------------------------------------------------------------------------------------------------------------------------------------------------------------------------------------------------------------------------------------------------------------|------------------------------------------------------------------------------------------|------------------------------------------------|----------------------|------------------------------------|------------------|---------------------------------------------------------|
| 1  | Askew 2011                           | <b>Inclusion criteria:</b><br>Patients between the ages of 28 and 89 were treated operatively at the Omaha Veterans Affairs Medical Center between 1994 and 2000 for fractures of the femur and tibia shaft.<br><b>Exclusion criteria:</b><br>1. patients who lost to follow up,<br>2. patients who died prior to fracture healing<br>3. pathological fractures                                                                                                                                                                                                                                                                              | Non-pathological fracture                                                                | Non-pathological fracture                      | Femur, Tibia, Fibula | NA                                 | NA               | NA                                                      |
| 2  | Bai 2019                             | <b>Inclusion criteria:</b><br>(From March 2014 to February 2018) All patients aged 18 or older with acute distal femur fractures (AO/OTA 33) treated by ORIF with screws/plates or only screws were included.<br><b>Exclusion criteria:</b><br>1. age <18 years<br>2. pathologic fractures<br>3. metastatic fracture<br>4. patients who had implant removal only<br>5. patients who underwent surgical treatment of distal femur fracture at an outside hospital or who presented with surgical site infection after being treated at another hospital<br>6. those with incomplete data.                                                     | Non-pathological fracture, non-metastatic fracture                                       | Non-pathological fracture                      | Femur                | Total (65)                         | NA               | NA                                                      |
| 3  | Ding 2014                            | All patients who were treated for a humeral diaphyseal fracture at our institution from January 2005 through January 2011 were retrospectively identified by use of our electronic database.<br><b>Inclusion criteria were:</b><br>1. patients who underwent surgical fixation of a humeral diaphyseal fracture during the study period;<br>2. age 18 years or greater;<br>3. at least 9 months of clinical and radiographic follow-up.<br><b>Exclusion criteria were:</b><br>1. patients who presented with wound and/or bone infection;<br>2. fractures treated non-operatively;<br>3. pathological fracture due to metastatic bone tumor. | Non-pathological fracture due to metastatic bone tumor                                   | Non-pathological fracture                      | Humerus              | Total (50)                         | NA               | NA                                                      |
| 4  | Kent 2015                            | <b>Inclusion criteria:</b><br>All adult patients with a distal third tibial fracture treated with a locking plate between 01/01/2008 and 31/12/2011 at our institution with outpatient follow-up to the point of fracture union and discharge                                                                                                                                                                                                                                                                                                                                                                                                | Non-pathological fracture                                                                | Non-pathological fracture                      | Tibia                | GA (0)/ConA (1)<br>GS (0)/ConS (1) | NA               | NA                                                      |

|   |                |                                                                                                                                                                                                                                                                                                                                                                                                                                                                                                                                                                                                                                                                                                                                                                                                                                                                                                                                                                                                                                                                                                                                                                                                                                                                              |                                                                              |                           |          |            |    |    |
|---|----------------|------------------------------------------------------------------------------------------------------------------------------------------------------------------------------------------------------------------------------------------------------------------------------------------------------------------------------------------------------------------------------------------------------------------------------------------------------------------------------------------------------------------------------------------------------------------------------------------------------------------------------------------------------------------------------------------------------------------------------------------------------------------------------------------------------------------------------------------------------------------------------------------------------------------------------------------------------------------------------------------------------------------------------------------------------------------------------------------------------------------------------------------------------------------------------------------------------------------------------------------------------------------------------|------------------------------------------------------------------------------|---------------------------|----------|------------|----|----|
|   |                | <p>were included.<br/>These patients were identified from the theatre register and trauma database. Data was also collected from case notes and the PACS system and the Trauma and Orthopaedic Medical Information Officer collated the monetary and resource allocation data from the hospital finance department</p> <p><b>Exclusion criteria:</b></p> <ol style="list-style-type: none"> <li>1. patients &lt; 18 years of age</li> <li>2. patients with pathological fractures</li> </ol>                                                                                                                                                                                                                                                                                                                                                                                                                                                                                                                                                                                                                                                                                                                                                                                 |                                                                              |                           |          | Total (1)  |    |    |
| 5 | Liu 2015       | <p><b>Inclusion criteria:</b></p> <ol style="list-style-type: none"> <li>1. patients ≥ 18 years of age</li> <li>2. a fracture in the middle three-fifths of clavicle</li> <li>3. no fracture in other parts of body</li> <li>4. nonoperative treatment (brace or sling) until either confirmed fracture-healing or the development of nonunion</li> <li>5. adequate documentation of demographic details and clinical and radiographic follow-up until fracture-healing or the development of nonunion</li> </ol> <p><b>Exclusion criteria:</b></p> <ol style="list-style-type: none"> <li>1. no demographic data could be gained during the follow-up study</li> <li>2. incomplete clinical or demographic data</li> <li>3. lost to follow-up before fracture union was determined</li> <li>4. patients who underwent operative treatment after nonoperative treatment (within two weeks of injury), including (1) skin or neurovascular compromise, (2) pathological fracture, floating shoulder, or other multifocal shoulder girdle injury, (3) a request by the patient, (4) a decision of the treating surgeon.</li> <li>5. patients who underwent early operative treatment from two to 24 weeks after injury before the development of definite nonunion.</li> </ol> | Non-pathological fracture                                                    | Non-pathological fracture | Clavicle | NA         | NA | NA |
| 6 | Ma 2017        | <p><b>Inclusion criteria:</b></p> <p>Adult patients (18 years or older) with acute close tibial plateau fractures treated with ORIF at the 6th Hospital of Xinjiang Medical University from January 2012 to February 2017 were included in this study.</p> <p><b>The exclusion criteria:</b></p> <ol style="list-style-type: none"> <li>1. patients &lt; 18 years</li> <li>2. pathological fractures</li> <li>3. periprosthetic fractures</li> <li>4. old fractures (&gt; 21 days from initial injury)</li> </ol>                                                                                                                                                                                                                                                                                                                                                                                                                                                                                                                                                                                                                                                                                                                                                            | Non-pathological fracture, non-periprosthetic fracture, and non-old fracture | Non-pathological fracture | Tibia    | Total (20) | NA | NA |
| 7 | Mckissack 2019 | <p><b>Inclusion criteria:</b></p> <p>A retrospective chart review of patients age 18 years and older who underwent ORIF for a medial malleolar, lateral malleolar, posterior malleolar, bimalleolar, or trimalleolar ankle fracture at a single institution between 2008 and 2018 was conducted. Patients were selected using Current Procedural Terminology (CPT) codes 27766,</p>                                                                                                                                                                                                                                                                                                                                                                                                                                                                                                                                                                                                                                                                                                                                                                                                                                                                                          | NA                                                                           | Unclear                   | Ankle    | NA         | NA | NA |

|    |             |                                                                                                                                                                                                                                                                                                                                                                                                                                                                                                                                                                                                                                                                                                                                                                                                                                                                                             |                                                                          |                           |                    |             |    |    |
|----|-------------|---------------------------------------------------------------------------------------------------------------------------------------------------------------------------------------------------------------------------------------------------------------------------------------------------------------------------------------------------------------------------------------------------------------------------------------------------------------------------------------------------------------------------------------------------------------------------------------------------------------------------------------------------------------------------------------------------------------------------------------------------------------------------------------------------------------------------------------------------------------------------------------------|--------------------------------------------------------------------------|---------------------------|--------------------|-------------|----|----|
|    |             | 27769, 27784, 27792, 27814, 27822, and 27829.<br>(Note: CPT code mentioned above is a medical procedural code under the range - Fracture and/or Dislocation Procedures on the Leg (Tibia and Fibula) and Ankle Joint.)<br><b>Exclusion criteria:</b><br>1. patients with polytraumatic injuries<br>2. open fractures<br>3. pilon fractures                                                                                                                                                                                                                                                                                                                                                                                                                                                                                                                                                  |                                                                          |                           |                    |             |    |    |
| 8  | Meng 2018   | <b>Inclusion criteria:</b><br>From the electronic registry system and patients' electronic medical records, all adult patients (18 years and older) who had undergone ORIF of an ankle fracture from January 2013 to December 2016 were identified.<br><b>Exclusion criteria:</b><br>1. patients <18 years<br>2. pathological fractures<br>3. metastatic fracture<br>4. old fractures (>21 days from initial injury)<br>5. treatments other than ORIF (external fixation, conservative treatments, closed reduction and internal fixation, traction).                                                                                                                                                                                                                                                                                                                                       | Non-pathological fracture, non-metastatic fracture, and non-old fracture | Non-pathological fracture | Ankle              | Total (155) | NA | NA |
| 9  | Ovaska 2013 | <b>Inclusion criteria:</b><br>All patients who had undergone surgery to treat an ankle fracture at our institution from January 2006 through December 2009 were identified by querying the hospital surgical procedure database for diagnoses coded with International Classification of Diseases, Tenth Revision (ICD-10), for fibular fracture (S82.4), medial malleolar fracture (S82.5), lateral malleolar fracture (S82.6), and bimalleolar or trimalleolar fracture (S82.8) and for procedure codes for internal or external fixation of ankle fractures. Eligible surgical procedures were restricted to those performed primarily at our institution in patients eighteen years of age or older. We identified 1923 ankle fracture operations in 1915 patients who were all definitively treated with open reduction and internal fixation (ORIF).<br><b>Exclusion criteria:</b> NA | NA                                                                       | Unclear                   | Ankle              | Total (29)  | NA | NA |
| 10 | Parker 2018 | <b>Inclusion criteria:</b><br>The trial recruited adult patients with open fractures of the lower limb graded as Gustilo–Anderson 1 two or above, all of whom were treated in a United Kingdom Major Trauma Centre or Trauma Unit with joint orthopaedic and plastic surgical care.<br><b>Exclusion criteria:</b> NA                                                                                                                                                                                                                                                                                                                                                                                                                                                                                                                                                                        | NA                                                                       | Unclear                   | lower limb         | Total (27)  | NA | NA |
| 11 | Thorud 2017 | <b>Inclusion criteria:</b><br>The present study was a retrospective review of patients aged 18 to 90 years, selected using the International Classification of Diseases, 9th Revision, Clinical Modification (ICD-9-CM), diagnosis codes for fractures of the ankle and metatarsals, presenting from January 1, 2006                                                                                                                                                                                                                                                                                                                                                                                                                                                                                                                                                                        | Non-pathological fracture                                                | Non-pathological fracture | Ankle, Metatarsals | Total (36)  | NA | NA |

|    |               |                                                                                                                                                                                                                                                                                                                                                                                                                                                                                                                                                                                                                                                                                                                                               |                           |                           |                                             |             |    |    |
|----|---------------|-----------------------------------------------------------------------------------------------------------------------------------------------------------------------------------------------------------------------------------------------------------------------------------------------------------------------------------------------------------------------------------------------------------------------------------------------------------------------------------------------------------------------------------------------------------------------------------------------------------------------------------------------------------------------------------------------------------------------------------------------|---------------------------|---------------------------|---------------------------------------------|-------------|----|----|
|    |               | to January 1, 2012 to Baylor Scott & White Health Memorial Hospital. We included both patients who had undergone operative and nonoperative treatment of fracture.<br><b>Exclusion criteria:</b><br>1. patients who died before 18 months after the fracture diagnosis<br>2. pathologic fractures                                                                                                                                                                                                                                                                                                                                                                                                                                             |                           |                           |                                             |             |    |    |
| 12 | Bowen 2005    | <b>Inclusion criteria:</b><br>The medical records of all patients presenting to a Level I trauma center with an acute, traumatic, open fracture of at least one long bone between June 1, 2000 and June 1, 2003 were reviewed retrospectively. Institutional review board approval was obtained before initiation of the study.<br><b>Exclusion criteria:</b><br>1. patients < 18 years<br>2. patients with preexisting infection<br>3. patients who had penetrating trauma<br>4. patients receiving antibiotic treatment before the injury for a condition not related to the open fracture<br>5. patients with open fractures of the hands, feet, spine, and pelvis without long bone involvement<br>6. patients with pathologic fractures. | Non-pathological fracture | Non-pathological fracture | long bones (leg, thigh, forearm, upper arm) | Total (13)  | NA | NA |
| 13 | Chan 2019     | A retrospective analysis of 210 consecutive patients surgically treated for tibial plateau fractures at two Level I trauma centres (Major Trauma Centres) between January 2015 and April 2017 was performed.<br><b>Inclusion criteria:</b><br>1. patients over 18 years of age<br>2. operative treatment with open reduction internal fixation<br>3. a minimum of 6-months follow-up<br><b>Exclusion criteria:</b><br>1. patients under 18 years of age<br>2. those treated with circular frames, intramedullary fixation or percutaneous screw fixation                                                                                                                                                                                      | NA                        | Unclear                   | Tibia                                       | Total (14)  | NA | NA |
| 14 | Claessen 2016 | <b>Inclusion criteria:</b><br>We retrospectively reviewed 1380 adult patients who underwent surgery for an elbow fracture between January 2002 and July 2014 at four area hospitals. Patients were identified using Current Procedural Terminology (CPT) codes for elbow fractures (Appendix 1. Supplemental materials are available with the online version of CORR1.).<br><b>Exclusion criteria:</b><br>1. patients who had prior surgery for an elbow fracture elsewhere<br>2. patients who had a fracture through a malignant tumor                                                                                                                                                                                                       | Non-metastatic fracture   | Non-pathological fracture | Elbow                                       | Total (143) | NA | NA |

|    |                |                                                                                                                                                                                                                                                                                                                                                                                                                                                                                                                                                                                                                                                                                                          |                                                |                           |          |            |    |    |
|----|----------------|----------------------------------------------------------------------------------------------------------------------------------------------------------------------------------------------------------------------------------------------------------------------------------------------------------------------------------------------------------------------------------------------------------------------------------------------------------------------------------------------------------------------------------------------------------------------------------------------------------------------------------------------------------------------------------------------------------|------------------------------------------------|---------------------------|----------|------------|----|----|
|    |                | 3. patients who had a nonunion<br>4. patients who had more than one skin incision<br>5. patients who died owing to respiratory failure after the surgery.                                                                                                                                                                                                                                                                                                                                                                                                                                                                                                                                                |                                                |                           |          |            |    |    |
| 15 | Flynn 2000     | <b>Inclusion criteria:</b><br>We studied all patients with closed ankle fractures that were treated from January 1, 1988 to June 31, 1997. Criteria for inclusion in the study was age greater than 18 years, isolated closed lateral malleolar, medial malleolar, bimalleolar, or trimalleolar fracture and adequate follow-up during the period in which the study was performed.<br><b>Exclusion criteria:</b><br>1. patients with Charcot neuroarthropathy<br>2. patients who died<br>3. patients who were lost to follow-up during initial treatment<br>4. patients who were unable to be contacted for further follow-up.                                                                          | NA                                             | Unclear                   | Ankle    | Total (25) | NA | NA |
| 16 | Sun 2017       | <b>Inclusion criteria:</b><br>All adult patients (≥18 years) undergoing ORIF of a closed ankle fracture from July 2015 through January 2017 were identified by querying patients' electronic medical records (EMR).<br><b>Exclusion criteria:</b><br>1. patients <18 years<br>2. open fractures<br>3. pathological fractures<br>4. old fractures (>21 days from injury)<br>5. other treatments for reduction and fixation of ankle fracture such as external fixation, conservative treatments, manual reduction and internal fixation and traction et al.                                                                                                                                               | Non-pathological fracture and non-old fracture | Non-pathological fracture | Ankle    | Total (84) | NA | NA |
| 17 | Alzahrani 2018 | <b>Inclusion criteria:</b><br>patients age greater than 18 years with a minimum of 12 months of clinical follow-up after the index surgery. Surgical indications included acute, mid-shaft clavicle fractures with significant shortening (> 2 cm) or displacement (> 100% of clavicle width), open fractures, impending skin compromise, associated neurological or vascular injury and polytrauma patients.<br><b>Exclusion criteria:</b><br>1. patients who required operative treatment for a symptomatic nonunion or malunion after failed non-operative treatment<br>2. pathological fractures<br>3. patients with insufficient radiographs that precluded classification of the fracture pattern. | Non-pathological fracture                      | Non-pathological fracture | Clavicle | NA         | NA | NA |
| 18 | Basques 2015   | <b>Inclusion criteria:</b><br>Patients who underwent ORIF for tibial plateau fracture from 2009 to 2012 were identified in the ACS-NSQIP database. Tibial plateau fracture patients were identified using International Classification of                                                                                                                                                                                                                                                                                                                                                                                                                                                                | NA                                             | Unclear                   | Tibia    | Total (55) | NA | NA |

|    |            |                                                                                                                                                                                                                                                                                                                                                                                                                                                                                                                                                                                                                                                                                                                                                                                                                                                                                                                                                                                                                           |    |         |       |    |    |    |
|----|------------|---------------------------------------------------------------------------------------------------------------------------------------------------------------------------------------------------------------------------------------------------------------------------------------------------------------------------------------------------------------------------------------------------------------------------------------------------------------------------------------------------------------------------------------------------------------------------------------------------------------------------------------------------------------------------------------------------------------------------------------------------------------------------------------------------------------------------------------------------------------------------------------------------------------------------------------------------------------------------------------------------------------------------|----|---------|-------|----|----|----|
|    |            | <p>Diseases, ninth Revision, diagnosis codes 823.00, 823.02, 823.10, and 823.12. Only those who received ORIF for tibial plateau fracture [Current Procedural Terminology codes 27535 (unicondylar tibial plateau fracture) and 27536 (bicondylar tibial plateau fracture)] were included for analysis.</p> <p><b>Exclusion criteria:</b></p> <ol style="list-style-type: none"> <li>1. patients with incomplete perioperative data</li> <li>2. Current Procedural Terminology codes that indicated a surgical procedure other than tibial plateau ORIF.</li> </ol>                                                                                                                                                                                                                                                                                                                                                                                                                                                       |    |         |       |    |    |    |
| 19 | Blair 2016 | <p><b>Inclusion criteria:</b></p> <p>Skeletally mature patients must have had an acute tibial plateau fracture operatively treated with a plate and screw construct or tibial shaft fracture operatively treated with an intramedullary rod in the setting of acute compartment syndrome (ACS) requiring fasciotomy. The diagnosis of ACS was made by clinical judgment of the attending orthopaedic surgeon.</p> <p><b>Exclusion criteria:</b></p> <ol style="list-style-type: none"> <li>1. patients who had an associated vascular injury (ie, Gustilo-Anderson IIIC open fracture)</li> <li>2. patients &lt;18 years of age</li> <li>3. patients who had incomplete medical records to determine the time at which union or complication occurred</li> <li>4. patients who had a tibial plateau fracture definitively treated with an implant other than a plate and screw construct or a tibial shaft fracture treated with an implant other than an intramedullary rod (eg, circular external fixation).</li> </ol> | NA | Unclear | Tibia | NA | NA | NA |
| 20 | Bone 1997  | <p><b>Inclusion criteria:</b></p> <p>The criteria for inclusion in the study were an age of at least sixteen years, a closed displaced fracture of the tibial diaphysis (from five centimeters distal to the tibial tuberosity to seven centimeters proximal to the ankle joint), and an absence of associated compartment syndrome or neurovascular injury.</p> <p><b>Exclusion criteria:</b> NA</p>                                                                                                                                                                                                                                                                                                                                                                                                                                                                                                                                                                                                                     | NA | Unclear | Tibia | NA | NA | NA |



|    |              |                                                                                                                                                                                                                                                                                                                                                                                                                                                                                                                                                                                                                                           |    |         |               |             |                                                                                                                                                             |    |
|----|--------------|-------------------------------------------------------------------------------------------------------------------------------------------------------------------------------------------------------------------------------------------------------------------------------------------------------------------------------------------------------------------------------------------------------------------------------------------------------------------------------------------------------------------------------------------------------------------------------------------------------------------------------------------|----|---------|---------------|-------------|-------------------------------------------------------------------------------------------------------------------------------------------------------------|----|
| 21 | Branch 2015  | <p><b>Inclusion criteria:</b><br/>Patients were identified using International Classification of Diseases, Ninth Revision, Clinical Modification (ICD9-CM) codes for open femoral fractures</p> <p>2. patients <math>\geq</math>418 years old, and underwent ORIF (ICD-9 code: 79.35) of the femur at a level I or level II trauma center.</p> <p><b>Exclusion criteria:</b><br/>1. patients who were dead on arrival<br/>2. patients who died in the emergency department<br/>3. patients whose race/ethnicity was not documented<br/>4. level III trauma center patients<br/>5. where the trauma center classification was unknown.</p> | NA | Unclear | Femur         | Total (605) | NA                                                                                                                                                          | NA |
| 22 | Chu 2018     | <p><b>Inclusion criteria:</b><br/>1. having a displaced middle-third clavicle fracture (Robinson type 2B1/2B2)<br/>2. age between 30 and 65 years<br/>3. having a complete record of radiographic and functional evaluations at regular follow-up periods of at least 6 months.</p> <p><b>Exclusion criteria:</b><br/>1. bilateral clavicle fracture<br/>2. fracture associated with other fractures or major injuries<br/>3. another trauma at the time of follow-up<br/>4. initial injury combined with injured skin integrity or skin tenting of the fracture fragment.</p>                                                            | NA | Unclear | Clavicle      | Total (14)  | NA                                                                                                                                                          | NA |
| 23 | Donohue 2016 | <p><b>Inclusion criteria:</b><br/>patients with femoral (OTA 32) or tibial (OTA 42)16 shaft fractures who were treated with reamed, statically locked intramedullary rod fixation were identified, and their electronic medical records were screened to identify patients who were skeletally mature. Both open and closed fractures were included.</p> <p><b>Exclusion criteria:</b><br/>1. 1-year follow-up data were not available<br/>2. an NSAID other than ketorolac was administered.</p>                                                                                                                                         | NA | Unclear | Femur , Tibia | Total (46)  | received ketorolac in the postanesthesia care unit or on the ward within the first 24 hours after the surgical procedure<br>GS (32) ConS (53)<br>Total (85) | NA |

|    |                  |                                                                                                                                                                                                                                                                                                                                                                                                                                                                                                                                                                                                                                                                                                                                                                                                                                                                                                                                                                                                                                                                                                                                                                                                                |                                                    |                           |       |            |    |    |
|----|------------------|----------------------------------------------------------------------------------------------------------------------------------------------------------------------------------------------------------------------------------------------------------------------------------------------------------------------------------------------------------------------------------------------------------------------------------------------------------------------------------------------------------------------------------------------------------------------------------------------------------------------------------------------------------------------------------------------------------------------------------------------------------------------------------------------------------------------------------------------------------------------------------------------------------------------------------------------------------------------------------------------------------------------------------------------------------------------------------------------------------------------------------------------------------------------------------------------------------------|----------------------------------------------------|---------------------------|-------|------------|----|----|
| 24 | Enninghorst 2011 | <p><b>Inclusion criteria:</b><br/>A 36-month prospective cohort study was performed between January 1, 2007, and December 31, 2009, at the John Hunter Hospital (University of Newcastle affiliated Level 1 trauma center) in New South Wales, Australia. Consecutive adult (age 18 years) blunt trauma patients with open tibia shaft fractures (Orthopedic Trauma Association code 42A, B, and C) were included in this observational study.</p> <p><b>Exclusion criteria:</b> NA</p>                                                                                                                                                                                                                                                                                                                                                                                                                                                                                                                                                                                                                                                                                                                        | NA                                                 | Unclear                   | Tibia | NA         | NA | NA |
| 25 | Haller 2019      | <p><b>Inclusion criteria:</b><br/>Patients greater than 18 years of age with a minimum of 12-month follow-up. Medical records were reviewed for demographic data including age, sex, tobacco use, and mechanism of injury.</p>                                                                                                                                                                                                                                                                                                                                                                                                                                                                                                                                                                                                                                                                                                                                                                                                                                                                                                                                                                                 | NA                                                 | Unclear                   | Tibia | Total (31) | NA | NA |
| 26 | Kim 2018         | <p><b>Inclusion criteria:</b><br/>From January 2009 to December 2015, 86 patients (86 fractures) who had been operatively treated for distal femur fractures (AO/OTA type 33) caused by <b>low-energy trauma</b> were retrospectively recruited from five secondary or tertiary trauma centres (Seoul Medical Center, Ajou University Hospital, Hanyang University Hospital, Kangnam Sacred Heart Hospital, and Hallym Sacred Heart Hospital) of South Korea. A low-energy trauma was defined as a fall from a standing height or less.</p> <p><b>Exclusion criteria:</b><br/>1. patients who had associated injuries occurring at the affected leg or pelvis or sustained a periprosthetic fracture around hip prostheses<br/>2. patients due to a previous experience of fracture or infection of the effected femur (no pathologic fractures from metastatic malignancies were found)<br/>3. patients who experienced a peri-plate fracture after a ground-level fall prior to bone healing within six weeks following surgery<br/>4. a new trauma is responsible for the need for further surgery<br/>5. patients who were lost to follow-up before bony union<br/>6. patients with insufficient data.</p> | Non-prosthetic fracture, Non-pathological fracture | Non-pathological fracture | Femur | Total (22) | NA | NA |
| 27 | Kuklo 2008       | <p><b>Inclusion criteria:</b><br/>Between March 2004 and March 2005, 138 Gustilo-Anderson type IIIB and IIIC segmental tibial fractures in 138 soldiers returning from Iraq were treated at the Walter Reed Army Medical Centre.</p> <p><b>Exclusion criteria:</b><br/>1. patients with a head injury<br/>2. patients who were lost to follow-up</p>                                                                                                                                                                                                                                                                                                                                                                                                                                                                                                                                                                                                                                                                                                                                                                                                                                                           | NA                                                 | Unclear                   | Tibia | NA         | NA | NA |
| 28 | McDonald 2018    | <p><b>Inclusion criteria:</b><br/>Patients with an isolated, closed ankle fracture (AO fracture classification 44-A and 44-B) definitively managed with ORIF were</p>                                                                                                                                                                                                                                                                                                                                                                                                                                                                                                                                                                                                                                                                                                                                                                                                                                                                                                                                                                                                                                          | Non-pathological fracture                          | Non-pathological fracture | Ankle | Total (27) | NA | NA |

|    |                |                                                                                                                                                                                                                                                                                                                                                                                                                                                                                                                                                                                                                                                                                                          |                           |                           |          |            |    |    |
|----|----------------|----------------------------------------------------------------------------------------------------------------------------------------------------------------------------------------------------------------------------------------------------------------------------------------------------------------------------------------------------------------------------------------------------------------------------------------------------------------------------------------------------------------------------------------------------------------------------------------------------------------------------------------------------------------------------------------------------------|---------------------------|---------------------------|----------|------------|----|----|
|    |                | included.<br><b>Exclusion criteria:</b><br>1. patients with pilon fractures, open injuries, polytrauma with other lower extremity fractures<br>2. pathological fractures<br>3. allergy to ketorolac<br>4. renal insufficiency                                                                                                                                                                                                                                                                                                                                                                                                                                                                            |                           |                           |          |            |    |    |
| 29 | Moghaddam 2011 | <b>Inclusion criteria:</b><br>all consenting patients over 18 years of age exhibiting radiological evidence of a tibial shaft fracture were considered for inclusion in this study.<br><b>Exclusion criteria:</b><br>1. any fracture line that extended proximally to the knee joint or distally to the ankle joint<br>2. multiple traumas<br>3. significant soft-tissue damage<br>4. injuries other than a lower leg fracture<br>5. type III open fracture according to the Gustilo classification                                                                                                                                                                                                      | NA                        | Unclear                   | Tibia    | Total (1)  | NA | NA |
| 30 | Momaya 2016    | <b>Inclusion criteria:</b><br>1. articular fracture (AO/OTA B/C)<br>2. age >19 years.<br><b>Exclusion criteria:</b><br>1. patients who were: pregnant<br>2. patients who had insufficient documentation for review<br>3. patients who transferred following any surgery other than damage control orthopaedic procedures.                                                                                                                                                                                                                                                                                                                                                                                | NA                        | Unclear                   | Tibia    | Total (69) | NA | NA |
| 31 | Morris 2013    | <b>Inclusion criteria:</b><br>A total of 302 patients aged 18 years and older were identified as undergoing operative fixation during this time period and were included in the study.<br><b>Exclusion criteria:</b> NA                                                                                                                                                                                                                                                                                                                                                                                                                                                                                  | NA                        | Unclear                   | Tibia    | Total (22) | NA | NA |
| 32 | Murray 2013    | <b>Inclusion criteria:</b><br>1. a fracture in the middle three-fifths of the clavicle<br>2. complete displacement of the main fragments with no cortical contact<br>3. initial nonoperative treatment until either confirmed fracture-healing or the development of nonunion, using criteria stipulated below<br>4. adequate documentation of demographic details and clinical and radiographic follow-up until fracture healing or the development of nonunion.<br><b>Exclusion criteria:</b><br>1. documentation of demographic data was missing and we had been unable to gain further information during the follow-up study<br>2. incomplete documentation of clinical and/or radiographic outcome | Non-pathological fracture | Non-pathological fracture | Clavicle | NA         | NA | NA |

|    |            |                                                                                                                                                                                                                                                                                                                                                                                                                                                                                                                                                                                                                                                                  |                                                                               |                           |                                |            |    |    |
|----|------------|------------------------------------------------------------------------------------------------------------------------------------------------------------------------------------------------------------------------------------------------------------------------------------------------------------------------------------------------------------------------------------------------------------------------------------------------------------------------------------------------------------------------------------------------------------------------------------------------------------------------------------------------------------------|-------------------------------------------------------------------------------|---------------------------|--------------------------------|------------|----|----|
|    |            | <p>3. patients who were lost to follow-up before union status was determined</p> <p>4. patients who underwent primary operative treatment (within two weeks of injury), which was performed as a result of skin or neurovascular compromise</p> <p>5. pathological fracture</p> <p>6. floating shoulder</p> <p>7. other multifocal shoulder girdle injury</p> <p>8. a request by the patient</p> <p>9. a decision of the treating surgeon</p> <p>10. patients who underwent early operative treatment from two to twenty-four weeks after injury (at their request or as a result of a decision of the surgeon) before the development of definite nonunion.</p> |                                                                               |                           |                                |            |    |    |
| 33 | Ozbek 2017 | <p><b>Inclusion criteria:</b></p> <p>1. Fractures after acute trauma</p> <p>2. Type A3 and A4 fractures (according to AO classification)</p> <p><b>Exclusion criteria:</b></p> <p>1. Osteoporosis (T-score [BMD] &lt;-2.5 SD)</p> <p>2. Pathologic fracture; History of malignancy</p> <p>3. Neurological damage</p> <p>4. Decompression with laminectomy</p> <p>5. Multiple level fractures</p> <p>6. Other trauma in addition to spinal trauma</p> <p>7. Younger than 20 years and older than 60 years old</p> <p>8. Nonintact bilateral pedicle</p> <p>9. Comorbidity (diabetes, chronic kidney failure, steroid use)</p>                                     | Non-osteoporotic fracture, Non-pathological fracture, Non-metastatic fracture | Non-pathological fracture | T11, T12, L1, and L2 vertebrae | Total (0)  | NA | NA |
| 34 | Shah 2014  | <p><b>Inclusion criteria:</b></p> <p>1. aged &gt;18 years</p> <p>2. OTA classification 41C and 43C fractures treated with 2-staged provisional external fixation followed by delayed open reduction internal fixation</p> <p>3. patients with follow-up available through radiographic healing.</p> <p><b>Exclusion criteria:</b></p> <p>1. patients whose injury was associated with compartment syndrome requiring fasciotomy</p> <p>2. patients who had follow-up of less than 3 months.</p>                                                                                                                                                                  | NA                                                                            | Unclear                   | Tibia                          | Total (22) | NA | NA |
| 35 | Singh 2018 | <p><b>Inclusion criteria:</b></p> <p>adults (age ≥18 years) with open diaphyseal tibial fractures who presented during the study. Patients were identified through operative records as well as in-house electronic discharge coding.</p> <p><b>Exclusion criteria:</b></p> <p>Patients with delayed presentations (i.e., referrals from other local and overseas centers)</p>                                                                                                                                                                                                                                                                                   | NA                                                                            | Unclear                   | Tibia                          | NA         | NA | NA |
| 36 | Snall 2015 | <p><b>Inclusion criteria:</b></p> <p>patients aged 18 years or more who had participated in a randomised</p>                                                                                                                                                                                                                                                                                                                                                                                                                                                                                                                                                     | NA                                                                            | Unclear                   | Mandible                       | NA         | NA | NA |

|    |               |                                                                                                                                                                                                                                                                                                                                                                                                                                                                                                                                                                                                                                              |                                                        |                           |              |            |    |    |
|----|---------------|----------------------------------------------------------------------------------------------------------------------------------------------------------------------------------------------------------------------------------------------------------------------------------------------------------------------------------------------------------------------------------------------------------------------------------------------------------------------------------------------------------------------------------------------------------------------------------------------------------------------------------------------|--------------------------------------------------------|---------------------------|--------------|------------|----|----|
|    |               | <p>study aimed at clarifying the benefits of dexamethasone on pain, oedema and nausea after open reduction and fixation of a facial fracture.</p> <p><b>Exclusion criteria:</b></p> <ol style="list-style-type: none"> <li>1. patients with infected fractures</li> <li>2. a history of liver or kidney dysfunction</li> <li>3. a history of peptic ulcer</li> <li>4. a history of psychosis due to steroid use</li> <li>5. pregnancy</li> <li>6. breastfeeding or allergy to any constituent of the dexamethasone preparation used.</li> </ol>                                                                                              |                                                        |                           |              |            |    |    |
| 37 | Zumsteg 2014  | <p><b>Inclusion criteria:</b></p> <ol style="list-style-type: none"> <li>1. patients 18 years of age and older</li> <li>2. presence of an open fracture of the radius and/or ulna</li> <li>3. availability of accurate information regarding time of injury and clinical care within the medical record.</li> </ol> <p><b>Exclusion criteria:</b></p> <ol style="list-style-type: none"> <li>1. patients with ballistic injuries or traumatic amputations</li> <li>2. patients with inadequate information in the medical record</li> </ol>                                                                                                  | NA                                                     | Unclear                   | Radius, Ulna | Total (16) | NA | NA |
| 38 | Assous 2001   | <p><b>Inclusion criteria:</b></p> <p>Clinical notes of the last 40 patients who had internal fixation of the Os clacis were reviewed. The age of patients ranged from 18 to 52 years (mean 35 years).</p> <p><b>Exclusion criteria:</b> NA</p>                                                                                                                                                                                                                                                                                                                                                                                               | NA                                                     | Unclear                   | Calcaneus    | Total (2)  | NA | NA |
| 39 | Hoffmann 2013 | <p><b>Inclusion criteria:</b></p> <p>All patients with supracondylar femoral fracture treated with locked plate fixation and age equal to or older than 18 years were included in this study.</p> <p><b>Exclusion criteria:</b></p> <ol style="list-style-type: none"> <li>1. patients with intramedullary fixation</li> <li>2. patients with metastatic disease</li> <li>3. impaired lower extremity motor or nerve function prior to injury</li> <li>4. supplemental methods for bone healing</li> </ol>                                                                                                                                   | Non-metastatic fracture                                | Non-pathological fracture | Femur        | Total (21) | NA | NA |
| 40 | Li 2017       | <p><b>Inclusion criteria:</b></p> <p>Our investigation retrospectively identified patients 18 years or older with acute tibial plateau fractures treated by ORIF at our trauma and emergency center from January 2015 to June 2016, with post-operative follow-up ranged from two to 12 months. Patients with complete follow-up data could be included in this study.</p> <p><b>Exclusion criteria:</b></p> <ol style="list-style-type: none"> <li>1. patients younger than 18 years</li> <li>2. fractures around the prosthesis</li> <li>3. pathological fractures</li> <li>4. old fractures (&gt;21 days from initial injury).</li> </ol> | Non-periprosthetic fracture, non-pathological fracture | Non-pathological fracture | Tibia        | Total (22) | NA | NA |

|    |               |                                                                                                                                                                                                                                                                                                                                                                                                                                                                                                                                                                                                                                                                                                                                                                                                                                                                                                |                         |                           |                     |             |    |    |
|----|---------------|------------------------------------------------------------------------------------------------------------------------------------------------------------------------------------------------------------------------------------------------------------------------------------------------------------------------------------------------------------------------------------------------------------------------------------------------------------------------------------------------------------------------------------------------------------------------------------------------------------------------------------------------------------------------------------------------------------------------------------------------------------------------------------------------------------------------------------------------------------------------------------------------|-------------------------|---------------------------|---------------------|-------------|----|----|
| 41 | Lin 2013      | <p><b>Inclusion criteria:</b><br/>we retrospectively identified patients who had sustained an intra-articular fracture of the proximal tibia as well as received ORIF for treatment by querying the Hospital Medical Informatics database for admissions coded with International Classification of Diseases, Ninth Revision, Clinical Modification (ICD-9-CM) procedure codes. Eligible operations were restricted to those performed by an orthopedic surgeon in patients 18 years of age or older. Three hundred and twenty-seven consecutive patients with tibial plateau fractures (332 cases) who underwent ORIF between January 2004 and December 2010 were identified.</p> <p><b>Exclusion criteria:</b><br/>1. patients who had &lt;6 months follow-up<br/>2. patients who died of polytrauma after definitive fixation<br/>3. patients who had insufficient medical record data.</p> | NA                      | Unclear                   | Tibia               | Total (19)  | NA | NA |
| 42 | McGarvey 2006 | <p><b>No inclusion or exclusion criteria</b><br/>A subset of patients was collected prospectively between October of 1998 and January of 2003. All fractures of the calcaneus were treated at our institution by one surgeon (WCM). Thirty-three fractures in 31 patients were treated with indirect reduction and external fixation. The average age of the 24 men and seven women at the time of injury was 41.5 (19 to 64) years</p>                                                                                                                                                                                                                                                                                                                                                                                                                                                        | NA                      | Unclear                   | Calcaneus           | Total (1)   | NA | NA |
| 43 | Minhas 2019   | <p><b>Inclusion criteria:</b><br/>Patients undergoing operative fixation were identified through Current Procedural Terminology (CPT) codes. These included open and percutaneous stabilization of metacarpal fractures or metacarpal fracture-dislocations (CPT 26615, 26650 26665, 26676, 26685, and 26686) and open and percutaneous stabilization of proximal and middle phalanx fractures or fracture-dislocations (CPT 26706, 26715, 26717, 26727, 26735, 26746, 26776, and 26785).</p> <p><b>Exclusion criteria:</b><br/>1. Distal phalanx fractures<br/>2. Polytrauma patients</p>                                                                                                                                                                                                                                                                                                     | NA                      | Unclear                   | Metacarpal, phalanx | Total (192) | NA | NA |
| 44 | Korim MT 2014 | <p><b>Inclusion criteria:</b><br/>Patients who underwent ORIF of a fracture of the ankle between April 2010 and February 2013 were identified from the trauma database.</p> <p><b>Exclusion criteria:</b><br/>1. patients aged &lt; 18 years old<br/>2. patients with a fracture of the tibial plafond.</p>                                                                                                                                                                                                                                                                                                                                                                                                                                                                                                                                                                                    | NA                      | Unclear                   | Ankle               | Total (10)  | NA | NA |
| 45 | Ren 2015      | <p><b>Inclusion criteria:</b><br/>1. patient age of 18 years or greater<br/>2. patients who underwent surgical fixation of a pilon fracture during the study period<br/>3. at least 12 months of clinical and radiographic follow-up.</p> <p><b>Exclusion criteria:</b></p>                                                                                                                                                                                                                                                                                                                                                                                                                                                                                                                                                                                                                    | Non-metastatic fracture | Non-pathological fracture | Tibia               | NA          | NA | NA |

|    |               |                                                                                                                                                                                                                                                                                                                                                                                                                                                                                                                                                                   |                                                                                             |                           |         |             |    |    |
|----|---------------|-------------------------------------------------------------------------------------------------------------------------------------------------------------------------------------------------------------------------------------------------------------------------------------------------------------------------------------------------------------------------------------------------------------------------------------------------------------------------------------------------------------------------------------------------------------------|---------------------------------------------------------------------------------------------|---------------------------|---------|-------------|----|----|
|    |               | <ol style="list-style-type: none"> <li>1. pregnancy</li> <li>2. lactation</li> <li>3. sepsis</li> <li>4. human immuno-deficiency virus-1 (HIV) infection</li> <li>5. any site infection within the past thirty days</li> <li>6. patients who underwent initial fracture surgery at an outside hospital or presented with SSIs after being treated at another hospital</li> <li>7. metastatic fractures</li> <li>8. death within 30 days of initial surgery</li> <li>9. severe concomitant disease of other systems.</li> </ol>                                    |                                                                                             |                           |         |             |    |    |
| 46 | Spross 2012   | <p><b>Inclusion criteria:</b><br/>a traumatic Neer Group VI fracture treated either by the PHILOS1 plate or primary HA and a minimum of 12 months follow-up.</p> <p><b>Exclusion criteria:</b> NA</p>                                                                                                                                                                                                                                                                                                                                                             | traumatic fracture                                                                          | Non-pathological fracture | Humerus | NA          | NA | NA |
| 47 | Benedick 2020 | <p><b>Inclusion criteria:</b></p> <ol style="list-style-type: none"> <li>1. age 18 years or older at the time of injury</li> <li>2. patients who sustained an Orthopaedic Trauma Association (OTA) 44B or 44C9 torsional ankle fracture</li> <li>3. patients who underwent fixation of their ankle fracture</li> <li>4. patients who had at least 6 weeks of clinical follow-up from the date of surgery.</li> </ol> <p><b>Exclusion criteria:</b><br/>Patients with missing data regarding intraoperative lower extremity tourniquet use</p>                     | NA                                                                                          | Unclear                   | Ankle   | Total (125) | NA | NA |
| 48 | Esposito 2019 | <p><b>Inclusion criteria:</b></p> <ol style="list-style-type: none"> <li>1. Patients who underwent operative treatment for Arbeitsgemeinschaft für Osteosynthesefragen/Orthopaedic Trauma Association (AO/OTA) 43-B and 43-C fractures</li> <li>2. patients who were 18 years and older</li> </ol> <p><b>Exclusion criteria:</b></p> <ol style="list-style-type: none"> <li>1. extra-articular AO/OTA 43-A fractures</li> <li>2. fractures deemed mainly tibial shaft with extension into the tibial plafond</li> <li>3. trimalleolar ankle fractures.</li> </ol> | NA                                                                                          | Unclear                   | Tibia   | Total (37)  | NA | NA |
| 49 | Ogihara 2019  | <p><b>Inclusion criteria:</b><br/>In this study, spinal trauma was defined as spinal fracture and/or dislocation. Patients who had undergone conventional posterior open instrumented surgery;</p> <p><b>Exclusion criteria:</b></p> <ol style="list-style-type: none"> <li>1. patients with pathologic spinal fracture such as tumoral or infectious spinal abnormalities</li> <li>2. patients who had undergone minimally invasive (MI) surgery with percutaneous pedicle screws</li> </ol>                                                                     | Traumatic fracture, non-pathological fracture (such as tumoral or infectious abnormalities) | Non-pathological fracture | spine   | Total (76)  | NA | NA |

|    |                  |                                                                                                                                                                                                                                                                                                                                                                                                                     |                           |                           |                     |                               |    |    |
|----|------------------|---------------------------------------------------------------------------------------------------------------------------------------------------------------------------------------------------------------------------------------------------------------------------------------------------------------------------------------------------------------------------------------------------------------------|---------------------------|---------------------------|---------------------|-------------------------------|----|----|
|    |                  | 3. patients <18 years and/or who had undergone single-stage anterior-posterior surgery                                                                                                                                                                                                                                                                                                                              |                           |                           |                     |                               |    |    |
| 50 | Li 2020          | <b>Inclusion criteria:</b><br>1. patients with open tibial fracture injury time, first debridement time, and complete prognosis data<br>2. hospital stay longer than 2 weeks<br>3. patients followed for more than 10 weeks.<br><b>Exclusion criteria:</b><br>1. patients with multiple open fractures<br>2. patients with amputated open fractures<br>3. patients with hyperthyroidism and hematological diseases. | NA                        | Unclear                   | Tibia               | Total (22)                    | NA | NA |
| 51 | Ahmed 2018       | <b>Inclusion criteria:</b><br>1. pilon fractures with late presentation more than 1 month without definitive treatment<br>2. management by the Ilizarov fixator<br>3. a minimum follow-up of 1.5 years<br><b>Exclusion criteria:</b><br>1. acute fractures<br>2. patients who were lost to follow-up                                                                                                                | NA                        | Unclear                   | Tibia               | GS (2), ConS (1)<br>Total (3) | NA | NA |
| 52 | Ukai 2020        | <b>Inclusion criteria:</b><br>patients with lower limb open fractures of G–A type III who were followed up for at least 2 years after the surgical procedure.<br><b>Exclusion criteria:</b><br>1. open fractures of the upper limb and foot<br>2. closed fractures<br>3. open fractures of G–A types I, II, and IIIC                                                                                                | NA                        | Unclear                   | Femur, tibia, ankle | Total (5)                     | NA | NA |
| 53 | Olson 2020a      | <b>Inclusion criteria:</b><br>1. patients with diagnosis of a closed complete articular (OTA/AO 43C1–3) fracture treated with ORIF.<br>2. patients 18 years of age and older.<br><b>Exclusion criteria:</b><br>Any simple ankle fractures, extraarticular or partial-articular distal tibia fractures, or open fractures                                                                                            | NA                        | Unclear                   | Tibia               | Total (26)                    | NA | NA |
| 54 | Subramanyam 2021 | <b>Inclusion criteria:</b><br>1. displaced fractures (any fracture that was displaced by 2 mm or more or angulated by 5 °or more on radiographs at pre- sentation was diagnosed as a displaced fracture)<br>2. skeletally mature patients (more than 18 years of age)<br>3. presentation within three days of injury.<br><b>Exclusion criteria:</b><br>1. undisplaced fractures                                     | Non-pathological fracture | Non-pathological fracture | Clavicle            | Total (7)                     | NA | NA |



|    |                 |                                                                                                                                                                                                                                                                                                                                                                                                                                                                 |                                                                            |                           |            |            |    |    |
|----|-----------------|-----------------------------------------------------------------------------------------------------------------------------------------------------------------------------------------------------------------------------------------------------------------------------------------------------------------------------------------------------------------------------------------------------------------------------------------------------------------|----------------------------------------------------------------------------|---------------------------|------------|------------|----|----|
|    |                 | 2. skeletally immature patients (age less than 18 years)<br>3. delayed presentation to our department, open fractures, pathological fractures, bilateral fractures, and associated other fractures or visceral injuries.                                                                                                                                                                                                                                        |                                                                            |                           |            |            |    |    |
| 55 | Mardanpour 2020 | <b>Inclusion criteria:</b><br>adult patients who underwent the ORIF procedure for acetabulum fracture at three educational hospitals<br><b>Exclusion criteria:</b><br>1. younger patients <18 years, old patient >70 years<br>2. pathological fractures<br>3. old fractures more than two weeks after injury<br>4. other operation rather than ORIF                                                                                                             | Non-pathological fracture                                                  | Non-pathological fracture | acetabulum | NA         | NA | NA |
| 56 | Tan 2021        | <b>Inclusion criteria:</b><br>1. age > 18 years,<br>2. diagnosed with closed isolated patella fractures<br>3. patients agreed to participate in the study<br>4. patients underwent surgical treatment.<br><b>Exclusion criteria:</b><br>1. pathologic fracture<br>2. old fractures (> 21 days)<br>3. periprosthetic fractures<br>4. patients with incomplete data<br>5. patients who received SSI treatment in our hospital but did not undergo initial surgery | Non-periprosthetic fracture, Non-pathological fracture                     | Non-pathological fracture | patella    | Total (64) | NA | NA |
| 57 | Zhu 2021        | <b>Inclusion criteria:</b><br>1. patients who were 18 years old and over with acute distal femur fractures treated by ORIF<br><b>Exclusion criteria:</b><br>1. age less than 18 years old<br>2. old fractures (> 21 days from earliest trauma)<br>3. pathological fractures<br>4. first treatment at other hospitals.                                                                                                                                           | Non-pathological fracture                                                  | Non-pathological fracture | Femur      | Total (86) | NA | NA |
| 58 | Olson 2020b     | <b>Inclusion criteria:</b><br>1. adult patients with humeral shaft fractures who presented to an urban level I trauma center<br><b>Exclusion criteria:</b><br>1. periprosthetic or pathological fracture<br>2. patients with less than one-year clinical follow-up                                                                                                                                                                                              | Non-pathological fracture, traumatic fracture, non-periprosthetic fracture | Non-pathological fracture | Humerus    | Total (19) | NA | NA |

Note: NSAIDs: non-steroidal anti-inflammatory drugs; NA: not available; GS: smoking group; ConS: control group in smoking comparison; GA: alcohol drinking group; ConA: control group in alcohol drinking comparison; ORIF: open reduction and internal fixation; BMD: bone mineral density; SD: standard deviation.

### S5c. Summary of 58 studies for the quantitative synthesis (part 3)

| No | First author /Publication year | Treatment                                                                                                                                                                                                                                                                    | Operative or nonoperative treatment             | Smoking type | Smoking dose  | Smoking group                                       | Smoking Control group         |
|----|--------------------------------|------------------------------------------------------------------------------------------------------------------------------------------------------------------------------------------------------------------------------------------------------------------------------|-------------------------------------------------|--------------|---------------|-----------------------------------------------------|-------------------------------|
| 1  | Askew 2011                     | 1. Dynamic hip screw; 2. ORIF; 3. ORIF/dynamic hip screw; 4. gamma long nail; 5. ORIF / dynamic condylar screw; 6. retrograde nail; 7. ORIF/Ilizarov external fixation; 8. closed cast; 9. ORIF/plate/cable; 10. intramedullary nail; 11. iliac crest bone graft /closed rod | mixture of operative and nonoperative treatment | NA           | NA            | Smoking history (current and former smokers) (n=21) | Non-smoking history (n=9)     |
| 2  | Bai 2019                       | ORIF with screws/plates or only screws                                                                                                                                                                                                                                       | operative treatment                             | NA           | NA            | Smoking (n=148)                                     | Non-smoking (n=517)           |
| 3  | Ding 2014                      | 1. Plate fixation<br>2. Intramedullary nailing                                                                                                                                                                                                                               | operative treatment                             | NA           | NA            | Smoking history (n=165)                             | Non-smoking history (n=494)   |
| 4  | Kent 2015                      | locking plate                                                                                                                                                                                                                                                                | operative treatment                             | NA           | NA            | Smokers (n=12)                                      | Non-smokers (n=28)            |
| 5  | Liu 2015                       | treated nonoperatively                                                                                                                                                                                                                                                       | nonoperative treatment                          | NA           | NA            | Smokers (n=155)                                     | Non-smokers (n=649)           |
| 6  | Ma 2017                        | ORIF                                                                                                                                                                                                                                                                         | operative treatment                             | NA           | NA            | Current smoking (n=73)                              | non-current smoking (n=603)   |
| 7  | Mckissack 2019                 | ORIF                                                                                                                                                                                                                                                                         | operative treatment                             | NA           | NA            | Tobacco use (n=NA)                                  | Non-tobacco use (n=NA)        |
| 8  | Meng 2018                      | ORIF                                                                                                                                                                                                                                                                         | operative treatment                             | NA           | NA            | Current smoking (n=554)                             | Non-current smoking (n=2,063) |
| 9  | Ovaska 2013                    | ORIF                                                                                                                                                                                                                                                                         | operative treatment                             | NA           | NA            | Tobacco use (n=64)                                  | Non-tobacco use (n=198)       |
| 10 | Parker 2018                    | NA                                                                                                                                                                                                                                                                           | NA                                              | NA           | NA            | Smokers (n=147)                                     | Non-smokers (n=300)           |
| 11 | Thorud 2017                    | operative and nonoperative treatment                                                                                                                                                                                                                                         | mixture of operative and nonoperative treatment | NA           | not mentioned | Active+quit smokers (n=55)                          | Never smoked (n=85)           |
| 12 | Bowen 2005                     | all fracture care, including surgery                                                                                                                                                                                                                                         | mixture of operative and nonoperative treatment | NA           | NA            | Tobacco use (n=65)                                  | Non-tobacco use (n=97)        |
| 13 | Chan 2019                      | ORIF                                                                                                                                                                                                                                                                         | operative treatment                             | NA           | NA            | Smoking (n=43)                                      | Non-smoking                   |

|    |                |                                                                                                                                                                                                                                                                                                       |                                                 |           |                                                                                                   |                                                 |                               |
|----|----------------|-------------------------------------------------------------------------------------------------------------------------------------------------------------------------------------------------------------------------------------------------------------------------------------------------------|-------------------------------------------------|-----------|---------------------------------------------------------------------------------------------------|-------------------------------------------------|-------------------------------|
|    |                |                                                                                                                                                                                                                                                                                                       |                                                 |           |                                                                                                   |                                                 | (n=101)                       |
| 14 | Claessen 2016  | 1. plate and screw fixation<br>2. screw alone<br>3. tension band wire<br>4. radial head arthroplasty<br>5. other fixation type<br>6. external fixation before surgery including radial head arthroplasty, maybe combined with fixation, so maybe there is no need to exclude radial head arthroplasty | operative treatment                             | NA        | NA                                                                                                | Smoking (n=343)                                 | Non-smoking (n=977)           |
| 15 | Flynn 2000     | closed reduction and immobilization and ORIF.                                                                                                                                                                                                                                                         | mixture of operative and nonoperative treatment | cigarette | 1. no smoking ever<br>2. moderate smoking (<1 pack per day)<br>3. heavy smoking (>1 pack per day) | Heavy smokers (n=16)<br>Moderate smoking (n=25) | Non-smokers (n=57)            |
| 16 | Sun 2017       | ORIF                                                                                                                                                                                                                                                                                                  | operative treatment                             | NA        | NA                                                                                                | Current smoking (n=262)                         | Non-current smoking (n=985)   |
| 17 | Alzahrani 2018 | ORIF                                                                                                                                                                                                                                                                                                  | operative treatment                             | NA        | NA                                                                                                | Smokers (n=19)                                  | Non-smokers (n=83)            |
| 18 | Basques 2015   | ORIF                                                                                                                                                                                                                                                                                                  | operative treatment                             | NA        | NA                                                                                                | Smoking history (n=170)                         | Non-smoking history (n=349)   |
| 19 | Blair 2016     | operatively treated with a plate and screw construct<br>operatively treated with an intramedullary rod in the setting of acute compartment syndrome requiring fasciotomy                                                                                                                              | operative treatment                             | NA        | NA                                                                                                | Smokers (n=48)                                  | Non-smokers (n=136)           |
| 20 | Bone 1997      | closed intramedullary nailing, closed reduction and above-the-knee-cast                                                                                                                                                                                                                               | mixture of operative and nonoperative treatment | NA        | NA                                                                                                | History of smoking (n=18)                       | Non-history of smoking (n=29) |
| 21 | Branch 2015    | ORIF                                                                                                                                                                                                                                                                                                  | operative treatment                             | NA        | NA                                                                                                | Smoking history (n=827)                         | Non-smoking history (n=8,579) |
| 22 | Chu 2018       | ORIF, conservative treatment                                                                                                                                                                                                                                                                          | mixture of operative and nonoperative treatment | NA        | NA                                                                                                | Smoking (n=24)                                  | Non-smoking (n=96)            |
| 23 | Donohue 2016   | reamed, statically locked intramedullary rod fixation                                                                                                                                                                                                                                                 | operative treatment                             | NA        | NA                                                                                                | Smoking (n=109)                                 | Non-smoking (n=219)           |
| 24 | Enninghorst    | intramedullary nailing                                                                                                                                                                                                                                                                                | mixture of operative and nonoperative treatment | NA        | NA                                                                                                | Smokers                                         | Non-smok                      |

|    |                |                                                                                             |                                                 |           |    |                                                |                            |
|----|----------------|---------------------------------------------------------------------------------------------|-------------------------------------------------|-----------|----|------------------------------------------------|----------------------------|
|    | 2011           | external fixation<br>closed reduction and application of plaster<br>percutaneous plating    | ment                                            |           |    | (n=23)                                         | ers<br>(n=66)              |
| 25 | Haller 2019    | NA                                                                                          | NA                                              | NA        | NA | Tobacco use<br>(n=118)                         | Non-tobacco use<br>(n=400) |
| 26 | Kim 2018       | minimally invasive lateral locked plating                                                   | operative treatment                             | NA        | NA | Smoking<br>(n=5)                               | Non-smoking<br>(n=68)      |
| 27 | Kuklo 2008     | ringed fixator or reamed intramedullary nail                                                | operative treatment                             | NA        | NA | Smokers<br>(n=14)                              | non-smokers<br>(n=115)     |
| 28 | McDonald 2018  | ORIF                                                                                        | operative treatment                             | NA        | NA | Current+ former smokers<br>(n=73)              | Non-smokers<br>(n=208)     |
| 29 | Moghaddam 2011 | Intramedullary nailing; Osteosynthesis plate; External fixation; Cast                       | mixture of operative and nonoperative treatment | cigarette | NA | Current smokers and previous smokers<br>(n=46) | Non-smokers<br>(n=39)      |
| 30 | Momaya 2016    | tibial plateau ORIF                                                                         | operative treatment                             | NA        | NA | Tobacco use<br>(n=240)                         | Non-tobacco use<br>(n=292) |
| 31 | Morris 2013    | splinting or external fixator                                                               | mixture of operative and nonoperative treatment | NA        | NA | Smokers<br>(n=137)                             | Non-smokers<br>(n=165)     |
| 32 | Murray 2013    | nonoperative treatment                                                                      | nonoperative treatment                          | NA        | NA | Smokers<br>(n=219)                             | Non-smokers<br>(n=722)     |
| 33 | Ozbek 2017     | Fusion                                                                                      | operative treatment                             | NA        | NA | Smokers<br>(n=19)                              | Non-smokers<br>(n=56)      |
| 34 | Shah 2014      | 2-staged provisional external fixation followed by delayed open reduction internal fixation | operative treatment                             | NA        | NA | Smokers<br>(n=71)                              | Non-smokers<br>(n=111)     |
| 35 | Singh 2018     | Intramedullary fixation;<br>Extramedullary fixation;<br>External fixation                   | operative treatment                             | NA        | NA | Smokers<br>(n=26)                              | Non-smokers<br>(n=77)      |
| 36 | Snall 2015     | Open reduction and fixation with the aid of titanium miniplates                             | operative treatment                             | NA        | NA | Smokers<br>(n=23)                              | Non-smokers<br>(n=14)      |
| 37 | Zumsteg 2014   | internal fixation<br>external fixation                                                      | operative treatment                             | NA        | NA | Smokers<br>(n=63)                              | Non-smokers                |

|    |               |                                                        |                     |           |                                  |                                |                                 |
|----|---------------|--------------------------------------------------------|---------------------|-----------|----------------------------------|--------------------------------|---------------------------------|
|    |               |                                                        |                     |           |                                  |                                | (n=137)                         |
| 38 | Assous 2001   | internal fixation                                      | operative treatment | cigarette | from 10 to 40 cigarettes per day | Smokers (n=13)                 | Non-smokers (n=27)              |
| 39 | Hoffmann 2013 | locked plate fixation                                  | operative treatment | NA        | NA                               | Current+ former smokers (n=41) | Non-smokers (n=70)              |
| 40 | Li 2017       | ORIF                                                   | operative treatment | NA        | NA                               | Tobacco consumption (n=62)     | Non-tobacco consumption (n=308) |
| 41 | Lin 2013      | ORIF                                                   | operative treatment | NA        | NA                               | Smokers (n=105)                | Non-smokers (n=151)             |
| 42 | McGarvey 2006 | indirect reduction and external fixation               | operative treatment | NA        | NA                               | Smokers (n=8)                  | Non-smokers (n=23)              |
| 43 | Minhas 2019   | open and percutaneous stabilization                    | operative treatment | NA        | NA                               | Smokers (n=1,112)              | Non-smokers (n=2,394)           |
| 44 | Korim MT 2014 | ORIF                                                   | operative treatment | NA        | NA                               | Smokers (n=18)                 | Non-smokers (n=692)             |
| 45 | Ren 2015      | External fixation with limited internal fixation; ORIF | operative treatment | NA        | NA                               | Smoking history (n=69)         | Non-smoking history (n=450)     |
| 46 | Spross 2012   | Angular stable reconstruction using the PHILOS plate   | operative treatment | cigarette | more than 10 cigarettes per day  | Smokers (n=7)                  | Non-smokers (n=15)              |
| 47 | Benedick 2020 | fixation                                               | operative treatment | NA        | NA                               | Tobacco use (n=402)            | Non-tobacco use (n=501)         |
| 48 | Esposito 2019 | ORIF                                                   | operative treatment | NA        | NA                               | Smoking (n=154)                | Non-smoking (n=410)             |
| 49 | Ogihara 2019  | conventional posterior open instrumented surgery       | operative treatment | NA        | NA                               | Smoking (n=60)                 | Non-smoking (n=563)             |
| 50 | Li 2020       | external fixation limited internal fixation            | operative treatment | NA        | NA                               | Tobacco use (n=84)             | Non-tobacco use (n=131)         |
| 51 | Ahmed 2018    | Ilizarov fixator                                       | operative treatment | NA        | NA                               | Smoking (n=8)                  | Non-smoking                     |

|    |                  |                                            |                                                 |    |    |                       |                            |
|----|------------------|--------------------------------------------|-------------------------------------------------|----|----|-----------------------|----------------------------|
|    |                  |                                            |                                                 |    |    |                       | (n=10)                     |
| 52 | Ukai 2020        | ORIF/external fixation                     | operative treatment                             | NA | NA | Smoking (n=56)        | Non-smoking (n=58)         |
| 53 | Olson 2020a      | ORIF                                       | operative treatment                             | NA | NA | Tobacco use (n=99)    | Non-tobacco use (n=302)    |
| 54 | Subramanyam 2021 | eight clavicular brace and broad arm sling | nonoperative treatment                          | NA | NA | Smokers (n=4)         | Non-smokers (n=96)         |
| 55 | Mardanpour 2020  | ORIF                                       | operative treatment                             | NA | NA | Current smoker (n=NA) | non-current smoker (n=NA)  |
| 56 | Tan 2021         | surgery                                    | operative treatment                             | NA | NA | Current smoker (n=99) | non-current smoker (n=721) |
| 57 | Zhu 2021         | ORIF                                       | operative treatment                             | NA | NA | Smoking (n=50)        | Non-smoking (n=314)        |
| 58 | Olson 2020b      | ORIF, conservative treatment               | mixture of operative and nonoperative treatment | NA | NA | Tobacco use (n=75)    | Non-tobacco use (n=89)     |

Note: ORIF: open reduction and internal fixation; NA: not available.

#### S5d. Summary of 58 studies for the quantitative synthesis (part 4)

| No | First author / Publication year | Alcohol type | Level of alcohol consumption | Alcohol group               | Alcohol Control                 | Follow-up mean±SD, range                                             | At least 1 concurrent fracture at other sites or not |
|----|---------------------------------|--------------|------------------------------|-----------------------------|---------------------------------|----------------------------------------------------------------------|------------------------------------------------------|
| 1  | Askew 2011                      | NA           | NA                           | Alcoholics (n=12)           | Never drinking (n=17)           | Follow-up was performed<br>NA                                        | No                                                   |
| 2  | Bai 2019                        | NA           | NA                           | Alcohol consumption (n=263) | Non-alcohol consumption (n=402) | NA                                                                   | No                                                   |
| 3  | Ding 2014                       | NA           | NA                           | Drinking (n=206)            | Non-drinking (n=453)            | Mean 14.8 (9–24) months                                              | No                                                   |
| 4  | Kent 2015                       | NA           | NA                           | Alcohol dependency (n=6)    | Non-alcohol dependency (n=34)   | follow-up to the point of fracture union<br>33.88±15.91 (8–78) weeks | No                                                   |
| 5  | Liu 2015                        | NA           | NA                           | Alcohol                     | Non-alcohol                     | Follow-up was performed                                              | No                                                   |

|    |                |    |                                                                                                                           |                                                                    |                                   |                                                                                               |     |
|----|----------------|----|---------------------------------------------------------------------------------------------------------------------------|--------------------------------------------------------------------|-----------------------------------|-----------------------------------------------------------------------------------------------|-----|
|    |                |    |                                                                                                                           | (n=233)                                                            | (n=571)                           | NA                                                                                            |     |
| 6  | Ma 2017        | NA | NA                                                                                                                        | Drinking alcohol<br>(n=281)                                        | Non-drinking<br>(n=395)           | NA                                                                                            | Yes |
| 7  | Mckissack 2019 | NA | NA                                                                                                                        | NA                                                                 | NA                                | 2 weeks, 6 weeks, 3 months,<br>6 months and 12 months                                         | No  |
| 8  | Meng 2018      | NA | NA                                                                                                                        | Drinking alcohol<br>(n=658)                                        | Non-drinking<br>(n=1,959)         | NA                                                                                            | Yes |
| 9  | Ovaska 2013    | NA | NA                                                                                                                        | Alcohol abuse<br>(n=41)                                            | Non-alcohol abuse<br>(n=221)      | NA                                                                                            | No  |
| 10 | Parker 2018    | NA | Alcohol intake:<br>0-7 units<br>8-14 units<br>15-21 units<br>>21 units                                                    | 8-14 units (n=79)<br>15-21 units (n=45)<br>>21 units (n=51)        | 0-7 units<br>(n=269)              | 1 year                                                                                        | No  |
| 11 | Thorud 2017    | NA | NA                                                                                                                        | Alcohol history<br>(n=37)                                          | Non-alcohol history<br>(n=107)    | Follow-up was performed<br>NA                                                                 | No  |
| 12 | Bowen 2005     | NA | NA                                                                                                                        | Alcohol use<br>(n=37)                                              | Non-alcohol use<br>(n=125)        | primary care provider: 486±3<br>12 (97-1374) days<br>Orthopaedics: 354±260 (97-1<br>374) days | Yes |
| 13 | Chan 2019      | NA | ≥14 units per week                                                                                                        | Alcohol over users<br>(n=30)                                       | Non-alcohol over users<br>(n=120) | ≥6months                                                                                      | No  |
| 14 | Claessen 2016  | NA | NA                                                                                                                        | Alcohol abuse<br>(n=69)                                            | Non-alcohol abuse<br>(n=1,251)    | at least 4 months                                                                             | No  |
| 15 | Flynn 2000     | NA | 1. no alcohol consumption ever<br>2. moderate consumption (<2 drinks per day)<br>3. heavy consumption (>2 drinks per day) | Heavy alcohol consumption<br>(n=20)<br>Moderate drinking<br>(n=33) | Non-alcohol consumption<br>(n=45) | 3.5±2.4 years (10 months to<br>10 years)                                                      | No  |
| 16 | Sun 2017       | NA | NA                                                                                                                        | Alcohol drinking<br>(n=251)                                        | Non-alcohol drinking<br>(n=996)   | NA                                                                                            | No  |
| 17 | Alzahrani 2018 | -  | -                                                                                                                         | -                                                                  | -                                 | minimum of 12 months                                                                          | No  |
| 18 | Basques 2015   | -  | -                                                                                                                         | -                                                                  | -                                 | NA                                                                                            | No  |
| 19 | Blair 2016     | -  | -                                                                                                                         | -                                                                  | -                                 | Follow-up was performed<br>NA                                                                 | No  |
| 20 | Bone 1997      | -  | -                                                                                                                         | -                                                                  | -                                 | GS 4.36±1.49 (2-6.5) years<br>ConS 4.33±1.48 (2-6.5) years<br>Total 4.34±1.47 (2-6.5) years   | No  |
| 21 | Branch 2015    | -  | -                                                                                                                         | -                                                                  | -                                 | NA                                                                                            | No  |
| 22 | Chu 2018       | -  | -                                                                                                                         | -                                                                  | -                                 | at least 6months                                                                              | No  |

|    |                  |    |    |   |   |                                                                           |     |
|----|------------------|----|----|---|---|---------------------------------------------------------------------------|-----|
| 23 | Donohue 2016     | -  | -  | - | - | 1 year                                                                    | Yes |
| 24 | Enninghorst 2011 | -  | -  | - | - | 12 months                                                                 | No  |
| 25 | Haller 2019      | -  | -  | - | - | Mean 27 (12–115) months                                                   | No  |
| 26 | Kim 2018         | -  | -  | - | - | 17.3±7.5 (6–44) months                                                    | No  |
| 27 | Kuklo 2008       | -  | -  | - | - | Mean 15.6 (12–32) months                                                  | No  |
| 28 | McDonald 2018    | -  | -  | - | - | minimum 4 months                                                          | No  |
| 29 | Moghaddam 2011   | -  | -  | - | - | GS 38 (6–60) months<br>ConS 35 (7–60) months<br>Total 39 (6–60)           | No  |
| 30 | Momaya 2016      | -  | -  | - | - | 19.5 months                                                               | No  |
| 31 | Morris 2013      | -  | -  | - | - | 14.1 months                                                               | No  |
| 32 | Murray 2013      | -  | -  | - | - | Follow-up was continued until clinical and radiographic evidence of union | No  |
| 33 | Ozbek 2017       | -  | -  | - | - | 33.77 months                                                              | Yes |
| 34 | Shah 2014        | -  | -  | - | - | 12.5 months                                                               | No  |
| 35 | Singh 2018       | -  | -  | - | - | minimum follow up period was 6 months (maximum 72 months)                 | No  |
| 36 | Snall 2015       | -  | -  | - | - | 6 (3–9) months                                                            | No  |
| 37 | Zumsteg 2014     | -  | -  | - | - | at least 6-month                                                          | No  |
| 38 | Assous 2001      | -  | -  | - | - | 27 (12–42) months                                                         | No  |
| 39 | Hoffmann 2013    | -  | -  | - | - | 23.3 (6–72) months                                                        | Yes |
| 40 | Li 2017          | -  | -  | - | - | (2–12) months                                                             | No  |
| 41 | Lin 2013         | -  | -  | - | - | 18 months                                                                 | Yes |
| 42 | McGarvey 2006    | -  | -  | - | - | 25 (6–55) months                                                          | Yes |
| 43 | Minhas 2019      | -  | -  | - | - | Follow-up was performed NA                                                | No  |
| 44 | Korim MT 2014    | -  | -  | - | - | minimum of 6 months                                                       | No  |
| 45 | Ren 2015         | -  | -  | - | - | 19.1 (12–29) months                                                       | No  |
| 46 | Spross 2012      | -  | -  | - | - | a minimum of 12 months                                                    | No  |
| 47 | Benedick 2020    | NA | NA | - | - | 47.6 weeks (6 weeks to 10 years)                                          | No  |
| 48 | Esposito 2019    | -  | -  | - | - | NA                                                                        | Yes |
| 49 | Ogihara 201      | -  | -  | - | - | minimum of 12 months                                                      | No  |



|    | 9                |    |    |                               |                                    |                                                                                                   |     |
|----|------------------|----|----|-------------------------------|------------------------------------|---------------------------------------------------------------------------------------------------|-----|
| 50 | Li 2020          | NA | NA | Alcohol drinking<br>(n=52)    | Non-drinking<br>(n=163)            | (97–1374) days                                                                                    | No  |
| 51 | Ahmed 2018       | -  | -  | -                             | -                                  | GS 29·88±9·80 (18–45) months<br>ConS 44·5±44·84 (18–168) months<br>Total 38±34·06 (18–168) months | No  |
| 52 | Ukai 2020        | -  | -  | -                             | -                                  | Mean 37 (24–119) months                                                                           | Yes |
| 53 | Olson 2020a      | -  | -  | -                             | -                                  | median 1·7 (1·1–3·7) years                                                                        | No  |
| 54 | Subramanyam 2021 | -  | -  | -                             | -                                  | 1 year                                                                                            | No  |
| 55 | Mardanpour 2020  | -  | -  | alcohol intake<br>(n=NA)      | non-alcohol intake<br>(n=NA)       | 8·2±4·7 (6–13) months                                                                             | No  |
| 56 | Tan 2021         | -  | -  | alcohol consumption<br>(n=70) | non-alcohol consumption<br>(n=750) | NA                                                                                                | No  |
| 57 | Zhu 2021         | -  | -  | alcohol consumption<br>(n=58) | non-alcohol consumption<br>(n=306) | 1 year                                                                                            | Yes |
| 58 | Olson 2020b      | -  | -  | Alcohol abuse<br>(n=74)       | Non-alcohol abuse<br>(n=90)        | minimum of 1 year                                                                                 | No  |

Note: SD: standard deviation; NA: not available.

Two 17-year-old male non-smokers and a 16-year-old male non-smoker were included in Bone 1997 (study No.20). However, the information of each patient was clearly recorded in the table of the original article. Therefore, we excluded the data of these three patients. The data of Bone 1997 in the current basic characteristics table is the information of the remaining patients  $\geq 18$ .

## Appendix S6. Summary of 45 studies for the qualitative synthesis about the impacts of smoking and alcohol consumption

Summary of 45 studies for the qualitative synthesis about the impacts of smoking and alcohol consumption was described in Appendix S6a to d.

### S6a. Summary of 45 studies for the qualitative synthesis (part 1)

| No | First author/<br>Publication<br>year | Journal name                                                | country | Study design                  | Sex<br>M/F                                      | Age/yr<br>mean±SD (range)                                               | Race | BMI (kg/m <sup>2</sup> ) | Height<br>(cm) | Weight<br>(kg)                           |
|----|--------------------------------------|-------------------------------------------------------------|---------|-------------------------------|-------------------------------------------------|-------------------------------------------------------------------------|------|--------------------------|----------------|------------------------------------------|
| 1  | Arastu<br>2013[59]                   | International<br>Orthopaedics                               | England | case series                   | 22/9                                            | Mean 45·6 (24–64)                                                       | NA   | NA                       | NA             | NA                                       |
| 2  | Bhandari<br>2004[60]                 | Journal of Orthopaedic<br>Trauma                            | Canada  | case series                   | 17/13                                           | 51·6±15·2 (18–81)                                                       | NA   | NA                       | NA             | NA                                       |
| 3  | Sohn 2015[61]                        | Injury                                                      | Korea   | retrospective<br>cohort study | 30/3                                            | Mean 45·7 (18–70)                                                       | NA   | Mean 24·21               | NA             | NA                                       |
| 4  | Unlu 2015[62]                        | The Journal of Foot &<br>Ankle Surgery                      | Turkey  | case series                   | 12/8                                            | Mean 38 (18–71)                                                         | NA   | NA                       | NA             | NA                                       |
| 5  | Formica<br>2016[63]                  | Injury                                                      | Italy   | case series                   | 27/16                                           | Mean 44·8 (23–61)                                                       | NA   | Mean 26·7 (18·4–33·1)    | NA             | NA                                       |
| 6  | Frantz<br>2019[64]                   | Current Orthopaedic<br>Practice                             | USA     | retrospective<br>cohort study | 69/66                                           | Mean 40·7 (18–90)                                                       | NA   | Mean 29·8 (18·5–74·4)    | NA             | NA                                       |
| 7  | Pastides<br>2015[65]                 | The Journal of Foot &<br>Ankle Surgery                      | UK      | case series                   | 20/10                                           | Mean 39·64 (27–63)                                                      | NA   | NA                       | NA             | NA                                       |
| 8  | Burnett<br>2019[66]                  | Techniques in<br>Orthopaedics                               | USA     | retrospective<br>cohort study | 19/6                                            | 44·12±19·16 (18–84)                                                     | NA   | NA                       | NA             | NA                                       |
| 9  | Johnston<br>2014[67]                 | Hip International                                           | England | retrospective<br>cohort study | NA because data<br>included<br>hemiarthroplasty | NA because data included<br>hemiarthroplasty                            | NA   | NA                       | NA             | NA                                       |
| 10 | Nyquist<br>1997[68]                  | Alcohol & Alcoholism                                        | Sweden  | retrospective<br>cohort study | GA (49/0)<br>ConA (150/0)<br>Total (199/0)      | GA 44±10 (19–60)<br>ConA 37 ± 13 (18–60)<br>Total 38·72                 | NA   | NA                       | NA             | NA                                       |
| 11 | Tonnesen<br>1991[69]                 | The Journal of bone<br>and joint surgery.<br>British volume | Denmark | retrospective<br>cohort study | GA (90/0)<br>ConA (90/0)<br>Total (180/0)       | GA 46±1<br>ConA 45±2<br>Total 45·5                                      | NA   | NA                       | NA             | GA 81±2<br>ConA<br>80±1<br>Total<br>80·5 |
| 12 | Lin 2018[70]                         | The Journal of Foot &<br>Ankle Surgery                      | China   | retrospective<br>cohort study | 99/30                                           | Mean 38·57                                                              | NA   | NA                       | NA             | NA                                       |
| 13 | White<br>2010[71]                    | Journal of Orthopaedic<br>Trauma                            | Canada  | case series                   | NA                                              | Mean 44 (19–68)                                                         | NA   | NA                       | NA             | NA                                       |
| 14 | krishnan<br>2015[72]                 | Cranio-maxillofacial<br>Trauma and<br>Reconstruction        | India   | retrospective<br>cohort study | GS (15/0)<br>ConS (18/1)<br>GA (26/0)           | GS 36·8±9·6 (20–53)<br>ConS 32·74±8·89 (21–50)<br>GA 35·11±9·68 (20–53) | NA   | NA                       | NA             | NA                                       |

|    |                      |                                                       |             |                                                      |                                          |                                                                                |    |                                                                                          |    |    |
|----|----------------------|-------------------------------------------------------|-------------|------------------------------------------------------|------------------------------------------|--------------------------------------------------------------------------------|----|------------------------------------------------------------------------------------------|----|----|
|    |                      |                                                       |             |                                                      | ConA (7/1)<br>Total (33/1)               | ConA 32·63±8·23 (25–48)<br>Total 34·53±9·30 (20–53)                            |    |                                                                                          |    |    |
| 15 | Zura 2016[73]        | JAMA Surgery                                          | USA         | case-control study                                   | 130,378/178,952                          | 44·48±13·68 (18–63)                                                            | NA | NA                                                                                       | NA | NA |
| 16 | Gaal 2016[74]        | Journal of Oral and Maxillofacial Surgery             | USA         | retrospective cohort study                           | 441/69                                   | 29·3±11·4                                                                      | NA | 25·22±4·97                                                                               | NA | NA |
| 17 | Sun 2018[75]         | Medicine                                              | China       | case-control study                                   | 843/667                                  | Mean 47·9 (18–86)                                                              | NA | Mean 24·74                                                                               | NA | NA |
| 18 | Zura 2017[76]        | Bone                                                  | USA         | case-control study                                   | 15,211/41,281                            | Mean 74·85                                                                     | NA | NA                                                                                       | NA | NA |
| 19 | Boesmueller 2015[77] | Injury                                                | Australia   | case-control study                                   | 61/93                                    | 55·84±16·9 (19–91)                                                             | NA | NA                                                                                       | NA | NA |
| 20 | Cook 1977[78]        | Clinical Orthopaedics and Related Research            | US          | mixing of prospective and retrospective cohort study | 53/14                                    | Tibial shaft fracture<br>Mean 33·46                                            | NA | NA                                                                                       | NA | NA |
| 21 | Dailey 2018[79]      | Journal of Orthopaedic Trauma                         | UK          | case-control study                                   | 739/264                                  | NA                                                                             | NA | NA                                                                                       | NA | NA |
| 22 | Dingemans 2018[80]   | International Orthopaedics                            | Netherlands | prospective cohort study                             | 75/25                                    | Mean 43·10                                                                     | NA | (16·6–42)                                                                                | NA | NA |
| 23 | Femino 2010[81]      | The Iowa Orthopaedic Journal                          | US          | case series                                          | 12/1                                     | Mean 45·1 (26–71)                                                              | NA | NA                                                                                       | NA | NA |
| 24 | Giannoudis 2000[82]  | The Journal of bone and joint surgery. British volume | England     | case-control study                                   | NA because description of data was wrong | Mean 37·03 (18–85)                                                             | NA | NA                                                                                       | NA | NA |
| 25 | Moghaddam 2010[83]   | Injury                                                | Germany     | case-control study                                   | GS (10/4)<br>ConS (10/4)<br>Total (20/8) | GS 43·93±12·97 (23–62)<br>ConS 51·43±9·67 (41–75)<br>Total 47·68±11·86 (23–75) | NA | GS 25·54±2·51 (21·1–29·8)<br>ConS 25·11±1·69 (22·7–27·8)<br>Total 25·33±2·11 (21·1–29·8) | NA | NA |
| 26 | Rose 2007[84]        | Journal of Shoulder and Elbow Surgery                 | US          | case series                                          | 7/9                                      | Mean 51 (18–78)                                                                | NA | NA                                                                                       | NA | NA |
| 27 | Thompson 2017[85]    | The Journal of Foot & Ankle Surgery                   | US          | retrospective cohort study                           | 17/47                                    | Mean 49·16 (19–85)                                                             | NA | NA                                                                                       | NA | NA |
| 28 | Li 2015[86]          | Surgical Infection                                    | China       | case-control study                                   | 225/113                                  | Mean 37·2±8·4 (29–52)                                                          | NA | Mean 22·82                                                                               | NA | NA |
| 29 | Xu 2019[87]          | ANZ Journal of Surgery                                | China       | case-control study                                   | 273/161                                  | 49·6±16·5 (18–79)                                                              | NA | NA                                                                                       | NA | NA |
| 30 | Zhu 2017[88]         | International Wound Journal                           | China       | case-control study                                   | 164/71                                   | Mean 45·12 (19–75)                                                             | NA | NA                                                                                       | NA | NA |
| 31 | Fourgeaux 2019[89]   | International Orthopaedics                            | France      | case series                                          | 20/6                                     | 39±16 (21–90)                                                                  | NA | NA                                                                                       | NA | NA |
| 32 | Hoffmann 2019[90]    | Journal of Orthopaedic Surgery and Research           | Germany     | retrospective cohort study                           | 80/113                                   | Mean 70·2 (19–96)                                                              | NA | Mean 26·7 (15·6–54·7)                                                                    | NA | NA |

|    |                       |                                             |          |                            |          |                       |                                                                                                 |                     |    |    |
|----|-----------------------|---------------------------------------------|----------|----------------------------|----------|-----------------------|-------------------------------------------------------------------------------------------------|---------------------|----|----|
| 33 | Serrano 2020[91]      | Journal of Orthopaedic Trauma               | US       | case-control study         | 556/626  | Mean 48 (18–101)      | African American (197)<br>Caucasian (624)<br>Hispanic (81)<br>Other (40)<br>Not specified (239) | Mean 24 (16–44)     | NA | NA |
| 34 | Hu 2018[92]           | Foot & Ankle International                  | China    | case-control study         | 127/169  | 48·6±15·2 (20–84)     | NA                                                                                              | 27·3±4·3            | NA | NA |
| 35 | Alemdaroglu 2009[93]  | Injury                                      | Turkey   | case-control study         | NA       | Mean 45·3 (19–75)     | NA                                                                                              | NA                  | NA | NA |
| 36 | Grun 2020[94]         | Foot & Ankle International                  | Norway   | case series                | 23/2     | Mean 44 (21–72)       | NA                                                                                              | NA                  | NA | NA |
| 37 | Vander Voort 2020[95] | Iowa Orthop J                               | US       | case-control study         | 67/33    | 43·3±17·4 (18–90)     | NA                                                                                              | 30·2±6·9            | NA | NA |
| 38 | Baris 2020[96]        | Acta Orthopaedica et Traumatologica Turcica | Turkey   | retrospective cohort study | 41/19    | 45·3±14·9 (18–75)     | NA                                                                                              | NA                  | NA | NA |
| 39 | O'Halloran K 2016[97] | Clin Orthop Relat Res                       | US       | case-control study         | 289/93   | Mean 39·3 (18–85)     | White (232)<br>Nonwhite (150)                                                                   | NA                  | NA | NA |
| 40 | Naumann 2016[98]      | Foot and Ankle Surgery                      | Norway   | case-control study         | 245/322  | 53·2±15·1 (18·1–86·2) | NA                                                                                              | NA                  | NA | NA |
| 41 | Kawasaki 2021[99]     | Eur J Orthop Surg Traumatol                 | Japan    | case-control study         | 184/74   | Mean 45·8 (29–61)     | NA                                                                                              | 23·26               | NA | NA |
| 42 | Ahmed 2020[100]       | Medical Forum Monthly                       | Pakistan | case series                | 55/5     | 37·17±13·5            | NA                                                                                              | NA                  | NA | NA |
| 43 | Camm 2020[101]        | Acta Orthop. Belg                           | Belgium  | case series                | 187/246  | Mean 51 (18–91)       | NA                                                                                              | Mean 27 (16·8–53·1) | NA | NA |
| 44 | Halonon 2021[102]     | Injury                                      | Finland  | case-control study         | 315/680  | Mean 80·5 (29–104)    | NA                                                                                              | NA                  | NA | NA |
| 45 | Goudie 2021[103]      | The Journal of Bone and Joint Surgery       | UK       | case-control study         | 547/1683 | median 72, 73         | NA                                                                                              | NA                  | NA | NA |

Note: M: male; F: female; SD: standard deviation; BMI: body mass index; NA: not available; GS: smoking group; ConS: control group in smoking comparison

son; GA: alcohol drinking group; ConA: control group in alcohol drinking comparison.

**S6b. Summary of 45 studies for the qualitative synthesis (part 2)**

| No | First author/<br>Publication year | Inclusion and exclusion criteria                                                                                                                                                                                                                                                                                                                                                                                                                                                                                                                                                                                                                 | type of fracture (traumatic/non-pathological/non-metastatic fracture, etc) | Non-pathological fracture or unclear | Fracture location | Diabetes  | Use of NSAIDs | Use of fluoroquinolone family of antibiotics |
|----|-----------------------------------|--------------------------------------------------------------------------------------------------------------------------------------------------------------------------------------------------------------------------------------------------------------------------------------------------------------------------------------------------------------------------------------------------------------------------------------------------------------------------------------------------------------------------------------------------------------------------------------------------------------------------------------------------|----------------------------------------------------------------------------|--------------------------------------|-------------------|-----------|---------------|----------------------------------------------|
| 1  | Arastu 2013                       | <b>Inclusion criteria:</b><br>Between January 2000 and December 2012, 31 patients with displaced intra-articular calcaneal fractures not deemed suitable for an extensile lateral approach and internal fixation were identified. They were treated with MIRF by a single surgeon (senior author) in a Level 1 trauma centre.<br><b>Exclusion criteria:</b><br>Sanders type IV fractures                                                                                                                                                                                                                                                         | NA                                                                         | Unclear                              | Calcaneus         | Total (2) | NA            | NA                                           |
| 2  | Bhandari 2004                     | <b>Inclusion criteria:</b><br>1. age 18 years or older<br>2. isolated injury to the ankle<br>3. unstable ankle fracture (OTA 44B, Weber type B) requiring operative fixation<br>4. patient consent<br><b>Exclusion criteria:</b><br>1. patients with multiple fractures<br>2. patients who were deemed incapable of completing quality of life questionnaires because of factors such as cognitive impairment or inability to communicate in English.                                                                                                                                                                                            | NA                                                                         | Unclear                              | Ankle             | Total (2) | Total (2)     | NA                                           |
| 3  | Sohn 2015                         | <b>Inclusion criteria:</b><br>1. patients who are skeletally mature (age≥18 years)<br>2. patients with a displaced clavicular midshaft fracture (no cortical contact between medial and distal fragment and/or more than 2-cm shortening)<br>3. patients who were underwent operation with superior plating by either open plating with interfragmentary screw fixation or minimally invasive plate osteosynthesis (MIPO)<br>4. patients who were followed up during a minimum 1-year.<br><b>Exclusion criteria:</b><br>1. age more than 70 years.<br>2. fractures more than 3 weeks between the injury and the operation.<br>3. open fractures. | Non-pathological fracture                                                  | Non-pathological fracture            | Clavicle          | Total (4) | NA            | NA                                           |

|   |              |                                                                                                                                                                                                                                                                                                                                                                                                                                                                                                                                                                                                                                                                                                                                                                        |                           |                           |                  |           |    |    |
|---|--------------|------------------------------------------------------------------------------------------------------------------------------------------------------------------------------------------------------------------------------------------------------------------------------------------------------------------------------------------------------------------------------------------------------------------------------------------------------------------------------------------------------------------------------------------------------------------------------------------------------------------------------------------------------------------------------------------------------------------------------------------------------------------------|---------------------------|---------------------------|------------------|-----------|----|----|
|   |              | <p>4. pathologic fractures.<br/> 5. previous morbidity of the affected upper extremity, including shoulder girdle.<br/> 6. bilateral clavicle fractures at the initial trauma or previous fracture history of the contralateral clavicle.<br/> 7. presence of neurovascular compromise from the initial trauma.</p>                                                                                                                                                                                                                                                                                                                                                                                                                                                    |                           |                           |                  |           |    |    |
| 4 | Unlu 2015    | <p><b>Inclusion criteria:</b><br/> patients treated in our clinic from April 2009 to January 2011 for distal fibular and tibial fractures at the same level were included in the present study.<br/> <b>Exclusion criteria:</b><br/> 1. patients with grade III open fractures and multiple fragments at the medial distal tibia<br/> 2. patients with a medial malleolus fracture, patients who had undergone fixation with a low-profile medial distal tibial plate<br/> 3. patients with accompanying injuries.</p>                                                                                                                                                                                                                                                 | NA                        | Unclear                   | Fibula and tibia | Total (2) | NA | NA |
| 5 | Formica 2016 | <p><b>Inclusion criteria:</b><br/> Seventy-six consecutive patients affected by thoracolumbar fractures from January 2012 to December 2013 were included in the study. Indications for management with intermediate screws were:<br/> 1. fresh burst unstable fractures (AO-type A3, A4) or combined fractures with posterior ligamentous complex injuries (AO-type B2)<br/> 2. thoracolumbar fractures between T9 and L4<br/> 3. integrity of the pedicles at the fracture level allowing for the insertion of the bilateral intermediate screws.<br/> <b>Exclusion criteria:</b><br/> 1. stable thoracolumbar fracture (AO-type A1, A2)<br/> 2. vertebral injury pattern involving the pedicles<br/> 3. skeletal immaturity or osteoporotic vertebral fractures.</p> | NA                        | Unclear                   | Thoracolumbar    | Total (5) | NA | NA |
| 6 | Frantz 2019  | <p><b>Inclusion criteria:</b><br/> A single institution retrospective review of medical records was performed at a Level one academic trauma center on all patients undergoing operative fixation of diaphyseal humeral fractures (AO/OTA Classification – 12-A1 to 12-C3; current procedural terminology [CPT] code 24515) from 2006 to 2016 with plate osteosynthesis.<br/> 1. All fracture patterns of these subtypes were included.<br/> 2. Patients had to be older than 18 year of age<br/> 3. speak English as their primary language.<br/> <b>Exclusion criteria:</b><br/> 1. incomplete records, radiographs, or follow up</p>                                                                                                                                | Non-pathological fracture | Non-pathological fracture | Humerus          | NA        | NA | NA |

|    |               |                                                                                                                                                                                                                                                                                                                                                                                                                                                    |    |         |           |                                           |    |    |
|----|---------------|----------------------------------------------------------------------------------------------------------------------------------------------------------------------------------------------------------------------------------------------------------------------------------------------------------------------------------------------------------------------------------------------------------------------------------------------------|----|---------|-----------|-------------------------------------------|----|----|
|    |               | 2. patients with known inflammatory arthropathies, immunomodulating disorders, or metabolic bone disorders<br>3. pathologic fracture<br>4. revision surgical cases<br>5. concurrent injury in the same bone (i.e. undergoing simultaneous arthroplasty).                                                                                                                                                                                           |    |         |           |                                           |    |    |
| 7  | Pastides 2015 | <b>Inclusion criteria:</b><br>All closed displaced calcaneal fractures were considered for surgery and classified according to the Sanders classification on the preoperative computed tomography (CT) scans.<br><b>Exclusion criteria:</b><br>1. Open fractures were excluded<br>2. Types 1 and 4                                                                                                                                                 | NA | Unclear | Calcaneus | NA                                        | NA | NA |
| 8  | Burnett 2019  | <b>Inclusion criteria:</b><br>1. patients who were skeletally mature, below 85 years of age<br>2. adequate follow-up to fracture healing<br><b>Exclusion criteria:</b><br>patients who had nontongue type intra-articular fractures.                                                                                                                                                                                                               | NA | Unclear | Calcaneus | NA                                        | NA | NA |
| 9  | Johnston 2014 | <b>Inclusion criteria:</b><br>The data for 7,023 hip fracture patients was collected on admission to a district general hospital. Questionnaires were completed by the admitting doctor from the history given by the patient and carers. Medical history was obtained from the patients and confirmed with their medical notes.<br><b>Exclusion criteria:</b> NA                                                                                  | NA | Unclear | hip       | NA because data included hemiarthroplasty | NA | NA |
| 10 | Nyquist 1997  | <b>Inclusion criteria:</b><br>From 1980 to 1990, a total of 218 male patients between 18 and 60 years of age were treated at Malmd University Hospital because of isolated tibial shaft fractures. Malmo University Hospital is the only hospital providing medical care to the city residents.<br><b>Exclusion criteria:</b><br>1. primary amputation<br>2. lethal complications<br>3. incomplete or missing records or final treatment elsewhere | NA | Unclear | Tibia     | NA                                        | NA | NA |
| 11 | Tonnesen 1991 | <b>Inclusion criteria:</b><br>Between 1977 and 1988, 626 men with closed ankle fractures were admitted for open reduction and fixation<br><b>Exclusion criteria:</b> NA                                                                                                                                                                                                                                                                            | NA | Unclear | ankle     | GA (2)<br>ConA (2)<br>Total (4)           | NA | NA |
| 12 | Lin 2018      | <b>Inclusion criteria:</b><br>The present retrospective study included 129 calcaneal fracture patients who had undergone open reduction and internal fixation in our hospital from January 2008 to                                                                                                                                                                                                                                                 | NA | Unclear | calcaneus | Total (0)                                 | NA | NA |

|    |               |                                                                                                                                                                                                                                                                                                                                                                                                                                                                                  |    |         |          |                |                |    |
|----|---------------|----------------------------------------------------------------------------------------------------------------------------------------------------------------------------------------------------------------------------------------------------------------------------------------------------------------------------------------------------------------------------------------------------------------------------------------------------------------------------------|----|---------|----------|----------------|----------------|----|
|    |               | December 2010.<br><b>Exclusion criteria:</b><br>1. concurrent fractures that might cause postoperative chronic pain such as tibial, fibula, metatarsal, and phalangeal fractures<br>2. preexisting calcaneal pain<br>3. concurrent peripheral nerve injury, including diabetic foot disease and tarsal tunnel syndrome<br>4. concurrent systemic diseases, such as hypertension, coronary atherosclerotic heart disease<br>5. diabetes.                                          |    |         |          |                |                |    |
| 13 | White 2010    | <b>Inclusion criteria:</b><br>patients who had sustained OTA 43.C-type injuries treated by early ORIF with a minimum 1-year follow up.<br><b>Exclusion criteria:</b><br>1. patients who could not complete follow up<br>2. patients in whom primary treatment could not be performed<br>3. patients who died within 30 days of admission from associated injuries<br>4. patients who were transferred out of the catchment area<br>5. patients who failed to attend follow up.   | NA | Unclear | Tibia    | Total (6)      | NA             | NA |
| 14 | krishnan 2015 | <b>Inclusion criteria:</b><br>All adult patients who reported to the department of dentistry in a public sector, tertiary care hospital and level 1 trauma center, with fractures of the dentate portion of the mandible over a 3-year period (January 2011–January 2014), were assessed for inclusion in the study<br><b>Exclusion criteria:</b> NA                                                                                                                             | NA | Unclear | Mandible | NA             | NA             | NA |
| 15 | Zura 2016     | <b>Inclusion criteria:</b><br>patients with a coded bone fracture in calendar year 2011.<br><b>Exclusion criteria:</b><br>Patients who had less than 12 months of continuous enrollment following fracture so as to capture all coded nonunions.                                                                                                                                                                                                                                 | NA | Unclear | 18 bones | Total (26,875) | Total (23,847) | NA |
| 16 | Gaal 2016     | <b>Inclusion criteria:</b><br>1. subjects must have been >18 years of age<br>2. patients who have had isolated open mandible fractures operatively managed using a transoral approach (surgery performed only through the mouth). Procedures performed included ORIF of one or multiple sites with or closed reduction and intermaxillary fixation (CR-IMF) using any form of IMF technique.<br><b>Exclusion criteria:</b><br>1. Subjects who presented with any other fractures | NA | Unclear | Mandible | Total (21)     | NA             | NA |



|    |                  |                                                                                                                                                                                                                                                                                                                                                                                                                                                                                                                                                                                                                                                                                                                                       |                                             |                           |          |                |    |    |
|----|------------------|---------------------------------------------------------------------------------------------------------------------------------------------------------------------------------------------------------------------------------------------------------------------------------------------------------------------------------------------------------------------------------------------------------------------------------------------------------------------------------------------------------------------------------------------------------------------------------------------------------------------------------------------------------------------------------------------------------------------------------------|---------------------------------------------|---------------------------|----------|----------------|----|----|
|    |                  | <ul style="list-style-type: none"> <li>2. complex mandibular fractures (e.g. requiring transcervical approach)</li> <li>3. gunshot wounds</li> <li>4. pre-existing concurrent mandibular fractures (e.g. new fractures during the healing of a previous fracture)</li> <li>5. fracture site infections present at the time of initial presentation</li> <li>6. closed mandibular fractures</li> <li>7. immunocompromised status (e.g. human immunodeficiency virus [HIV], any immunosuppressive medication such as steroids)</li> <li>8. patients who received antibiotics for any other indication.</li> </ul>                                                                                                                       |                                             |                           |          |                |    |    |
| 17 | Sun 2018         | <p><b>Inclusion criteria:</b><br/>The electronic medical records (EMRs) were searched to identify all adult patients (18 years and older) who had undergone ORIF to treat ankle fracture in the period from January 2015 to December 2016.</p> <p><b>Exclusion criteria:</b></p> <ul style="list-style-type: none"> <li>1. patient age &lt; 18 years</li> <li>2. pathological fractures</li> <li>3. old fractures (&gt;21 days after initial injury)</li> <li>4. treatments rather than ORIF (external fixation, conservative treatments, manual reduction and internal fixation, traction).</li> </ul>                                                                                                                               | Non-pathological fracture, non-old fracture | Non-pathological fracture | Ankle    | Total (104)    | NA | NA |
| 18 | Zura 2017        | <p><b>Inclusion criteria:</b><br/>We analysed all Medicare beneficiaries with <math>\geq 1</math> fracture diagnosis in the 18 bones most frequently fractured.</p> <p><b>Exclusion criteria:</b></p> <ul style="list-style-type: none"> <li>1. patients who did not have both Medicare Part A and Part B eligibility in all of 2011 and 2012, so that a code for nonunion could be captured.</li> <li>2. a malunion claimor if the 2011 claim was for nonunion of a prior fracture.</li> </ul>                                                                                                                                                                                                                                       | NA                                          | Unclear                   | 18 bones | Total (21,600) | NA | NA |
| 19 | Boesmueller 2015 | <p><b>Inclusion criteria:</b></p> <ul style="list-style-type: none"> <li>1. presence of proximal humeral fracture</li> <li>2. known time of trauma</li> <li>3. surgical treatment with ORIF and Philos plate (Synthes, Oberdorf, Switzerland)</li> <li>4. availability of at least 6 months of radiological follow-up after surgery</li> <li>5. a complete data set.</li> </ul> <p><b>Exclusion criteria:</b></p> <ul style="list-style-type: none"> <li>1. patients undergoing conservative treatment</li> <li>2. patients presenting with pathologic or open fractures</li> <li>3. patients with implantation of a primary fracture prosthesis</li> <li>4. patients with a previous injury or surgery on the ipsilateral</li> </ul> | Non-pathological fracture                   | Non-pathological fracture | Humerus  | NA             | NA | NA |

|    |             |                                                                                                                                                                                                                                                                                                                                                                                                                                                                                                                                                                                                                                                                                                                                                                                                                                                                                                                                                                                                                                                                                                                                                                                                                                                                                                                                                                                                                                                                                                                                                                                                                                                                                                                                                                                     |                           |                           |       |    |                           |    |
|----|-------------|-------------------------------------------------------------------------------------------------------------------------------------------------------------------------------------------------------------------------------------------------------------------------------------------------------------------------------------------------------------------------------------------------------------------------------------------------------------------------------------------------------------------------------------------------------------------------------------------------------------------------------------------------------------------------------------------------------------------------------------------------------------------------------------------------------------------------------------------------------------------------------------------------------------------------------------------------------------------------------------------------------------------------------------------------------------------------------------------------------------------------------------------------------------------------------------------------------------------------------------------------------------------------------------------------------------------------------------------------------------------------------------------------------------------------------------------------------------------------------------------------------------------------------------------------------------------------------------------------------------------------------------------------------------------------------------------------------------------------------------------------------------------------------------|---------------------------|---------------------------|-------|----|---------------------------|----|
|    |             | shoulder<br>5. patients with an incomplete data set<br>6. patients with a follow-up of <6 months<br>7. patients under 18 years of age                                                                                                                                                                                                                                                                                                                                                                                                                                                                                                                                                                                                                                                                                                                                                                                                                                                                                                                                                                                                                                                                                                                                                                                                                                                                                                                                                                                                                                                                                                                                                                                                                                               |                           |                           |       |    |                           |    |
| 20 | Cook 1977   | <p><b>Inclusion criteria:</b><br/>         Skeletally mature men and nonpregnant women who had a closed or Grade I open tibial diaphyseal fracture that was primarily transverse, short oblique, or short spiral and that could be treated effectively with closed reduction and immobilization in a cast were eligible for inclusion in the study.</p> <p><b>Exclusion criteria:</b><br/>         1. patients in whom either the prereluction or postreduction anteroposterior (AP) or the lateral radiographs showed that the length of the fracture line was more than twice the diameter of the diaphyseal shaft (a long spiral or long oblique fracture), the postreduction displacement was more than 50% of the width of the shaft, or the postreduction fracture gap averaged more than 0.5 cm.<br/>         2. open fractures, except Grade I as defined by Gustilo and Andersonx; fractures of the tibial metaphysis; fractures with persistent shortening of more than 1 cm after reduction<br/>         3. fractures that were not sufficiently stable for treatment with immobilization in an above the knee cast<br/>         4. fractures with a large butterfly fragment (larger than 2 times the diameter of the tibial shaft)<br/>         5. pathologic fractures<br/>         6. comminuted fractures (comminution with fragments of less than 1 cm in length was acceptable)<br/>         7. patients who were receiving steroids, anticoagulants, prescription nonsteroidal anti-inflammatory medication, calcium channel blockers, or diphosphonate therapy<br/>         8. patients who had a history of thrombophlebitis or vascular insufficiency<br/>         9. patients who had a recent history of alcoholism or nutritional deficiency, or both.</p> | Non-pathological fracture | Non-pathological fracture | Tibia | NA | Tibial fracture Total (0) | NA |
| 21 | Dailey 2018 | <p><b>Inclusion criteria:</b><br/>         1. Records for 2,211 tibial fracture patients treated during the study period were filtered for inclusion<br/>         2. Adult patients (age 18+)<br/>         3. Primary IM nailing case</p> <p><b>Exclusion criteria:</b><br/>         1. Casts<br/>         2. All other implants, including secondary nailing after failed</p>                                                                                                                                                                                                                                                                                                                                                                                                                                                                                                                                                                                                                                                                                                                                                                                                                                                                                                                                                                                                                                                                                                                                                                                                                                                                                                                                                                                                      | Non-pathological fracture | Non-pathological fracture | Tibia | NA | NA                        | NA |

|    |                    |                                                                                                                                                                                                                                                                                                                                                                                                                                                                                                                                                                                                                                                                                                                                                                   |                         |                           |                 |           |                                           |    |
|----|--------------------|-------------------------------------------------------------------------------------------------------------------------------------------------------------------------------------------------------------------------------------------------------------------------------------------------------------------------------------------------------------------------------------------------------------------------------------------------------------------------------------------------------------------------------------------------------------------------------------------------------------------------------------------------------------------------------------------------------------------------------------------------------------------|-------------------------|---------------------------|-----------------|-----------|-------------------------------------------|----|
|    |                    | cast or exfix<br>3. patients who died as a result of injury or before union<br>4. patients who were lost to follow up<br>5. Followed-up elsewhere<br>6. Amputation undertaken<br>7. Pathological fracture                                                                                                                                                                                                                                                                                                                                                                                                                                                                                                                                                         |                         |                           |                 |           |                                           |    |
| 22 | Dingemans<br>2018  | <b>Inclusion criteria:</b><br>This study was a pilot study to investigate the feasibility of using a new, portable, negative pressure wound therapy device in patients undergoing lower extremity fracture surgery. The 3-cm threshold for inclusion was chosen to selectively include patients in whom open surgery and not percutaneous surgery was performed.<br><b>Exclusion criteria:</b><br>1. open fractures or active infections<br>2. antibiotic treatment at the time of the operation for a concomitant disease or infection<br>3. patients with immune deficiencies<br>4. incision location not suitable for negative pressure wound therapy device,<br>5. inability to adhere to therapy,<br>6. incomprehensive understanding of the Dutch language. | NA                      | Unclear                   | Lower extremity | Total (0) | NA                                        | NA |
| 23 | Femino 2010        | <b>Inclusion criteria:</b><br>We retrospectively reviewed thirteen patients who had undergone open reduction and lateral plate fixation without bone graft of closed displaced intraarticular calcaneus fractures using an extensile sinus tarsi approach<br><b>Exclusion criteria:</b> NA                                                                                                                                                                                                                                                                                                                                                                                                                                                                        | NA                      | Unclear                   | Calcaneus       | Total (1) | NA                                        | NA |
| 24 | Giannoudis<br>2000 | <b>Inclusion criteria:</b><br>We reviewed retrospectively the record of 377 patients treated by intramedullary nailing for fractures of the shaft of the femur (AO 32) between 1991 and 1997 to identify those with nonunion.<br><b>Exclusion criteria:</b><br>Patients with head injuries                                                                                                                                                                                                                                                                                                                                                                                                                                                                        | NA                      | Unclear                   | Femur           | NA        | postoperative use of NSAIDs<br>Total (29) | NA |
| 25 | Moghaddam<br>2010  | <b>Inclusion criteria:</b><br>1. radiological evidence of a long bone fracture<br>2. an age of 18–80 years<br>3. informed and written consent prior to the study<br><b>Exclusion criteria:</b><br>1. multiple traumas (i.e., more than two fractures)<br>2. significant soft tissue damage<br>3. type II or III open fractures (according to the Gustilo classification), and/or postoperative respirator ventilation that was utilised for more than 24h                                                                                                                                                                                                                                                                                                         | Non-metastatic fracture | Non-pathological fracture | Long bone       | NA        | Total (0)                                 | NA |

|    |               |                                                                                                                                                                                                                                                                                                                                                                                                                                                                                                                                |                                                    |                           |            |            |    |    |
|----|---------------|--------------------------------------------------------------------------------------------------------------------------------------------------------------------------------------------------------------------------------------------------------------------------------------------------------------------------------------------------------------------------------------------------------------------------------------------------------------------------------------------------------------------------------|----------------------------------------------------|---------------------------|------------|------------|----|----|
|    |               | <p>4. Because serum levels of TGF-<math>\beta</math>1 can be influenced by various drugs and systemic disorders, patients suffering from systemic or organic diseases, acute or chronic inflammatory diseases as monitored by routine lab programs, malignancy, or obesity</p> <p>5. patients with a history of thiazide use</p> <p>6. immunosuppressive</p> <p>7. long-term therapy with steroidal or non-steroidal anti-inflammatory drugs, estrogens, anabolic steroids, calcium, fluoride, or calcitropic hormones</p>     |                                                    |                           |            |            |    |    |
| 26 | Rose 2007     | <p><b>Inclusion criteria:</b><br/>The Synthes LCP Locking Proximal Humerus Plate (Synthes, Paoli, PA) was used for the treatment of proximal humeral fractures in 16 patients. All patients underwent open reduction–internal fixation of their injuries via a deltopectoral approach while positioned in the beachchair position under general anesthesia.</p> <p><b>Exclusion criteria:</b> NA</p>                                                                                                                           | NA                                                 | Unclear                   | Humerus    | NA         | NA | NA |
| 27 | Thompson 2017 | <p><b>Inclusion criteria:</b><br/>1. patients with surgically managed fifth metatarsal diaphyseal fractures.<br/>2. Diaphyseal fractures were chosen for surgical management according to the amount of displacement, shortening, and rotation of the distal fragment.</p> <p><b>Exclusion criteria:</b><br/>1. patients with non-diaphyseal fifth metatarsal fractures<br/>2. conservatively managed fractures<br/>3. follow-up &lt;1 year<br/>4. missing radiographic images<br/>5. surgery performed by another surgeon</p> | NA                                                 | Unclear                   | Metatarsal | Total (9)  | NA | NA |
| 28 | Li 2015       | <p><b>Inclusion criteria:</b><br/>All patients who underwent operative acetabular fracture treatment between June 2001 and June 2011 were included in the retrospective study.</p> <p><b>Exclusion criteria:</b> NA</p>                                                                                                                                                                                                                                                                                                        | NA                                                 | Unclear                   | Pelvis     | Total (18) | NA | NA |
| 29 | Xu 2019       | <p><b>Inclusion criteria:</b><br/>Between July 2014 and December 2017, patients above 18 years old who had a distal femur intra-articular fracture surgically treated by open plates/screws were included. The minimal post-operative follow-up period was 1 year, based on the postoperative follow-up strategies in our institution.</p> <p><b>Exclusion criteria:</b><br/>1. patients younger than 18 years<br/>2. extra-articular femur fractures</p>                                                                      | Non-pathological fracture, non-metastatic fracture | Non-pathological fracture | Femur      | NA         | NA | NA |

|    |               |                                                                                                                                                                                                                                                                                                                                                                                                                                                                                                                            |                                                        |                           |           |             |    |    |
|----|---------------|----------------------------------------------------------------------------------------------------------------------------------------------------------------------------------------------------------------------------------------------------------------------------------------------------------------------------------------------------------------------------------------------------------------------------------------------------------------------------------------------------------------------------|--------------------------------------------------------|---------------------------|-----------|-------------|----|----|
|    |               | 3. old fractures (>28 days from fracture occurrence)<br>4. pathological or metastasis fractures<br>5. treatment by alternative methods of fracture stabilization other than open plate/screws osteosynthesis<br>6. patients admitted only for treatment of SSI but without undergoing index surgery at our institution.                                                                                                                                                                                                    |                                                        |                           |           |             |    |    |
| 30 | Zhu 2017      | <b>Inclusion criteria:</b><br>All patients aged 18 or older with acute tibial plateau fractures treated by ORIF<br><b>Exclusion criteria:</b><br>1. patients younger than 18 years<br>2. pathological fractures<br>3. old fractures (>21 days from initial injury) and reoperation for certain reasons.                                                                                                                                                                                                                    | Non-pathological fracture                              | Non-pathological fracture | Tibia     | Total (11)  | NA | NA |
| 31 | Fourgeaux2019 | <b>Inclusion criteria:</b><br>calcaneal fractures with the presence of a displaced intra-articular calcaneal fracture with loss of congruence of the subtalar joint.<br><b>Exclusion criteria:</b><br>1. patients with a follow-up period shorter than two years,<br>2. patients with open fracture or undisplaced fracture                                                                                                                                                                                                | NA                                                     | Unclear                   | Calcaneal | NA          | NA | NA |
| 32 | Hoffmann 2019 | <b>Inclusion criteria:</b><br>intertrochanteric femur fracture with long intramedullary nail (IMN) fixation and age equal to or older than 18 years.<br><b>Exclusion criteria:</b><br>1. intramedullary fixation with a short nail or utilization of an extramedullary implant<br>2. follow up less than 6months<br>3. metastatic disease<br>4. insufficient medical record or radiographic data.                                                                                                                          | non-metastatic fracture                                | Non-pathological fracture | Femur     | Total (40)  | NA | NA |
| 33 | Serrano 2020  | <b>Inclusion criteria:</b><br>Patients with a humeral shaft fracture managed conservatively with a functional brace from 2005 to 2016 were retrospectively reviewed from 9 academic institutions across the United States.<br><b>Exclusion criteria:</b><br>1. Pathologic and periprosthetic fractures<br>2. diaphyseal injuries with joint extension<br>3. ipsilateral upper extremity injuries<br>4. Patients younger than 18 years<br>5. patients lost to follow-up before union or before change in treatment modality | Non-pathological fracture, non-periprosthetic fracture | Non-pathological fracture | Humerus   | Total (180) | NA | NA |

|    |                   |                                                                                                                                                                                                                                                                                                                                                                                                                                                                                                                                                                                                                                                                                                                                                                                                                                                                                                                                                                                            |    |         |              |            |    |    |
|----|-------------------|--------------------------------------------------------------------------------------------------------------------------------------------------------------------------------------------------------------------------------------------------------------------------------------------------------------------------------------------------------------------------------------------------------------------------------------------------------------------------------------------------------------------------------------------------------------------------------------------------------------------------------------------------------------------------------------------------------------------------------------------------------------------------------------------------------------------------------------------------------------------------------------------------------------------------------------------------------------------------------------------|----|---------|--------------|------------|----|----|
| 34 | Hu J 2018         | <p><b>Inclusion criteria:</b></p> <ol style="list-style-type: none"> <li>1. patients with a definitive diagnosis of a medial malleolar fracture based on clinical and imaging findings</li> <li>2. patients who underwent ORIF surgery or percutaneous screw fixation</li> <li>3. patients who were skeletally mature at the time of the injury</li> <li>4. patients who had complete clinical follow up data for at least 12 months after the injury.</li> </ol> <p><b>Exclusion criteria:</b></p> <ol style="list-style-type: none"> <li>1. patients who had removal of the internal fixation device before fracture union due to complications, such as an infection or a wound healing disorder</li> <li>2. patients who had significant complications related to lateral or posterior fractures, such as malreduction, redisplacement, delayed union, or nonunion</li> <li>3. patients with incomplete information and/or with a shorter follow-up of less than 12 months.</li> </ol> | NA | Unclear | Ankle        | Total (46) | NA | NA |
| 35 | Alemdaroglu 2009  | <p><b>Inclusion criteria:</b></p> <p>Adult patients suffering from tibial shaft fractures who were treated with circular external fixator between October 2002 and May 2007 were included in the study. These patients were treated with circular external fixator due to consensus in the department.</p> <p><b>Exclusion criteria:</b></p> <ol style="list-style-type: none"> <li>1. Patients with articular extension</li> <li>2. patients who were lost to follow up</li> </ol>                                                                                                                                                                                                                                                                                                                                                                                                                                                                                                        | NA | Unclear | Tibia        | Total (1)  | NA | NA |
| 36 | Grun 2020         | <p><b>Inclusion criteria:</b></p> <ol style="list-style-type: none"> <li>1. Closed, dislocated intra-articular calcaneal fracture treated with only percutaneous reduction and fixation and assisted by subtalar arthroscopy between 2013 and September 2018</li> <li>2. Age 18 years or older at the time of injury</li> <li>3. Availability for follow-up</li> </ol> <p><b>Exclusion criteria:</b></p> <ol style="list-style-type: none"> <li>1. patients who had moved abroad and therefore were unavailable for follow-up</li> <li>2. patients who could not participate due to other relevant illness (eg, dementia)</li> </ol>                                                                                                                                                                                                                                                                                                                                                       | NA | Unclear | Calcaneal    | Total (1)  | NA | NA |
| 37 | Vander Voort 2020 | <p><b>Inclusion criteria:</b></p> <p>Surgical records were queried at a level I academic trauma center to identify individuals 18 years and older indicated for operative fixation of traumatic open fractures of the tibia and ankle between June 2006 and September 2017.</p> <p><b>Exclusion criteria:</b></p> <ol style="list-style-type: none"> <li>1. Patients without preoperative computed tomography (CT) scan including the lumbar spine as part of their trauma work</li> </ol>                                                                                                                                                                                                                                                                                                                                                                                                                                                                                                 | NA | Unclear | Tibia, ankle | NA         | NA | NA |

|    |                   |                                                                                                                                                                                                                                                                                                                                                                                                                                                                                                                                                                                                                                                                                                                                                                                                                                                                                                                                                                                                                                                                                         |                           |                           |       |            |            |    |
|----|-------------------|-----------------------------------------------------------------------------------------------------------------------------------------------------------------------------------------------------------------------------------------------------------------------------------------------------------------------------------------------------------------------------------------------------------------------------------------------------------------------------------------------------------------------------------------------------------------------------------------------------------------------------------------------------------------------------------------------------------------------------------------------------------------------------------------------------------------------------------------------------------------------------------------------------------------------------------------------------------------------------------------------------------------------------------------------------------------------------------------|---------------------------|---------------------------|-------|------------|------------|----|
|    |                   | up<br>2. patients who were lost to follow-up                                                                                                                                                                                                                                                                                                                                                                                                                                                                                                                                                                                                                                                                                                                                                                                                                                                                                                                                                                                                                                            |                           |                           |       |            |            |    |
| 38 | Baris 2020        | <p><b>Inclusion criteria:</b><br/>From January 2011 to November 2015, we reviewed 60 patients (62 tibia) who were treated with open reduction and internal fixation for distal tibia pilon fractures who could be postoperatively followed for three years or more.</p> <p><b>Exclusion criteria:</b><br/>1. multiple fractures<br/>2. previous foot or ankle surgery<br/>3. accompanying neural or vascular pathology<br/>4. neuropathic foot<br/>5. pathologic fractures of the tibia<br/>6. patients younger than 18 years<br/>7. the loss in the follow-up.</p>                                                                                                                                                                                                                                                                                                                                                                                                                                                                                                                     | Non-pathological fracture | Non-pathological fracture | Tibia | Total (5)  | NA         | NA |
| 39 | O'Halloran K 2016 | <p><b>Inclusion criteria:</b><br/>1. patients aged 18 years and older<br/>2. tibial shaft fractures treated at authors' center from 2007 to 2014</p> <p><b>Exclusion criteria:</b><br/>1. patients with adequate follow-up but indeterminate healing status<br/>2. patients who were treated with anything other than reamed IM nail fixation<br/>3. patients who had a tibiototalcaneal nail<br/>4. patients who died before healing or nonunion<br/>5. patients who had undergone early amputations<br/>6. patients who had periprosthetic, stress, or pathologic fractures<br/>7. patients who had definitive fixation performed at a different hospital<br/>8. patients who had fractures involving the tibial plafond or knee joints that required operative intervention separate from the IM nail<br/>9. pregnant patients, patients with insufficient cortical contact, patients with missing chart data, and nonoperative patients<br/>10. patients with nonunion surgery planned before 3 months and those for whom the possibility of nonunion was noted before 3 months</p> | Non-pathological fracture | Non-pathological fracture | Tibia | Total (23) | Total (47) | NA |
| 40 | Naumann 2016      | <p><b>Inclusion criteria:</b><br/>all patients <math>\geq 18</math> years of age living in the catchment area who were treated for unstable and closed ankle fractures by ORIF between January 1, 2009 and December 31, 2011 were eligible</p>                                                                                                                                                                                                                                                                                                                                                                                                                                                                                                                                                                                                                                                                                                                                                                                                                                          | NA                        | Unclear                   | Ankle | Total (34) | NA         | NA |

|    |               |                                                                                                                                                                                                                                                                                                                                                                                                                                       |                           |                           |         |             |    |    |
|----|---------------|---------------------------------------------------------------------------------------------------------------------------------------------------------------------------------------------------------------------------------------------------------------------------------------------------------------------------------------------------------------------------------------------------------------------------------------|---------------------------|---------------------------|---------|-------------|----|----|
|    |               | for inclusion in the study.<br><b>Exclusion criteria:</b><br>1. high energy trauma<br>2. polytrauma<br>3. other type of fracture in the limb<br>4. not from region AHUS or SOF<br>5. apoplexia/intoxication<br>6. fracture not in year 2009–2011<br>7. conservative treatment<br>8. previous fracture in the limb<br>9. open fracture<br>10. cognitive disease<br>11. patients who died<br>12. patients who moved out of area         |                           |                           |         |             |    |    |
| 41 | Kawasaki 2021 | <b>Inclusion criteria:</b><br>patients with tibial shaft fractures who were treated with intramedullary nail at our 12 facilities<br><b>Exclusion criteria:</b><br>1. patients who lost to follow-up 12 months after the operation<br>2. patients with missing data or inadequate radiographs                                                                                                                                         | NA                        | Unclear                   | Tibia   | NA          | NA | NA |
| 42 | Ahmed 2020    | <b>Inclusion criteria:</b><br>patients presenting to us with Gustilo-Anderson I, II, IIIAOTFs                                                                                                                                                                                                                                                                                                                                         | NA                        | Unclear                   | Tibia   | NA          | NA | NA |
| 43 | Cammas 2020   | <b>Inclusion criteria:</b><br>1. Patients treated surgically for ankle malleolus fracture from 2013 to 2017<br>2. All patients were over 18 years old<br><b>Exclusion criteria:</b><br>1. Patients with missing data or with pilon fractures and metaphyseal and/ or diaphyseal tibial fractures<br>2. Patients with history of bone and ankle joint infection, previous ankle fracture and those suffering from ankle osteoarthritis | NA                        | Unclear                   | Ankle   | Total (30)  | NA | NA |
| 44 | Halonon 2021  | <b>Inclusion criteria:</b><br>ICD-10 diagnoses coded as trochanteric fracture (S72.1) and with a procedure code for intramedullary fixation of proximal femoral fracture (NFJ54) by Nordic Classification of Surgical Procedures (NCSP)                                                                                                                                                                                               | NA                        | Unclear                   | Hip     | Total (168) | NA | NA |
| 45 | Goudie 2021   | <b>Inclusion criteria:</b><br>1. Isolated, non-pathologic fracture through the humeral neck located within the epimetaphyseal region defined by the method of squares<br>2. locally resident<br>3. presentation within 2 weeks of injury                                                                                                                                                                                              | Non-pathological fracture | Non-pathological fracture | Humerus | NA          | NA | NA |



|  |                                                                                                                                                                                                                                                                                                                                                                                                                                                                                                                                                                                                             |  |  |  |  |  |  |
|--|-------------------------------------------------------------------------------------------------------------------------------------------------------------------------------------------------------------------------------------------------------------------------------------------------------------------------------------------------------------------------------------------------------------------------------------------------------------------------------------------------------------------------------------------------------------------------------------------------------------|--|--|--|--|--|--|
|  | <p>4. no preexisting shoulder degenerative condition or previous surgery to the shoulder</p> <p><b>Exclusion criteria:</b></p> <p>1. Missing &gt;3 of the 10 demographic data points studied</p> <p>2. Double entry due to metachronous injury to contralateral shoulder</p> <p>3. Inadequate follow-up until union status determined or loss to follow-up</p> <p>4. Died before union status could be assessed</p> <p>5. Primary operative treatment (Surgeon decision, Patient preference for operative treatment, Skin compromise, Neurovascular compromise, Fracture extending to diaphysis, Other)</p> |  |  |  |  |  |  |
|--|-------------------------------------------------------------------------------------------------------------------------------------------------------------------------------------------------------------------------------------------------------------------------------------------------------------------------------------------------------------------------------------------------------------------------------------------------------------------------------------------------------------------------------------------------------------------------------------------------------------|--|--|--|--|--|--|

Note: NSAIDs: non-steroidal anti-inflammatory drugs; NA: not available; GA: alcohol drinking group; ConA: control group in alcohol drinking comparison; OR IF: open reduction and internal fixation.

### S6c. Summary of 45 studies for the qualitative synthesis (part 3)

| No | First author/<br>Publication<br>year | Treatment                                                                                                                      | smoking type | smoking dose              | Smoking group             | Smoking Control group         |
|----|--------------------------------------|--------------------------------------------------------------------------------------------------------------------------------|--------------|---------------------------|---------------------------|-------------------------------|
| 1  | Arastu 2013                          | minimally invasive reduction and fixation                                                                                      | NA           | NA                        | Smokers<br>(n=24)         | Non-smokers<br>(n=7)          |
| 2  | Bhandari 2004                        | fixed with a lateral one-third semi-tubular plate                                                                              | cigarette    | 31±25·9 (2–99) pack years | Smoking history<br>(n=14) | Non-smoking history<br>(n=16) |
| 3  | Sohn 2015                            | superior plating by either open plating with interfragmentary screw fixation or minimally invasive plate osteosynthesis (MIPO) | NA           | NA                        | Current smokers<br>(n=13) | Non-current smokers<br>(n=20) |
| 4  | Unlu 2015                            | Minimally invasive plate osteosynthesis after fixing with a plate                                                              | NA           | NA                        | Smoking history<br>(n=3)  | Non-smoking history<br>(n=17) |
| 5  | Formica 2016                         | short-segment instrumentation with bilateral intermediate screws at the fracture level                                         | NA           | NA                        | Tobacco use<br>(n=18)     | Non-tobacco use<br>(n=25)     |
| 6  | Frantz 2019                          | operative fixation with plate osteosynthesis.                                                                                  | NA           | NA                        | Smokers<br>(n=36)         | Non-smokers<br>(n=60)         |
| 7  | Pastides 2015                        | treated using arthroscopic reduction and percutaneous fixation: percutaneous arthroscopic calcaneal osteosynthesis (PACO)      | cigarette    | NA                        | Smokers<br>(n=11)         | Non-smokers<br>(n=8)          |
| 8  | Burnett 2019                         | cast immobilization<br>open reduction and fixation with plate fixation<br>closed reduction and percutaneous screw fixation     | NA           | NA                        | Smokers<br>(n=NA)         | Non-smokers<br>(n=NA)         |
| 9  | Johnston 2014                        | 1. Intracapsular fractures treated by internal fixation<br>2. Extracapsular internal fixation                                  | -            | -                         | -                         | -                             |
| 10 | Nyquist 1997                         | 1. dosed reduction and trans-fixational plaster                                                                                | -            | -                         | -                         | -                             |

|    |                  |                                                                                                                                                                                                                                                                                |           |                                        |                                      |                                               |
|----|------------------|--------------------------------------------------------------------------------------------------------------------------------------------------------------------------------------------------------------------------------------------------------------------------------|-----------|----------------------------------------|--------------------------------------|-----------------------------------------------|
|    |                  | 2. Closed or no reduction with plaster from toes to groin<br>3. Closed reduction and intramedullary Ender nailing + PTB-plaster<br>4. External fixation with Hoffman<br>5. Closed reduction and intramedullary Kuntscher's nailing<br>6. Open reduction and lag screw fixation |           |                                        |                                      |                                               |
| 11 | Tonnesen 1991    | ORIF                                                                                                                                                                                                                                                                           | -         | -                                      | -                                    | -                                             |
| 12 | Lin 2018         | ORIF                                                                                                                                                                                                                                                                           | -         | -                                      | -                                    | -                                             |
| 13 | White 2010       | ORIF                                                                                                                                                                                                                                                                           | -         | -                                      | -                                    | -                                             |
| 14 | krishnan 2015    | Maxillomandibular fixation (MMF)/ ORIF/ conservative or minimal intervention                                                                                                                                                                                                   | NA        | NA                                     | Smokers (n=15)                       | Non-smokers (n=19)                            |
| 15 | Zura 2016        | any fracture surgery                                                                                                                                                                                                                                                           | NA        | NA                                     | Former or current smokers (n=31,610) | Never smokers (n=277,720)                     |
| 16 | Gaal 2016        | ORIF of one or multiple sites with or closed reduction and intermaxillary fixation (CR-IMF) using any form of IMF technique                                                                                                                                                    | NA        | NA                                     | Smokers (n=345)                      | Non-smokers (n=165)                           |
| 17 | Sun 2018         | ORIF                                                                                                                                                                                                                                                                           | NA        | NA                                     | Current smoking (n=355)              | Non-current smoking (n=1155)                  |
| 18 | Zura 2017        | NA                                                                                                                                                                                                                                                                             | NA        | NA                                     | Former or current smokers (n=4,584)  | Non-smokers (n=51,908)                        |
| 19 | Boesmueller 2015 | ORIF using the Philos plate                                                                                                                                                                                                                                                    | cigarette | heavy smokers (>20 cigarettes per day) | heavy smokers >20cig/d (n=12)        | smoking≤20cig/d (n=42)<br>Non-smokers (n=100) |
| 20 | Cook 1977        | closed reduction and immobilization in a cast                                                                                                                                                                                                                                  | cigarette | NA                                     | Smokers (n=21)                       | Non-smokers (n=39)                            |
| 21 | Dailey 2018      | Reamed intramedullary nailing                                                                                                                                                                                                                                                  | NA        | NA                                     | Smokers (n=244)                      | Non-smokers (n=261)                           |
| 22 | Dingemans 2018   | negative pressure wound therapy following surgery                                                                                                                                                                                                                              | NA        | NA                                     | Smoking (n=44)                       | Non-smoking (n=56)                            |
| 23 | Femino 2010      | open reduction and lateral plate fixation without bone graft                                                                                                                                                                                                                   | NA        | average 1.5 packs per day              | Chronic smokers (n=7)                | Non-chronic smokers (n=6)                     |
| 24 | Giannoudis 2000  | intramedullary nailing                                                                                                                                                                                                                                                         | cigarette | >20 cigarettes per day                 | Heavy smokers (n=31)                 | Non-smokers (n=68)                            |
| 25 | Moghaddam 2010   | osteosynthetic procedure                                                                                                                                                                                                                                                       | cigarette | >5 cigarettes/day                      | Smokers (n=14)                       | Non-smokers (n=14)                            |
| 26 | Rose 2007        | ORIF                                                                                                                                                                                                                                                                           | NA        | NA                                     | Smokers (n=5)                        | Non-smokers (n=11)                            |
| 27 | Thompson 2017    | treated surgically within the Beaumont Healthcare System                                                                                                                                                                                                                       | NA        | NA                                     | Current and former smokers (n=25)    | Non-smokers (n=39)                            |
| 28 | Li 2015          | ORIF                                                                                                                                                                                                                                                                           | NA        | NA                                     | Active smokers (n=100)               | Non-smokers (n=238)                           |
| 29 | Xu 2019          | open plates/screws                                                                                                                                                                                                                                                             | NA        | NA                                     | Current smoking                      | Non-current smoking                           |

|    |                      |                                                         |           |                                                                                                     |                                                                |                                                                     |
|----|----------------------|---------------------------------------------------------|-----------|-----------------------------------------------------------------------------------------------------|----------------------------------------------------------------|---------------------------------------------------------------------|
|    |                      |                                                         |           |                                                                                                     | (n=NA)                                                         | (n=NA)                                                              |
| 30 | Zhu 2017             | ORIF                                                    | NA        | NA                                                                                                  | Current smoking<br>(n=22)                                      | Never smokers<br>(n=213)                                            |
| 31 | Fourgeaux2019        | Calcanail implant                                       | NA        | NA                                                                                                  | Active smokers<br>(n=10)                                       | Non-active smokers<br>(n=16)                                        |
| 32 | Hoffmann<br>2019     | Open or closed reduction and internal fixation          | NA        | NA                                                                                                  | Active Smoker and History of<br>smoking<br>(n=112)             | Non-smoking<br>(n=81)                                               |
| 33 | Serrano 2020         | conversion of closed treatment to surgical intervention | NA        | NA                                                                                                  | Smoking<br>(n=287)                                             | Non-smoking<br>(n=674)                                              |
| 34 | Hu J 2018            | ORIF or percutaneous screw fixation (PSF)               | NA        | NA                                                                                                  | Tobacco use<br>(n=21)                                          | Non-tobacco use<br>(n=275)                                          |
| 35 | Alemdaroglu<br>2009  | circular external fixator                               | NA        | NA                                                                                                  | Smoking<br>(n=13)                                              | Non-smoking<br>(n=19)                                               |
| 36 | Grun 2020            | percutaneous reduction and fixation                     | NA        | NA                                                                                                  | Smoking<br>(n=10)                                              | Non-smoking<br>(n=15)                                               |
| 37 | Vander Voort<br>2020 | operative fixation                                      | NA        | NA                                                                                                  | Current smoker<br>(n=35)                                       | Non-current smokers<br>(n=65)                                       |
| 38 | Baris 2020           | ORIF                                                    | NA        | NA                                                                                                  | Smoking<br>(n=32)                                              | Non-smoking<br>(n=28)                                               |
| 39 | O'Halloran K<br>2016 | reamed IM nail fixation                                 | NA        | NA                                                                                                  | Smoking<br>(n=153)                                             | Non-smoking<br>(n=229)                                              |
| 40 | Naumann 201<br>6     | ORIF                                                    | NA        | NA                                                                                                  | Current smoking<br>(n=136)                                     | Non-current smokers<br>(n=431)                                      |
| 41 | Kawasaki 202<br>1    | Intramedullary nailing                                  | NA        | NA                                                                                                  | Current smoker<br>(n=77)                                       | Non-current smokers<br>(n=181)                                      |
| 42 | Ahmed 2020           | Intramedullary nailing                                  | NA        | NA                                                                                                  | Smoker<br>(n=14)                                               | Non-smoker<br>(n=46)                                                |
| 43 | Cammas 2020          | ORIF                                                    | NA        | NA                                                                                                  | Active Smoker<br>(n=94)                                        | Non-smoker<br>(n=339)                                               |
| 44 | Halonen 2021         | intramedullary fixation                                 | NA        | NA                                                                                                  | Current smoker<br>(n=100)                                      | non-current smoker<br>(n=895)                                       |
| 45 | Goudie 2021          | nonoperative treatment                                  | cigarette | 1. >5 cigarettes or equivalent<br>/day<br>2. Nonsmoker or smokes ≤5<br>cigarettes or equivalent/day | Current smoker (>5 cigarettes<br>or equivalent/day)<br>(n=235) | Nonsmoker or smokes ≤5<br>cigarettes or equivalent/day<br>(n=1,995) |

Note: NA: not available; ORIF: open reduction and internal fixation

#### S6d. Summary of 45 studies for the qualitative synthesis (part 4)

| No | First author/<br>Publication<br>year | Alcohol type | Level of alcohol<br>consumption                                                                                            | Alcohol group                    | Alcohol Control                      | Follow-up<br>mean± SD, range     | Description of results and reasons for not including in meta-analysis                                                                                                                                                                                                                                                                       |
|----|--------------------------------------|--------------|----------------------------------------------------------------------------------------------------------------------------|----------------------------------|--------------------------------------|----------------------------------|---------------------------------------------------------------------------------------------------------------------------------------------------------------------------------------------------------------------------------------------------------------------------------------------------------------------------------------------|
| 1  | Arastu 2013                          | NA           | NA                                                                                                                         | Alcohol abusers<br>(n=3)         | Non-abusers<br>(n=28)                | 14.9 (7–30) months               | It was mentioned that there were no problems with wound healing in the follow-up period except one case of superficial wound infection. It means there was no event of deep infection occurred. However, there was no description whether the case was in smoker, alcohol abuser or control group.                                          |
| 2  | Bhandari 2004                        | NA           | 6.7±17.8 (2–75)<br>drinks/week                                                                                             | Alcohol<br>consumption<br>(n=13) | Non-alcohol<br>consumption<br>(n=17) | 24 months                        | No patient experienced a deep infection, nonunion or malunion during the follow-up period.                                                                                                                                                                                                                                                  |
| 3  | Sohn 2015                            | NA           | heavy alcoholics:<br>>14 standard<br>drinks per week or<br>4 drinks per day<br>or more than<br>600ml of alcohol<br>per day | Heavy alcoholics<br>(n=7)        | Non-heavy<br>alcoholics<br>(n=26)    | 17.6 (12–44) months              | There was no superficial infection or deep infection event occurred in both groups. And there was no description that whether the only one nonunion event occurred to current smoker, heavy alcoholic or control group.                                                                                                                     |
| 4  | Unlu 2015                            | NA           | NA                                                                                                                         | Alcohol history<br>(n=1)         | Non-alcohol<br>history<br>(n=19)     | 15.5 (12–26) months              | The mean interval to bony union was 21 (18–25) weeks in total patients. It means that all fractures developed delayed union or nonunion without normal union. However, no data of time to union for each group was described.                                                                                                               |
| 5  | Formica 2016                         | -            | -                                                                                                                          | -                                | -                                    | 1 year                           | No cases of nonunion were observed. There was no description that only one superficial infection occurred to tobacco user or control group.                                                                                                                                                                                                 |
| 6  | Frantz 2019                          | -            | -                                                                                                                          | -                                | -                                    | Follow-up was<br>performed<br>NA | The mean time to union was 22.8 weeks (n=36) in smoker group and 20.3 weeks (n=60) in non-smoker group without description of SD value.                                                                                                                                                                                                     |
| 7  | Pastides 2015                        | -            | -                                                                                                                          | -                                | -                                    | 24 (5–57) months                 | No deep infections developed in both groups.                                                                                                                                                                                                                                                                                                |
| 8  | Burnett 2019                         | -            | -                                                                                                                          | -                                | -                                    | Follow-up was<br>performed<br>NA | The mean time to full fracture healing assessed via radiographs was 3.7 (2–7) months in total patients. No significant difference was detected in the time to full healing in smokers compared with nonsmokers (p=0.26).                                                                                                                    |
| 9  | Johnston 2014                        | NA           | alcoholics: more<br>than 14 units per<br>week for women<br>and 21 units per<br>week for men                                | Alcoholics<br>(n=115)            | Non-alcoholics<br>(n=4,656)          | 1 year                           | Nonunion rates were 12 (n=115) and 289 (n=4,656) in alcohol drinking group and control group, respectively. However, control group (non-alcoholics) may include alcohol drinkers.                                                                                                                                                           |
| 10 | Nyquist 1997                         | NA           | NA                                                                                                                         | Alcohol abusers<br>(n=49)        | Non-abusers<br>(n=150)               | 14 years                         | Delayed union rates (no bone healing within 250 days) were 4 (n=49) and 16 (n=150) in alcohol drinking group and control group, respectively. And no difference was found between two groups. In addition, deep infection was seen in 1 alcohol abuser and 3 non-abusers. However, control group (non-abusers) may include alcohol drinkers |

|    |               |    |                                                               |                        |                             |                               |                                                                                                                                                                                                                                                                                                                                                                                                                                                                                                                                                             |
|----|---------------|----|---------------------------------------------------------------|------------------------|-----------------------------|-------------------------------|-------------------------------------------------------------------------------------------------------------------------------------------------------------------------------------------------------------------------------------------------------------------------------------------------------------------------------------------------------------------------------------------------------------------------------------------------------------------------------------------------------------------------------------------------------------|
| 11 | Tonnesen 1991 | NA | alcohol abusers: at least 5 Danish drinks (60g alcohol) a day | Alcohol abusers (n=90) | Non-abusers (n=90)          | 12 weeks                      | Infection rates were 14 (n=90) and 4 (n=90) in alcoholics group and control groups. In addition, no malunion was found in both groups. However, control group (non-alcoholics) may include alcohol drinkers                                                                                                                                                                                                                                                                                                                                                 |
| 12 | Lin 2018      | NA | alcoholism: >60g/day<br>non-alcoholism: ≤60g/day              | Alcoholism (n=32)      | Non-alcoholism (n=97)       | 53·39 (48–60) months          | Alcoholism (OR 1·679, p<0·05) was found one of the risk factors for postoperative wound infection through logistic regression analysis. However, control group (non-alcoholism) may include alcohol drinkers                                                                                                                                                                                                                                                                                                                                                |
| 13 | White 2010    | NA | NA                                                            | Alcohol abuse (n=5)    | Non-abusers (n=90)          | minimum 1 year                | Two patients with alcohol dependency developed deep infection (n=5) and 4 patients in control group develop deep infection (n=90). However, control group (non-alcohol abuse) may include alcohol drinkers                                                                                                                                                                                                                                                                                                                                                  |
| 14 | krishnan 2015 | NA | NA                                                            | Alcohol abuse (n=26)   | Non-alcohol abuse (n=8)     | (12–14) weeks                 | Outcomes of infection for each patient were listed in a table. In total, 4 smoking abuse (n=15) and 3 controls (n=18) developed infection, respectively. And 6 alcoholism (n=22) and 1 control (n=7) developed infection. However, control group (non-smoking abuse and non-alcoholism) may include current smokers, former smokers or alcohol drinkers                                                                                                                                                                                                     |
| 15 | Zura 2016     | NA | NA                                                            | Alcoholism (n=5,616)   | Non-alcoholism (n=303,714)  | at least 12 months            | Nonunion rate was 2,313 (n=31,610) and 12,936 (n=277,720) in smokers and non-smokers, and the rate was 418 (n=5,616) and 14,831 (n=303,714) in alcoholism and non-alcoholism, respectively. Regarding normal union rate was 29,297 (n=31,610) and 264,784 (n=277,720) in smoking group and non-smoking group, 5,198 (n=5,616) and 288,883 (n=303,714) in alcoholism group and non-alcoholism group, respectively. However, alcohol control group may include alcohol drinkers. Definition of nonunion and normal healing was described without time period. |
| 16 | Gaal 2016     | NA | NA                                                            | Alcohol use (n=337)    | Non-alcohol use (n=173)     | Follow-up was performed<br>NA | There were 70 smokers (n=345), 10 non-smokers (n=165), 53 drinkers (n=337) and 27 (n=173) developed surgical site infection. However, control group (non-active smoking) may include former smokers.                                                                                                                                                                                                                                                                                                                                                        |
| 17 | Sun 2018      | NA | NA                                                            | Alcohol abuse (n=150)  | Non-alcohol abuse (n=1,360) | NA                            | Surgical site infection rate were 13 current smokers (n=355), 53 non-smokers (n=1,155), 11 alcohol abusers (n=150) and 55 non-drinkers (n=1,360), respectively. Control group (non-current smoking, non-alcoholism) may include former smokers and alcohol drinkers.                                                                                                                                                                                                                                                                                        |
| 18 | Zura 2017     | NA | NA                                                            | Alcoholism (n=467)     | Non-alcoholism (n=56,025)   | NA                            | Nonunion occurred in 189 current or former smokers (n=4,584), 1251 non-smokers (n=51,908), 24 alcoholism (n=467) and 1,416 non-alcoholism (n=56,025), respectively. Regarding normal union, the results were 4,395 current or former smokers (n=4,584), 50,657 non-smokers (n=51,908), 443 alcoholism (n=467) and 54,609 non-alcoholism (n=56,025), respectively. Alcohol control group may include alcohol drinkers. Definition of nonunion and normal healing was described without time period.                                                          |

|    |                  |   |   |   |   |                                   |                                                                                                                                                                                                                                                                                                 |
|----|------------------|---|---|---|---|-----------------------------------|-------------------------------------------------------------------------------------------------------------------------------------------------------------------------------------------------------------------------------------------------------------------------------------------------|
| 19 | Boesmueller 2015 | - | - | - | - | Total 479 days ( $\geq 6$ months) | Nonunion occurred to 4 heavy smokers ( $n=12$ ) and 16 non-heavy smokers ( $n=142$ ), respectively. Control group included never smokers and smokers who smoked $\leq 20$ cigarettes per day.                                                                                                   |
| 20 | Cook 1977        | - | - | - | - | Tibial fracture 52 weeks          | Delayed union occurred to 5 smokers ( $n=21$ ) and 6 non-smokers ( $n=39$ ), respectively. Definition of delayed union which were fractures not healed at 150 days is not applicable in the current study.                                                                                      |
| 21 | Dailey 2018      | - | - | - | - | Follow-up was performed NA        | There were 38 of 244 smokers and 36 of 261 non-smokers developed nonunion. Definition of nonunion was described without time period.                                                                                                                                                            |
| 22 | Dingemans 2018   | - | - | - | - | Follow-up was performed NA        | One of 44 smokers and 1 of 56 non-smokers developed superficial surgical infection. And no smokers ( $n=44$ ) and 2 non-smokers ( $n=56$ ) developed deep infection. However, control group (non-substance abuse [smoking]) may include former smokers.                                         |
| 23 | Femino 2010      | - | - | - | - | 19 (2–41) months                  | Surgical site infection rate was 0 of 7 in smoker group and 1 of 6 in non-smoker group, respectively. However, control group (non-chronic smokers) may include former smokers.                                                                                                                  |
| 24 | Giannoudis 2000  | - | - | - | - | NA                                | Logistic regression analysis showed that smoking was not risk factor (OR 2.29, 95%CI [0.85–6.08], $p=0.11$ ) of nonunion. Definition of nonunion was described without time period.                                                                                                             |
| 25 | Moghaddam 2010   | - | - | - | - | 6 months after trauma             | Raw data of non-union group and union group was listed in a table. There were 7 of 14 smokers and 7 of non-smokers in non-union group and union group, respectively. No definitions of normal union and nonunion were described.                                                                |
| 26 | Rose 2007        | - | - | - | - | 12 (6–20) months                  | Three of 5 smokers and 1 of 11 non-smokers developed nonunion. In addition, 2 of 5 smokers and 10 of 11 non-smokers normally healed. Definition of fracture union was described without time period.                                                                                            |
| 27 | Thompson 2017    | - | - | - | - | at least 1 year                   | There were 2 of 25 smokers developed delayed union, and 1 former smoker developed nonunion. Delayed union or nonunion did not found in non-smokers ( $n=39$ ). And 22 of 25 smokers and all non-smokers were normally healed. However, there were no definitions of delayed union and nonunion. |
| 28 | Li 2015          | - | - | - | - | Follow-up was performed NA        | There were 4 of 100 smokers and 12 of 238 non-smokers developed surgical site infection. However, control group which is non-active smokers may include former smokers.                                                                                                                         |
| 29 | Xu 2019          | - | - | - | - | at least 1 year                   | Multivariate logistic regression analysis showed that current smoking was one of risk factors for post-operative surgical site infection (OR 3.22, 95%CI [1.71–4.68], $p<0.001$ ). However, control group which is non-current smoking may include former smokers.                              |
| 30 | Zhu 2017         | - | - | - | - | 12 months                         | Univariate analysis showed that surgical site infection occurred to 4 of 22 smokers and 8 of 213 non-smokers, respectively. However, control group included history of smoking and very occasionally                                                                                            |

|    |                   |    |    |                          |                                       |                                   |                                                                                                                                                                                                                                                                                                                                                                                                                                                                                                                                              |
|----|-------------------|----|----|--------------------------|---------------------------------------|-----------------------------------|----------------------------------------------------------------------------------------------------------------------------------------------------------------------------------------------------------------------------------------------------------------------------------------------------------------------------------------------------------------------------------------------------------------------------------------------------------------------------------------------------------------------------------------------|
|    |                   |    |    |                          |                                       |                                   | smoking <1 per 3 days, which is not never smoking.                                                                                                                                                                                                                                                                                                                                                                                                                                                                                           |
| 31 | Fourgeaux2019     | -  | -  | -                        | -                                     | 2·8 years±8 months (24–48 months) | One of 10 active smokers and no non-smokers developed delayed wound healing. However, control group (non-active smokers) may include former smokers.                                                                                                                                                                                                                                                                                                                                                                                         |
| 32 | Hoffmann 2019     | -  | -  | -                        | -                                     | 15·2 (6–97) months                | Five of 32 active smokers and 2 of 81 non-smokers developed nonunion. However, definition of nonunion was described without time period.                                                                                                                                                                                                                                                                                                                                                                                                     |
| 33 | Serrano 2020      | NA | NA | Alcohol drinking (n=193) | Non-drinking (n=768)                  | 4, 8 weeks, 3, 6 months           | There were 67 of 287 smokers, 129 of 674 non-smokers, 51 of 193 alcohol drinking and 145 of 768 non-drinking developed nonunion. However, healing period of nonunion was not clear. In the study, 207 developed a nonunion at a mean of 23 weeks without range.                                                                                                                                                                                                                                                                              |
| 34 | Hu J 2018         | NA | NA | Alcohol use (n=35)       | Non-alcohol use (n=261)               | median 52 (12–118) months         | Bone healing time was 11·5±5·7 weeks (n=21) in smoking group, 10·2±6·5 weeks (n=275) in non-smoking group, 13·5±10·0 weeks (n=35) in drinking group and 9·8±5·6 weeks (n=261) in non-drinking group, respectively. However, regarding time to union, patients with nonunion were regarded as having invalid data and were excluded in the counts.                                                                                                                                                                                            |
| 35 | Alemdaroglu 2009  | -  | -  | -                        | -                                     | at least 6 months                 | Time to union was 27·54±11·61 weeks (n=13) in smoking group and 21·37±5·08 weeks (n=19) in non-smoking group (p=0·16), respectively. However, 2 fractures were still non-united at the 52nd week (end of follow-up period). Time to union of the 2 fractures was recorded as 52 weeks for the statistical analysis purpose of calculating healing time. Thus, the result was not actual.                                                                                                                                                     |
| 36 | Grun 2020         | -  | -  | -                        | -                                     | 15 (12–33) months                 | There were no wound-healing complications or surgical site infections.                                                                                                                                                                                                                                                                                                                                                                                                                                                                       |
| 37 | Vander Voort 2020 | -  | -  | -                        | -                                     | median 20 (3–97) months           | Regarding to nonunion, no obvious difference was found between current smokers (7/35) and non-current smokers (11/65). For deep surgical site infection, there was also no obvious difference between current smokers (9/35) and non-current smokers (26/65). However, control group may include former smokers.                                                                                                                                                                                                                             |
| 38 | Baris 2020        | -  | -  | -                        | -                                     | 42·7±4·6 (36–66) months           | Time to union was obviously greater in smoking group (n=32) compared with nonsmoking group (n=28) (17·1±6·0 weeks vs. 15·2±2·3 weeks, p=0·04). However, time to union was not clearly defined.                                                                                                                                                                                                                                                                                                                                               |
| 39 | O'Halloran K 2016 | NA | NA | heavy drinker (n=104)    | Non-drinker or social drinker (n=278) | minimum of 9 months               | Nonunion rate was 29 (n=153) and 27 (n=229) in smokers and non-smokers, and the rate was 20 (n=104) and 36 (n=278) in heavy drinkers and non-drinkers or social drinkers, respectively. Regarding normal union rate was 124 (n=153) and 202 (n=229) in smoking group and non-smoking group, 84 (n=104) and 242 (n=278) in heavy drinker group and non-drinkers or social drinker group, respectively. However, alcohol control group included alcohol drinkers. Definition of nonunion and normal healing was described without time period. |
| 40 | Naumann 2016      | -  | -  | -                        | -                                     | NA                                | Undefined infection rate was 10 (n=136) and 19 (n=431) in current smoker group and non-current smoker group, respectively.                                                                                                                                                                                                                                                                                                                                                                                                                   |

|    |               |   |   |                                            |                                              |                               |                                                                                                                                                                                                                                                                                                                                                                              |
|----|---------------|---|---|--------------------------------------------|----------------------------------------------|-------------------------------|------------------------------------------------------------------------------------------------------------------------------------------------------------------------------------------------------------------------------------------------------------------------------------------------------------------------------------------------------------------------------|
|    |               |   |   |                                            |                                              |                               | y. However, control group may include former smoker.                                                                                                                                                                                                                                                                                                                         |
| 41 | Kawasaki 2021 | - | - | -                                          | -                                            | 12 months                     | Nonunion rate was 16 ( <i>n</i> =77) in current smoker group and 26 ( <i>n</i> =181) in non-current smoker group, respectively. However, control group may include former smoker.                                                                                                                                                                                            |
| 42 | Ahmed 2020    | - | - | -                                          | -                                            | at least 6 months             | Union rate was 8 ( <i>n</i> =14) in smoker group and 38 ( <i>n</i> =46) in non-smoker group. However, union was recorded without time period.                                                                                                                                                                                                                                |
| 43 | Cammas 2020   | - | - | Alcohol abuse ( <i>n</i> =NA)              | Non-abuser ( <i>n</i> =NA)                   | mean 1 year (30 days–5 years) | Nonunion rate was OR 2.998, 95%CI 1.27–7.06 between alcohol abuser and non-abuser. However, control group may include alcohol drinker.                                                                                                                                                                                                                                       |
| 44 | Halonen 2021  | - | - | Alcohol abuse ( <i>n</i> =74)              | Non-abuser ( <i>n</i> =921)                  | 2 years or until death        | Surgical site infection rate was 6 ( <i>n</i> =100) in current smoker and 22 ( <i>n</i> =895) in non-current smoker group, 3 ( <i>n</i> =74) in alcohol abuser group and 25 ( <i>n</i> =921) in non-abuser group. However, control group may include former smoker or alcohol drinker.                                                                                       |
| 45 | Goudie 2021   | - | - | >20 units of alcohol/week ( <i>n</i> =142) | ≤20 units of alcohol/week ( <i>n</i> =2,088) | 24 weeks                      | Nonunion rate was 70 ( <i>n</i> =235) in current smoker group (>5 cigarettes or equivalent/day) and 161 ( <i>n</i> =1,995) in nonsmoker or smoke≤5 cigarettes or equivalent/day group, 26 ( <i>n</i> =142) in ≥20 units of alcohol/week group, and 205 ( <i>n</i> =2,088) in ≤20 units of alcohol/week group. However, control group may include smoker and alcohol drinker. |

Note: NA: not available; OR: odds ratio.



## Appendix S7. Summary of 19 studies about the impacts of preoperative smoking cessation time, nicotine replacement therapy, and vaping

Summary of 19 studies about the impacts of preoperative smoking cessation time, nicotine replacement therapy (NRT), and vaping was described in **Appendix S7a to d**.

### S7a. Summary of 19 studies concerning the impacts of preoperative smoking cessation time, NRT, and vaping (part 1)

| No | First author/<br>Publication year | Journal name                              | country   | Study design                                         | Sex<br>M/F | Age/yr<br>mean±SD (range)                                                                                                                  | Race | BMI<br>(kg/m <sup>2</sup> ) |
|----|-----------------------------------|-------------------------------------------|-----------|------------------------------------------------------|------------|--------------------------------------------------------------------------------------------------------------------------------------------|------|-----------------------------|
| 1  | Glassman 2000[104]                | Spine                                     | US        | retrospective cohort study                           | 202/155    | Mean 43·91                                                                                                                                 | NA   | NA                          |
| 2  | Sørensen 2007[105]                | Hernia                                    | Denmark   | Prospective cohort study                             | 180/33     | 1. Standard advice group: median 56 (IQR 46–66)<br>2. Telephone group: median 54 (IQR 42–64)<br>3. Outpatient group: median 54 (IQR 45–65) | NA   | Mean 24·85                  |
| 3  | Delaunay 2018[106]                | Annales de chirurgie plastique esthétique | France    | retrospective cohort study                           | 12/209     | 41·2±9·95 (19–66)                                                                                                                          | NA   | 28·09±7·58 (20·1–36)        |
| 4  | Padubidri 2001[107]               | Plastic and Reconstructive Surgery        | US        | cohort study                                         | 0/748      | Mean 49·12 (14–77)                                                                                                                         | NA   | NA                          |
| 5  | Moller 2002[108]                  | Lancet                                    | Denmark   | randomised controlled trial                          | 46/62      | Mean 65·04 (30–85)                                                                                                                         | NA   | Mean 26·52                  |
| 6  | Araco 2008[109]                   | Plastic and Reconstructive Surgery        | UK, Italy | prospectively                                        | 33/51      | 42±23                                                                                                                                      | NA   | 26±3                        |
| 7  | Chan 2006[110]                    | Annals of Plastic Surgery                 | UK        | cohort study                                         | NA         | Mean 36·18                                                                                                                                 | NA   | Mean 26·72                  |
| 8  | Gravante 2007[111]                | Obesity Surgery                           | UK, Italy | prospective cohort study                             | 15/45      | Mean 42·5                                                                                                                                  | NA   | 55±8                        |
| 9  | Gravante 2008[112]                | Aesth Plast Surg                          | UK, Italy | prospective cohort study                             | NA         | 54±5 (41–70)                                                                                                                               | NA   | 28·7±4 (20·4–39·8)          |
| 10 | Herrero 2020[113]                 | Journal of Orthopaedics                   | US        | cohort study                                         | 104/97     | Mean 57·64                                                                                                                                 | NA   | Mean 30·55                  |
| 11 | Jung 2014[114]                    | Gastric Cancer                            | Korea     | Retrospective cohort study (prospectively collected) | 855/480    | Mean 56·04                                                                                                                                 | NA   | Mean 23·8                   |
| 12 | Kuri 2005[115]                    | Anesthesiology                            | Japan     | retrospective cohort study                           | 150/38     | Mean 59·06                                                                                                                                 | NA   | Mean 21·02                  |
| 13 | Quan 2019[116]                    | World Journal of Surgical Oncology        | China     | retrospective cohort study                           | 1624/845   | Mean 55·44                                                                                                                                 | NA   | Mean 21·83                  |
| 14 | Sorensen 2003a[117]               | Colorectal Disease                        | Denmark   | prospective cohort study                             | 37/20      | Intervention group: median 65 (34–87)                                                                                                      | NA   | Mean 23·71                  |

|    |                     |                             |         |                             |        |                                                                                     |    |                                                                                             |
|----|---------------------|-----------------------------|---------|-----------------------------|--------|-------------------------------------------------------------------------------------|----|---------------------------------------------------------------------------------------------|
|    |                     |                             |         |                             |        | control group:<br>median 66 (42–83)                                                 |    |                                                                                             |
| 15 | Thomsen 2010[118]   | Nicotine & Tobacco Research | Denmark | randomised controlled trial | 0/130  | Intervention group:<br>median 57·5 (35–79)<br>control group:<br>median 56·5 (36–82) | NA | Intervention group:<br>median 24·2 (15·2–36·2)<br>control group:<br>median 23·1 (16·5–37·9) |
| 16 | Yoshida 2015[119]   | World Journal of Surgery    | Japan   | retrospective cohort study  | 208/38 | 65·8±8·8                                                                            | NA | NA                                                                                          |
| 17 | Sorensen 2003b[120] | Annals of surgery           | Denmark | cohort study                | 39/39  | Mean 30·31 (20–40)                                                                  | NA | Mean 23·28                                                                                  |
| 18 | Sorensen 2010[121]  | Surgery                     | UK      | cohort study                | 31/31  | Smokers:<br>median 33 (20–40)<br>Never smoker:<br>median 26 (20–40)                 | NA | NA                                                                                          |
| 19 | Lindström 2008      | Annals of surgery           | Sweden  | randomised controlled trial | 54/48  | intervention:<br>median 55 (IQR 46–60)<br>control:<br>median 57·5 (IQR 49–64)       | NA | intervention:<br>median 26 (IQR 24–30)<br>control:<br>median 25 (IQR 23–29)                 |

Note: M: male; F: female; SD: standard deviation; BMI: body mass index; NA: not available; IQR: interquartile range

### S7b. Summary of 19 studies concerning the impacts of preoperative smoking cessation time, NRT, and vaping (part 2)

| No | First author/<br>Publication year | Weight<br>(kg) | Height (cm) | Diabetes      | Use of NS<br>AIDs | Use of fluor<br>o-quinolone<br>family of an<br>tiotics | Inclusion and exclusion criteria                                                                                                                                                                                                                                                                                                                                                                                                                                                                                                                                  | Surgery type                                             |
|----|-----------------------------------|----------------|-------------|---------------|-------------------|--------------------------------------------------------|-------------------------------------------------------------------------------------------------------------------------------------------------------------------------------------------------------------------------------------------------------------------------------------------------------------------------------------------------------------------------------------------------------------------------------------------------------------------------------------------------------------------------------------------------------------------|----------------------------------------------------------|
| 1  | Glassman 2000                     | NA             | NA          | NA            | NA                | NA                                                     | Inclusion criteria:<br>1. degenerative collapse with spinal stenosis, pseudarthrosis, mechanical low back pain, discogenic low back pain, or spinal instability. Instability was subclassified as spondylolisthesis, postdiscectomy instability, or mechanical instability based on flexion–extension radiographs.<br>2. patients who had undergone posterior instrumented fusion at either L4–L5 or L4–S1 from 1992 through 1996<br>3. All fusion procedures were performed using similar pedicle screw and rod constructs and autologous iliac crest bone graft | posterior instrumented fusion at either L4–L5 or L4–S1   |
| 2  | Sørensen 2007                     | NA             | NA          | 8 (3·7<br>6%) | NA                | NA                                                     | daily smokers scheduled for elective open incisional or inguinal day-case herniotomy were included in the study                                                                                                                                                                                                                                                                                                                                                                                                                                                   | elective open incisional or inguinal day-case herniotomy |
| 3  | Delaunay 2018                     | NA             | NA          | 21 (9·5)      | NA                | NA                                                     | Inclusion criteria:                                                                                                                                                                                                                                                                                                                                                                                                                                                                                                                                               | Abdominoplasty with umbilical                            |

|   |                |        |        |           |    |    |                                                                                                                                                                                                                                                                                                                                                                                                                                                                                                                                                                                                         |                                                                                                 |
|---|----------------|--------|--------|-----------|----|----|---------------------------------------------------------------------------------------------------------------------------------------------------------------------------------------------------------------------------------------------------------------------------------------------------------------------------------------------------------------------------------------------------------------------------------------------------------------------------------------------------------------------------------------------------------------------------------------------------------|-------------------------------------------------------------------------------------------------|
|   |                |        |        | 0%)       |    |    | patients who underwent an abdominoplasty with umbilical transposition and lipoaspiration of flanks and epigastrium, with the handle bar incision, undermining as far as the xyphoid appendix and the upper tension technique                                                                                                                                                                                                                                                                                                                                                                            | transposition and lipoaspiration of flanks and epigastrium                                      |
| 4 | Padubidri 2001 | NA     | NA     | NA        | NA | NA | NA                                                                                                                                                                                                                                                                                                                                                                                                                                                                                                                                                                                                      | Breast reconstruction                                                                           |
| 5 | Moller 2002    | NA     | NA     | 4 (3.70%) | NA | NA | Inclusion criteria:<br>Patients scheduled for primary elective hip or knee alloplasty at three university-affiliated hospitals in Copenhagen were invited to enter the study. All daily smokers were eligible for the study.<br>Exclusion criteria:<br>patients with a weekly alcohol intake greater than 35 units                                                                                                                                                                                                                                                                                      | Elective hip or knee replacement                                                                |
| 6 | Araco 2008     | 72±8.5 | 167±13 | NA        | NA | NA | Inclusion criteria:<br>patients who underwent abdominoplasty for cosmetic purposes<br>Exclusion criteria:<br>1. patients within 1 year after bariatric surgery<br>2. those with ongoing clinical infections<br>3. that received a complete antibiotic course in the previous 6 months<br>4. those under steroid therapy<br>5. those with systemic diseases that could impair tissue oxygenation or wound repair (e.g., arteriosclerosis, diabetes mellitus).                                                                                                                                            | Abdominoplasty for cosmetic purposes                                                            |
| 7 | Chan 2006      | NA     | NA     | NA        | NA | NA | Inclusion criteria:<br>Patients who underwent bilateral breast reduction surgery<br>Exclusion criteria:<br>Four patients were excluded due to small volume reductions (<400 g in total).                                                                                                                                                                                                                                                                                                                                                                                                                | Bilateral breast reduction surgery                                                              |
| 8 | Gravante 2007  | 133±16 | 156±7  | NA        | NA | NA | Inclusion criteria:<br>Patients who presented to the hospital requesting an abdominoplasty after massive weight loss obtained after laparoscopic adjustable gastric banding<br>Exclusion criteria:<br>1. patients with ongoing clinical infections<br>2. patients received a complete course of antibiotic for an infection in the last 6 months prior to operation<br>3. patients requesting steroid therapy<br>4. patients with systemic diseases that could impair wound repair (arteriosclerosis, diabetes mellitus)<br>5. those <1 year since their bariatric surgery<br>6. cigar and pipe smokers | abdominoplasty after massive weight loss obtained after laparoscopic adjustable gastric banding |

|    |                |                     |                    |    |    |    |                                                                                                                                                                                                                                                                                                                                                                                                                                                                            |                                                                                                                                                                                            |
|----|----------------|---------------------|--------------------|----|----|----|----------------------------------------------------------------------------------------------------------------------------------------------------------------------------------------------------------------------------------------------------------------------------------------------------------------------------------------------------------------------------------------------------------------------------------------------------------------------------|--------------------------------------------------------------------------------------------------------------------------------------------------------------------------------------------|
| 9  | Gravante 2008  | 76±10<br>(59 to 93) | 163±6 (147 to 180) | NA | NA | NA | Inclusion criteria:<br>patients who had undergone breast reductions<br>Exclusion criteria:<br>1. Patients who had previously undergone bariatric surgery<br>2. Patients who had ongoing clinical infections or had received a complete antibiotic course in the 6 months preceding the operation<br>3. Patients receiving steroid therapy<br>4. Patients with systemic diseases that could impair tissue oxygenation or wound repair (arteriosclerosis, diabetes mellitus) | breast reductions                                                                                                                                                                          |
| 10 | Herrero 2020   | NA                  | NA                 | NA | NA | NA | Inclusion criteria:<br>smokers greater than or equal to 18-years-old undergoing primary, elective total joint arthroplasty (TJA)<br>Exclusion criteria:<br>1. Non-smokers<br>2. Patients who were less than 18-years-old<br>3. Patients who underwent nonelective TJA.                                                                                                                                                                                                     | total joint arthroplasty                                                                                                                                                                   |
| 11 | Jung 2014      | NA                  | NA                 | NA | NA | NA | Inclusion criteria:<br>Patients who were diagnosed with primary gastric adenocarcinoma and underwent radical gastrectomy                                                                                                                                                                                                                                                                                                                                                   | radical gastrectomy                                                                                                                                                                        |
| 12 | Kuri 2005      | NA                  | NA                 | NA | NA | NA | Inclusion criteria:<br>Patients who underwent removal of nasal, oral, pharyngeal, laryngeal, or cervical esophageal cancer and reconstruction requiring a free flap with a vascular pedicle                                                                                                                                                                                                                                                                                | removal of nasal, oral, pharyngeal, laryngeal, or cervical esophageal cancer and reconstruction requiring a free flap with a vascular pedicle                                              |
| 13 | Quan 2019      | NA                  | NA                 | NA | NA | NA | Inclusion criteria:<br>Adult (≥18 years) patients with gastric cancer (GC) who underwent operation<br>Exclusion criteria:<br>1. Non-resection surgery<br>2. Palliative gastrectomy<br>3. Emergency surgery<br>4. Remnants of gastric cancer<br>5. Other synchronous malignancies<br>6. Stage IV operated with curable intent<br>7. Taking corticosteroid drugs for long term<br>8. Active infections disease<br>9. Missing clinical and/or laboratory data                 | Open procedure with D2 or D2 + lymphadenectomy.<br>Total laparoscopy or laparoscopy-assisted gastrectomy with D1 + $\alpha$ or $\beta$ lymphadenectomy.<br>Combined multi-organ resection. |
| 14 | Sorensen 2003a | NA                  | NA                 | NA | NA | NA | Inclusion criteria:<br>Patients who smoked daily and were scheduled for an open colonic or rectal operative procedure with formation of an enteric anastomosis<br>Exclusion criteria:                                                                                                                                                                                                                                                                                      | 1. Colonic resection<br>2. Other colonic procedure<br>3. Rectal resection<br>4. Explorative laparotomy<br>5. Mechanical bowel preparation                                                  |

|    |                |    |    |                 |    |    |                                                                                                                                                                                                                                                                                                                                                                                                                                                                                                                      |                                                                                                           |
|----|----------------|----|----|-----------------|----|----|----------------------------------------------------------------------------------------------------------------------------------------------------------------------------------------------------------------------------------------------------------------------------------------------------------------------------------------------------------------------------------------------------------------------------------------------------------------------------------------------------------------------|-----------------------------------------------------------------------------------------------------------|
|    |                |    |    |                 |    |    | Patients with inflammatory bowel disease                                                                                                                                                                                                                                                                                                                                                                                                                                                                             | n<br>6. Postoperative enteral feed tube                                                                   |
| 15 | Thomsen 2010   | NA | NA | 4 (3.0<br>8%)   | NA | NA | Inclusion criteria:<br>1. Patients had to be women<br>2. Patients who were daily smokers<br>3. Patients who aged 18 years and above<br>4. Patients who have sufficient language proficiency<br>Exclusion criteria:<br>patients with weekly alcohol intake exceeding 35 units, substance abuse, diagnosed psychiatric disease, dementia, American Society of Anesthesiologists' (ASA) physical status classification-class>3, penetrating cancer, pregnancy and lactation, and preoperative neoadjuvant chemotherapy. | breast cancer surgery                                                                                     |
| 16 | Yoshida 2015   | NA | NA | 28 (11.3<br>8%) | NA | NA | Inclusion criteria:<br>patients underwent elective esophagectomy with 2- or 3-field lymphadenectomy for esophageal cancer                                                                                                                                                                                                                                                                                                                                                                                            | elective esophagectomy with 2- or 3-field lymphadenectomy                                                 |
| 17 | Sorensen 2003b | NA | NA | NA              | NA | NA | Exclusion criteria were chronic medical disease, atopic dermatitis or other skin disease, pregnancy, menopause, allergy to local anesthetics, dressing, or patches, and current or recent medication with corticosteroids, NSAID, or aspirin                                                                                                                                                                                                                                                                         | 5-mm full-thickness punch biopsy wound                                                                    |
| 18 | Sorensen 2010  | NA | NA | NA              | 0  | NA | Inclusion criteria:<br>Not mentioned.<br>Exclusion criteria:<br>Chronic medical disease, pregnancy, menopause, and current or recent medication with corticosteroids or non-steroidal anti-inflammatory drugs (also known as NSAIDs).                                                                                                                                                                                                                                                                                | 5-mm, full-thickness punch biopsy on the skin over the medial gluteal muscle 4–6 cm lateral to the sacrum |
| 19 | Lindström 2008 | NA | NA | 2 (1.9<br>6%)   | NA | NA | Inclusion criteria:<br>1. patients had to be daily smokers (>2 cigarettes daily for at least 1 year before inclusion)<br>2. aged 18 to 79 years.<br>Exclusion criteria:<br>Patients with overt alcohol or drug abuse, pregnancy, severe mental illness, dementia, and poor Swedish language proficiency.                                                                                                                                                                                                             | primary inguinal and umbilical hernia repair, laparoscopic cholecystectomy, or a hip or knee prosthesis   |

Note: NA: not available.

### S7c. Summary of 19 studies concerning the impacts of preoperative smoking cessation time, NRT, and vaping (part 3)

| No | First author/<br>Publication year | Groups | Cessation contents |
|----|-----------------------------------|--------|--------------------|
|----|-----------------------------------|--------|--------------------|

|   |                |                                                                                                                                                                                                                                                                                                                                                                                                                                                                                                                                              |                                                                                                                                                                                                                                                                                                                                                                                                                                                                                                                                                                                                                                                                                                                                                                                                                                                                                                                                                      |
|---|----------------|----------------------------------------------------------------------------------------------------------------------------------------------------------------------------------------------------------------------------------------------------------------------------------------------------------------------------------------------------------------------------------------------------------------------------------------------------------------------------------------------------------------------------------------------|------------------------------------------------------------------------------------------------------------------------------------------------------------------------------------------------------------------------------------------------------------------------------------------------------------------------------------------------------------------------------------------------------------------------------------------------------------------------------------------------------------------------------------------------------------------------------------------------------------------------------------------------------------------------------------------------------------------------------------------------------------------------------------------------------------------------------------------------------------------------------------------------------------------------------------------------------|
| 1 | Glassman 2000  | <ol style="list-style-type: none"> <li>1. Non-smokers (<math>n=169</math>)</li> <li>2. None cessation (continuous smoking) before surgery (<math>n=63</math>)</li> <li>3. Cessation &lt;1 month before surgery (<math>n=74</math>)</li> <li>4. Cessation &gt;1 month before surgery (<math>n=51</math>)</li> <li>5. None cessation (continuous smoking) after surgery (<math>n=68</math>)</li> <li>6. Cessation 1–6 months after surgery (<math>n=44</math>)</li> <li>7. Cessation &gt;6 months after surgery (<math>n=76</math>)</li> </ol> | same as left                                                                                                                                                                                                                                                                                                                                                                                                                                                                                                                                                                                                                                                                                                                                                                                                                                                                                                                                         |
| 2 | Sørensen 2007  | <ol style="list-style-type: none"> <li>1. Standard advised group (<math>n=48</math>)</li> <li>2. Advised and reminder group (<math>n=101</math>)</li> <li>3. Non-advised group (<math>n=64</math>)</li> </ol>                                                                                                                                                                                                                                                                                                                                | <ol style="list-style-type: none"> <li>1. Standard advised group were given the standard advice and were not contacted until the day of surgery.</li> <li>2. Advised and reminder group were given the standard advice and were reminded by the study nurse 1 month before surgery during a 10 min telephone conversation, or were given the standard advice and were reminded 1 month before surgery during a 20 min meeting with a study nurse in the outpatient clinic. At the end of this meeting the patient was advised to use nicotine replacement drugs until 24 h before surgery and a sample of different types (Nicorette Patch (10 and 15 mg), Nicorette Chewing Gum (2 and 4 mg), Nicorette Resoriblet (2 mg), Nicorette Inhalator (10 mg), or Nicorette Nasal Spray (500 µg per dose)) was offered for a few days use according to the patient's preference.</li> <li>3. Non-advised group were not advised to quit smoking</li> </ol> |
| 3 | Delaunay 2018  | <ol style="list-style-type: none"> <li>1. Nonsmokers (<math>n=96</math>)</li> <li>2. Active smokers (<math>n=71</math>)</li> <li>3. Former smokers (<math>n=29</math>)</li> </ol>                                                                                                                                                                                                                                                                                                                                                            | Active smokers were asked to stop all smoking consumption 4 weeks before and after surgery                                                                                                                                                                                                                                                                                                                                                                                                                                                                                                                                                                                                                                                                                                                                                                                                                                                           |
| 4 | Padubidri 2001 | <ol style="list-style-type: none"> <li>1. Smokers (<math>n=155</math>)</li> <li>2. Ex-smokers (<math>n=76</math>)</li> <li>3. Nonsmokers (<math>n=517</math>)</li> </ol>                                                                                                                                                                                                                                                                                                                                                                     | Smokers were asked to quit smoking when they were first seen in the outpatients clinic. Elective surgery usually was scheduled after 3 weeks. Patients who reported that they had quit smoking 3 weeks or more before surgery were classified as ex-smokers                                                                                                                                                                                                                                                                                                                                                                                                                                                                                                                                                                                                                                                                                          |
| 5 | Moller 2002    | <ol style="list-style-type: none"> <li>1. Intervention group (<math>n=56</math>)</li> <li>2. Control group (daily smoker) (<math>n=52</math>)</li> </ol>                                                                                                                                                                                                                                                                                                                                                                                     | <p>The intervention period was 6–8 weeks before and 10 days after operation.</p> <p>The patients in the intervention group were offered a meeting every week with the project nurse. At the first meeting a Fagerstöm test was done, to estimate the magnitude and profile of nicotine dependence. A personalised nicotine substitution schedule was devised in accordance with the test results and patient's preference. Patients were strongly encouraged to stop smoking completely, but they also had the option to reduce their tobacco consumption by at least 50%.</p> <p>The controls received standard care, which meant little or no information about the risk of tobacco smoking or smoking cessation counselling.</p>                                                                                                                                                                                                                  |
| 6 | Araco 2008     | <ol style="list-style-type: none"> <li>1. Smokers (<math>n=42</math>)</li> <li>2. Nonsmokers (<math>n=42</math>)</li> </ol>                                                                                                                                                                                                                                                                                                                                                                                                                  | Smokers were invited to stop smoking at least 4 weeks before surgery. Those that failed had their surgery postponed until 4 weeks of cessation were obtained. Every                                                                                                                                                                                                                                                                                                                                                                                                                                                                                                                                                                                                                                                                                                                                                                                  |
| 7 | Chan 2006      | <ol style="list-style-type: none"> <li>1. Continuous smoking (<math>n=31</math>)</li> <li>2. Stopped smoking &lt;4 weeks (<math>n=19</math>)</li> <li>3. Stopped smoking &gt;4 weeks (<math>n=15</math>)</li> <li>4. Nonsmokers (<math>n=104</math>)</li> </ol>                                                                                                                                                                                                                                                                              | All patients had been asked to stop smoking at least 1 month before surgery until the wounds had completely healed as a hospital policy.                                                                                                                                                                                                                                                                                                                                                                                                                                                                                                                                                                                                                                                                                                                                                                                                             |
| 8 | Gravante 2007  | <ol style="list-style-type: none"> <li>1. Smokers (<math>n=30</math>)</li> <li>2. Non-smokers (<math>n=30</math>)</li> </ol>                                                                                                                                                                                                                                                                                                                                                                                                                 | Smokers were asked to stop at least for 4 weeks before surgery. Those who failed (after confirmation of relatives) had their operation postponed until 4 weeks of smoking cessation were obtained                                                                                                                                                                                                                                                                                                                                                                                                                                                                                                                                                                                                                                                                                                                                                    |

|    |                |                                                                                                                                                                                                                                                               |                                                                                                                                                                                                                                                                                                                                                                                                                                                                             |
|----|----------------|---------------------------------------------------------------------------------------------------------------------------------------------------------------------------------------------------------------------------------------------------------------|-----------------------------------------------------------------------------------------------------------------------------------------------------------------------------------------------------------------------------------------------------------------------------------------------------------------------------------------------------------------------------------------------------------------------------------------------------------------------------|
| 9  | Gravante 2008  | 1. Smokers ( <i>n</i> =43)<br>2. Nonsmokers ( <i>n</i> =44)                                                                                                                                                                                                   | Patients were instructed to stop smoking at least 4 weeks before surgery. Those who failed to stop smoking had their surgery postponed until they had obtained 4 weeks of smoking cessation.                                                                                                                                                                                                                                                                                |
| 10 | Herrero 2020   | 1. Quit smoking ( <i>n</i> =80)<br>2. Smoking ( <i>n</i> =120)                                                                                                                                                                                                | Smoking cessation program (SCP) interventions are initiated 4–6 weeks prior to surgery, with a goal of being tobacco free 1–2 weeks prior to surgery. The protocol consists of four pre-operative telephone sessions including assessment, education, counseling, nicotine replacement therapy (NRT), and two follow-up sessions within 30 days after surgery. Self smoking cessation was also performed in self-treatment group.                                           |
| 11 | Jung 2014      | 1. Nonsmokers ( <i>n</i> =813)<br>2. Smoking cessation $\geq 8$ weeks ( <i>n</i> =193)<br>3. Smoking cessation 4 to $< 8$ weeks ( <i>n</i> =82)<br>4. Smoking cessation 2 to $< 4$ weeks ( <i>n</i> =40)<br>5. Smoking cessation $< 2$ weeks ( <i>n</i> =207) | Smoking cessation period before the surgery ( $< 2$ , 2 to $< 4$ , 4 to $< 8$ , and $\geq 8$ weeks) because the interval from the diagnosis of gastric cancer to the surgery in our hospital was approximately 2–8 weeks                                                                                                                                                                                                                                                    |
| 12 | Kuri 2005      | 1. Smokers ( <i>n</i> =28)<br>2. Late quitters ( <i>n</i> =34)<br>3. Intermediate quitters ( <i>n</i> =20)<br>4. Early quitters ( <i>n</i> =66)<br>5. Nonsmokers ( <i>n</i> =40)                                                                              | The late, intermediate, and early quitters were defined as patients whose smoke-free duration was between 8 and 21 days ( <i>n</i> =34), between 22 and 42 days ( <i>n</i> =20), and more than 43 days ( <i>n</i> =66) before the operation, respectively                                                                                                                                                                                                                   |
| 13 | Quan 2019      | 1. Non-smokers ( <i>n</i> =1,413)<br>2. Smoking cessation $\leq 2$ weeks ( <i>n</i> =823)<br>3. Smoking cessation 2 to 4 weeks ( <i>n</i> =40)<br>4. Smoking cessation $\geq 4$ weeks ( <i>n</i> =193)                                                        | All smokers were instructed to quit smoking immediately when they were admitted. Smokers were divided into three categories depending on their smoking cessation period before surgery ( $\leq 2$ , 2 to 4, and $\geq 4$ weeks).                                                                                                                                                                                                                                            |
| 14 | Sorensen 2003a | 1. Intervention group ( <i>n</i> =27)<br>2. Control group (daily smoker) ( <i>n</i> =30)                                                                                                                                                                      | Patients randomised to the intervention group were asked to stop smoking the following day until the time of removal of sutures after surgery. A pre-operative intervention period of 2–3 weeks was intended to obtain a sufficient smoking-free interval within a pre-operative waiting period. patients in the intervention group were offered pre- and post-operative individual support by the project nurse and nicotine replacement therapy until 24 h before surgery |
| 15 | Thomsen 2010   | 1. Intervention group ( <i>n</i> =57)<br>2. Control group (daily smoker) ( <i>n</i> =62)                                                                                                                                                                      | Complete smoking cessation was recommended from 2 days before to 10 days after surgery                                                                                                                                                                                                                                                                                                                                                                                      |
| 16 | Yoshida 2015   | 1. Continuous smokers ( <i>n</i> =15)<br>2. Stop smoking 7 to 30 days ( <i>n</i> =28)<br>3. Stop smoking 31 to 90 days ( <i>n</i> =40)<br>4. Stop smoking $\geq 91$ days ( <i>n</i> =102)<br>5. Never smokers ( <i>n</i> =61)                                 | Cessation period included 7 to 30 days, 31 to 90 days, $\geq 91$ days before surgery                                                                                                                                                                                                                                                                                                                                                                                        |
| 17 | Sorensen 2003b | From the second week, they were randomised to<br>1. continuous smokers ( <i>n</i> =16)<br>2. smoking abstinence ( <i>n</i> =32)<br>3. Never smokers ( <i>n</i> =30)                                                                                           | During the first week, smokers smoked 20 filter cigarettes per day. From the second week, they were randomised to continuous smoking (20 cigarettes per day), smoking abstinence with transdermal nicotine patch (15 mg/16 h plus 10 mg/16 h, Nicorette), or smoking abstinence with placebo patch. Each subgroup included 16 patients. In total, each of 4 biopsy wounds were made at 0, 4, 8, and 12 weeks after randomisation to groups, respectively.                   |

|    |                |                                                                                                    |                                                                                                                                                                                                                                                                                                                                                                                                                                                                                                                                                                |
|----|----------------|----------------------------------------------------------------------------------------------------|----------------------------------------------------------------------------------------------------------------------------------------------------------------------------------------------------------------------------------------------------------------------------------------------------------------------------------------------------------------------------------------------------------------------------------------------------------------------------------------------------------------------------------------------------------------|
| 18 | Sorensen 2010  | 1. Never smokers ( $n=30$ )<br>2. continuous smokers ( $n=16$ )<br>3. Abstinent smokers ( $n=32$ ) | During the first week of the study, all smokers smoked 20 standardized filter cigarettes per day.<br>Subsequently, smokers were randomised double-blinded into 3 groups: continued to smoke 20 filter cigarettes per day, refrained from smoking and used a transdermal nicotine patch (TNP) (15 mg/16 h plus 10 mg/16 h, Nicorette) 24 hours a day, and refrained from smoking and used placebo patches. The latter two subgroups belong to abstinent smokers group.                                                                                          |
| 19 | Lindström 2008 | 1. smoking cessation ( $n=48$ )<br>2. continuous smokers ( $n=54$ )                                | The intervention was intended to start 4 weeks before surgery and last 4 weeks after surgery, as described in detail elsewhere. The intervention included weekly meetings or telephone counseling with a nurse professionally trained in smoking cessation therapy, the telephone number to a hot line providing smoking cessation advice, and free nicotine substitution (Nicorette) offered with an individual schedule for the entire intervention period. No bupropion or varenicline was offered. Nicotine replacement therapy was the only drug offered. |

#### S7d. Summary of 19 studies concerning the impacts of preoperative smoking cessation time, NRT, and vaping (part 4)

| No | First author/<br>Publication year | Definition of outcomes                                                                                                                                                                                                                                                | Follow-up<br>mean±SD, range | Description of results and reasons for not including in meta-analysis                                                                                                                                                                                                                                                                                                                                                                                                                                                                                                                                                                                                                                                                  |
|----|-----------------------------------|-----------------------------------------------------------------------------------------------------------------------------------------------------------------------------------------------------------------------------------------------------------------------|-----------------------------|----------------------------------------------------------------------------------------------------------------------------------------------------------------------------------------------------------------------------------------------------------------------------------------------------------------------------------------------------------------------------------------------------------------------------------------------------------------------------------------------------------------------------------------------------------------------------------------------------------------------------------------------------------------------------------------------------------------------------------------|
| 1  | Glassman 2000                     | 1. nonunion was defined strictly based on surgical exploration, hardware failure, computed tomographic (CT) scan with three-dimensional reconstruction, or tomograms. Patients without obvious nonunion based on these criteria were assumed to have adequate fusion. | 49.4 months (> 2 years)     | 1. Nonsmokers vs. continuous smoking before surgery vs. stopping <1 month before surgery vs. stopping >1 month before surgery: nonunion rate<br>For nonunion rate, no significant difference was found between nonsmoker (14.2% [24/169]), continuous smoking (22.2% [14/63]), stopping <1 month (20.2% [15/74]), and stopping >1 month (19.6% [10/51]) ( $P>0.05$ ).<br>2. Nonsmokers vs. continuous smoking after surgery vs. stopping 1–6 months after surgery vs. stopping >6 months after surgery: nonunion rate<br>Nonunion rate was increased in continuous smokers, compared with nonsmokers (14.20% [24/169] vs. 26.47% [18/68], $P=0.025$ ). However, no significant difference was found between other groups ( $P>0.05$ ). |
| 2  | Sørensen 2007                     | 1. Postoperative wound infection was defined as a swollen, red, hot, painful wound with or without pus discharge and postoperative clinical intervention including antibiotics, extensive wound care, or re-operation.                                                | 192 days                    | Standard advised vs. advised and reminder (1 month before surgery) vs. non-advised (continued smokers): postoperative wound infection<br>No significant difference was found between the advised (7% [10/149]) and non-advised (5% [3/64]) cohorts ( $P=0.57$ ) or between the standard (8% [4/48]) and the reminder (6% [6/101]) group ( $P=0.59$ ).                                                                                                                                                                                                                                                                                                                                                                                  |
| 3  | Delaunay 2018                     | 1. Delayed healing (wound dehiscence, epidermolysis, partial or full thickness wound). A delayed healing was decided after 3 weeks' delay.                                                                                                                            | 3 months                    | Nonsmokers vs. active smokers (asked to stop 4 weeks before surgery) vs. former smokers: delayed wound healing rate<br>nonsmoker vs active smoker cessation $P=0.02$<br>active smoker cessation vs former smoker $P=0.92$<br>nonsmoker vs former smoker $P=0.05$<br>However, multivarious analysis showed that difference of delayed healing rate between active smokers who stopped 4 weeks before surgery (1.84[0.89 to 3.78]), former smoker (2.42[0.93 to 6.35]) and nonsmokers were not significant ( $P=0.11$ ).                                                                                                                                                                                                                 |



|   |                |                                                                                                                                                                                                                                                                                                                                                                                                                                                                                                                                                            |                                                           |                                                                                                                                                                                                                                                                                                                                                                                                                                                                                                                                                                                                                                                                                                                                                                                                                                                                                                                                                   |
|---|----------------|------------------------------------------------------------------------------------------------------------------------------------------------------------------------------------------------------------------------------------------------------------------------------------------------------------------------------------------------------------------------------------------------------------------------------------------------------------------------------------------------------------------------------------------------------------|-----------------------------------------------------------|---------------------------------------------------------------------------------------------------------------------------------------------------------------------------------------------------------------------------------------------------------------------------------------------------------------------------------------------------------------------------------------------------------------------------------------------------------------------------------------------------------------------------------------------------------------------------------------------------------------------------------------------------------------------------------------------------------------------------------------------------------------------------------------------------------------------------------------------------------------------------------------------------------------------------------------------------|
| 4 | Padubidri 2001 | NA                                                                                                                                                                                                                                                                                                                                                                                                                                                                                                                                                         | NA (length of stay in hospital was between 1 and 25 days) | Nonsmokers vs. smokers (asked to stop 3 weeks before surgery) vs. ex-smokers (stopped $\geq 3$ weeks): seroma, hematoma, wound infection, wound dehiscence rate<br>For seroma (smokers 5.84% [9/154] vs. ex-smokers 3.95% [3/76] vs. nonsmokers 4.09% [21/514]), hematoma (smokers 1.30% [2/154] vs. ex-smokers 0% [0/76] vs. nonsmokers 2.14% [11/514]), wound infection (smokers 5.19 [8/154] vs. ex-smokers 6.58% [5/76] vs. nonsmokers 4.47% [23/514]), and wound dehiscence rate (smokers 1.95% [3/154] vs. ex-smokers 0% [0/76] vs. nonsmokers 0.78% [4/514]), there was no significant difference between smokers, ex-smokers and nonsmokers ( $P>0.05$ ).                                                                                                                                                                                                                                                                                 |
| 5 | Moller 2002    | NA                                                                                                                                                                                                                                                                                                                                                                                                                                                                                                                                                         | 12 weeks                                                  | Intervention group (stopped 6–8 weeks before surgery) vs. control group (continuous smoking): hematoma, wound infection<br>Hematoma:<br>There was no significant difference between intervention group (1.79% [1/56]) and control group (7.69% [4/52]) ( $P=0.19$ )<br>Infection:<br>Infection rate was significantly decreased in the intervention group (3.57% [2/56]) compared with control group (23.08% [12/52]) ( $P=0.003$ ).                                                                                                                                                                                                                                                                                                                                                                                                                                                                                                              |
| 6 | Araco 2008     | Postoperative infections were defined on the basis of clinical signs (e.g., cellulitis, pain, swelling, drainage, elevation of white blood cells, fever), exudate cultures, superficial infections such as those involving the skin and subcutaneous tissues, and deep infections including muscle and fascia.                                                                                                                                                                                                                                             | 6 months                                                  | Smokers (invited to stop smoking $\geq 4$ weeks before surgery) vs. nonsmokers: infection rate<br>Infection rate of smokers (1.2% [1/42]) significantly increased compared with nonsmokers (14.3% [12/42]) ( $P<0.001$ ).                                                                                                                                                                                                                                                                                                                                                                                                                                                                                                                                                                                                                                                                                                                         |
| 7 | Chan 2006      | Wound healing problems were divided into dehiscence, fat necrosis, infection, and the need for invasive interventions that included wound irrigation, debridement, or secondary procedures. A dehiscence was recorded when a skin gap of more than 1cm <sup>2</sup> was present, whereas an infection was defined when a wound culture was positive or when antibiotic therapy was commenced. It was also noted if there were immediate postsurgical problems. Isolated hematoma and seroma were not considered to be wound-healing problems and excluded. | NA                                                        | Continuous smoking vs. stop smoking $<4$ weeks vs. stop smoking $>4$ weeks vs. nonsmokers: wound healing problem<br>Wound-healing problem:<br>1. Still smoking vs. stopped $<4$ weeks: 67.74% (21/31) vs. 52.63% (10/19), $P=0.29$<br>2. Still smoking vs. stopped $>4$ weeks: 67.74% (21/31) vs. 33.33% (5/15), $P=0.03$<br>3. Still smoking vs. nonsmoker: 67.74% (21/31) vs. 33.65% (35/104), $P=0.001$<br>4. Stopped $<4$ weeks vs. stopped $>4$ weeks: 52.63% (10/19) vs. 33.33% (5/15), $P=0.26$<br>5. Stopped $<4$ weeks vs. nonsmoker: 52.63% (10/19) vs. 33.65% (35/104), $P=0.11$<br>6. Stopped $>4$ weeks vs. nonsmoker: 33.33% (5/15) vs. 33.65% (35/104), $P=0.98$<br>Compared with continuous smoking group, wound-healing problem rate was obviously increased in stopped smoking $>4$ weeks group ( $P=0.03$ ) and nonsmoker group ( $P=0.001$ ). However, no significant difference was found in other comparisons ( $P>0.05$ ). |
| 8 | Gravante 2007  | Postoperative infections were defined on the basis of clinical signs (cellulitis, pain, swelling, drainage, wound dehiscence, elevation of white blood cells, fever) and microbiological cultures.                                                                                                                                                                                                                                                                                                                                                         | NA                                                        | Smokers (asked to stop smoking $\geq 4$ weeks before surgery) vs. non-smokers: infection rate<br>Infection rate of smokers (46.7% [14/30]) was larger than non-smokers (3.3% [1/30]) ( $P=0.0001$ )                                                                                                                                                                                                                                                                                                                                                                                                                                                                                                                                                                                                                                                                                                                                               |
| 9 | Gravante 2008  | Postoperative infections were defined on the basis of clinical signs (cellulitis, pain, swelling, drainage, wound dehiscence, elevation                                                                                                                                                                                                                                                                                                                                                                                                                    | 6 months                                                  | Smokers (instructed to stop smoking $\geq 4$ weeks before surgery) vs. nonsmokers: infection rate<br>Total infection rate of smokers (37.2% [16/43]) was increased compared with nonsmokers                                                                                                                                                                                                                                                                                                                                                                                                                                                                                                                                                                                                                                                                                                                                                       |

|    |              |                                                                                                                                                                                                                                                                  |                            |                                                                                                                                                                                                                                                                                                                                                                                                                                                                                                                                                                                                                                                                                                                                                                                                                                                                                                                                                                                                                                                                                                                                                                                                                                                          |
|----|--------------|------------------------------------------------------------------------------------------------------------------------------------------------------------------------------------------------------------------------------------------------------------------|----------------------------|----------------------------------------------------------------------------------------------------------------------------------------------------------------------------------------------------------------------------------------------------------------------------------------------------------------------------------------------------------------------------------------------------------------------------------------------------------------------------------------------------------------------------------------------------------------------------------------------------------------------------------------------------------------------------------------------------------------------------------------------------------------------------------------------------------------------------------------------------------------------------------------------------------------------------------------------------------------------------------------------------------------------------------------------------------------------------------------------------------------------------------------------------------------------------------------------------------------------------------------------------------|
|    |              | n of white blood cells, fever) and exudate cultures (in cases of wounds dehiscence or drainage).                                                                                                                                                                 |                            | (18.2% [8/44]) ( $P<0.05$ ).<br>However, for superficial infection rate, there was no significant difference between smokers (27.9% [12/43]) and nonsmokers (15.9% [7/44]) ( $P>0.05$ ).<br>For deep infection rate, difference between smokers (5.7% [4/43]) and nonsmokers (9.3% [1/44]) was also not significant ( $P>0.05$ )                                                                                                                                                                                                                                                                                                                                                                                                                                                                                                                                                                                                                                                                                                                                                                                                                                                                                                                         |
| 10 | Herrero 2020 | NA                                                                                                                                                                                                                                                               | 30 days                    | Quit smoking (4-6 weeks before surgery) vs. smoking: infection rate<br>Patients who quit smoking were less likely to experience infection (3.7% [2/80] vs 12.5% [8/120], $P=0.03$ ), than smokers.                                                                                                                                                                                                                                                                                                                                                                                                                                                                                                                                                                                                                                                                                                                                                                                                                                                                                                                                                                                                                                                       |
| 11 | Jung 2014    | Surgical site infections were defined as infections that occur at the surgical site within 30 days after operation, which were categorized into three types (superficial, deep, and organospace) according to the US Centers for Disease Control and Prevention. | median 39 (0 to 46) months | Nonsmokers vs. stop smoking $\geq 8$ weeks before surgery vs. stop smoking 4 to $< 8$ weeks before surgery vs. stop smoking 2 to $< 4$ weeks before surgery vs. stop smoking $< 2$ weeks before surgery; wound complication<br>Wound complication (surgical site infection and wound dehiscence):<br>1. Nonsmoker (1.0% [8/813]) vs. smoking cessation $\geq 8$ weeks (2.6% [5/193]), $P=0.08$<br>2. Nonsmoker vs. smoking cessation 4 to $< 8$ weeks (4.9% [4/82]), $P=0.003$<br>3. Nonsmoker vs. smoking cessation 2 to $< 4$ weeks (2.5% [1/40]), $P=0.36$<br>4. Nonsmoker vs. smoking cessation $< 2$ weeks (5.3% [11/207]), $P<0.001$<br>5. Smoking cessation $\geq 8$ weeks vs. 4 to $< 8$ weeks, $P=0.33$<br>6. Smoking cessation $\geq 8$ weeks vs. 2 to $< 4$ weeks, $P=1.000$<br>7. Smoking cessation $\geq 8$ weeks vs. $< 2$ weeks, $P=0.17$<br>8. Smoking cessation 4 to $< 8$ weeks vs. 2 to $< 4$ weeks, $P=1.000$<br>9. Smoking cessation 4 to $< 8$ weeks vs. $< 2$ weeks, $P=0.88$<br>10. Smoking cessation 2 to $< 4$ weeks vs. $< 2$ weeks, $P=0.45$<br>The study showed that wound complication rate was significantly increased in smoking cessation 4 to $< 8$ weeks and smoking cessation $< 2$ weeks, compared with nonsmokers. |
| 12 | Kuri 2005    | NA                                                                                                                                                                                                                                                               | NA                         | Smokers vs. late quitters (between 8 and 21 days before surgery) vs. intermediate quitters (between 22 and 42 days before surgery) vs. early quitters ( $> 43$ days before surgery) vs. nonsmokers: impaired wound healing<br>Impaired wound healing:<br>1. Smokers (85.7% [24/28]) vs. late quitters (67.6% [23/34]), $P=0.10$<br>2. Smokers vs. intermediate quitters (55.0% [11/20]), $P=0.02$<br>3. Smokers vs. early quitters (59.1% [39/66]), $P=0.01$<br>4. Smokers vs. nonsmokers (47.5% [19/40]), $P=0.001$<br>5. Late quitters vs. intermediate quitters, $P=0.35$<br>6. Late quitters vs. early quitters, $P=0.40$<br>7. Late quitters vs. nonsmokers, $P=0.08$<br>8. Intermediate quitters vs. early quitters, $P=0.75$<br>9. Intermediate quitters vs. nonsmokers, $P=0.58$<br>10. Early quitters vs. nonsmokers, $P=0.25$<br>Compared with smokers, impaired wound healing rate was obviously decreased in the intermediate quitters, early quitters, and nonsmokers.                                                                                                                                                                                                                                                                      |
| 13 | Quan 2019    | NA                                                                                                                                                                                                                                                               | 30 days                    | Nonsmokers vs. stop smoking $\leq 2$ weeks before surgery vs. stop smoking 2 to 4 weeks before surgery vs. stop smoking $\geq 4$ weeks before surgery: infection<br>Surgical site infection:<br>1. Nonsmokers vs. smoking cessation $\leq 2$ weeks, $P=0.25$<br>2. Nonsmokers vs. smoking cessation 2 to 4 weeks, $P=0.36$                                                                                                                                                                                                                                                                                                                                                                                                                                                                                                                                                                                                                                                                                                                                                                                                                                                                                                                               |

|    |                |                                                                                                                                                                                                                                                                                                                              |                                                   |                                                                                                                                                                                                                                                                                                                                                                                                                                                                                                                                                                                                                                                                                                                                                                                                                                                                                                                                                                                                                                    |
|----|----------------|------------------------------------------------------------------------------------------------------------------------------------------------------------------------------------------------------------------------------------------------------------------------------------------------------------------------------|---------------------------------------------------|------------------------------------------------------------------------------------------------------------------------------------------------------------------------------------------------------------------------------------------------------------------------------------------------------------------------------------------------------------------------------------------------------------------------------------------------------------------------------------------------------------------------------------------------------------------------------------------------------------------------------------------------------------------------------------------------------------------------------------------------------------------------------------------------------------------------------------------------------------------------------------------------------------------------------------------------------------------------------------------------------------------------------------|
|    |                |                                                                                                                                                                                                                                                                                                                              |                                                   | <p>3. Nonsmokers vs. smoking cessation <math>\geq 4</math> weeks, <math>P=0.05</math></p> <p>4. Smoking cessation <math>\leq 2</math> weeks vs. smoking cessation 2 to 4 weeks, <math>P=0.27</math></p> <p>5. Smoking cessation <math>\leq 2</math> weeks vs. smoking cessation <math>\geq 4</math> weeks, <math>P=0.27</math></p> <p>6. Smoking cessation 2 to 4 weeks vs. smoking cessation <math>\geq 4</math> weeks, <math>P=0.16</math></p> <p>For surgical site infection rate, there was no significant difference was found between each group.</p>                                                                                                                                                                                                                                                                                                                                                                                                                                                                        |
| 14 | Sorensen 2003a | NA                                                                                                                                                                                                                                                                                                                           | 30 days                                           | <p>Intervention group (asked to stop smoking 2–3 weeks before surgery) vs. control group (continuous smokers): infection rate</p> <p>Wound infection rate:</p> <p>There was no significant difference between intervention group (11% [3/27]) and control group (13% [4/30]) (<math>P=1.00</math>).</p>                                                                                                                                                                                                                                                                                                                                                                                                                                                                                                                                                                                                                                                                                                                            |
| 15 | Thomsen 2010   | NA                                                                                                                                                                                                                                                                                                                           | 12 months                                         | <p>Intervention group (recommended from 2 days before to 10 days after surgery) vs. control group (continuous smokers): infection, any wound complication</p> <p>Wound infection:</p> <p>There was no significant difference between intervention group (14% [8/57]) and control group (13% [8/62]) (<math>P=0.86</math>).</p> <p>Any wound complication:</p> <p>There was also no significant difference between intervention group (44% [25/57]) and control group (45% [28/62]) (<math>P=1.00</math>).</p>                                                                                                                                                                                                                                                                                                                                                                                                                                                                                                                      |
| 16 | Yoshida 2015   | Surgical site infection (SSI) was defined as an infection that occurred within 30 days after surgery in the area of the body affected by surgery and included superficial incisional, deep incisional, and organ/ space SSI                                                                                                  | NA                                                | <p>No cessation (continuous smokers) vs. stop smoking 7 to 30 days before surgery vs. stop smoking 31 to 90 days before surgery vs. stop smoking <math>\geq 91</math> days before surgery vs. never smokers: infection</p> <p>For surgical site infection rate, there was no significant difference between continuous smokers group (33.3% [5/15]), stop smoking 7 to 30 days (32.1% [9/28]), stop smoking 31 to 90 days (22.5% [9/40]), stop smoking <math>\geq 91</math> days (21.6% [22/102]), and never smokers (27.9% [17/61]) (<math>P&gt;0.05</math>).</p>                                                                                                                                                                                                                                                                                                                                                                                                                                                                 |
| 17 | Sorensen 2003b | <p>1. A wound infection was defined according to the National Prevalence Survey study group as purulent discharge with or without wound dehiscence or painful, hot extending erythema indicative of cellulitis</p> <p>2. A wound rupture was defined as a complete separation of wound edges without signs of infection.</p> | 14 weeks (each wound was followed up for 2 weeks) | <p>Continuous smokers vs. smoking abstinence (stopped 0, 4, 8, 12 weeks before surgery) vs. never smokers: wound infection rate and wound rupture rate</p> <p>Wound infection:</p> <p>After 4 weeks of randomisation, wound infections were significantly fewer in the abstinent smoker group (3.45% [1/29]) compared with the group of continuous smokers (25% [4/16]), <math>P=0.047</math>). Similar differences were found after 8 weeks (current smokers vs. abstinent smokers: 20% [3/15] vs. 0% [0/29], <math>P=0.03</math>) and 12 weeks (current smokers vs. abstinent smokers: 16.67% [1/6] vs. 0% [0/29], <math>P=0.03</math>) of randomisation.</p> <p>No significant difference was found in the rest comparisons.</p> <p>Wound rupture:</p> <p>At 4 and 12 weeks, no rupture occurred in the three groups.</p> <p>At 8 weeks, no significant difference was found in nonsmoker (0% [0/6], <math>P=1.00</math>) or ex-smoker (6.90% [2/29], <math>P=1.00</math>), compared with continuous smoker (6.67% [1/15]).</p> |

|    |                |                                                                                                                                                                                                                                                                                                                                                                                                                                                                                                                                                                        |                                                     |                                                                                                                                                                                                                                                                                                                                                                                                                                                                                                                                                                                                                                                                                                                                                                                                                                                                  |
|----|----------------|------------------------------------------------------------------------------------------------------------------------------------------------------------------------------------------------------------------------------------------------------------------------------------------------------------------------------------------------------------------------------------------------------------------------------------------------------------------------------------------------------------------------------------------------------------------------|-----------------------------------------------------|------------------------------------------------------------------------------------------------------------------------------------------------------------------------------------------------------------------------------------------------------------------------------------------------------------------------------------------------------------------------------------------------------------------------------------------------------------------------------------------------------------------------------------------------------------------------------------------------------------------------------------------------------------------------------------------------------------------------------------------------------------------------------------------------------------------------------------------------------------------|
| 18 | Sorensen 2010  | NA                                                                                                                                                                                                                                                                                                                                                                                                                                                                                                                                                                     | 13 weeks<br>(each wound was followed up for 1 week) | <p>Never smokers vs. continuous smokers vs. abstinent smokers (0, 4, 8, 12 weeks before surgery): wound diameter, wound depth</p> <p>The smokers' wounds including continuous and abstinent smokers were smaller and more superficial than the wounds of the never smokers (<math>P&lt;0.01</math>). After smoking cessation, the abstinent smokers' wound diameter remained unchanged compared with the smokers' wounds (<math>P=0.17</math>).</p> <p>The wound depth was not affected after the first 4 weeks of abstinence, but thereafter, the abstinent smoker's wound depth increased (<math>P&lt;0.01</math>). No significant difference in wound depth was found between the abstinent smokers and the never smokers. Also, no significant difference was found between transdermal nicotine patch (TNP) and the placebo group (data not described).</p> |
| 19 | Lindström 2008 | <p>Wound complications Seroma (wound revision, wound drainage or need for repeated wound dressings)</p> <p>Superficial wound infection (infection treated with antibiotics or repeated wound dressings)</p> <p>Deep wound infection (treated with surgical debridement)</p> <p>Hematoma (treated with surgical intervention, blood transfusion, or extra wound checks)</p> <p>Wound dehiscence (redo surgery)</p> <p>Skin necrosis (surgical wound revision or repeated wound checks)</p> <p>Pressure wounds (wound revision or need for repeated wound dressings)</p> | 30 days                                             | <p>Smoking cessation 4 weeks before surgery vs. continuous smokers</p> <p>hematoma:<br/>smoking cessation 4 weeks (6% [3/48] vs. 13% [7/54], <math>P=0.33</math>)</p> <p>Wound infection:<br/>Smoking cessation 4 weeks (4% [2/48] vs. 7% [4/54], <math>P=0.68</math>)</p> <p>Seroma:<br/>Smoking cessation 4 weeks (6% [3/48] vs. 9% [5/54], <math>P=0.72</math>)</p>                                                                                                                                                                                                                                                                                                                                                                                                                                                                                           |

Note: NA: not available.

## Appendix S8. Risk of bias for 58 studies included in the meta-analyses of the impacts of smoking and alcohol consumption

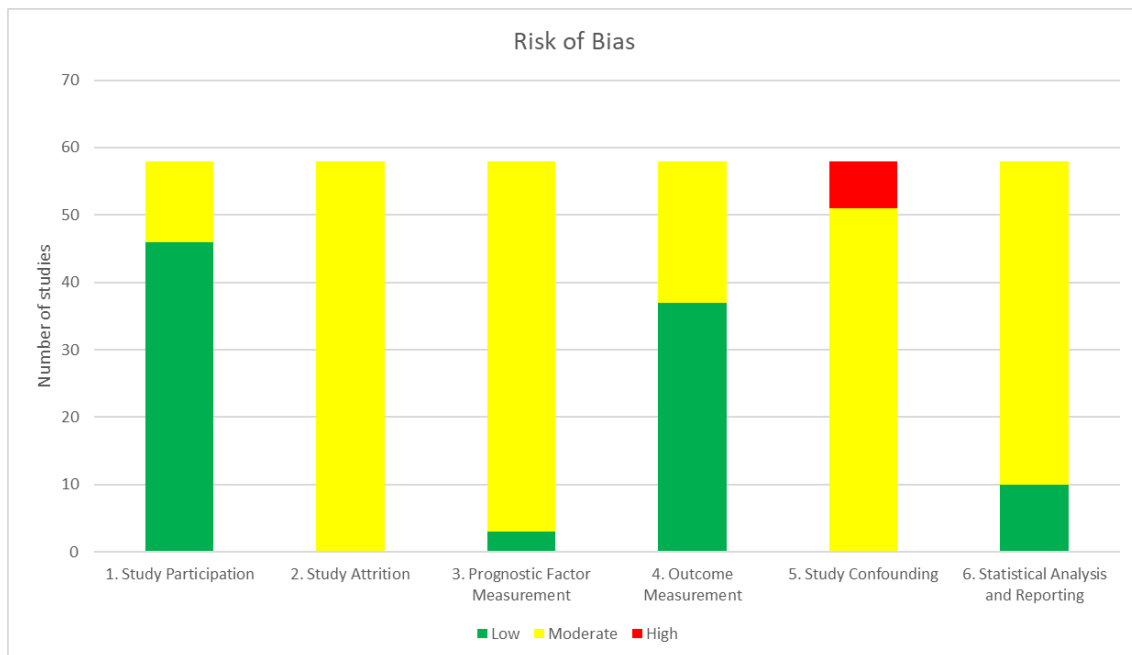

- (1) In the study participation domain, 46 studies (79%) exhibited a low risk of bias, and the remaining 12 studies exhibited a moderate risk of bias (21%).
- (2) All of the 58 (100%) studies were graded as having a moderate risk of bias in the study attrition domain.
- (3) All but three of the low-risk-of-bias studies exhibited a moderate risk of bias in the prognostic fact or measurement domain.
- (4) In the outcome measurement domain, 37 (64%) studies exhibited a low risk of bias, and 21 (36%) of the studies exhibited a moderate risk of bias.
- (5) All except seven high-risk studies exhibited a moderate risk of bias in the study confounding domain.
- (6) In the statistical analysis and reporting domain, 10 studies were rated as having a low risk of bias, and 48 studies (83%) were rated as having a moderate risk of bias.

**Appendix S9. List of studies about the impacts of smoking and alcohol consumption on fracture healing and surgical site infection**

| Comparison                        | Outcomes                            | No. of studies with sample size                | No. of studies without sample size |
|-----------------------------------|-------------------------------------|------------------------------------------------|------------------------------------|
| Smokers vs. non-smokers           | delayed union                       | 3[1,4,20]                                      | -                                  |
|                                   | nonunion                            | 18[1,3-5,11,19,20,22-27,29,32,33,37,54]        | -                                  |
|                                   | time to union                       | 2[1,51]                                        | -                                  |
|                                   | superficial surgical site infection | 4[4,29,42,47]                                  | -                                  |
|                                   | deep surgical site infection        | 17[4,9,10,19,21,24,29-31,34,37,42,47-49,52,53] | -                                  |
|                                   | undefined surgical site infection   | 18[2,12-15,17,18,35,38-41,43-46,50,57]         | 1[7]                               |
|                                   | normal union                        | 5[1,4,20,28,36]                                | -                                  |
| alcohol drinkers vs. non-drinkers | nonunion                            | 3[3,5,11]                                      | -                                  |
|                                   | time to union                       | 1[1]                                           | -                                  |
|                                   | deep surgical site infection        | 2[6,8]                                         | -                                  |
|                                   | undefined surgical site infection   | 8[2,12,15,16,50,55-57]                         | 1[7]                               |

**Appendix S10. Data of the studies comparing nonunion between smokers and non-smokers**

| No | Study            | nonunion in smokers                | total smokers | nonunion in non-smokers | total non-smokers | Time point for diagnosis of nonunion after injury/surgery |
|----|------------------|------------------------------------|---------------|-------------------------|-------------------|-----------------------------------------------------------|
| 1  | Askew 2011       | 2                                  | 21            | 2                       | 9                 | 6 months after surgery                                    |
| 2  | Blair 2016       | 7                                  | 48            | 9                       | 136               | 9 months                                                  |
| 3  | Bone 1997        | 3                                  | 18            | 8                       | 29                | 6 months                                                  |
| 4  | Chu 2018         | OR 3.90,<br>95%CI (0.61–<br>25.21) | 24            | NA                      | 96                | 6 months after surgery                                    |
| 5  | Ding 2014        | 11                                 | 165           | 13                      | 494               | 9 months after injury                                     |
| 6  | Donohue 2016     | 17                                 | 109           | 17                      | 219               | NA                                                        |
| 7  | Enninghorst 2011 | 15                                 | 23            | 39                      | 66                | 6 months                                                  |
| 8  | Haller 2019      | 22                                 | 118           | 50                      | 400               | 9 months                                                  |
| 9  | Kent 2015        | 9                                  | 12            | 21                      | 28                | 6 months                                                  |
| 10 | Kim 2018         | 4                                  | 5             | 17                      | 68                | 6 months after surgery                                    |
| 11 | Kuklo 2008       | 6                                  | 14            | 15                      | 115               | 12 months after surgery                                   |
| 12 | Liu 2015         | 30                                 | 155           | 66                      | 649               | 6 months after injury                                     |
| 13 | Moghaddam 2011   | 9                                  | 46            | 0                       | 39                | 6 months                                                  |
| 14 | Murray 2013      | 73                                 | 219           | 52                      | 722               | 6 months after injury                                     |
| 15 | Ozbek 2017       | 14                                 | 19            | 24                      | 56                | 12 months after surgery                                   |
| 16 | Subramanyam 2021 | 3                                  | 4             | 3                       | 96                | 6 months after injury                                     |
| 17 | Thorud 2017      | 25                                 | 55            | 21                      | 85                | 6 months after injury                                     |
| 18 | Zumsteg 2014     | 12                                 | 63            | 17                      | 137               | 6 months                                                  |
| 19 | Olson 2020b      | OR 1.9,<br>95%CI (0.7–<br>5.0)     | 75            | NA                      | 89                | 6 months                                                  |

Note: OR: odds ratio; NA: not available.

## Appendix S11. Forest plot of meta-analysis of nonunion rate of alcohol drinkers vs. non-drinkers

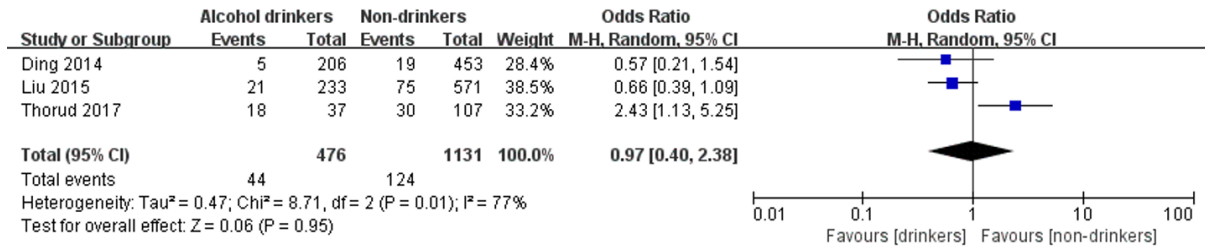



## Appendix S12. Forest plots of the meta-analyses of secondary outcomes of smokers vs. non-smokers

Forest plots of the meta-analyses of S12a) undefined surgical site infection rate and S12b) normal union rate of smokers vs. non-smokers

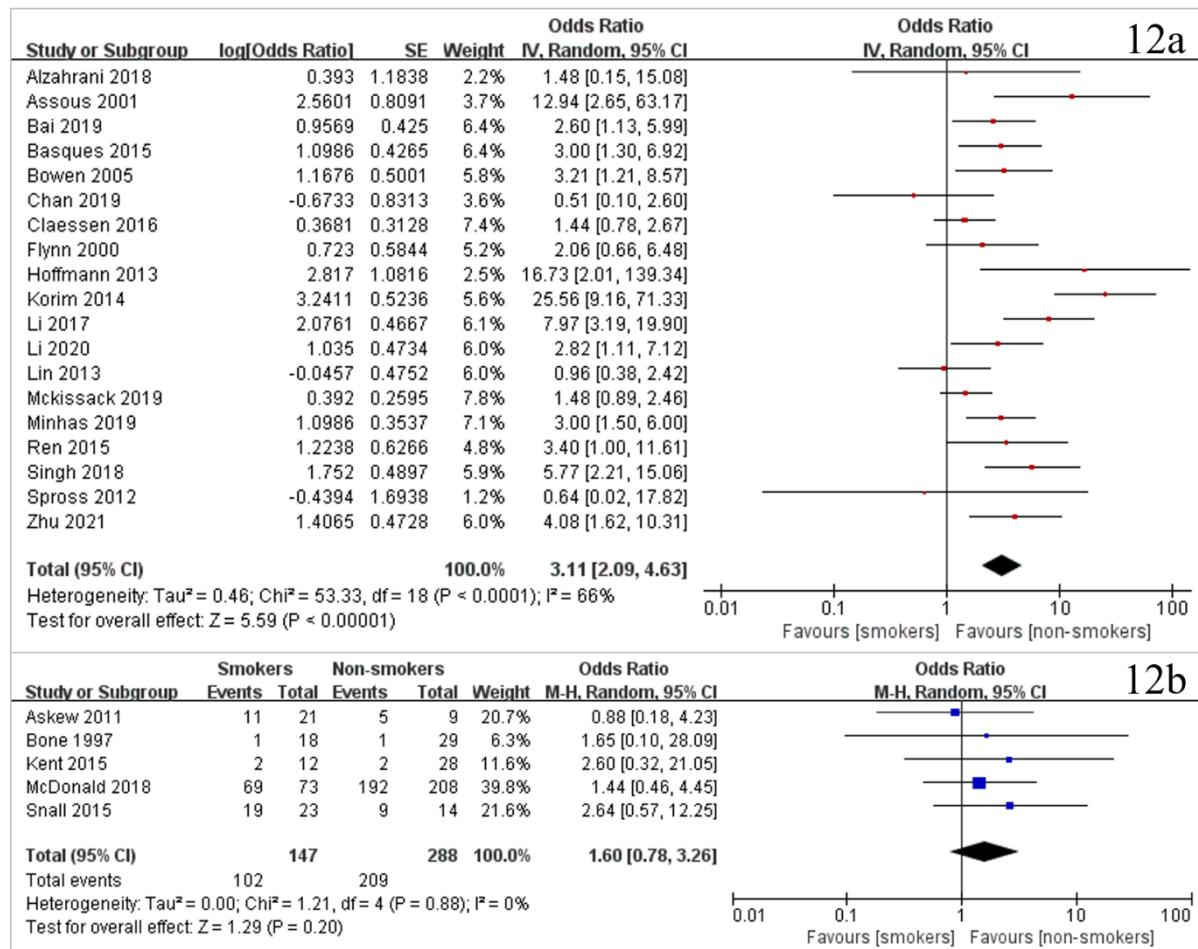

### Appendix S13. Forest plots of the meta-analyses of secondary outcomes of alcohol drinkers vs. non-drinkers

Forest plots of meta-analyses of S13a) deep surgical site infection rate and S13b) undefined surgical site infection rate of alcohol drinkers vs. non-drinkers

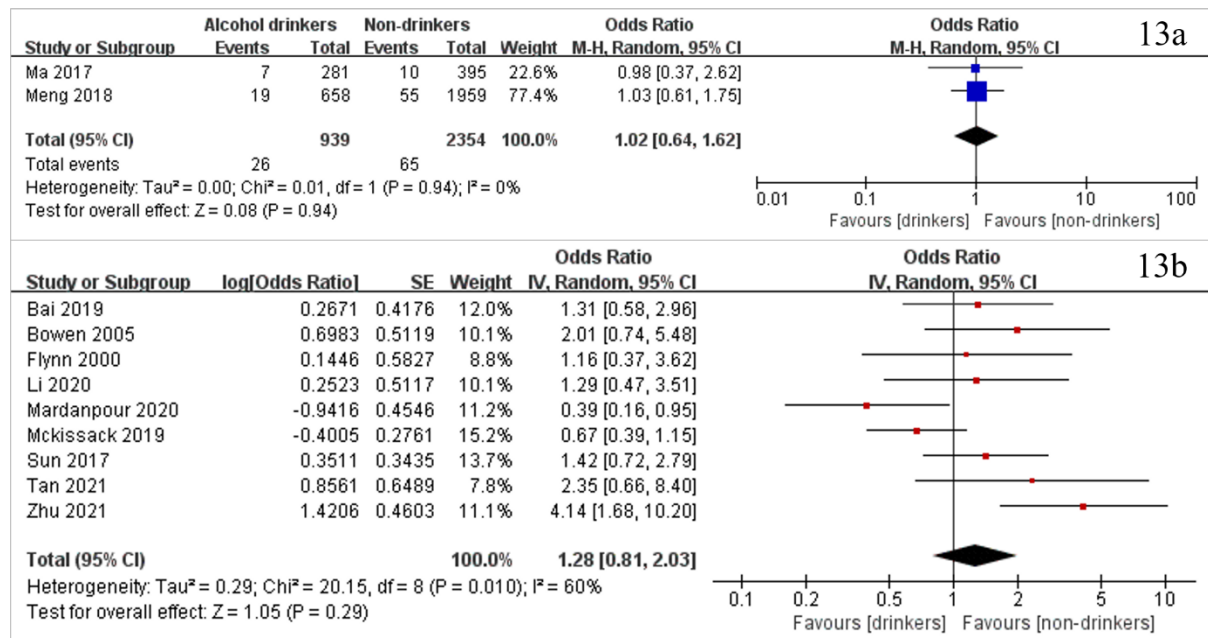

## Appendix S14. List of the studies and the results of the impacts of preoperative smoking cessation time, NRT, and vaping

### S14a. List of the studies and the results about the impacts of smoking cessation time on bone healing, wound healing, and wound complications

| Outcomes                                                     | Preoperative cessation time                            | Smoking cessation vs. continuous smokers | Smoking cessation vs. non smokers      |
|--------------------------------------------------------------|--------------------------------------------------------|------------------------------------------|----------------------------------------|
| Bone healing                                                 | <1 month,<br>>1 month                                  | 1 study[104]                             |                                        |
|                                                              | 1 to 6 months,<br>>6 months post-operatively           |                                          |                                        |
| Impaired wound healing                                       | >3 weeks                                               | -                                        | 2 studies[106,115]                     |
|                                                              | ≥4 weeks                                               | 1 study[115]                             | 2 studies[106,115]                     |
| Wound infection                                              | 2 days before to 10 days after surgery                 | 1 study[118]                             | -                                      |
|                                                              | 2 to 3 weeks                                           | 1 study[117]                             | -                                      |
|                                                              | ≥3 weeks                                               | -                                        | 7 studies[107,109,111,112,116,119,120] |
|                                                              | ≥4 weeks                                               | 6 studies[105,108,113,119,120,122]       | 6 studies[109,111,112,116,119,120]     |
|                                                              | ≥6 weeks                                               | 3 studies[108,119,120]                   | -                                      |
|                                                              | ≥8 weeks                                               | 2 studies[119,120]                       |                                        |
|                                                              | ≥12 weeks                                              |                                          |                                        |
| Wound hematoma                                               | 3 weeks                                                | -                                        | 1 study[107]                           |
|                                                              | 4 weeks                                                | 1 study[122]                             |                                        |
|                                                              | 6 to 8 weeks                                           | 1 study[108]                             |                                        |
| Dehiscence                                                   | 3 weeks                                                | -                                        | 1 study[107]                           |
| Seroma                                                       | 3 weeks                                                | -                                        | 1 study[107]                           |
|                                                              | 4 weeks                                                | 1 study[122]                             | -                                      |
| Wound infection plus dehiscence                              | <2 weeks<br>2 to <4 weeks<br>4 to <8 weeks<br>≥8 weeks | -                                        | 1 study[114]                           |
| Wound healing problems (dehiscence, fat necrosis, infection) | <4 weeks<br>>4 weeks                                   | -                                        | 1 study[110]                           |

One study including 357 patients showed that compared with continued smokers (22.2%) or non-smokers (14.2%), the cessation of smoking at less than one month (20.2%) or more than one month (19.6%) before surgery, did not significantly change the bone nonunion rate after spinal fusion surgery.[104] The results of the study also showed that postoperative smoking cessation for one to six months (18.2%) or for more than six months (17.1%) did not change the nonunion rate, compared with continuous smokers (26.5%) or non-smokers (14.2%).

One study also showed that compared with continuous smokers, smoking cessation for between three and six weeks (55.0% vs. 85.7%,  $P=0.02$ ) and for more than six weeks (59.1% vs. 85.7%,  $P=0.01$ ) significantly reduced the impaired wound healing rate.[115]

However, one study[118] with 130 patients and another study[117] with 57 patients showed that no statistically significant difference was found in the comparison of smoking cessation for two days before surgery vs. continuous smokers (14% vs. 13%, respectively;  $P=0.86$ ) and smoking cessation for between two and three weeks vs. continuous smokers (11% vs. 13%, respectively;  $P=1.00$ ).

For other wound complications, one study including 748 patients showed that no significant difference was found in dehiscence or seroma between smoking cessation for three weeks before surgery and non-smokers.[107] Another study with 108 patients also showed that smoking cessation for six to eight weeks before surgery did not significantly reduce the hematoma rate, compared with continuous smokers.[108] One study[110] with 169 patients and another study[114] with 1,335 patients showed that smoking cessation for four weeks or more significantly reduced the combination of wound complications, compared with continuous smokers, whereas there was no significant difference compared with non-smokers.

**S14b. List of studies and results about the impact of NRT and vaping on bone healing and wound complication**

| Outcomes        | NRT                                                                                                       | NRT vs. continuous smokers |
|-----------------|-----------------------------------------------------------------------------------------------------------|----------------------------|
| Wound infection | NRT (unknown in detail)                                                                                   | 1 study[117]               |
|                 | NRT as a partially way to quit smoking                                                                    | 1 study[113]               |
|                 | Nicorette chewing gum as a partially way to quit smoking                                                  | 1 study[122]               |
|                 | Nicorette patch, nicorette chewing gum, nicorette resorbible, nicorette inhalat, or nicorette nasal spray | 1 study[105]               |

Note: NRT: nicotine replacement therapy

In two studies, NRT did not significantly reduce wound infection, compared with continued smokers.[105,117] In two studies, NRT was used as a part of the smoking cessation methods.[113,122] The results of wound infection were inconsistent (3.7% vs. 12.5%,  $P=0.03$ ; 4% vs. 7%,  $P=0.68$ ). However, the cessation methods were different from each other.[113,122] In addition, no study concerning vaping that met inclusion and exclusion criteria was found.

**Appendix S15. Forest plots of the meta-analyses of 15a) impaired wound healing rate of smoking cessation vs. non-smokers and 15b) hematoma rate of smoking cessation vs. continuous smokers**

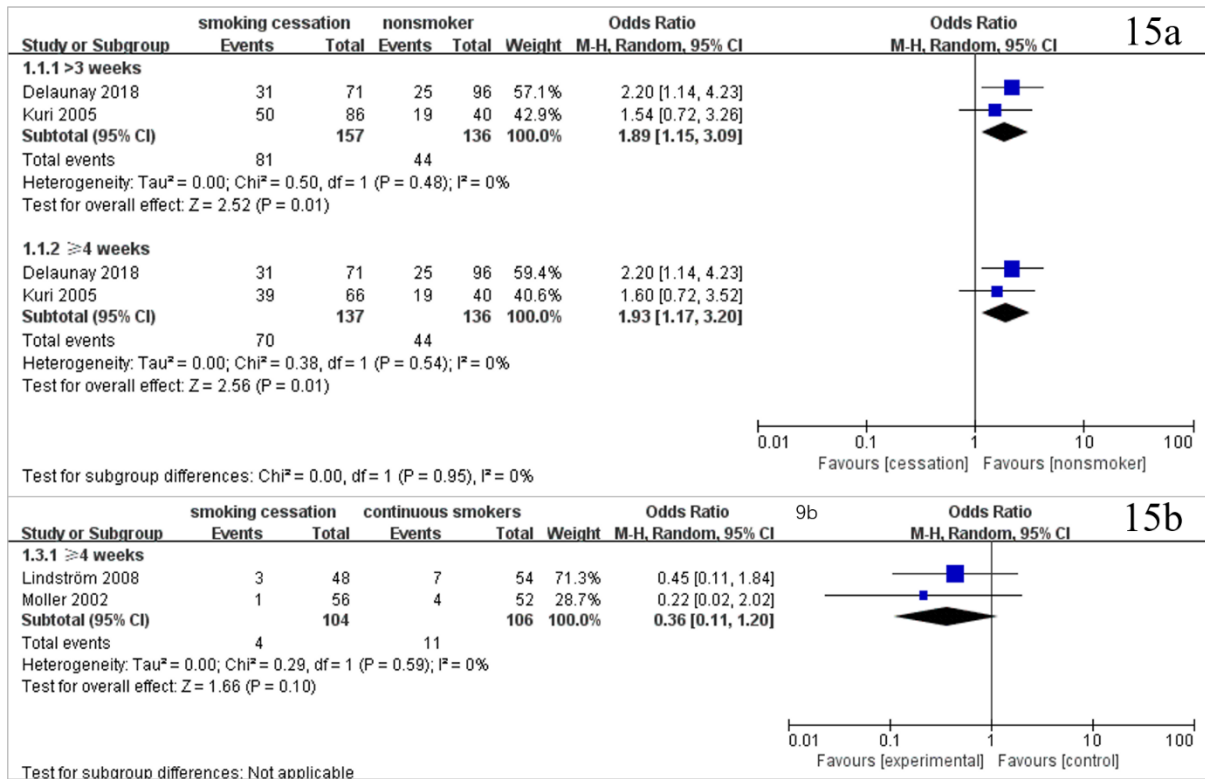

## Appendix S16. Funnel plots and Rucker's test for publication bias

Funnel plots of the meta-analyses of S16a) nonunion rate, S16b) deep surgical site infection (DSSI) rate, and S16c) undefined surgical site infection (SSI) rate of smokers vs. non-smokers

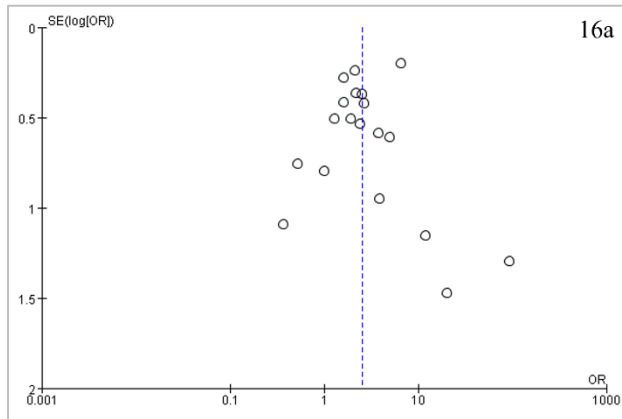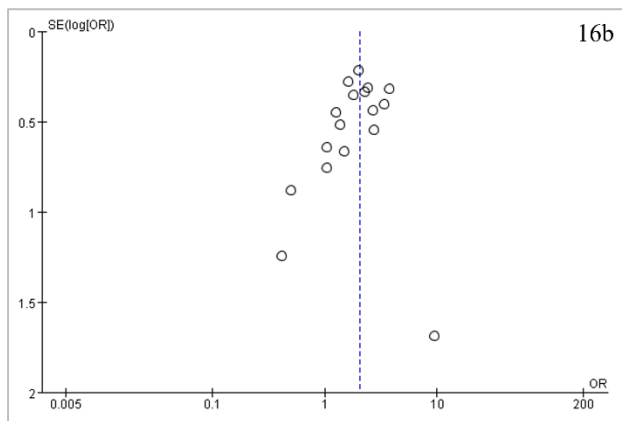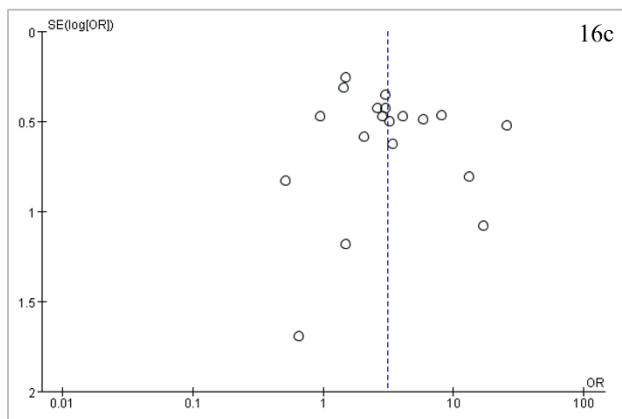

### Appendix S16d. Rucker's test for publication bias

| Outcomes      | <i>t</i> value | <i>P</i> value | bias  | se.bias | intercept |
|---------------|----------------|----------------|-------|---------|-----------|
| Nonunion      | -0.41          | 0.69           | -0.33 | 0.80    | 1.13      |
| DSSI          | -1.41          | 0.18           | -0.79 | 0.56    | 1.01      |
| Undefined SSI | 1.17           | 0.26           | 1.23  | 1.05    | 0.46      |

## **Appendix S17. Results of the dose-related analysis of outcomes**

When regarding the time to union, only one study[1] investigated alcohol drinkers who drank more than 28 g/day and non-drinkers. The results showed that the time to union in drinkers was significantly longer than that in non-drinkers (OR 12.85, 95% CI [1.23–24.47],  $P=0.03$ ,  $I^2=NA$ ). For undefined SSI, three studies[15,38,46] compared the effects of smoking more than 10 cigarettes/day, and one of the three studies[15] compared the effect of smoking more than 20 cigarettes/day with non-smokers. The results indicated that patients who had smoked more than 10 cigarettes/day were associated with an obviously larger undefined SSI rate (OR 4.93, 95% CI [1.36–17.89],  $P=0.02$ ,  $I^2=33\%$ ). However, no significant difference was found between smokers who had smoked 20 cigarettes/day and non-smokers (OR 3.86, 95% CI [1.00–14.96],  $P=0.05$ ,  $I^2=NA$ ). Moreover, one study[15] compared undefined SSI between patients who drank more than 28 g/day and non-drinkers. However, no significant difference was found between the two groups (OR 2.79, 95% CI [0.77–10.08],  $P=0.12$ ,  $I^2=NA$ ).

## 1 Appendix S18. Results of the subgroup analysis

2 The results showed that the difference in the nonunion rate between smokers and non-smokers was not significant in studies where (1) age  $\geq 60$ -years-old (two studies with 103 patients,[1,26] odds ratio [OR] 2.06, 95% CI [0.07–62.65],  $P=0.68$ ,  $I^2=79\%$ ); (2) diabetes  $\geq 20\%$  (two studies with 217 patients,[11,26] OR 3.76, 95% CI [1.00–14.12],  $P=0.05$ ,  $I^2=39\%$ ); and (3) sample size  $\leq 100$  individuals (eight studies with 538 patients,[1,4,20,24,26,29,33,54] OR 2.64, 95% CI [0.93–7.55],  $P=0.07$ ,  $I^2=68\%$ ). For a comparison of drinkers vs. non-drinkers, the difference in the nonunion rate was not significant in studies in which (1) body mass index (BMI)  $>30$  kg/m<sup>2</sup> (one study with 144 patients,[11] OR 2.43, 95% CI [1.13–5.25],  $P=0.02$ ,  $I^2=NA$ ), (2) diabetes  $\geq 20\%$  (one study with 144 patients,[11] OR 2.43, 95% CI [1.13–5.25],  $P=0.02$ ,  $I^2=NA$ ), and (3) sample size of between 101 and 300 individuals (one study with 144 patients,[1] OR 2.43, 95% CI [1.13–5.25],  $P=0.02$ ,  $I^2=NA$ ).

9

10 Deep infection rate was no different in studies with (1) percentage of females  $\geq 50\%$  (two studies[4,47], OR 1.03, 95% CI [0.47–2.27],  $P=0.93$ ,  $I^2=0\%$ ); (2) mean or median ages  $\geq 60$ -years-old (one study[49], OR 1.04, 95% CI [0.24–4.61],  $P=0.95$ ,  $I^2=NA$ ); (3) mean or median BMI  $<25$  kg/m<sup>2</sup> (two studies[4,9,52], OR 1.25, 95% CI [0.54–2.89],  $P=0.60$ ,  $I^2=0\%$ ) and BMI  $>30$  kg/m<sup>2</sup> (one study[47], OR 1.25, 95% CI [0.52–3.04],  $P=0.62$ ,  $I^2=NA$ ); and (4) sample size  $\leq 100$  individuals (four studies[4,24,29,42], OR 0.89, 95% CI [0.36–2.19],  $P=0.80$ ,  $I^2=0\%$ ) and sample size between 701 and 1,000 individuals (one study[47], OR 1.25, 95% CI [0.52–3.04],  $P=0.62$ ,  $I^2=NA$ ). In addition, for undefined infection rate, the significant difference disappeared in studies with (1) percentage of females  $\geq 50\%$  (six studies[13,14,18,39,46,98], OR 1.86, 95% CI [1.01–3.43],  $P=0.05$ ,  $I^2=44\%$ ); (2) mean or median ages  $\geq 60$ -years-old (one study[46], OR 0.64, 95% CI [0.02–17.82],  $P=0.80$ ,  $I^2=NA$ ); and (3) sample size  $\leq 100$  individuals (three studies[15,38,46], OR 3.42, 95% CI [0.74–15.77],  $P=0.12$ ,  $I^2=55\%$ ) and sample size  $>1,000$  individuals (two studies[14,43], OR 2.04, 95% CI [1.00–4.18],  $P=0.05$ ,  $I^2=58\%$ ). However, for the remaining outcome s, no obvious differences were found when the studies were divided into subgroups.

19

20 For a comparison of drinkers vs. non-drinkers, a significant difference in nonunion rate was shown in studies (1) in which mean or median BMI  $>30$  kg/m<sup>2</sup> (one study[11], OR 2.43, 95% CI [1.13–5.25],  $P=0.02$ ,  $I^2=NA$ ); (2) percentage of diabetes  $\geq 20\%$  (one study[11], OR 2.43, 95% CI [1.13–5.25],  $P=0.02$ ,  $I^2=NA$ ); and (3) sample size between 101 and 300 individuals (one study[11], OR 2.43, 95% CI [1.13–5.25],  $P=0.02$ ,  $I^2=NA$ ). A significant difference was found in undefined SSI in studies with (1) BMI between 25 to 30 kg/m<sup>2</sup> (one study,[57] OR 4.14, 95% CI [1.68–10.20],  $P=0.002$ ,  $I^2=NA$ ); (2) percentage of diabetes  $<20\%$  (five studies,[2,12,16,50,56] OR 1.52, 95% CI [1.02–2.27],  $P=0.04$ ,  $I^2=0\%$ ); and (3) sample size between 301 and 500 individuals (one study,[57] OR 4.14, 95% CI [1.68–10.20],  $P=0.002$ ,  $I^2=NA$ ).

|               | Smokers vs. Non-smokers |                       |             |                  |                                   |          | Alcohol drinkers vs. Non-drinkers |             |          |                                   |  |
|---------------|-------------------------|-----------------------|-------------|------------------|-----------------------------------|----------|-----------------------------------|-------------|----------|-----------------------------------|--|
|               | <i>n</i>                | <i>I</i> <sup>2</sup> | OR [95% CI] | <i>p</i>         | <i>p</i> for subgroup differences | <i>n</i> | <i>I</i> <sup>2</sup>             | OR [95% CI] | <i>p</i> | <i>p</i> for subgroup differences |  |
| Delayed union |                         |                       |             |                  |                                   |          |                                   |             |          |                                   |  |
| Female%       |                         |                       |             |                  |                                   |          |                                   |             |          |                                   |  |
|               | $<50\%$                 | 2                     | 0%          | 1.76 (0.60–5.23) | 0.31                              | 0.26     | -                                 | -           | -        | -                                 |  |
|               | $\geq 50\%$             | 1                     | -           | 0.42 (0.04–4.02) | 0.45                              | -        | -                                 | -           | -        | -                                 |  |



|                             |                    |    |     |                   |             |      |   |     |                  |             |       |
|-----------------------------|--------------------|----|-----|-------------------|-------------|------|---|-----|------------------|-------------|-------|
| Age                         | <60                | 2  | 0%  | 1.11 (0.34–3.56)  | 0.86        | 0.54 | - | -   | -                | -           | -     |
|                             | ≥60                | 1  | -   | 2.15 (0.36–13.05) | 0.40        |      | - | -   | -                | -           |       |
| Diabetes%                   | <20%               | 1  | -   | 0.42 (0.04–4.02)  | 0.45        |      | - | -   | -                | -           | -     |
|                             | ≥20%               | 0  | -   | -                 | -           |      | - | -   | -                | -           | -     |
| Sample size                 | ≤100               | 3  | 0%  | 1.35 (0.51–3.59)  | 0.55        |      | - | -   | -                | -           | -     |
|                             | 101–300            | 0  | -   | -                 | -           |      | - | -   | -                | -           | -     |
|                             | 301–500            | 0  | -   | -                 | -           |      | - | -   | -                | -           | -     |
|                             | 501–700            | 0  | -   | -                 | -           |      | - | -   | -                | -           | -     |
|                             | 701–1000           | 0  | -   | -                 | -           |      | - | -   | -                | -           | -     |
|                             | >1000              | 0  | -   | -                 | -           |      | - | -   | -                | -           | -     |
| Confounders adjusted or not | Adjusted           | 0  | -   | -                 | -           |      | - | -   | -                | -           | -     |
|                             | Not adjusted       | 3  | 0%  | 1.35 (0.51–3.59)  | 0.55        |      | - | -   | -                | -           | -     |
| Study design                | RCT                | 0  | -   | -                 | -           |      | - | -   | -                | -           | -     |
|                             | cohort study       | 3  | 0%  | 1.35 (0.51–3.59)  | 0.55        |      | - | -   | -                | -           | -     |
|                             | case-control study | 0  | -   | -                 | -           |      | - | -   | -                | -           | -     |
| Nonunion                    |                    |    |     |                   |             |      |   |     |                  |             |       |
| Female%                     | <50%               | 14 | 69% | 2.67 (1.64–4.35)  | <0.0001     | 0.61 | 1 | -   | 0.57 (0.21–1.54) | 0.27        | 0.36  |
|                             | ≥50%               | 4  | 9%  | 2.25 (1.47–3.46)  | 0.0002      |      | 2 | 87% | 1.22 (0.34–4.41) | 0.76        |       |
| Age                         | <60                | 16 | 65% | 2.62 (1.78–3.84)  | <0.0001     | 0.89 | 3 | 77% | 0.97 (0.40–2.38) | 0.95        | -     |
|                             | ≥60                | 2  | 79% | 2.06 (0.07–62.65) | <b>0.68</b> |      | 0 | -   | -                | -           | -     |
| BMI                         | <25                | 1  | -   | 2.12 (1.32–3.40)  | 0.002       | 0.37 | 1 | -   | 0.66 (0.39–1.09) | 0.10        | 0.005 |
|                             | 25–30              | 2  | 0%  | 4.75 (1.70–13.23) | 0.003       |      | 0 | -   | -                | -           | -     |
|                             | >30                | 2  | 0%  | 2.30 (1.28–4.13)  | 0.005       |      | 1 | -   | 2.43 (1.13–5.25) | <b>0.02</b> |       |
| Diabetes%                   | <20%               | 10 | 39% | 2.37 (1.54–3.65)  | <0.0001     | 0.52 | 1 | -   | 0.57 (0.21–1.54) | 0.27        | 0.02  |

|                             |                    |    |     |                      |             |      |   |     |                    |             |      |
|-----------------------------|--------------------|----|-----|----------------------|-------------|------|---|-----|--------------------|-------------|------|
|                             | ≥20%               | 2  | 39% | 3.76 (1.00–14.12)    | <b>0.05</b> |      | 1 | -   | 2.43 (1.13–5.25)   | <b>0.02</b> |      |
|                             | ≤100               | 8  | 68% | 2.64 (0.93–7.55)     | <b>0.07</b> | 0.81 | 0 | -   | -                  | -           | 0.01 |
| Sample size                 | 101–300            | 6  | 0%  | 2.37 (1.59–3.53)     | <0.0001     |      | 1 | NA  | 2.43 (1.13–5.25)   | <b>0.02</b> |      |
|                             | 301–500            | 1  | NA  | 2.20 (1.07–4.49)     | 0.03        |      | 0 | -   | -                  | -           |      |
|                             | 501–700            | 2  | 0%  | 1.87 (1.18–2.96)     | 0.007       |      | 1 | NA  | 0.57 (0.21–1.54)   | 0.27        |      |
|                             | 701–1000           | 2  | 92% | 3.72 (1.25–11.07)    | 0.02        |      | 1 | NA  | 0.66 (0.39–1.09)   | 0.10        |      |
|                             | >1000              | 0  | -   | -                    | -           |      | 0 | -   | -                  | -           |      |
| Confounders adjusted or not | Adjusted           | 4  | 0%  | 2.71 (1.52–4.85)     | 0.0008      | 0.74 | 0 | -   | -                  | -           | -    |
|                             | Not adjusted       | 15 | 70% | 2.40 (1.56–3.69)     | <0.0001     |      | 3 | 77% | 0.97 (0.40–2.38)   | 0.95        |      |
| Study design                | RCT                | 0  | -   | -                    | -           | 0.56 | 0 | -   | -                  | -           | -    |
|                             | cohort study       | 9  | 36% | 2.19 (1.25–3.84)     | 0.006       |      | 0 | -   | -                  | -           |      |
|                             | case-control study | 10 | 75% | 2.73 (1.68–4.46)     | <0.0001     |      | 3 | 77% | 0.97 (0.40–2.38)   | 0.95        |      |
| Time to union               |                    |    |     |                      |             |      |   |     |                    |             |      |
| Female%                     | <50%               | 2  | 0%  | 0.52 (-1.29–2.33)    | 0.57        | -    | 1 | -   | 12.85 (1.23–24.47) | 0.03        | -    |
|                             | ≥50%               | 0  | -   | -                    | -           |      | 0 | -   | -                  | -           |      |
| Age                         | <60                | 1  | -   | 0.58 (-1.25–2.41)    | 0.53        | 0.65 | 0 | -   | -                  | -           | -    |
|                             | ≥60                | 1  | -   | -2.45 (-15.33–10.43) | 0.71        |      | 1 | -   | 12.85 (1.23–24.47) | 0.03        |      |
| Diabetes%                   | <20%               | 1  | -   | 0.58 (-1.25–2.41)    | 0.53        | -    | - | -   | -                  | -           | -    |
|                             | ≥20%               | 0  | -   | -                    | -           |      | - | -   | -                  | -           |      |
| Sample size                 | ≤100               | 2  | 0%  | 0.52 (-1.29–2.33)    | 0.57        | -    | 1 | -   | 12.85 (1.23–24.47) | 0.03        | -    |
|                             | 101–300            | 0  | -   | -                    | -           |      | 0 | -   | -                  | -           |      |
|                             | 301–500            | 0  | -   | -                    | -           |      | 0 | -   | -                  | -           |      |
|                             | 501–700            | 0  | -   | -                    | -           |      | 0 | -   | -                  | -           |      |
|                             | 701–1000           | 0  | -   | -                    | -           |      | 0 | -   | -                  | -           |      |

|                             |                    |   |    |                      |      |      |   |   |                    |      |
|-----------------------------|--------------------|---|----|----------------------|------|------|---|---|--------------------|------|
|                             | >1000              | 0 | -  | -                    | -    | -    | 0 | - | -                  | -    |
| Confounders adjusted or not | Adjusted           | 0 | -  | -                    | -    | -    | 0 | - | -                  | -    |
|                             | Not adjusted       | 2 | 0% | 0.52 (-1.29-2.33)    | 0.57 |      | 1 | - | 12.85 (1.23-24.47) | 0.03 |
| Study design                | RCT                | 0 | -  | -                    | -    | -    | 0 | - | -                  | -    |
|                             | cohort study       | 1 | -  | -2.45 (-15.33-10.43) | 0.71 |      | 1 | - | 12.85 (1.23-24.47) | 0.03 |
|                             | case-control study | 0 | -  | -                    | -    | -    | 0 | - | -                  | -    |
| Normal union                |                    |   |    |                      |      |      |   |   |                    |      |
| Female%                     | <50%               | 3 | 0% | 1.56 (0.56-4.33)     | 0.40 | 0.94 | - | - | -                  | -    |
|                             | ≥50%               | 2 | 0% | 1.64 (0.61-4.44)     | 0.33 |      | - | - | -                  | -    |
| Age                         | <60                | 4 | 0% | 1.87 (0.84-4.16)     | 0.13 | 0.40 | - | - | -                  | -    |
|                             | ≥60                | 1 | -  | 0.88 (0.18-4.23)     | 0.87 |      | - | - | -                  | -    |
| BMI                         | <25                | 0 | -  | -                    | -    | -    | - | - | -                  | -    |
|                             | 25-30              | 1 | -  | 1.44 (0.46-4.45)     | 0.53 |      | - | - | -                  | -    |
|                             | >30                | 0 | -  | -                    | -    | -    | - | - | -                  | -    |
| Diabetes%                   | <20%               | 2 | 0% | 1.64 (0.61-4.44)     | 0.62 | -    | - | - | -                  | -    |
|                             | ≥20%               | 0 | -  | -                    | -    |      | - | - | -                  | -    |
| Sample size                 | ≤100               | 4 | 0% | 1.72 (0.69-4.31)     | 0.25 | 0.81 | - | - | -                  | -    |
|                             | 101-300            | 1 | -  | 1.44 (0.46-4.45)     | 0.53 |      | - | - | -                  | -    |
|                             | 301-500            | 0 | -  | -                    | -    |      | - | - | -                  | -    |
|                             | 501-700            | 0 | -  | -                    | -    |      | - | - | -                  | -    |
|                             | 701-1000           | 0 | -  | -                    | -    |      | - | - | -                  | -    |
|                             | >1000              | 0 | -  | -                    | -    |      | - | - | -                  | -    |
| Confounders adjusted or not | Adjusted           | 0 | -  | -                    | -    | -    | - | - | -                  | -    |
|                             | Not adjusted       | 5 | 0% | 1.60 (0.78-3.26)     | 0.20 |      | - | - | -                  | -    |

|                             |                    |   |    |                   |      |      |   |   |   |   |   |
|-----------------------------|--------------------|---|----|-------------------|------|------|---|---|---|---|---|
| Study design                | RCT                | 1 | -  | 2.64 (0.57-12.25) | 0.22 | 0.77 | - | - | - | - | - |
|                             | cohort study       | 3 | 0% | 1.35 (0.43-4.26)  | 0.61 |      | - | - | - | - |   |
|                             | case-control study | 1 | -  | 1.44 (0.46-4.45)  | 0.53 |      | - | - | - | - |   |
| SSSI                        |                    |   |    |                   |      |      |   |   |   |   |   |
| Female%                     | <50%               | 2 | 0% | 1.48 (0.37-5.91)  | 0.58 | 0.82 | - | - | - | - | - |
|                             | ≥50%               | 2 | 0% | 1.24 (0.68-2.25)  | 0.48 |      | - | - | - | - |   |
| Age                         | <60                | 4 | 0% | 1.27 (0.73-2.21)  | 0.39 |      | - | - | - | - | - |
|                             | ≥60                | 0 | -  | -                 | -    |      | - | - | - | - |   |
| BMI                         | <25                | 0 | -  | -                 | -    |      | - | - | - | - | - |
|                             | 25-30              | 0 | -  | -                 | -    |      | - | - | - | - |   |
|                             | >30                | 1 | -  | 1.20 (0.65-2.22)  | 0.56 |      | - | - | - | - |   |
| Diabetes%                   | <20%               | 4 | 0% | 1.27 (0.73-2.21)  | 0.39 |      | - | - | - | - | - |
|                             | ≥20%               | 0 | -  | -                 | -    |      | - | - | - | - |   |
| Sample size                 | ≤100               | 3 | 0% | 1.63 (0.47-5.66)  | 0.44 | 0.67 | - | - | - | - | - |
|                             | 101-300            | 0 | -  | -                 | -    |      | - | - | - | - |   |
|                             | 301-500            | 0 | -  | -                 | -    |      | - | - | - | - |   |
|                             | 501-700            | 0 | -  | -                 | -    |      | - | - | - | - |   |
|                             | 701-1000           | 1 | -  | 1.20 (0.65-2.22)  | 0.56 |      | - | - | - | - |   |
|                             | >1000              | 0 | -  | -                 | -    |      | - | - | - | - |   |
| Confounders adjusted or not | Adjusted           | 1 | -  | 1.20 (0.65-2.22)  | 0.56 | 0.67 | - | - | - | - | - |
|                             | Not adjusted       | 3 | 0% | 1.63 (0.47-5.66)  | 0.44 |      | - | - | - | - |   |
| Study design                | RCT                | 0 | -  | -                 | -    |      | - | - | - | - | - |
|                             | cohort study       | 3 | 0% | 1.26 (0.71-2.26)  | 0.43 |      | - | - | - | - |   |
|                             | case-control study | 0 | -  | -                 | -    |      | - | - | - | - |   |

| DSSI                        |                    |    |     |                  |             |      |   |     |                  |      |      |  |
|-----------------------------|--------------------|----|-----|------------------|-------------|------|---|-----|------------------|------|------|--|
| Female%                     | <50%               | 13 | 0%  | 2.02 (1.63–2.50) | <0.0001     | 0.11 | 2 | 0%  | 1.02 (0.64–1.62) | 0.94 | -    |  |
|                             | ≥50%               | 2  | 0%  | 1.03 (0.47–2.27) | 0.93        |      | 0 | -   | -                | -    | -    |  |
| Age                         | <60                | 13 | 0%  | 1.96 (1.58–2.44) | <0.0001     | 0.41 | 2 | 0%  | 1.02 (0.64–1.62) | 0.94 | -    |  |
|                             | ≥60                | 1  | -   | 1.04 (0.24–4.61) | 0.95        |      | 0 | -   | -                | -    | -    |  |
| BMI                         | <25                | 2  | 0%  | 1.25 (0.54–2.89) | 0.60        | 0.34 | 1 | -   | 1.03 (0.61–1.75) | 0.91 | 0.94 |  |
|                             | 25–30              | 2  | 0%  | 2.12 (1.49–3.02) | <0.0001     |      | 1 | -   | 0.98 (0.37–2.62) | 0.97 |      |  |
|                             | >30                | 1  | -   | 1.25 (0.52–3.04) | 0.62        |      | 0 | -   | -                | -    | -    |  |
| Diabetes%                   | <20%               | 15 | 4%  | 2.05 (1.67–2.52) | <0.0001     | -    | 2 | 0%  | 1.02 (0.64–1.62) | 0.94 | -    |  |
|                             | ≥20%               | 0  | -   | -                | -           |      | 0 | -   | -                | -    | -    |  |
| Sample size                 | ≤100               | 4  | 0%  | 0.89 (0.36–2.19) | <b>0.80</b> | 0.14 | 0 | -   | -                | -    | 0.94 |  |
|                             | 101–300            | 5  | 0%  | 2.63 (1.77–3.91) | <0.0001     |      | 0 | -   | -                | -    | -    |  |
|                             | 301–500            | 3  | 0%  | 2.17 (1.49–3.17) | <0.0001     |      | 0 | -   | -                | -    | -    |  |
|                             | 501–700            | 3  | 0%  | 1.80 (1.29–2.50) | 0.0005      |      | 1 | -   | 0.98 (0.37–2.62) | 0.97 |      |  |
|                             | 701–1000           | 1  | -   | 1.25 (0.52–3.04) | <b>0.62</b> |      | 0 | -   | -                | -    | -    |  |
|                             | >1000              | 1  | -   | 3.40 (1.53–7.56) | 0.003       |      | 1 | -   | 1.03 (0.61–1.75) | 0.91 |      |  |
| Confounders adjusted or not | Adjusted           | 4  | 0%  | 1.92 (1.39–2.64) | <0.0001     | 0.67 | 0 | -   | -                | -    | -    |  |
|                             | Not adjusted       | 13 | 12% | 2.10 (1.60–2.75) | <0.0001     |      | 2 | 0%  | 1.02 (0.64–1.62) | 0.94 |      |  |
| Study design                | RCT                | 0  | -   | -                | -           | 0.82 | 0 | -   | -                | -    | -    |  |
|                             | cohort study       | 7  | 23% | 2.09 (1.38–3.17) | 0.0005      |      | 0 | -   | -                | -    | -    |  |
|                             | case-control study | 9  | 0%  | 1.98 (1.56–2.50) | <0.0001     |      | 2 | 0%  | 1.02 (0.64–1.62) | 0.94 |      |  |
| Undefined SSI               |                    |    |     |                  |             |      |   |     |                  |      |      |  |
| Female%                     | <50%               | 10 | 32% | 3.06 (2.12–4.43) | <0.0001     | 0.33 | 8 | 53% | 1.44 (0.89–2.32) | 0.14 | -    |  |
|                             | ≥50%               | 5  | 55% | 1.93 (0.82–4.55) | <b>0.13</b> |      | 0 | -   | -                | -    | -    |  |

|                             |                    |    |     |                    |             |       |   |     |                   |              |      |
|-----------------------------|--------------------|----|-----|--------------------|-------------|-------|---|-----|-------------------|--------------|------|
| Age                         | <60                | 15 | 69% | 3.44 (2.11–5.60)   | <0.0001     | 0.33  | 8 | 53% | 1.44 (0.89–2.32)  | 0.14         | -    |
|                             | ≥60                | 1  | -   | 0.64 (0.02–17.82)  | <b>0.80</b> |       | 0 | -   | -                 | -            | -    |
| BMI                         | <25                | 0  | -   | -                  | -           | -     | 1 | -   | 1.42 (0.72–2.79)  | 0.31         | -    |
|                             | 25–30              | 4  | 60% | 2.98 (1.12–7.95)   | 0.03        |       | 1 | -   | 4.14 (1.68–10.20) | <b>0.002</b> |      |
|                             | >30                | 0  | -   | -                  | -           |       | 0 | -   | -                 | -            |      |
| Diabetes%                   | <20%               | 12 | 74% | 3.44 (1.98–5.98)   | <0.0001     | 0.43  | 5 | 0%  | 1.52 (1.02–2.27)  | 0.04         | 0.54 |
|                             | ≥20%               | 2  | 0%  | 3.11 (1.52–6.40)   | 0.002       |       | 2 | 66% | 2.30 (0.66–8.00)  | 0.19         |      |
| Sample size                 | ≤100               | 3  | 55% | 3.42 (0.74–15.77)  | <b>0.12</b> | 0.001 | 1 | -   | 1.16 (0.37–3.62)  | 0.80         | 0.96 |
|                             | 101–300            | 7  | 58% | 2.44 (1.19–5.04)   | 0.02        |       | 2 | 0%  | 1.61 (0.79–3.27)  | 0.19         |      |
|                             | 301–500            | 2  | 2%  | 5.73 (2.97–11.04)  | <0.0001     |       | 1 | -   | 4.14 (1.68–10.20) | 0.002        |      |
|                             | 501–700            | 3  | 0%  | 2.90 (1.70–4.93)   | <0.0001     |       | 1 | -   | 1.31 (0.58–2.96)  | 0.52         |      |
|                             | 701–1000           | 1  | -   | 25.56 (9.16–71.33) | <0.0001     |       | 2 | 81% | 0.90 (0.16–5.24)  | 0.91         |      |
|                             | >1000              | 2  | 58% | 2.04 (1.00–4.18)   | <b>0.05</b> |       | 1 | -   | 1.42 (0.72–2.79)  | 0.31         |      |
| Confounders adjusted or not | Adjusted           | 5  | 5%  | 2.59 (1.70–3.93)   | <0.0001     | 0.36  | 4 | 63% | 1.18 (0.51–2.74)  | 0.71         | 0.78 |
|                             | Not adjusted       | 14 | 73% | 3.55 (2.07–6.09)   | <0.0001     |       | 5 | 67% | 1.37 (0.75–2.50)  | 0.31         |      |
| Study design                | RCT                | 0  | -   | -                  | -           | 0.37  | 0 | -   | -                 | -            | 0.12 |
|                             | cohort study       | 7  | 20% | 2.23 (1.45–3.44)   | 0.0003      |       | 3 | 0%  | 0.82 (0.53–1.28)  | 0.39         |      |
|                             | case-control study | 11 | 75% | 3.24 (1.85–5.69)   | <0.0001     |       | 6 | 66% | 1.51 (0.81–2.83)  | 0.20         |      |

1 Note: OR: odds ratio; CI: confidence interval; RCT: randomised controlled trial; BMI: body mass index; SSSI: superficial surgical site infection; DSSI: deep  
2 surgical site infection; SSI: surgical site infection.

3 The subgroup analyses showed that the impact of smoking on increasing rates of nonunion, DSSI, and undefined SSI was not obvious in elderly patients and  
4 studies with small sample sizes. For diabetic patients, smoking did not have an obvious impact on nonunion. Moreover, there was no significant impact of  
5 smoking on infection in female patients. In addition, smoking also had no impact on DSSI in normal weight and obese patients, as well as in studies with  
6 sample sizes of 701 to 1,000 individuals. For undefined SSI, smoking had no impact in studies with sample sizes over 1,000 individuals. However, due to  
7 the small number of studies that were included in these subgroups, this result requires more clinical studies to verify its stability. This was the same study in  
8 which drinking had a negative effect on nonunion in diabetic and obese patients, as well as the study with a small sample size. In addition, drinking had

1 a negative impact on undefined SSI in overweight patients, non-diabetic patients, and studies with 301 to 500 patients. These results also require more resea  
2 rch to verify.

1 **Appendix S19. Results of the sensitivity analysis**

2 We also conducted a sensitivity analysis for the outcomes to identify potential heterogeneity. The results of the sensitivity analysis showed that the nonunion  
 3 rate was not different between smokers and non-smokers in one study[11] including 144 patients with a low risk of bias in the prognostic factor measureme  
 4 nt domain (odds ratio [OR] 2.43, 95% CI [1.13–5.25],  $P=0.02$ ) and two studies[22,58] including 284 patients with a low risk of bias in the statistical analy  
 5 sis and reporting domain (OR 2.23, 95% CI [0.93–5.38],  $P=0.07$ ). For the comparison between alcohol drinkers and non-drinkers, the difference in the nonu  
 6 nion rate became significant in one study[11] with a low risk of bias in the prognostic factor measurement domain (OR 2.43, 95% CI [1.13–5.25],  $P=0.02$ ).

7

8 We found that two studies[15,46] investigating undefined SSI (OR 1.82, 95% CI [0.62–5.38],  $P=0.28$ ,  $I^2=0\%$ ), which had a low risk of bias in the progn  
 9 ostic factor measurement domain, were possible causes of heterogeneity. One study[22] that evaluated the effects of smoking on nonunion (OR 3.90, 95% CI  
 10 [0.61–24.94],  $P=0.15$ ,  $I^2=NA$ ) could also be a reason for the heterogeneity because of the low risk of bias in the statistical analysis and reporting domain.  
 11 In addition, two studies[4,49] investigating DSSI (OR 0.76, 95% CI [0.25–2.35],  $P=0.64$ ,  $I^2=0\%$ ) may be possible causes of heterogeneity because of a clear  
 12 description of non-pathological fracture. The remaining factors did not show obvious causes of heterogeneity.

13

14 For the comparison of alcohol drinkers vs. non-drinkers, we found that one study[11] investigating the nonunion rate (OR 1.02, 95% CI [1.13–5.25],  $P=$   
 15  $0.02$ ,  $I^2=NA$ ), which had a low risk of bias in the prognostic factor measurement domain, was a possible cause of heterogeneity. Six studies[2,12,15,50,56,5  
 16 7] investigating the impact of alcohol consumption on undefined SSI (OR 1.84, 95% CI [1.23–2.77],  $P=0.003$ ,  $I^2=1\%$ ), which had a low risk of bias in the  
 17 outcome measurement domain, were possible causes of heterogeneity.

18

|                                  | Smokers vs. Non-smokers |       |                  |         | Alcohol drinkers vs. Non-drinkers |       |                  |      |
|----------------------------------|-------------------------|-------|------------------|---------|-----------------------------------|-------|------------------|------|
|                                  | No. of studies          | $I^2$ | OR (95% CI)      | $p$     | No. of studies                    | $I^2$ | OR (95% CI)      | $p$  |
| 1. Studies without fund assisted |                         |       |                  |         |                                   |       |                  |      |
| Delayed union rate               | 2                       | 0%    | 1.11 (0.34–3.56) | 0.86    | -                                 | -     | -                | -    |
| Nonunion rate                    | 15                      | 64%   | 2.55 (1.71–3.81) | <0.0001 | 3                                 | 77%   | 0.97 (0.40–2.38) | 0.95 |
| Normal union rate                | 4                       | 0%    | 1.87 (0.84–4.16) | 0.13    | -                                 | -     | -                | -    |
| Time to union                    | -                       | -     | -                | -       | -                                 | -     | -                | -    |
| SSSI                             | 3                       | 0%    | 1.25 (0.71–2.20) | 0.43    | -                                 | -     | -                | -    |



|                                                             |    |     |                      |             |   |     |                    |              |
|-------------------------------------------------------------|----|-----|----------------------|-------------|---|-----|--------------------|--------------|
| DSSI                                                        | 13 | 8%  | 2.13 (1.67–2.71)     | <0.0001     | 1 | -   | 1.03 (0.61–1.75)   | 0.91         |
| Undefined SSI                                               | 15 | 71% | 3.33 (1.98–5.60)     | <0.0001     | 5 | 25% | 1.12 (0.75–1.67)   | 0.58         |
| 2. Studies with low risk_study Participation                |    |     |                      |             |   |     |                    |              |
| Delayed union rate                                          | 2  | 19% | 1.10 (0.23–5.36)     | 0.90        | - | -   | -                  | -            |
| Nonunion rate                                               | 15 | 53% | 2.75 (1.92–3.95)     | <0.0001     | 3 | 77% | 0.97 (0.40–2.38)   | 0.95         |
| Normal union rate                                           | 3  | 0%  | 1.37 (0.59–3.18)     | 0.46        | - | -   | -                  | -            |
| Time to union                                               | 2  | 0%  | 0.52 (-1.29–2.33)    | 0.57        | 1 | -   | 12.85 (1.23–24.47) | 0.03         |
| SSSI                                                        | 3  | 0%  | 1.26 (0.71–2.26)     | 0.43        | - | -   | -                  | -            |
| DSSI                                                        | 12 | 0%  | 1.91 (1.52–2.40)     | <0.0001     | 2 | 0%  | 1.02 (0.64–1.62)   | 0.94         |
| Undefined SSI                                               | 16 | 65% | 3.20 (2.10–4.88)     | <0.0001     | 8 | 53% | 1.44 (0.89–2.32)   | 0.14         |
| 3. Studies with low risk_prognostic Factor Measurement      |    |     |                      |             |   |     |                    |              |
| Nonunion rate                                               | 1  | -   | 2.15 (0.88–5.23)     | <b>0.09</b> | 1 | -   | 2.43 (1.13–5.25)   | <b>0.02</b>  |
| Undefined SSI                                               | 2  | 0%  | 1.82 (0.62–5.38)     | <b>0.28</b> | 1 | -   | 1.16 (0.37–3.62)   | 0.80         |
| 4. Studies with low risk_outcome Measurement                |    |     |                      |             |   |     |                    |              |
| Delayed union rate                                          | 1  | -   | 2.15 (0.36–13.05)    | 0.40        | - | -   | -                  | -            |
| Nonunion rate                                               | 13 | 70% | 2.72 (1.76–4.22)     | <0.0001     | 3 | 77% | 0.97 (0.40–2.38)   | 0.95         |
| Normal union rate                                           | 1  | -   | 0.88 (0.18–4.23)     | 0.87        | - | -   | -                  | -            |
| Time to union                                               | 1  | -   | -2.45 (-15.33–10.43) | 0.71        | 1 | -   | 12.85 (1.23–24.47) | 0.03         |
| SSSI                                                        | 1  | -   | 1.20 (0.65–2.22)     | 0.56        | - | -   | -                  | -            |
| DSSI                                                        | 9  | 0%  | 1.97 (1.57–2.48)     | <0.0001     | 2 | 0%  | 1.02 (0.64–1.62)   | 0.94         |
| Undefined SSI                                               | 14 | 67% | 3.63 (2.32–5.67)     | <0.0001     | 6 | 1%  | 1.84 (1.23–2.77)   | <b>0.003</b> |
| 5. Studies with low risk_statistical Analysis and Reporting |    |     |                      |             |   |     |                    |              |
| Nonunion rate                                               | 2  | 0%  | 2.23 (0.93–5.38)     | <b>0.07</b> | - | -   | -                  | -            |
| SSSI                                                        | 1  | -   | 1.20 (0.65–2.22)     | 0.56        | - | -   | -                  | -            |

|                                                       |    |     |                      |         |   |     |                    |             |
|-------------------------------------------------------|----|-----|----------------------|---------|---|-----|--------------------|-------------|
| DSSI                                                  | 4  | 0%  | 1.92 (1.39–2.64)     | <0.0001 | - | -   | -                  | -           |
| Undefined SSI                                         | 4  | 37% | 2.12 (1.18–3.82)     | 0.01    | 2 | 0%  | 2.14 (0.97–4.70)   | <b>0.06</b> |
| <b>6. Studies without mandible and spine fracture</b> |    |     |                      |         |   |     |                    |             |
| Delayed union rate                                    | 3  | 0%  | 1.35 (0.51–3.59)     | 0.55    | - | -   | -                  | -           |
| Nonunion rate                                         | 18 | 65% | 2.45 (1.67–3.59)     | <0.0001 | 3 | 77% | 0.97 (0.40–2.38)   | 0.95        |
| Normal union rate                                     | 4  | 0%  | 1.39 (0.62–3.12)     | 0.42    | - | -   | -                  | -           |
| Time to union                                         | 2  | 0%  | 0.52 (-1.29–2.33)    | 0.57    | - | -   | -                  | -           |
| SSSI                                                  | 4  | 0%  | 1.27 (0.73–2.21)     | 0.39    | - | -   | -                  | -           |
| DSSI                                                  | 16 | 1%  | 2.07 (1.70–2.52)     | <0.0001 | 2 | 0%  | 1.02 (0.64–1.62)   | 0.94        |
| Undefined SSI                                         | 19 | 66% | 3.11 (2.09–4.63)     | <0.0001 | 9 | 60% | 1.28 (0.81–2.03)   | 0.29        |
| <b>7. Studies with fractures in single location</b>   |    |     |                      |         |   |     |                    |             |
| Delayed union rate                                    | 3  | 0%  | 1.35 (0.51–3.59)     | 0.55    | - | -   | -                  | -           |
| Nonunion rate                                         | 17 | 67% | 2.47 (1.63–3.74)     | <0.0001 | 3 | 77% | 0.97 (0.40–2.38)   | 0.95        |
| Normal union rate                                     | 5  | 0%  | 1.60 (0.78–3.26)     | 0.20    | - | -   | -                  | -           |
| Time to union                                         | 2  | 0%  | 0.52 (-1.29–2.33)    | 0.57    | 1 | -   | 12.85 (1.23–24.47) | 0.03        |
| SSSI                                                  | 3  | 0%  | 1.26 (0.71–2.26)     | 0.43    | - | -   | -                  | -           |
| DSSI                                                  | 14 | 10% | 2.06 (1.62–2.62)     | <0.0001 | - | -   | -                  | -           |
| Undefined SSI                                         | 15 | 69% | 3.15 (2.00–4.97)     | <0.0001 | 7 | 39% | 1.00 (0.66–1.51)   | 1.00        |
| <b>8. Studies without case series</b>                 |    |     |                      |         |   |     |                    |             |
| Delayed union rate                                    | 3  | 0%  | 1.35 (0.51–3.59)     | 0.55    | - | -   | -                  | -           |
| Nonunion rate                                         | 19 | 64% | 2.50 (1.73–3.61)     | <0.0001 | 3 | 77% | 0.97 (0.40–2.38)   | 0.95        |
| Normal union rate                                     | 5  | 0%  | 1.60 (0.78–3.26)     | 0.20    | - | -   | -                  | -           |
| Time to union                                         | 1  | -   | -2.45 (-15.33–10.43) | 0.71    | 1 | -   | 12.85 (1.23–24.47) | 0.03        |
| SSSI                                                  | 3  | 0%  | 1.26 (0.71–2.26)     | 0.43    | - | -   | -                  | -           |

|                                                                                                                                                                |    |     |                      |         |   |     |                    |      |
|----------------------------------------------------------------------------------------------------------------------------------------------------------------|----|-----|----------------------|---------|---|-----|--------------------|------|
| DSSI                                                                                                                                                           | 16 | 1%  | 2.03 (1.67–2.47)     | <0.0001 | 2 | 0%  | 1.02 (0.64–1.62)   | 0.94 |
| Undefined SSI                                                                                                                                                  | 18 | 66% | 2.94 (1.98–4.38)     | <0.0001 | 9 | 60% | 1.28 (0.81–2.03)   | 0.29 |
| 9. Studies with non-pathological fractures                                                                                                                     |    |     |                      |         |   |     |                    |      |
| Delayed union rate                                                                                                                                             | 2  | 19% | 1.10 (0.23–5.36)     | 0.90    | - | -   | -                  | -    |
| Nonunion rate                                                                                                                                                  | 10 | 70% | 3.03 (1.76–5.22)     | <0.0001 | 3 | 77% | 0.97 (0.40–2.38)   | 0.95 |
| Normal union rate                                                                                                                                              | 3  | 0%  | 1.37 (0.59–3.18)     | 0.46    | - | -   | -                  | -    |
| Time to union                                                                                                                                                  | 1  | -   | -2.45 (-15.33–10.43) | 0.71    | 1 | -   | 12.85 (1.23–24.47) | 0.03 |
| SSSI                                                                                                                                                           | 1  | -   | 2.45 (0.14–42.82)    | 0.54    | - | -   | -                  | -    |
| DSSI                                                                                                                                                           | 2  | 0%  | 0.76 (0.25–2.35)     | 0.64    | 2 | 0%  | 1.02 (0.64–1.62)   | 0.94 |
| Undefined SSI                                                                                                                                                  | 6  | 3%  | 3.73 (2.37–5.87)     | <0.0001 | 6 | 66% | 1.51 (0.81–2.83)   | 0.20 |
| 10. Studies with operative treatment                                                                                                                           |    |     |                      |         |   |     |                    |      |
| Delayed union rate                                                                                                                                             | 1  | -   | 0.42 (0.04–4.02)     | 0.45    | - | -   | -                  | -    |
| Nonunion rate                                                                                                                                                  | 9  | 43% | 2.90 (1.76–4.79)     | <0.0001 | 1 | -   | 0.57 (0.21–1.54)   | 0.27 |
| Normal union rate                                                                                                                                              | 3  | 0%  | 2.07 (0.80–5.41)     | 0.14    | - | -   | -                  | -    |
| Time to union                                                                                                                                                  | 1  | -   | 0.58 (-1.25–2.41)    | 0.53    | - | -   | -                  | -    |
| SSSI                                                                                                                                                           | 3  | 0%  | 1.25 (0.71–2.20)     | 0.43    | - | -   | -                  | -    |
| DSSI                                                                                                                                                           | 13 | 7%  | 2.11 (1.67–2.65)     | <0.0001 | 2 | 0%  | 1.02 (0.64–1.62)   | 0.94 |
| Undefined SSI                                                                                                                                                  | 17 | 70% | 3.19 (2.05–4.96)     | <0.0001 | 7 | 68% | 1.23 (0.71–2.15)   | 0.46 |
| 11. Removing one study at a time for outcomes with high heterogeneity                                                                                          |    |     |                      |         |   |     |                    |      |
| Nonunion rate excluding Ding 2014                                                                                                                              |    |     |                      |         | 2 | 87% | 1.22 (0.34–4.41)   | 0.76 |
| Nonunion rate excluding Liu 2015                                                                                                                               |    |     |                      |         | 2 | 81% | 1.22 (0.29–5.09)   | 0.79 |
| Nonunion rate excluding Thorud 2017                                                                                                                            |    |     |                      |         | 2 | 0%  | 0.64 (0.40–1.00)   | 0.05 |
| 12. Removing three studies with high OR for smoking and nonunion as reviewer suggested (Kim 2018, OR 12; Moghaddam 2011, OR 20.01; Subramanyam 2021, OR 93.00) |    |     |                      |         |   |     |                    |      |

|               |    |     |                  |         |
|---------------|----|-----|------------------|---------|
| Nonunion rate | 16 | 61% | 2.22 (1.57–3.14) | <0.0001 |
|---------------|----|-----|------------------|---------|

1 Note: OR: odds ratio; SSSI: superficial surgical site infection; DSSI: deep surgical site infection; SSI: surgical site infection.

2 The sensitivity analysis showed that studies with a low risk of bias in the prognostic factor measurement domain, outcome measurement domain, and statisti  
3 cal analysis and reporting domain changed the trend of the results regarding nonunion and undefined SSI. This change may be because the number of studie  
4 s that met the sensitivity analysis was only one or two studies, which indicates that more studies with a low risk of bias in these two domains are needed  
5 to verify the results. High heterogeneity was found in quantitative synthesis for the impact of alcohol consumption on nonunion rate. After removing one stu  
6 dy at a time for nonunion rate, we found that although the impact of alcohol consumption on nonunion rate was still not significant, the heterogeneity signi  
7 ficantly decreased after the study Throrud 2017 was removed (OR 0.97, 95% CI [0.40–2.38],  $I^2=77%$  to OR 0.64, 95% CI [0.40–1.00],  $I^2=0%$ ). Therefore,  
8 Thorud 2017 may lead to the heterogeneity. The possible reasons for this heterogeneity might be (1) the included sample size is small ( $n=144$ ) and (2) the  
9 expanded definition of nonunion, that not only included fractures that failed to union after 6 months after fracture diagnosis, but also included fractures that  
10 failed to meet criteria with correctional surgery before 6 months after fracture diagnosis. The authors in the Thorud 2017 did not describe what "failure to  
11 meet criteria with correctional surgery before 6 months after fracture diagnosis" meant. We thought this might mean that the radiographic results show that t  
12 he fracture alignment is not satisfactory within 6 months after fracture diagnosis, which might lead to reoperation and increase the number of final nonunion  
13 cases. For the impact of smoking on nonunion, three studies with high ORs (Kim 2018, Moghaddam 2011, and Subramanyam 2021) were included in the m  
14 eta-analysis. The high ORs of the three studies may be due to the small sample size (Kim 2018,  $n=73$ ; Moghaddam 2011,  $n=85$ ; Subramanyam 2021,  $n=10$   
15 0). We conducted a sensitivity analysis by removing these three studies to confirm the stability of the results and found the results did not significantly cha  
16 nged (from OR 2.50, 95% CI [1.73–3.61] to OR 2.22, 95% CI [1.57–3.14]), which means that the results are stable.

1 **Appendix S20. Problems in the included studies in four previous systematic reviews concerning the effects of smoking on no**  
 2 **nonunion and surgical site infection**

3 Problems in the included studies in four previous systematic reviews about smoking and nonunion were described in **Appendix S20a and S20b**. Problems in  
 4 the included studies in four previous systematic reviews about smoking and surgical site infection were described in **Appendix S20c and S20e**. Result of r  
 5 ecalculation of smoking and surgical site infection data from Shao J 2018 was shown in **Appendix S20d**. Conclusion of problems in the included studies w  
 6 as described in **Appendix S20f**.

7 **S20a. Problems in the included studies about smoking and nonunion in Tian RF 2020**

| No. | No. of reference in previous systematic reviews | Author/Publication year | outcomes (smokers) | total (smokers) | outcomes (non-smokers) | total (non-smokers) | Problems in the included studies                                                                                                                                                                                                                                                |
|-----|-------------------------------------------------|-------------------------|--------------------|-----------------|------------------------|---------------------|---------------------------------------------------------------------------------------------------------------------------------------------------------------------------------------------------------------------------------------------------------------------------------|
| 1   | 19                                              | O'Halloran K 2016       | nonunion (29)      | 153             | nonunion (27)          | 229                 |                                                                                                                                                                                                                                                                                 |
| 2   | 39                                              | Jin PF 2018             | nonunion (13)      | 63              | nonunion (13)          | 134                 | This is a clinical study in Chinese with low quality. In addition, no definition of nonunion was described.                                                                                                                                                                     |
| 3   | 45                                              | Dailey HL 2018          | nonunion (38)      | 244             | nonunion (36)          | 261                 | No time period of nonunion was described.                                                                                                                                                                                                                                       |
| 4   | 46                                              | Singh A 2018            | nonunion (16)      | 26              | nonunion (28)          | 77                  | There was no definition of nonunion. In addition, the study uses nonunion in several sentences to describe this outcome, and uses delayed union in other sentences and Table 3, which is difficult to understand.                                                               |
| 5   | 50                                              | Zura R 2017             | nonunion (178)     | 1573            | nonunion (766)         | 11235               | No time period of nonunion was described.                                                                                                                                                                                                                                       |
| 6   | 57                                              | Blair JA 2016           | nonunion (7)       | 48              | nonunion (9)           | 136                 |                                                                                                                                                                                                                                                                                 |
| 7   | 94                                              | Lack WD 2014            | nonunion (6)       | 90              | nonunion (7)           | 86                  | The study did not describe whether the included patients were adults or the age range of the patients.                                                                                                                                                                          |
| 8   | 113                                             | Enninghorst N 2011      | nonunion (10)      | 23              | nonunion (16)          | 63                  |                                                                                                                                                                                                                                                                                 |
| 9   | 135                                             | Harvey EJ 2002          | nonunion (42)      | 62              | nonunion (20)          | 48                  | Patients under 18-years old (15–76 years) were included. In addition, Tian RF et al miscalculated the outcome of nonunion. Only ununited (not healed at the end of the study) was considered non-union, but late union (between 270 days and final follow-up) was not included. |

8

9 **S20b. Problems in the included studies about smoking and nonunion in Pearson RG 2016**

| No. | No. of reference in previous systematic reviews | Author/Publication year | outcomes (smokers)             | total (smokers) | outcomes (non-smokers)         | total (non-smokers) | Problems in the included studies                                                                                                                                                                                                                                                    |
|-----|-------------------------------------------------|-------------------------|--------------------------------|-----------------|--------------------------------|---------------------|-------------------------------------------------------------------------------------------------------------------------------------------------------------------------------------------------------------------------------------------------------------------------------------|
| 1   | 5                                               | Kyro A 1993             | nonunion (36)                  | 72              | nonunion (20)                  | 63                  | We were unable to verify whether the study met the inclusion and exclusion criteria because we could not obtain the literature even by email.                                                                                                                                       |
| 2   | 6                                               | Schmitz MA 1999         | nonunion (2)                   | 44              | nonunion (0)                   | 64                  |                                                                                                                                                                                                                                                                                     |
| 3   | 7                                               | Adams CI 2001           | nonunion (46)                  | 140             | nonunion (33)                  | 133                 | Patients under 18-years old (13–90 years) were included. In addition, no time period of nonunion was described.                                                                                                                                                                     |
| 4   | 8                                               | Harvey EJ 2002          | nonunion (42)                  | 62              | nonunion (20)                  | 48                  | Patients under 18-years old (15–76 years) were included. In addition, Pearson RG et al. miscalculated the outcome of nonunion. Only ununited (not healed at the end of the study) was considered non-union, but late union (between 270 days and final follow-up) was not included. |
| 5   | 9                                               | Mckee MD 2003           | nonunion (10)                  | 47              | nonunion (2)                   | 39                  | Patients under 18-years old (17–70 years) were included. In addition, no definition of nonunion was described.                                                                                                                                                                      |
| 6   | 10                                              | Castillo RC 2005        | nonunion (34)                  | 187             | nonunion (8)                   | 81                  | Patients under 18-years old (16–69 years) were included.                                                                                                                                                                                                                            |
| 7   | 11                                              | Ristiniemi J 2007       | delayed union (7)              | 16              | delayed union (5)              | 31                  | Patients under 18-years old (15–79 years) were included. Control group (non-current smokers) may include former smokers. In addition, Pearson RG et al. mistook delayed union (16–24 weeks) as nonunion in their study.                                                             |
| 8   | 12                                              | Enninghorst N 2011      | nonunion (10)                  | 23              | nonunion (16)                  | 63                  |                                                                                                                                                                                                                                                                                     |
| 9   | 13                                              | Moghaddam A 2011        | nonunion (9)                   | 46              | nonunion (0)                   | 39                  |                                                                                                                                                                                                                                                                                     |
| 10  | 14                                              | Ahmed 2018              | nonunion (8)                   | 8               | nonunion (10)                  | 10                  | Although no definition of nonunion was described, time to union of each fracture was recorded. However, Pearson RG et al. incorrectly defined the time period of nonunion.                                                                                                          |
| 11  | 15                                              | Ding L 2014             | nonunion (11)                  | 165             | nonunion (13)                  | 494                 |                                                                                                                                                                                                                                                                                     |
| 12  | 16                                              | Tay WH 2014             | delayed union or nonunion (66) | 161             | delayed union or nonunion (72) | 262                 | Delayed union and nonunion were mixed.                                                                                                                                                                                                                                              |
| 13  | 17                                              | Liu W 2015              | nonunion (30)                  | 155             | nonunion (66)                  | 649                 |                                                                                                                                                                                                                                                                                     |
| 14  | 18                                              | Ruffolo MR 2015         | nonunion (5)                   | 54              | nonunion (9)                   | 86                  | Patients under 18-years old (16–78 years) were included.                                                                                                                                                                                                                            |

1

2

### S20c. Problems in the included studies about smoking and surgical site infection in Shao J 2018

1 In Shao J 2018, five studies were included in the meta-analysis, but the authors did not describe which five studies were. We re-screened the literature inclu  
 2 ded in the Shao J 2018 and found that two more studies could be included in meta-analysis. Therefore, we listed these seven studies below and performed  
 3 meta-analysis again using the data (**Appendix S20d**).

| No. | No. of reference in Shao J 2018 | Author/Publication year | outcomes (smokers)          | total (smokers) | outcomes (non-smokers)       | total (non-smokers) | Problems in the included studies                                |
|-----|---------------------------------|-------------------------|-----------------------------|-----------------|------------------------------|---------------------|-----------------------------------------------------------------|
| 1   | 4                               | Korim MT 2014           | infection (8)               | 18              | infection (21)               | 692                 |                                                                 |
| 2   | 13                              | Nasell H 2011           | DSSI (9)<br>SSSI (27)       | 183             | DSSI (6)<br>SSSI (69)        | 708                 | Patients under 18-years old ( $\geq 15$ years) were included.   |
| 3   | 22                              | Olsen LL 2017           | DSSI (21)<br>infection (39) | 283             | DSSI (43)<br>infection (106) | 760                 | Patients under 18-years old (9–95 years) were included.         |
| 4   | 25                              | Sun R 2017              | infection (11)              | 262             | infection (35)               | 985                 | Control group (non-current smokers) may include former smokers. |
| 5   | 26                              | Sun Y 2018              | infection (13)              | 355             | infection (53)               | 1155                | Control group (non-current smoking) may include former smokers. |
| 6   | 28                              | Naumann MG 2016         | infection (10)              | 136             | infection (19)               | 431                 | Control group (non-current smokers) may include former smokers. |
| 7   | 48                              | Ovaska MT 2013          | DSSI (47)                   | 64              | DSSI (84)                    | 198                 |                                                                 |

4

5 **S20d. Resynthesis of data on smoking and surgical site infection from Shao J 2018**

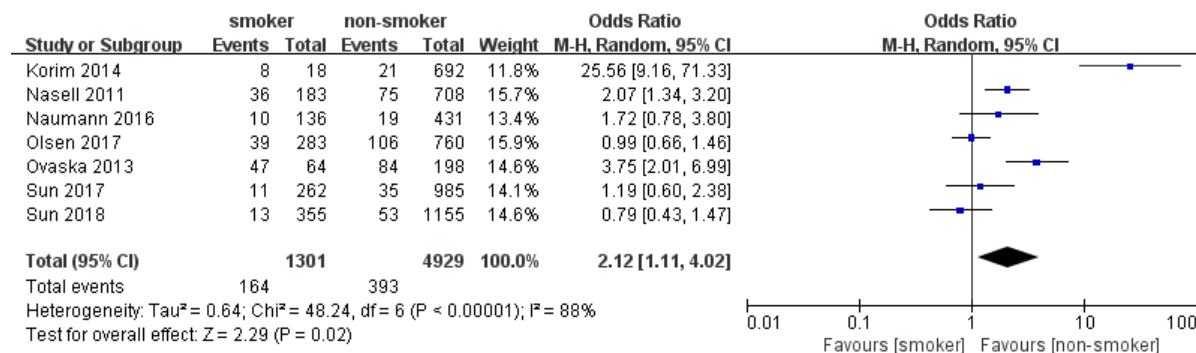

6

7

8 **S20e. Problems in the included studies about smoking and surgical site infection in Kortram K 2017**

| No. | No. of reference in previous systematic reviews | Author/Publication year | outcomes (smokers) | total (smokers) | outcomes (non-smokers) | total (non-smokers) | Problems in the included studies |
|-----|-------------------------------------------------|-------------------------|--------------------|-----------------|------------------------|---------------------|----------------------------------|
|-----|-------------------------------------------------|-------------------------|--------------------|-----------------|------------------------|---------------------|----------------------------------|

|    |    |                      |                                                                    |     |                                                                    |     |                                                                                                                                                      |
|----|----|----------------------|--------------------------------------------------------------------|-----|--------------------------------------------------------------------|-----|------------------------------------------------------------------------------------------------------------------------------------------------------|
| 1  | 20 | Enninghorst N 2011   | infection (4)                                                      | 23  | infection (11)                                                     | 66  |                                                                                                                                                      |
| 2  | 23 | Molina CS 2015       | DSSI (30)                                                          | 149 | DSSI (27)                                                          | 206 | Patients under 18-years old ( $\geq 15$ years) were included. In addition, control group (non-active smoker) may include former smokers.             |
| 3  | 24 | Ovaska MT 2016       | no available data                                                  | 32  | no available data                                                  | 78  | Patients under 18-years old ( $\geq 16$ years) were included. Kortram K et al. mistook wound necrosis as a wound infection in their study.           |
| 4  | 25 | Lawing CR 2015       | SSSI (4)<br>DSSI (11)                                              | 73  | SSSI (12).<br>DSSI (25)                                            | 278 | Patients under 18-years old ( $\geq 10$ years) were included. Control group (None to less than half a pack per day) may include smokers.             |
| 5  | 27 | Lack WD 2014         | infection (8)                                                      | 39  | infection (16)                                                     | 98  | The study did not describe the patients' age range.                                                                                                  |
| 6  | 33 | Zumsteg JW 2014      | DSSI (4)                                                           | 63  | DSSI (6)                                                           | 137 |                                                                                                                                                      |
| 7  | 36 | Reuss BL 2007        | infection (4)                                                      | 20  | infection (3)                                                      | 34  | Patients under 18-years old ( $>17$ years) were included.                                                                                            |
| 8  | 37 | Castillo RC 2005     | infection (37)                                                     | 187 | infection (12)                                                     | 81  | Patients under 18-years old (16–69 years) were included.                                                                                             |
| 9  | 38 | Adams CI 2001        | Pin track infection (8)<br>soft tissue infection (21)<br>DSSI (14) | 140 | Pin track infection (9)<br>soft tissue infection (13)<br>DSSI (14) | 133 | Patients under 18-years old (13–90 years) were included.                                                                                             |
| 10 | 39 | Merritt K 1988       | infection (6)                                                      | 34  | infection (7)                                                      | 36  | The study did not describe minimum age of the patients ( $<20$ , 21–40, 41–60, $>60$ years). Therefore, patients under 18 years old may be included. |
| 11 | 40 | Penn-Barwell JG 2016 | infection (5)                                                      | 23  | infection (12)                                                     | 44  | The study did not describe whether the included patients were adults or the age range of the patients.                                               |

1 Note: SSSI: superficial surgical site infection; DSSI: deep surgical site infection.

2

3 **S20f. Conclusion of problems in previous studies that led to unreliable results**

4 Most of the studies that were included in previous systematic reviews were inappropriate for the following reasons:

5 (1) Lack of time period in the definition of nonunion used for evaluation.[35,79,123-128]

6 (2) Delayed union and nonunion were mixed.[129]

7 (3) Patients under 18-years-old[123,124,126,127,130-137] were included, or the studies had no descriptions of the age ranges of patients.[138-140]



- 1 (4) The control group may have included former smokers.[16,75,98,134,141,142]
- 2 (5) One study[125] in the Chinese language was included in the data synthesis, which may have reduced the quality of evidence and may have created bias.[143]
- 3 (6) Uncomprehensive search strategies were performed.

1 **Appendix S21. Problems in the included studies in two previous systematic reviews about effects of alcohol drinking on non**  
 2 **union and surgical site infection**

3 **S21a. Problems in the included studies about alcohol drinking and nonunion in Tian RF 2020**

| No. | No. of reference in previous systematic reviews | Author/Publication year | outcomes (alcohol drinkers) | total (alcohol drinkers) | outcomes (non-drinkers) | total (non-drinkers) | Problems in the included studies                                                                                    |
|-----|-------------------------------------------------|-------------------------|-----------------------------|--------------------------|-------------------------|----------------------|---------------------------------------------------------------------------------------------------------------------|
| 1   | 19                                              | O'Halloran K 2016       | nonunion (20)               | 104                      | nonunion (36)           | 278                  | Control group (non-drinkers or social drinkers) may include alcohol drinkers.                                       |
| 2   | 50                                              | Zura R 2017             | nonunion (22)               | 244                      | nonunion (922)          | 12564                | Control group (non-alcoholism) may include alcohol drinkers. In addition, no time period of nonunion was described. |

4

5 **S21b. Problems in the included studies about alcohol drinking and surgical site infection in Shao J 2018**

6 In Shao J 2018, three studies were included in the meta-analysis, but the authors did not describe which three studies were. We re-screened the literature included in the Shao J 2018 and found that two more studies could be included in meta-analysis. Therefore, we listed these five studies below and performed  
 7 meta-analysis again using the data (**Appendix S21c**).  
 8

9

| No. | No. of reference in previous systematic reviews | Author/Publication year | outcomes (alcohol drinkers) | total (alcohol drinkers) | outcomes (non-drinkers)     | total (non-drinkers) | Problems in the included studies                                                                                                 |
|-----|-------------------------------------------------|-------------------------|-----------------------------|--------------------------|-----------------------------|----------------------|----------------------------------------------------------------------------------------------------------------------------------|
| 1   | 4                                               | Korim MT 2014           | infection (5)               | 6                        | infection (24)              | 704                  | Control group (non-excess alcohol drinkers) may include drinkers.                                                                |
| 2   | 22                                              | Olsen LL 2017           | DSSI (22)<br>infection (47) | 243                      | DSSI (42)<br>infection (97) | 800                  | Patients under 18-years old (9–95) were included. In addition, control group (non-alcohol overuse) may include alcohol drinkers. |
| 3   | 25                                              | Sun R2017               | infection (12)              | 251                      | infection (34)              | 996                  |                                                                                                                                  |
| 4   | 26                                              | Sun Y2018               | infection (11)              | 150                      | infection (55)              | 1360                 | Control group (non-alcoholism) may include alcohol drinkers.                                                                     |
| 5   | 48                                              | Ovaska MT2013           | DSSI (29)                   | 41                       | DSSI (102)                  | 160                  | Control group (non-alcohol abuser) may include drinkers.                                                                         |

10 Note: DSSI: deep surgical site infection.

11

12

13

1

2 **S21c. Resynthesis of data on alcohol drinking and surgical site infection from Shao J 2018**

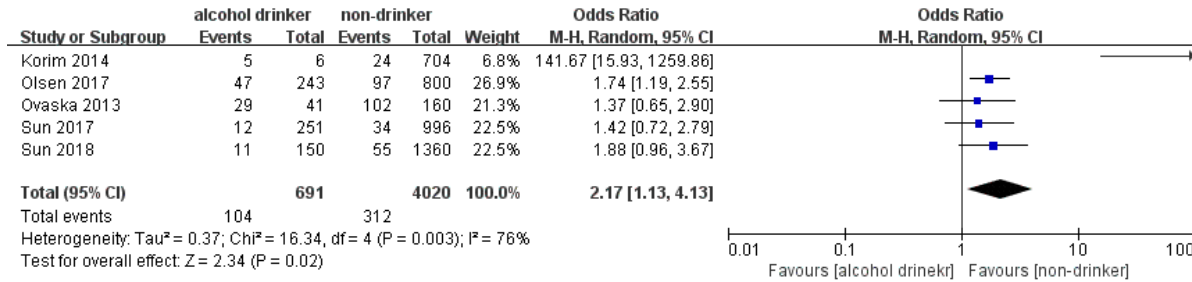

3

4

5 **S21d. Problems in the included studies about alcohol drinking and surgical site infection in Kortram K 2017**

6 In Kortram K 2017, three studies were included in the meta-analysis, and the authors clearly described which three studies were. However, outcome that was described in one study Ovaska MT 2016 was wound necrosis rather than wound infection. In Ovaska MT 2016, 10 of 18 patients with wound necrosis were considered patients with wound infection. However, Kortram K 2017 considered those 18 patients with wound necrosis as wound infection. Since the number of infection events in alcohol drinker group and non-drinker group was not clearly described in Ovaska MT 2016, we used the data of remaining two studies to perform resynthesis (**Appendix S21e**).

11

| No. | No. of reference in previous systematic reviews | Author/Publication year | outcomes (alcohol drinkers) | total (alcohol drinkers) | outcomes (non-drinkers) | total (non-drinkers) | Problems in the included studies                                                                                                                                                                                                                                                                                                                                                                     |
|-----|-------------------------------------------------|-------------------------|-----------------------------|--------------------------|-------------------------|----------------------|------------------------------------------------------------------------------------------------------------------------------------------------------------------------------------------------------------------------------------------------------------------------------------------------------------------------------------------------------------------------------------------------------|
| 1   | 24                                              | Ovaska MT 2016          | no available data           | 39                       | no available data       | 71                   | Firstly, patients under 18-years old ( $\geq 16$ years) were included. Secondly, control group (non-alcohol abuser) may include drinker. Lastly, outcome in Ovaska MT 2016 was necrosis rather than infection. Ten of 18 patients with wound necrosis were considered to have a deep infection. However, Kortram K 2017 considered those 18 patients with necrosis as patients with wound infection. |
| 2   | 25                                              | Lawing CR 2015          | SSSI (8)<br>DSSI (22)       | 159                      | SSSI (8)<br>DSSI (14)   | 192                  | Patients under 18-years old ( $\geq 10$ years) were included. In addition, control group (none or occasional drinker) may include drinker.                                                                                                                                                                                                                                                           |

|   |    |                |               |    |               |    |                                                                                                                                                |
|---|----|----------------|---------------|----|---------------|----|------------------------------------------------------------------------------------------------------------------------------------------------|
| 3 | 39 | Merritt K 1988 | infection (7) | 35 | infection (6) | 35 | The study did not describe minimum age of the patients (<20, 21–40, 41–60, >60 years). Therefore, patients under 18 years old may be included. |
|---|----|----------------|---------------|----|---------------|----|------------------------------------------------------------------------------------------------------------------------------------------------|

1 Note: SSSI: superficial surgical site infection; DSSI: deep surgical site infection.

2

3 **S21e. Resynthesis of data on alcohol drinking and surgical site infection from Kortram K 2017**

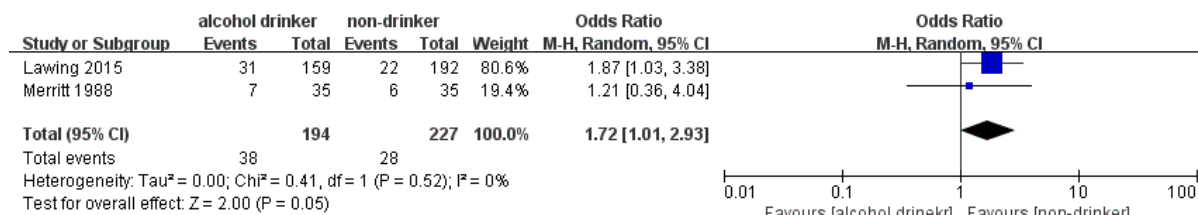

4

5

**Appendix S22. Problems in the two previous meta-analyses concerning the effects of preoperative smoking cessation time on wound healing and wound complications**

| No | Study/study design | Included studies | Surgery                                                                                         | Smoking cessation time                 | Outcomes (cessation)                                   | total (cessation) | Outcomes (continued smokers)                               | total (continued smokers) | Results and problems                                                                                                                                                                                                                                                                                                                                                                                                                                                                                                                                                                                                                                                                                                                                                                                     |
|----|--------------------|------------------|-------------------------------------------------------------------------------------------------|----------------------------------------|--------------------------------------------------------|-------------------|------------------------------------------------------------|---------------------------|----------------------------------------------------------------------------------------------------------------------------------------------------------------------------------------------------------------------------------------------------------------------------------------------------------------------------------------------------------------------------------------------------------------------------------------------------------------------------------------------------------------------------------------------------------------------------------------------------------------------------------------------------------------------------------------------------------------------------------------------------------------------------------------------------------|
| 1  | Sorensen 2012[144] | Lindstrom 2008   | Herniotomy, cholecystectomy, hip, or knee arthroplasty                                          | 4 weeks pre-op through 4 weeks after   | combined wound complication (6)<br>wound infection (2) | 48                | combined wound complication (14)<br>wound complication (4) | 54                        | Results: The meta-analysis disclosed that perioperative smoking cessation did not significantly reduce healing complications combined (OR 0.48, 95%CI [0.19–1.25], $P=0.14$ , $I^2=61.1\%$ ).<br>In contrast, surgical site infections were significantly reduced by perioperative smoking cessation as shown by a sensitivity analysis (OR 0.40, 95%CI [0.20–0.83], $P=0.01$ , $I^2=19.8\%$ ).<br>Problem:<br>Smoking cessation time was not classified.                                                                                                                                                                                                                                                                                                                                                |
|    |                    | Moller 2002      | Hip or knee arthroplasty                                                                        | 6–8 weeks pre-op through 10 days after | combined wound complication (3)<br>wound infection (2) | 56                | combined wound complication (16)<br>wound infection (12)   | 52                        |                                                                                                                                                                                                                                                                                                                                                                                                                                                                                                                                                                                                                                                                                                                                                                                                          |
|    |                    | Sorensen 2003    | Colorectal resection                                                                            | 2–3 weeks pre-op through 10 days after | combined wound complication (9)<br>wound infection (3) | 27                | combined wound complication (8)<br>wound infection (4)     | 30                        |                                                                                                                                                                                                                                                                                                                                                                                                                                                                                                                                                                                                                                                                                                                                                                                                          |
|    |                    | Sorensen 2007    | Inguinal or incisional herniotomy                                                               | 4 weeks pre-op through 10 days after   | wound infection (6)                                    | 101               | wound infection (4)                                        | 48                        |                                                                                                                                                                                                                                                                                                                                                                                                                                                                                                                                                                                                                                                                                                                                                                                                          |
| 2  | Wong 2012[145]     | Chan 2006        | Bilateral breast reduction surgery                                                              | ≥1 month pre-op                        | wound healing problem (5)                              | 15                | wound healing problem (10)                                 | 19                        | Results:<br>Ex-smokers who quit more than 3 to 4 weeks before surgery had lower relative risks of postoperative wound healing complications than those who quit less than 3 to 4 weeks before surgery (RR 0.74, 95%CI [0.56–0.98], $P=0.04$ , $I^2=34\%$ ).<br>Problems:<br>1. In Chang 1999 and Goodwin 2005, patients were classified as former smokers if they had stopped smoking at least 4 weeks before surgery. However, smoking cessation may not be done during the study, that is, patients who had quit smoking for a long time may also be included in the study.<br>In order to study the effect of a clear time to quit smoking before surgery, we did not include these studies.<br>2. The data of Glassman 2000 was bone nonunion. However, the author of the meta-analysis misjudged it |
|    |                    | Chang 1999       | Free TRAM flap breast reconstruction                                                            | ≥4 weeks pre-op                        | wound healing complication (15)                        | 150               | wound healing complication (23)                            | 90                        |                                                                                                                                                                                                                                                                                                                                                                                                                                                                                                                                                                                                                                                                                                                                                                                                          |
|    |                    | Glassman 2000    | spinal fusion                                                                                   | >1 month pre-op                        | wound healing complication (10)                        | 51                | wound healing complication (15)                            | 74                        |                                                                                                                                                                                                                                                                                                                                                                                                                                                                                                                                                                                                                                                                                                                                                                                                          |
|    |                    | Goodwin 2005     | tissue expander/implant breast reconstruction                                                   | 4 weeks pre-op                         | overall complication (31)                              | 78                | overall complication (20)                                  | 54                        |                                                                                                                                                                                                                                                                                                                                                                                                                                                                                                                                                                                                                                                                                                                                                                                                          |
|    |                    | Kuri 2005        | removal of nasal, oral, pharyngeal, laryngeal, or cervical esophageal cancer and reconstruction | 8–21 days, 22–42 days                  | impaired wound healing (11)                            | 20                | impaired wound healing (23)                                | 34                        |                                                                                                                                                                                                                                                                                                                                                                                                                                                                                                                                                                                                                                                                                                                                                                                                          |
|    |                    | Lindstrom 2008   | Herniotomy, cholecystectomy, hip, or knee arthroplasty                                          | 4 weeks pre-op through 4 weeks after   | combined wound complication (2)                        | 20                | combined wound complication (0)                            | 9                         |                                                                                                                                                                                                                                                                                                                                                                                                                                                                                                                                                                                                                                                                                                                                                                                                          |

|  |  |                   |                       |                 |                                             |    |                                          |     |                                                                                                                                                                |
|--|--|-------------------|-----------------------|-----------------|---------------------------------------------|----|------------------------------------------|-----|----------------------------------------------------------------------------------------------------------------------------------------------------------------|
|  |  | Padubidri<br>2001 | Breast reconstruction | ≥3 weeks pre-op | combined wound healing complication<br>(19) | 76 | combined wound healing complication (61) | 155 | as wound healing complication.<br>3. The overall complication or wound complication that was combined outcomes was analysed instead of each outcome in detail. |
|--|--|-------------------|-----------------------|-----------------|---------------------------------------------|----|------------------------------------------|-----|----------------------------------------------------------------------------------------------------------------------------------------------------------------|

Note: OR: odds ratio; RR: risk ratio

## References

- [1] Askew A, Chakkalakal D, Fang X, McGuire M. Delayed fracture healing in alcohol Abusers- A preliminary retrospective study. *Open Bone Journal*. 2011;3:1-5.
- [2] Bai Y, Zhang X, Tian Y, Tian D, Zhang B. Incidence of surgical-site infection following open reduction and internal fixation of a distal femur fracture: An observational case-control study. *Medicine (United States)*. 2019;98(7).
- [3] Ding L, He Z, Xiao H, Chai L, Xue F. Factors affecting the incidence of aseptic nonunion after surgical fixation of humeral diaphyseal fracture. *Journal of Orthopaedic Science*. 2014;19(6):973-7.
- [4] Kent M, Mumith A, McEwan J, Hancock N. The service impact of failed locking plate fixation of distal tibial fractures: a service and financial evaluation at a major trauma centre. *European Journal of Orthopaedic Surgery and Traumatology*. 2015;25(8):1333-42.
- [5] Liu W, Xiao J, Ji F, Xie Y, Hao Y. Intrinsic and extrinsic risk factors for nonunion after nonoperative treatment of midshaft clavicle fractures. *Orthopaedics and Traumatology: Surgery and Research*. 2015;101(2):197-200.
- [6] Ma Q, Aierxiding A, Wang G, Wang C, Yu L, Shen Z. Incidence and risk factors for deep surgical site infection after open reduction and internal fixation of closed tibial plateau fractures in adults. *International Wound Journal*. 2018;15(2):237-42.
- [7] McKissack HM, Viner GC, Jha AJ, et al. Comparison of risk factors for postoperative complications across age groups in patients undergoing ORIF of the ankle. *Injury*. 2019.
- [8] Meng J, Sun T, Zhang F, Qin S, Li Y, Zhao H. Deep surgical site infection after ankle fractures treated by open reduction and internal fixation in adults: A retrospective case-control study. *International Wound Journal*. 2018;15(6):971-7.
- [9] Ovaska MT, Mäkinen TJ, Madanat R, et al. Risk factors for deep surgical site infection following operative treatment of ankle fractures. *Journal of Bone and Joint Surgery - Series A*. 2013;95(4):348-53.
- [10] Parker B, Petrou S, Achana F, Masters JPM, Costa ML. Economic outcomes associated with deep surgical site infection in patients with an open fracture of the lower limb. *Bone and Joint Journal*. 2018;100B(11):1506-10.
- [11] Thorud JC, Mortensen S, Thorud JL, Shibuya N, Maldonado YM, Jupiter DC. Effect of Obesity on Bone Healing After Foot and Ankle Long Bone Fractures. *Journal of Foot & Ankle Surgery*. 2017;56(2):258-62.
- [12] Bowen TR, Widmaier JC. Host classification predicts infection after open fracture. *Clinical Orthopaedics and Related Research*. 2005(433):205-11.
- [13] Chan G, Iliopoulos E, Jain A, Turki M, Trompeter A. Infection after operative fixation of tibia plateau fractures. A risk factor analysis. *Injury*. 2019.
- [14] Claessen FMAP, Braun Y, van Leeuwen WF, Dyer GS, van den Bekerom MPJ, Ring D. What

Factors are Associated With a Surgical Site Infection After Operative Treatment of an Elbow Fracture? *Clinical Orthopaedics and Related Research*. 2016;474(2):562-70.

[15] Flynn JM, Rodriguez-del Rio F, Piza PA. Closed ankle fractures in the diabetic patient. *Foot Ankle Int*. 2000;21(4):311-9.

[16] Sun R, Li M, Wang X, et al. Surgical site infection following open reduction and internal fixation of a closed ankle fractures: A retrospective multicenter cohort study. *International Journal of Surgery*. 2017;48:86-91.

[17] Alzahrani MM, Cota A, Alkhelaifi K, et al. Are clinical outcomes affected by type of plate used for management of mid-shaft clavicle fractures? *Journal of Orthopaedics and Traumatology*. 2018;19(1).

[18] Basques BA, Webb ML, Bohl DD, Golinvaux NS, Grauer JN. Adverse events, length of stay, and readmission following surgery for tibial plateau fractures. *Journal of Orthopaedic Trauma*. 2014.

[19] Blair JA, Stoops TK, Doarn MC, et al. Infection and nonunion after fasciotomy for compartment syndrome associated with tibia fractures: A matched cohort comparison. *Journal of Orthopaedic Trauma*. 2016;30(7):392-6.

[20] Bone LB, Sucato D, Stegemann PM, Rohrbacher BJ. Displaced isolated fractures of the tibial shaft treated with either a cast or intramedullary nailing: An outcome analysis of matched pairs of patients. *Journal of Bone and Joint Surgery - Series A*. 1997;79(9):1336-41.

[21] Branch NN, Obirize A, Wilson RH. Assessment of racial and sex disparities in open femoral fractures. *American Journal of Surgery*. 2015;209(4):666-74.

[22] Chu JY, Yeh KT, Lee RP, et al. Open reduction and internal fixation with plating is beneficial in the early recovery stage for displaced midshaft clavicular fractures in patients aged 30-65 years old. *Tzu Chi Medical Journal*. 2018;30(4):242-6.

[23] Donohue D, Sanders D, Serrano-Riera R, et al. Ketorolac administered in the recovery room for acute pain management does not affect healing rates of femoral and tibial fractures. *Journal of Orthopaedic Trauma*. 2016;30(9):479-82.

[24] Enninghorst N, McDougall D, Hunt JJ, Balogh ZJ. Open tibia fractures: Timely debridement leaves injury severity as the only determinant of poor outcome. *Journal of Trauma - Injury, Infection and Critical Care*. 2011;70(2):352-7.

[25] Haller JM, Githens M, Rothberg D, Higgins T, Nork S, Barei D. Risk Factors for Tibial Plafond Nonunion: Medial Column Fixation May Reduce Nonunion Rates. *Journal of orthopaedic trauma*. 2019;33(9):443-9.

[26] Kim SM, Yeom JW, Song HK, Hwang KT, Hwang JH, Yoo JH. Lateral locked plating for distal femur fractures by low-energy trauma: what makes a difference in healing? *International Orthopaedics*. 2018;42(12):2907-14.

[27] Kuklo TR, Groth AT, Anderson RC, Frisch HM, Islinger RB. Recombinant human bone morphogenetic protein-2 for grade III open segmental tibial fractures from combat injuries in Iraq.



Journal of Bone and Joint Surgery - Series B. 2008;90(8):1068-72.

- [28] McDonald E, Winters B, Nicholson K, et al. Effect of Postoperative Ketorolac Administration on Bone Healing in Ankle Fracture Surgery. *Foot and Ankle International*. 2018;39(10):1135-40.
- [29] Moghaddam A, Zimmermann G, Hammer K, Bruckner T, Grützner PA, Von Recum J. Cigarette smoking influences the clinical and occupational outcome of patients with tibial shaft fractures. *Injury*. 2011;42(12):1435-42.
- [30] Momaya AM, Hlavacek J, Etier B, et al. Risk factors for infection after operative fixation of Tibial plateau fractures. *Injury*. 2016;47(7):1501-5.
- [31] Morris BJ, Unger RZ, Archer KR, Mathis SL, Perdue AM, Obremskey WT. Risk factors of infection after ORIF of bicondylar tibial plateau fractures. *Journal of Orthopaedic Trauma*. 2013;27(9):e196-e200.
- [32] Murray IR, Foster CJ, Eros A, Robinson CM. Risk factors for nonunion after nonoperative treatment of displaced midshaft fractures of the clavicle. *Journal of Bone and Joint Surgery - Series A*. 2013;95(13):1153-8.
- [33] Özbek Z, Özkara E, Öner H, et al. Treatment of Unstable Thoracolumbar Fractures: does Fracture-Level Fixation Accelerate the Bone Healing? *World neurosurgery*. 2017;107:362-70.
- [34] Shah CM, Babb PE, McAndrew CM, et al. Definitive plates overlapping provisional external fixator pin sites: Is the infection risk increased? *Journal of Orthopaedic Trauma*. 2014;28(9):518-22.
- [35] Singh A, Tan Jiong Hao J, Tan Wei D, et al. Gustilo IIIB Open Tibial Fractures: An analysis of Infection and Nonunion Rates. *Indian Journal of Orthopaedics*. 2018;52(4):406-10.
- [36] Snäll J, Apajalahti S, Suominen AL, Törnwall J, Thorén A. Influence of perioperative dexamethasone on delayed union in mandibular fractures: A clinical and radiological study. *Medicina Oral, Patologia Oral y Cirugia Bucal*. 2015;20(5):e621-e6.
- [37] Zumsteg JW, Molina CS, Lee DH, Pappas ND. Factors influencing infection rates after open fractures of the radius and/or ulna. *Journal of Hand Surgery*. 2014;39(5):956-61.
- [38] Assous M, Bhamra MS. Should Os calcis fractures in smokers be fixed? A review of 40 patients. *Injury*. 2001;32(8):631-2.
- [39] Hoffmann MF, Jones CB, Sietsema DL, Tornetta 3rd P, Koenig SJ. Clinical outcomes of locked plating of distal femoral fractures in a retrospective cohort. *Journal of orthopaedic surgery and research*. 2013;8:43.
- [40] Li J, Zhu Y, Liu B, Dong T, Chen W, Zhang Y. Incidence and risk factors for surgical site infection following open reduction and internal fixation of adult tibial plateau fractures. *International Orthopaedics*. 2018;42(6):1397-403.
- [41] Lin S, Mauffrey C, Hammerberg EM, Stahel PF, Hak DJ. Surgical site infection after open reduction and internal fixation of tibial plateau fractures. *European Journal of Orthopaedic Surgery and Traumatology*. 2014;24(5):797-803.
- [42] McGarvey WC, Burris MW, Clanton TO, Melissinos EG. Calcaneal fractures: Indirect reduction

and external fixation. *Foot and Ankle International*. 2006;27(7):494-9.

[43] Minhas SV, Catalano LW. Comparison of Open and Closed Hand Fractures and the Effect of Urgent Operative Intervention. *Journal of Hand Surgery*. 2019;44(1):65.e1-.e7.

[44] Korim MT, Payne R, Bhatia M. A case-control study of surgical site infection following operative fixation of fractures of the ankle in a large U.K. trauma unit. *Bone Joint J*. 2014;96-b(5):636-40.

[45] Ren T, Ding L, Xue F, He Z, Xiao H. Risk factors for surgical site infection of pilon fractures. *Clinics (São Paulo, Brazil)*. 2015;70(6):419-22.

[46] Spross C, Platz A, Erschbamer M, Lattmann T, Dietrich M. Surgical treatment of neer group vi proximal humeral fractures: Retrospective comparison of PHILOS® and hemiarthroplasty. *Clinical Orthopaedics and Related Research*. 2012;470(7):2035-42.

[47] Benedick A, Rivera T, Vallier HA. Effect of Tourniquet Use During Ankle Fracture Fixation on Wound Healing and Infectious Complications. *Foot and Ankle International*. 2020.

[48] Esposito JG, van der Vliet QMJ, Heng M, et al. Does surgical approach influence the risk of post-operative infection following surgical treatment of tibial pilon fractures? *Journal of orthopaedic trauma*. 2019.

[49] Ogihara S, Yamazaki T, Shiibashi M, et al. Risk Factor Analysis of Deep Surgical Site Infection After Posterior Instrumented Fusion Surgery for Spinal Trauma: A Multicenter Observational Study. *World Neurosurgery*. 2020;134:e524-e9.

[50] Li J, Wang Q, Lu Y, et al. Relationship Between Time to Surgical Debridement and the Incidence of Infection in Patients with Open Tibial Fractures. *Orthopaedic Surgery*. 2020.

[51] Ahmed ASA, Singer MS, El Bigawi HA. Neglected tibial pilon fractures: Can arthrodesis be avoided? *Journal of Orthopaedic Trauma*. 2018;32(7):369-75.

[52] Ukai T, Hamahashi K, Uchiyama Y, Kobayashi Y, Watanabe M. Retrospective analysis of risk factors for deep infection in lower limb Gustilo–Anderson type III fractures. *Journal of Orthopaedics and Traumatology*. 2020;21(1).

[53] Olson JJ, Anand K, von Keudell A, et al. Judicious Use of Early Fixation of Closed, Complete Articular Pilon Fractures Is Not Associated With an Increased Risk of Deep Infection or Wound Complications. *J Orthop Trauma*. 2021;35(6):300-7.

[54] Subramanyam KN, Mundargi AV, Gopakumar KU, Bharath T, Prabhu MV, Khanchandani P. Displaced midshaft clavicle fractures in adults - is non-operative management enough? *Injury*. 2021;52(3):493-500.

[55] Mardanpour K, Rezaei M, Rahbar M, Mardanpour S. Risk factors for surgical site infections after open reduction and internal fixation of acetabulum fracture in the west of Iran. *International Journal of Surgery Open*. 2020;27:119-22.

[56] Tan Z, Wang Z, Wang Y, Hu H, Zhang Y, Chen W. Prevalence and risk factors of surgical site infection after closed isolated patella fracture surgery: A prospective cohort study. *Int Orthop*. 2021.

- [57] Zhu C, Zhang J, Li J, et al. Incidence and predictors of surgical site infection after distal femur fractures treated by open reduction and internal fixation: a prospective single-center study. *BMC Musculoskelet Disord*. 2021;22(1):258.
- [58] Olson JJ, Entezari V, Vallier HA. Risk factors for nonunion after traumatic humeral shaft fractures in adults. *JSES international*. 2020;4(4):734-8.
- [59] Arastu M, Sheehan B, Buckley R. Minimally invasive reduction and fixation of displaced calcaneal fractures: Surgical technique and radiographic analysis. *International Orthopaedics*. 2014;38(3):539-45.
- [60] Bhandari M, Spargue S, Hanson B, et al. Health-related quality of life following operative treatment of unstable ankle fractures: A prospective observational study. *Journal of Orthopaedic Trauma*. 2004;18(6):338-45.
- [61] Sohn HS, Kim WJ, Shon MS. Comparison between open plating versus minimally invasive plate osteosynthesis for **acute displaced clavicular shaft fractures**. *Injury*. 2015;46(8):1577-84.
- [62] Unlu S, Catma MF, Bilgetekin YG, et al. Minimally Invasive Plate Osteosynthesis of Distal Tibia and Fibular Fractures Through a Single Distal Anterolateral Incision. *Journal of Foot and Ankle Surgery*. 2015;54(6):1081-4.
- [63] Formica M, Cavagnaro L, Basso M, et al. Which patients risk segmental kyphosis after short segment thoracolumbar fracture fixation with intermediate screws? *Injury*. 2016;47:S29-S34.
- [64] Frantz TL, Meschbach NT, Niedermeier SR, Pettit RJ, Plummer DR, Harrison RK. Factors influencing time to union of diaphyseal humeral fractures after plate fixation: A retrospective cohort study. *Current Orthopaedic Practice*. 2019.
- [65] Pastides PS, Milnes L, Rosenfeld PF. Percutaneous Arthroscopic Calcaneal Osteosynthesis: A Minimally Invasive Technique for Displaced Intra-Articular Calcaneal Fractures. *Journal of Foot and Ankle Surgery*. 2015;54(5):798-804.
- [66] Burnett Z, Barzee BM, Hymes R, Cannada LK. Clinical Outcomes following Tongue Type Calcaneus Fractures. *Techniques in Orthopaedics*. 2019.
- [67] Johnston LE, Parker MJ. Hip fractures and chronic alcohol excess: A series of 7,023 cases. *HIP International*. 2014;24(6):644-9.
- [68] Nyquist F, Berglund M, Nilsson BE, Obrant KJ. Nature and healing of tibial shaft fractures in alcohol abusers. *Alcohol and Alcoholism*. 1997;32(1):91-5.
- [69] Tonnesen H, Pedersen A, Jensen MR, Moller A, Madsen JC. Ankle fractures and alcoholism. The influence of alcoholism on morbidity after malleolar fractures. *Journal of Bone and Joint Surgery - Series B*. 1991;73(3):511-3.
- [70] Lin S, Xie J, Yao X, Dai Z, Wu W. The Use of Cryotherapy for the Prevention of Wound Complications in the Treatment of Calcaneal Fractures. *Journal of Foot and Ankle Surgery*. 2018;57(3):436-9.
- [71] White TO, Guy P, Cooke CJ, et al. The results of early primary open reduction and internal

fixation for treatment of OTA 43.C-type tibial pilon fractures: A cohort study. *Journal of Orthopaedic Trauma*. 2010;24(12):757-63.

[72] Krishnan B. The Role of a Conservative Minimal Interventional Management Protocol in the Fractures of the Dentate Portion of the Adult Mandible. *Craniofacial Trauma and Reconstruction*. 2015;9(1):20-8.

[73] Zura R, Xiong Z, Einhorn T, et al. Epidemiology of fracture nonunion in 18 human bones. *JAMA Surgery*. 2016;151(11).

[74] Gaal A, Bailey B, Patel Y, et al. Limiting Antibiotics When Managing Mandible Fractures May Not Increase Infection Risk. *Journal of Oral and Maxillofacial Surgery*. 2016;74(10):2008-18.

[75] Sun Y, Wang H, Tang Y, et al. Incidence and risk factors for surgical site infection after open reduction and internal fixation of ankle fracture. *Medicine (United States)*. 2018;97(7).

[76] Zura R, Braid-Forbes MJ, Jeray K, et al. Bone fracture nonunion rate decreases with increasing age: A prospective inception cohort study. *Bone*. 2017;95:26-32.

[77] Boesmueller S, Wech M, Gregori M, et al. Risk factors for humeral head necrosis and nonunion after plating in proximal humeral fractures. *Injury*. 2016;47(2):350-5.

[78] Cook SD, Ryaby JR, McCabe J, Frey JJ, Heckman JD, Kristiansen TK. Acceleration of tibia and distal radius fracture healing in patients who smoke. *Clinical Orthopaedics and Related Research*. 1997(337):198-207.

[79] Dailey HL, Wu KA, Wu PS, McQueen MM, Court-Brown CM. Tibial fracture nonunion and time to healing after reamed intramedullary nailing: Risk factors based on a single-center review of 1003 patients. *Journal of Orthopaedic Trauma*. 2018;32(7):E263-E9.

[80] Dingemans SA, Birnie MFN, Backes M, et al. Prophylactic negative pressure wound therapy after lower extremity fracture surgery: a pilot study. *International Orthopaedics*. 2018;42(4):747-53.

[81] Femino JE, Vaseenon T, Levin DA, Yian EH. Modification of the sinus tarsi approach for open reduction and plate fixation of **intra-articular calcaneus fractures**: the limits of proximal extension based upon the vascular anatomy of the lateral calcaneal artery. *The Iowa orthopaedic journal*. 2010;30:161-7.

[82] Giannoudis PV, MacDonald DA, Matthews SJ, Smith RM, Furlong AJ, De Boer P. Nonunion of the femoral diaphysis. *Journal of Bone and Joint Surgery - Series B*. 2000;82(5):655-8.

[83] Moghaddam A, Weiss S, Wöfl CG, et al. Cigarette smoking decreases TGF- $\beta$ 1 serum concentrations after long bone fracture. *Injury*. 2010;41(10):1020-5.

[84] Rose PS, Adams CR, Torchia ME, Jacofsky DJ, Haidukewych GG, Steinmann SP. Locking plate fixation for proximal humeral fractures: Initial results with a new implant. *Journal of Shoulder and Elbow Surgery*. 2007;16(2):202-7.

[85] Thompson P, Patel V, Fallat LM, Jarski R. Surgical Management of Fifth Metatarsal Diaphyseal Fractures: A Retrospective Outcomes Study. *Journal of Foot and Ankle Surgery*. 2017;56(3):463-7.

[86] Li Q, Liu P, Wang G, et al. Risk Factors of Surgical Site Infection after Acetabular Fracture

Surgery. *Surgical Infections*. 2015;16(5):577-82.

[87] Xu H, Yu L, Li Y, Gong Z. Prolonged surgical duration, higher body mass index and current smoking increases risk of surgical site infection after intra-articular fracture of distal femur. *ANZ journal of surgery*. 2019;89(6):723-8.

[88] Zhu Y, Liu S, Zhang X, Chen W, Zhang Y. Incidence and risks for surgical site infection after adult tibial plateau fractures treated by ORIF: a prospective multicentre study. *International Wound Journal*. 2017;14(6):982-8.

[89] Fourgeaux A, Estens J, Fabre T, Laffenetre O, Lucas y Hernandez J. Three-dimensional computed tomography analysis and functional results of calcaneal fractures treated by an intramedullary nail. *International Orthopaedics*. 2019;43(12):2839-47.

[90] Hoffmann MF, Khoriaty JD, Sietsema DL, Jones CB. Outcome of intramedullary nailing treatment for intertrochanteric femoral fractures. *Journal of orthopaedic surgery and research*. 2019;14(1):360.

[91] Serrano R, Mir HR, Sagi HC, et al. Modern Results of Functional Bracing of Humeral Shaft Fractures: A Multicenter Retrospective Analysis. *Journal of orthopaedic trauma*. 2020;34(4):206-9.

[92] Hu J, Zhang C, Zhu K, et al. Adverse Radiographic Outcomes Following Operative Treatment of Medial Malleolar Fractures. *Foot and Ankle International*. 2018;39(11):1301-11.

[93] Alemdaroğlu KB, Tiftikçi U, İltar S, et al. Factors affecting the fracture healing in treatment of tibial shaft fractures with circular external fixator. *Injury*. 2009;40(11):1151-6.

[94] Grün W, Molund M, Nilsen F, Stødle AH. Results After Percutaneous and Arthroscopically Assisted Osteosynthesis of Calcaneal Fractures. *Foot and Ankle International*. 2020;41(6):689-97.

[95] Vander Voort W, Davison J, Hendrickson N, et al. Sarcopenia is Associated with Nonunion of Open Tibia and Ankle Fractures. *The Iowa orthopaedic journal*. 2020;40(1):153-8.

[96] Barış A, Çirci E, Demirci Z, Öztürkmen Y. Minimally invasive medial plate osteosynthesis in tibial pilon fractures: Longterm functional and radiological outcomes. *Acta orthopaedica et traumatologica turcica*. 2020;54(1):20-6.

[97] O'Halloran K, Coale M, Costales T, et al. Will My Tibial Fracture Heal? Predicting Nonunion at the Time of Definitive Fixation Based on Commonly Available Variables. *Clin Orthop Relat Res*. 2016;474(6):1385-95.

[98] Naumann MG, Sigurdson U, Utvåg SE, Stavem K. Functional outcomes following surgical-site infections after operative fixation of closed ankle fractures. *Foot and Ankle Surgery*. 2017;23(4):311-6.

[99] Kawasaki N, Takegami Y. Prediction of delayed union of tibial shaft fracture treated with intramedullary nailing: multicenter-study analysis and literature review -the TRON study. 2021.

[100] Ahmed U, Khalid Z, Hassan M, Ullah UK. Outcome of open fractures of Tibia treated with interlocking & intermedullary nail in terms of infection and union. *Medical Forum Monthly*. 2020;31(12):90-3.

- [101] Cammas C, Ancion A, Detrembleur C, Tribak K, Putineanu D, Cornu O. Frequency and risk factors of complications after surgical treatment of ankle fractures : a retrospective study of 433 patients. *Acta Orthop Belg.* 2020;86(3):563-74.
- [102] Halonen LM, Stenroos A, Vasara H, Huotari K, Kosola J. Infections after intramedullary fixation of trochanteric fractures are uncommon and implant removal is not usually needed. *Injury.* 2021;52(6):1511-6.
- [103] Goudie EB, Robinson CM. Prediction of Nonunion After Nonoperative Treatment of a Proximal Humeral Fracture. *J Bone Joint Surg Am.* 2021;103(8):668-80.
- [104] Glassman SD, Anagnost Sc Fau - Parker A, Parker A Fau - Burke D, Burke D Fau - Johnson JR, Johnson Jr Fau - Dimar JR, Dimar JR. The effect of cigarette smoking and smoking cessation on spinal fusion. 2000(0362-2436 (Print)).
- [105] Sørensen LT, Hemmingsen U, Jørgensen T. Strategies of smoking cessation intervention before hernia surgery--effect on perioperative smoking behavior. *Hernia.* 2007;11(4):327-33.
- [106] Delaunay F, Coquerel-Beghin D, Magalon G, et al. A preoperative cotinury test for abdominoplasty reduces peri-operative complications. *Ann Chir Plast Esthet.* 2018;63(4):307-15.
- [107] Padubidri AN, Yetman R, Browne E, et al. Complications of postmastectomy breast reconstructions in smokers, ex-smokers, and nonsmokers. *Plast Reconstr Surg.* 2001;107(2):342-9; discussion 50-1.
- [108] Møller AM, Villebro N, Pedersen T, Tønnesen H. Effect of preoperative smoking intervention on postoperative complications: a randomised clinical trial. *Lancet.* 2002;359(9301):114-7.
- [109] Araco A, Gravante G, Sorge R, Araco F, Delogu D, Cervelli V. Wound infections in aesthetic abdominoplasties: The role of smoking. *Plastic and Reconstructive Surgery.* 2008;121(5):305e-10e.
- [110] Chan LK, Withey S, Butler PE. Smoking and wound healing problems in reduction mammoplasty: is the introduction of urine nicotine testing justified? *Ann Plast Surg.* 2006;56(2):111-5.
- [111] Gravante G, Araco A, Sorge R, Araco F, Delogu D, Cervelli V. Wound infections in post-bariatric patients undergoing body contouring abdominoplasty: The role of smoking. *Obesity Surgery.* 2007;17(10):1325-31.
- [112] Gravante G, Araco A, Sorge R, et al. Postoperative wound infections after breast reductions: The role of smoking and the amount of tissue removed. *Aesthetic Plastic Surgery.* 2008;32(1):25-31.
- [113] Herrero C, Tang A, Wasterlain A, et al. Smoking cessation correlates with a decrease in infection rates following total joint arthroplasty. *J Orthop.* 2020;21:390-4.
- [114] Jung KH, Kim SM, Choi MG, et al. Preoperative smoking cessation can reduce postoperative complications in gastric cancer surgery. *Gastric Cancer.* 2015;18(4):683-90.
- [115] Kuri M, Nakagawa M, Tanaka H, Hasuo S, Kishi Y. Determination of the duration of preoperative smoking cessation to improve wound healing after head and neck surgery. *Anesthesiology.* 2005;102(5):892-6.

- [116] Quan H, Ouyang L, Zhou H, Ouyang Y, Xiao H. The effect of preoperative smoking cessation and smoking dose on postoperative complications following radical gastrectomy for gastric cancer: A retrospective study of 2469 patients. *World Journal of Surgical Oncology*. 2019;17(1).
- [117] Sørensen LT, Jørgensen T. Short-term pre-operative smoking cessation intervention does not affect postoperative complications in colorectal surgery: a randomized clinical trial. *Colorectal Dis*. 2003;5(4):347-52.
- [118] Thomsen T, Tønnesen H, Okholm M, et al. Brief smoking cessation intervention in relation to breast cancer surgery: a randomized controlled trial. *Nicotine Tob Res*. 2010;12(11):1118-24.
- [119] Yoshida N, Baba Y, Hiyoshi Y, et al. Duration of Smoking Cessation and Postoperative Morbidity After Esophagectomy for Esophageal Cancer: How Long Should Patients Stop Smoking Before Surgery? *World journal of surgery*. 2016;40(1):142-7.
- [120] Sorensen LT, Karlsmark T, Gottrup F. Abstinence from smoking reduces incisional wound infection: a randomized controlled trial. *Annals of surgery*. 2003;238(1):1-5.
- [121] Sørensen LT, Toft BG, Rygaard J, et al. Effect of smoking, smoking cessation, and nicotine patch on wound dimension, vitamin C, and systemic markers of collagen metabolism. *Surgery*. 2010;148(5):982-90.
- [122] Lindström D, Sadr Azodi O, Wladis A, et al. Effects of a perioperative smoking cessation intervention on postoperative complications: a randomized trial. *Ann Surg*. 2008;248(5):739-45.
- [123] Adams CI, Keating JF, Court-Brown CM. Cigarette smoking and open tibial fractures. *Injury*. 2001;32(1):61-5.
- [124] Dinah AF, Vickers RH. Smoking increases failure rate of operation for established non-union of the scaphoid bone. *International Orthopaedics*. 2007;31(4):503-5.
- [125] Jin PF, Wang ZQ, Song HP. Risk factors for nonunion of closed tibial shaft fractures. *J North China Univ Sci Technol (Health Sciences Edition)*. 2018;20(5):378-83.
- [126] Little CP, Burston BJ, Hopkinson-Woolley J, Burge P. Failure of surgery for scaphoid non-union is associated with smoking. *Journal of Hand Surgery*. 2006;31(3):252-5.
- [127] McKee MD, DiPasquale DJ, Wild LM, Stephen DJG, Kreder HJ, Schemitsch EH. The effect of smoking on clinical outcome and complication rates following Ilizarov reconstruction. *Journal of Orthopaedic Trauma*. 2003;17(10):663-7.
- [128] Zura R, Watson JT, Einhorn T, et al. An inception cohort analysis to predict nonunion in tibia and 17 other fracture locations. *Injury*. 2017;48(6):1194-203.
- [129] Tay WH, De Steiger R, Richardson M, Gruen R, Balogh ZJ. Health outcomes of delayed union and nonunion of femoral and tibial shaft fractures. *Injury*. 2014;45(10):1653-8.
- [130] Olsen LL, Møller AM, Brorson S, Hasselager RB, Sort R. The impact of lifestyle risk factors on the rate of infection after surgery for a fracture of the ankle. *Bone and Joint Journal*. 2017;99-B(2):225-30.
- [131] Castillo RC, Bosse MJ, MacKenzie EJ, et al. Impact of smoking on fracture healing and risk

of complications in limb-threatening open tibia fractures. *Journal of orthopaedic trauma*. 2005;19(3):151-7.

[132] Harvey EJ, Agel J, Selznick HS, Chapman JR, Henley MB. Deleterious effect of smoking on healing of open tibia-shaft fractures. *American journal of orthopedics (Belle Mead, NJ)*. 2002;31(9):518-21.

[133] Hernigou J, Schuind F. Smoking as a predictor of negative outcome in diaphyseal fracture healing. *International Orthopaedics*. 2013;37(5):883-7.

[134] Ristiniemi J, Flinkkilä T, Hyvönen P, et al. Two-ring hybrid external fixation of distal tibial fractures: A review of 47 cases. *Journal of Trauma - Injury, Infection and Critical Care*. 2007;62(1):174-83.

[135] Ruffolo MR, Gettys FK, Montijo HE, Seymour RB, Karunakar MA. Complications of high-energy bicondylar tibial plateau fractures treated with dual plating through 2 incisions. *Journal of Orthopaedic Trauma*. 2015;29(2):85-90.

[136] Schmitz MA, Finnegan M, Natarajan R, Chainpine J. Effect of smoking on tibial shaft fracture healing. *Clinical Orthopaedics and Related Research*. 1999(365):184-200.

[137] Nåsell H, Ottosson C, Törnqvist H, Lindé J, Ponzer S. The impact of smoking on complications after operatively treated ankle fractures-a follow-up study of 906 patients. *Journal of Orthopaedic Trauma*. 2011;25(12):748-55.

[138] Lack WD, Starman JS, Seymour R, et al. Any Cortical Bridging Predicts Healing of Tibial Shaft Fractures. *J Bone Joint Surg Am*. 2014;96(13):1066-72.

[139] Matson AP, Hamid KS, Adams SB. Predictors of Time to Union After Operative Fixation of Closed Ankle Fractures. *Foot & ankle specialist*. 2017;10(4):308-14.

[140] Penn-Barwell JG, Bennett PM, Mortiboy DE, Fries CA, Groom AF, Sargeant ID. Factors influencing infection in 10 years of battlefield open tibia fractures. *Strategies Trauma Limb Reconstr*. 2016;11(1):13-8.

[141] Lawing CR, Lin FC, Dahners LE. Local Injection of Aminoglycosides for Prophylaxis Against Infection in Open Fractures. *J Bone Joint Surg Am*. 2015;97(22):1844-51.

[142] Molina CS, Stinner DJ, Fras AR, Evans JM. Risk factors of deep infection in operatively treated pilon fractures (AO/OTA: 43). *Journal of Orthopaedics*. 2015;12:S7-S13.

[143] Zhang D, Freemantle N, Cheng KK. Are randomized trials conducted in China or India biased? A comparative empirical analysis. *J Clin Epidemiol*. 2011;64(1):90-5.

[144] Sørensen LT. Wound healing and infection in surgery. The clinical impact of smoking and smoking cessation. A systematic review and meta-analysis. *Wound Repair and Regeneration*. 2012;20(5):A113.

[145] Wong J, Lam DP, Abrishami A, Chan MT, Chung F. Short-term preoperative smoking cessation and postoperative complications: a systematic review and meta-analysis. *Canadian journal of anaesthesia = Journal canadien d'anesthesie*. 2012;59(3):268-79.
